# Supplementary material for: A stable microtubule bundle formed through an orchestrated multistep process controls quiescence exit
Source: eLife. 2024 Mar 25;12:RP89958. doi: 10.7554/eLife.89958 (PMC10963028; doi:10.7554/eLife.89958)
Supplement: Figure 1—figure supplement 1—source data 1. [file elife-89958-fig1-figsupp1-data1.xlsx]

## Sheet: CCL
	haploid							Diploid homo						Diploid hetero
	DAta1			Data2				DAta1			Data2			Data1			Data2
		Y12230	4d		Y10626	4d			Y12245	4d	Y12245	4d			Y12244	4d	Y12244	4d
	Mean	592.384	n=	Mean	525.946	n=		Mean	951.752	n=	852.164	n=		Mean	746.256	n=	770.51	n=
	SD	266.458	45	SD	134.214	43		SD	294.588	46	242.585	35		SD	206.266	60	240.777	22
	T-test inter	0.141854						0.00550031						0.565115
	T-test vs condition							8.94264e-18						3.26846e-08
	502.89			565.537				631.562			436.156			493.75	690.781		1487.13
	1386.27			533.681				660.112			547.188			409.687	724.504		735.468
	343.703			965.423				545.74			828.552			560.505	741.962		486.611
	510.731			447.846				1356.56			970.931			465.892	1249.21		763.461
	739.554			437.498				907.642			531.198			761.728	904.262		799.677
	606.172			407.536				989.449			777.632			502.734	692.826		651.929
	554.811			506.689				1260.58			639.768			730.278	688.25		614.779
	602.696			476.655				875.219			633.649			916.76	759.026		554.221
	339.454			389.413				710.525			804.645			1247.59	499.08		654.056
	408.725			508.697				571.624			1056.74			1200.86	855.281		734.228
	392.677			497.237				907.555			921.766			445.205	744.915		643.478
	299.266			437.595				1217.95			917.232			672.346	579.953		839.234
	636.567			420.047				1164.6			1154.36			1069	710.694		970.63
	552.574			512.737				924.636			923.121			892.289	709.296		876.55
	660.924			385.888				1157.12			724.898			1056.18			477.048
	524.81			576.052				1164.46			405.952			744.859			732.831
	795.571			525.952				1176.75			892.195			752.628			859.023
	659.869			706.648				1524.44			640.634			1111.33			727.559
	278.758			515.176				705.44			775.134			743.021			541.14
	677.16			734.508				791.13			934.552			655.132			1097.87
	995.119			346.757				1973.35			1360.48			731.888			1151.08
	715.087			470.6				945.723			1266.21			475.524			553.22
	653.428			504.426				705.415			1033.96			608.499
	612.513			432.185				736.247			1139.69			839.932
	404.573			383.382				1579.69			598.868			926.398
	381.539			414.632				1473.62			817.259			697.379
	381.539			272.578				881.688			889.122			718.022
	479.073			626.244				1016			1320.66			609.915
	676.393			445.263				853.143			826.991			554.382
	1731.29			793.413				958.046			1022.03			668.912
	403.127			559.828				1199.64			735.313			924.134
	445.026			465.768				1051.82			736.43			659.413
	398.323			677.161				1032.77			554.344			643.842
	779.831			577.058				1222.25			1193.23			1034.96
	466.439			490.78				1115.75			814.849			597.462
	553.546			583.526				742.203						679.314
	538.679			609.58				1109.68						772.347
	500.987			773.324				960.728						580.522
	488.094			385.032				1320.46						621.07
	429.299			486.426				1566.65						532.364
	892.317			452.633				1402.31						669.502
	684.025			652.559				708.016						699.055
	346.135			661.73				747.016						664.317
	730.547							1144.65						809.424
	497.138							1019.7						886.273
								556.499						655.13

## Sheet: haploid Y12230 4d
	-bkg roll ball 50, select slide, NO PROJ, measure on structure line scan 6pixel and bkg 13 pix				-bkg roll ball 50, select slide, NO PROJ, measure on structure line scan 6pixel and bkg 13 pix				-bkg roll ball 50, select slide, NO PROJ, measure on structure line scan 6pixel and bkg 13 pix				-bkg roll ball 50, select slide, NO PROJ, measure on structure line scan 6pixel and bkg 13 pix				-bkg roll ball 50, select slide, NO PROJ, measure on structure line scan 6pixel and bkg 13 pix				-bkg roll ball 50, select slide, NO PROJ, measure on structure line scan 6pixel and bkg 13 pix				-bkg roll ball 50, select slide, NO PROJ, measure on structure line scan 6pixel and bkg 13 pix				-bkg roll ball 50, select slide, NO PROJ, measure on structure line scan 6pixel and bkg 13 pix				-bkg roll ball 50, select slide, NO PROJ, measure on structure line scan 6pixel and bkg 13 pix				-bkg roll ball 50, select slide, NO PROJ, measure on structure line scan 6pixel and bkg 13 pix				-bkg roll ball 50, select slide, NO PROJ, measure on structure line scan 6pixel and bkg 13 pix				-bkg roll ball 50, select slide, NO PROJ, measure on structure line scan 6pixel and bkg 13 pix
	ROI 24				ROI 23 TILTED				ROI 22				ROI 21 TILTED				ROI 19 TILTED				ROI 18 TILTED				ROI 17				ROI 16				ROI 15 TILTED				ROI 13				ROI 12				ROI 11 TILTED
	1 slide				1 slide				1 slide				1 slide				1 slide				1 slide				1 slide				1 slide				1 slide				1 slide				1 slide				1 slide
			502.89				1386.27				343.703				510.731				739.554				606.172				554.811				602.696				339.454				408.725				392.677				299.266
			489.743				1393.58				349.857				510.602				746.959				602.333				548.605				591.349				337.855				404.171				386.203				304.404
			476.138				1330.35				330.23				486.895				711.564				587.91				538.714				569.819				319.457				397.984				380.751				270.177
	675.878	437.757	442.226		1099.45	938.27	299.326		428.269	338.95	165.878		623.945	563.988	111.349		945.158	697.341	460.233		779.262	599.118	334.552		531.589	387.953	266.753		445.62	333.723	207.807		371.465	270.184	188.093		568.385	442.511	233.765		362.035	280.855	150.763		448.538	362.442	159.893
	739.42	483.038	476.138		1380.75	1091.49	537.198		539.39	427.686	207.45		700.205	578.177	226.623		1166.15	826.845	630.137		873.153	627.206	456.759		634.846	438.55	364.549		587.264	410.654	327.991		410.533	297.088	210.684		732.919	561.178	318.947		433.434	321.318	208.216		491.63	378.929	209.302
	807.613	515.342	542.788		1691.94	1237.54	843.891		623.705	487.166	253.572		848.409	625.958	413.123		1349.25	939.949	760.138		1030.74	714.172	587.91		755.501	515.246	446.187		776.826	513.457	489.115		513.25	366.343	272.826		943.678	729.378	397.984		495.669	374.017	225.926		501.157	389.528	207.31
	750.965	487.257	489.743		1975.43	1363.3	1136.81		668.526	544.443	230.439		911.954	649.78	486.895		1339.69	937.476	746.959		1093.37	755.071	628.273		848.864	553.462	548.605		879.798	572.972	569.819		551.466	386.979	305.476		1024.69	807.063	404.171		578.193	427.281	280.265		517.67	381.385	253.102
	661.494	429.035	431.71		2159.43	1443.09	1330.35		697.428	565.347	245.293		981.575	693.661	534.698		1285.78	902.628	711.564		1094.96	770.627	602.333		892.092	581.338	577.115		968.289	619.948	646.92		607.806	413.394	361.051		1087.26	858.94	424.02		653.181	461.092	356.737		521.399	388.205	247.361
	626.615	403.307	414.714		2232.52	1482.13	1393.58		716.91	579.402	255.371		933.007	658.068	510.602		1221.9	863.658	665.311		1040.84	735.154	567.704		842.935	552.858	538.714		934.394	615.976	591.349		567.528	395.512	319.457		1065.99	855.33	391.232		680.456	459.106	411.078		562.029	416.567	270.144
	552.847	381.973	317.338		2243	1470.37	1434.9		774.051	585.667	349.857		883.156	647.598	437.464		1049.71	762.071	534.179		980.97	691.347	537.872		808.957	544.124	491.834		859.085	561.406	552.831		552.399	383.888	312.948		967.922	785.355	339.054		648.082	440.127	386.203		582.66	418.75	304.404
	483.96	336.71	273.465		2057.52	1375.2	1267.16		732.162	543.151	351.022		819.806	619.004	372.918		1030.4	724.428	568.235		950.886	675.461	511.505		783.383	548.17	436.825		765.288	520.094	455.359		553.807	371.886	337.855		908.156	743.257	306.241		627.067	427.273	371.047		595.462	421.423	323.216
	475.873	323.818	282.388		1897.1	1313.04	1084.68		669.247	491.431	330.23		669.598	553.081	216.389		932.251	672.005	483.315		885.072	634.499	465.351		816.428	563.261	470.167		718.577	499.896	406.121		505.406	357.412	274.846		863.351	708.986	286.677		628.696	423.676	380.751		552.388	406.908	270.177
	466.987	319.793	273.36		1669.51	1146.04	972.166		609.402	458.824	279.645		615.991	507.843	200.846		868.806	651.362	403.823		804.788	589.258	400.27		812.046	547.426	491.437		747.984	511.355	439.453		535.992	376.68	295.865		834.485	680.221	286.489		582.144	395.788	346.091		512.21	398.425	211.316
	462.321	308.921	284.886		1472.76	1046.66	791.324		589.869	450.529	258.774		512.184	465.519	86.6643		734.397	571.503	302.517		718.442	544.537	322.965		775.051	520.093	473.494		720.018	501.172	406.429		477.945	348.637	240.143		785.394	636.862	275.845		549.28	377.798	318.467		516.483	401.808	212.968
	475.608	320.418	288.21				0		590.837	451.63	258.527		423.565	418	10.3344		730.237	561.085	314.14		655.872	502.146	285.492		776.203	526.835	463.114		668.425	477.121	355.278		495.83	349.775	271.244		735.311	608.149	236.158		562.244	390.955	318.107		499.716	383.848	215.182
	488.329	332.241	289.877				0		570.34	435.579	250.27										597.034	471.185	233.72		748.558	505.285	451.791		687.867	490.181	367.13		459.049	336.631	227.347		724.227	603.348	224.489		536.666	380.486	290.048		472.215	379.776	171.673
	486.763	324.912	300.582				0		514.346	400.219	211.951										526.127	417.064	202.547		748.352	492.384	475.37		635.279	480.387	287.656		468.195	343.501	231.575		689.565	590.123	184.678		518.069	367.366	279.878		490.601	379.683	205.991
	424.971	291.061	248.69				0		501.825	377.259	231.339										501.061	409.561	169.928		714.206	476.977	440.567		605.817	449.4	290.488		445.602	336.939	201.801		663.299	554.865	201.377		459.519	348.04	207.033		464.174	365.826	182.646
	402.924	276.403	234.968				0		501.605	392.552	202.527														691.821	466.322	418.784		526.085	404.403	225.98		399.472	309.159	167.724		611.135	516.014	176.655		445.072	336.561	201.519		477.39	372.098	195.542
	385.266	275.073	204.644				0		467.75	374.997	172.256														671.551	460.017	392.848		478.82	405.885	135.449		392.692	313.887	146.351		565.602	487.134	145.726		448.511	335.246	210.348		431.087	348.522	153.334
	411.541	277.575	248.793				0		463.651	371.768	170.64														648.125	440.284	385.99		442.822	374.289	127.275		377.445	301.054	141.87		541.587	467.744	137.136		441.305	341.65	185.074				0
	409.648	279.283	242.106				0		451.266	359.713	170.028														675.793	450.225	418.912		404.365	346.454	107.548		389.552	294.249	176.992		531.035	431.904	184.1		432.063	337.675	175.292				0
	402.218	282.843	221.697				0		427.61	348.481	146.954														617.046	423.985	358.541				0				0		531.975	442.603	165.976		386.542	313.891	134.923				0
	389.336	269.752	222.084				0		360.6	308.645	96.4882														589.273	400.459	350.655				0				0		508.812	410.501	182.577		369.785	296.526	136.052				0
	364.774	255.024	203.821				0		329.546	281.781	88.7061														516.88	360.389	290.626				0				0		454.21	369.952	156.48		361.066	274.483	160.798				0
	328.306	242.32	159.688				0		326.469	279.296	87.607														455.609	312.148	266.427				0				0		384.445	328.269	104.327		371.39	282.003	166.005				0
	335.26	258.784	142.028				0		310.206	268.836	76.8298														427.563	300.929	235.178				0				0		411.295	345.777	121.676		334.721	270.85	118.616				0
	291.46	234.661	105.484				0		303.223	266.481	68.2353														404.221	294.72	203.358				0				0		357.911	317.6	74.8642		319.324	263.902	102.926				0
			0				0		286.156	261.033	46.6559														391.023	280.344	205.545				0				0		355.986	301.568	101.062		290.801	247.583	80.2622				0
			0				0		291.281	259.47	59.0774														330.573	257.538	135.637				0				0		370.31	318.869	95.5331		288.316	241.133	87.6252				0
			0				0		266.897	235.323	58.6384														336.439	249.225	161.97				0				0		354.424	314.531	74.0876		281.859	237.225	82.8919				0
			0				0		254.757	243.567	20.7829														329.173	233.429	177.811				0				0		352.988	308.873	81.9267		249.999	222.609	50.8671				0
			0				0		239.698	236.181	6.53176														299.749	234.769	120.677				0				0		354.592	294.072	112.394				0				0
			0				0		286.418	245.298	76.3661														302.704	227.228	140.168				0				0		332.666	284.344	89.741				0				0
			0				0		255.936	243.522	23.0551														283.48	218.815	120.093				0				0		329.026	286.168	79.5938				0				0
			0				0		226.725	224.299	4.50469														265.129	206.054	109.71				0				0		317.363	279.899	69.5777				0				0
			0				0		251.475	236.987	26.9063														216.664	174.808	77.7331				0				0		314.956	273.278	77.402				0				0
			0				0		240.805	216.603	44.9455														170.496	150.985	36.2349				0				0		304.455	269.406	65.0917				0				0
			0				0		242.77	231.788	20.3963
			0				0		235.19	231.796	6.30314
			0				0		230.089	222.298	14.4684
			0				0		240.592	222.303	33.966
			0				0		259.076	235.11	44.5079
			0				0		218.154	220.242	-3.87641
			0				0		214.772	214.018	1.40103
			0				0		215.437	219.084	-6.77263
	-bkg roll ball 50, select slide, NO PROJ, measure on structure line scan 6pixel and bkg 13 pix				-bkg roll ball 50, select slide, NO PROJ, measure on structure line scan 6pixel and bkg 13 pix				-bkg roll ball 50, select slide, NO PROJ, measure on structure line scan 6pixel and bkg 13 pix				-bkg roll ball 50, select slide, NO PROJ, measure on structure line scan 6pixel and bkg 13 pix				-bkg roll ball 50, select slide, NO PROJ, measure on structure line scan 6pixel and bkg 13 pix				-bkg roll ball 50, select slide, NO PROJ, measure on structure line scan 6pixel and bkg 13 pix				-bkg roll ball 50, select slide, NO PROJ, measure on structure line scan 6pixel and bkg 13 pix				-bkg roll ball 50, select slide, NO PROJ, measure on structure line scan 6pixel and bkg 13 pix				-bkg roll ball 50, select slide, NO PROJ, measure on structure line scan 6pixel and bkg 13 pix
	ROI 10				ROI 9				ROI 9				ROI 7				ROI 6				ROI 4				ROI 3				ROI 2				ROI 1
	1 slide				1 slide				1 slide				1 slide				1 slide				1 slide				1 slide				1 slide				1 slide
			404.573				381.539				381.539				479.073				676.393				1731.29				403.127				445.026				398.323
			392.484				385.641				385.641				473.972				698.989				1762.36				394.863				437.604				381.834
			378.405				359.287				359.287				460.339				614.529				1610.58				394.583				428.502				374.508
	635.752	459.297	327.702		561.637	402.82	294.947		561.637	402.82	294.947		627.075	462.444	305.742		838.58	601.116	441.003		1355.58	900.746	844.69		575.094	400.412	324.41		405.432	317.209	163.841		600.425	491.259	202.738
	690.868	479.53	392.484		568.543	414.229	286.581		568.543	414.229	286.581		773.469	537.748	437.768		979.009	648.108	614.529		1842.23	1169.86	1248.69		601.492	433.709	311.598		474.153	346.125	237.765		670.702	525.774	269.152
	739.764	501.317	442.83		637.458	443.996	359.287		637.458	443.996	359.287		832.016	584.141	460.339		1081.98	696.62	715.662		2256.36	1389.57	1609.74		665.505	455.5	390.01		603.713	423.991	333.77		718.288	539.517	332.004
	674.169	470.413	378.405		650.994	470.549	335.112		650.994	470.549	335.112		861.839	591.042	502.908		1073.64	697.263	698.989		2489.39	1540.42	1762.36		657.251	444.632	394.863		636.88	443.098	359.88		757.365	551.763	381.834
	689.07	485.38	378.283		685.566	470.348	399.69		685.566	470.348	399.69		826.609	571.393	473.972		977.392	662.764	584.308		2500.94	1520.44	1820.94		645.325	432.857	394.583		646.153	458.261	348.943		824.144	587.96	438.628
	645.788	450.302	363.046		663.908	456.255	385.641		663.908	456.255	385.641		766.355	524.801	448.601		904.314	626.238	516.427		2271.74	1404.5	1610.58		677.107	450.989	419.933		641.622	430.408	392.255		772.357	576.39	363.939
	624.582	435.099	351.897		621.032	437.918	340.068		621.032	437.918	340.068		769.633	529.957	445.112		828.658	580.955	460.019		1995.93	1262.11	1362.82		640.961	435.9	380.827		647.417	429.707	404.318		730.928	532.743	368.059
	614.3	431.972	338.61		570.587	412.25	294.054		570.587	412.25	294.054		759.258	517.907	448.224		754.839	562.263	357.642		1837.94	1196.52	1191.21		592.329	429.198	302.958		673.944	443.213	428.502		715.043	513.385	374.508
	556.78	395.701	299.146		548.517	396.966	281.452		548.517	396.966	281.452		746.763	531.952	398.934		681.345	516.568	306.014		1651.8	1085.3	1052.07		570.671	406.67	304.573		674.588	453.773	410.085		662.237	486.744	325.916
	528.342	393.78	249.9		492.173	355.358	254.087		492.173	355.358	254.087		754.581	528.199	420.422		625.568	490.04	251.695		1510.32	981.196	982.661		551.109	396.651	286.851		668.343	465.488	376.73		625.329	473.665	281.662
	512.966	375.845	254.653		521.399	381.882	259.105		521.399	381.882	259.105		744.248	528.086	401.444		592.682	462.721	241.356		1403.46	935.337	869.367		531.711	376.141	288.916		691.482	473.862	404.152		646.515	487.169	295.928
	539.317	380.25	295.41		513.566	383.437	241.668		513.566	383.437	241.668		705.392	510.961	361.087		578.128	452.066	234.116		1343.08	910.156	804.01		479.404	359.043	223.528		719.543	467.019	468.973		686.135	503.863	338.505
	532.331	387.305	269.333		445.831	356.561	165.788		445.831	356.561	165.788		684.196	495.803	349.873		586.111	439.081	273.055		1318.05	885.774	802.806		521.657	379.166	264.628		653.945	418.312	437.604		691.392	508.985	338.755
	525.652	393.381	245.644		512.517	382.373	241.696		512.517	382.373	241.696		658.067	467.562	353.795		535.712	421.899	211.367		1259.9	853.095	755.498		474.674	357.312	217.959		587.879	398.985	350.802		671.648	505.648	308.287
	493.143	379.851	210.398		482.981	362.93	222.953		482.981	362.93	222.953		614.804	448.058	309.672		535.229	412.37	228.167		1311.34	879.952	801.14		454.017	340.961	209.96		546.157	368.425	330.073		651.731	488.716	302.741
	484.953	380.144	194.646		453.751	350.365	192.002		453.751	350.365	192.002		664.112	475.005	351.199		516.302	397.517	220.602		1300.62	846.461	843.432		458.555	329.604	239.48		546.585	373.393	321.643		643.102	485.982	291.794
	465.071	363.114	189.347		453.225	351.017	189.816		453.225	351.017	189.816		603.983	436.167	311.659		507.91	388.906	221.008		1232.19	855.307	699.929		448.589	327.757	224.402		574.736	395.43	332.996		606.228	461.174	269.385
	455.567	347.187	201.276		450.667	353.848	179.808		450.667	353.848	179.808		616.64	459.39	292.036		519.413	393.206	234.385		1225.9	829.944	735.352		445.926	341.677	193.606		618.521	420.986	366.85		601.671	466.36	251.291
	463.317	358.585	194.503		489.888	368.759	224.955		489.888	368.759	224.955		577.905	442.549	251.375		465.238	353.746	207.057		1197.36	818.912	702.836		420.905	324.976	178.153		560.677	394.158	309.25		627.847	490.808	254.5
	449.416	366.985	153.086		422.039	328.776	173.203		422.039	328.776	173.203		610.126	471.296	257.826		418.885	325.582	173.276		1176.99	800.58	699.055		405.344	332.165	135.904		493.668	364.643	239.617		598.827	461.897	254.299
	430.676	359.161	132.813		395.622	309.889	159.218		395.622	309.889	159.218		569.792	448.876	224.558		416.933	332.926	156.012		1150.82	810.531	631.964		369.647	299.029	131.148		460.376	341.294	221.152		616.495	482.935	248.038
	429.523	347.701	151.955		361.587	301.275	112.009		361.587	301.275	112.009		580.181	436.62	266.614		407.384	335.095	134.251		1126.31	794.776	615.699		362.239	291.041	132.225		438.929	327.308	207.295		629.966	480.636	277.327
	415.581	329.762	159.378				0				0		572.006	444.612	236.589		392.709	329.014	118.291		1152.36	790.58	671.872		309.022	264.444	82.7877		432.997	330.809	189.779		587.31	461.839	233.016
	380.794	306.076	138.763				0				0		562.674	441.314	225.382		354.543	309.965	82.789		1115.16	767.834	645.042				0		416.291	313.957	190.049		593.518	467.045	234.878
	354.49	305.756	90.506				0				0		515.588	422.88	172.174		376.861	305.935	131.721		1079.63	781.848	553.027				0		397.122	299.451	181.389		588.16	475.406	209.399
	330.573	296.198	63.8391				0				0		502.667	413.588	165.432		358.223	300.79	106.662		1100.43	796.602	564.257				0		391.354	312.832	145.827		597.719	480.49	217.71
	327.03	291.045	66.83				0				0		477.081	413.797	117.526		336.988	289.46	88.2648		1073.14	756.646	587.777				0		390.568	313.95	142.291		559.803	453.116	198.132
	315.96	284.4	58.6099				0				0		465.524	404.3	113.701		302.886	275.249	51.3259		1042.61	748.961	545.338				0		402.341	312.62	166.625		544.649	432.006	209.195
			0				0				0		424.32	389.293	65.0505		330.517	300.921	54.9638		1007.55	729.367	516.625				0		359.438	294.997	119.676		516.003	422.88	172.943
			0				0				0				0		340.043	311.626	52.7731		947.029	691.625	474.321				0		362.982	293.773	128.53		488.166	404.927	154.587
			0				0				0				0		328.675	301.626	50.2339		877.195	656.468	409.92				0		333.477	281.377	96.7579		503.124	429.02	137.62
			0				0				0				0		302.449	290.924	21.4034		838.788	629.858	388.012				0		347.729	292.805	102.001		494.361	403.172	169.35
			0				0				0				0		322.553	303.325	35.7086		805.429	609.56	363.757				0		335.121	274.19	113.157		475.692	391.936	155.548
			0				0				0				0		340.275	324.954	28.4525		714.711	560.698	286.025				0		335.743	287.633	89.3479		456.692	384.62	133.848
			0				0				0				0		373.594	335.938	69.9313		676.534	529.344	273.354				0		313.361	274.254	72.6277		471.019	383.103	163.273
			0				0				0				0		331.771	307.51	45.0567		643.839	512.641	243.652						326.085	275.093	94.6983		447.95	368.101	148.293
			0				0				0				0		353.841	333.245	38.2488		606.78	514.817	170.789						339.457	292.955	86.3603		410.672	352.436	108.154
																	331.149	322.493	16.0765		519.122	470.094	91.0513						352.815	289.857	116.922		428.047	360.375	125.677
																													364.001	292.722	132.374		404.303	353.879	93.6449
																																	363.363	318.224	83.829
	-bkg roll ball 50, select slide, NO PROJ, measure on structure line scan 6pixel and bkg 13 pix				-bkg roll ball 50, select slide, NO PROJ, measure on structure line scan 6pixel and bkg 13 pix				-bkg roll ball 50, select slide, NO PROJ, measure on structure line scan 6pixel and bkg 13 pix				-bkg roll ball 50, select slide, NO PROJ, measure on structure line scan 6pixel and bkg 13 pix				-bkg roll ball 50, select slide, NO PROJ, measure on structure line scan 6pixel and bkg 13 pix				-bkg roll ball 50, select slide, NO PROJ, measure on structure line scan 6pixel and bkg 13 pix				-bkg roll ball 50, select slide, NO PROJ, measure on structure line scan 6pixel and bkg 13 pix				-bkg roll ball 50, select slide, NO PROJ, measure on structure line scan 6pixel and bkg 13 pix				-bkg roll ball 50, select slide, NO PROJ, measure on structure line scan 6pixel and bkg 13 pix				-bkg roll ball 50, select slide, NO PROJ, measure on structure line scan 6pixel and bkg 13 pix				-bkg roll ball 50, select slide, NO PROJ, measure on structure line scan 6pixel and bkg 13 pix				-bkg roll ball 50, select slide, NO PROJ, measure on structure line scan 6pixel and bkg 13 pix				-bkg roll ball 50, select slide, NO PROJ, measure on structure line scan 6pixel and bkg 13 pix
	ROI 31 TILTED				ROI 30 TILTED				ROI 29 TILTED				ROI 28				ROI 27 TILTED				ROI 26 TILTED				ROI 25 TILTED				ROI 24 TILTED				ROI 22 TILTED				ROI 21 TILTED				ROI 20				ROI 32 TILTED				ROI 1 TILTED
	1 slide				1 slide				1 slide				1 slide				1 slide				1 slide				1 slide				1 slide				1 slide				1 slide				1 slide				1 slide				1 slide
			636.567				552.574				660.924				524.81				795.571				659.869				278.758				677.16				995.119				715.087				653.428				612.513
			657.953				555.059				665.624				521.434				801.261				683.372				274.6				661.965				991.619				717.715				651.174				618.138
			592.53				546.772				646.21				508.982				782.298				612.07				272.081				656.929				976.847				679.775				650.388				598.977
	722.667	560.115	301.881		706.483	523.02	340.717		560.918	412.317	275.973		719.736	592.303	236.662		914.38	642.235	505.413		612.239	459.815	283.074		315.444	249.29	122.858		1232.81	969.82	488.415		454.169	489.294	-65.2336		714.756	523.603	354.998		472.294	317.401	287.658		750.116	558.983	354.961		804.069
	801.019	593.646	385.121		814.241	598.502	400.659		664.655	460.991	378.234		723.509	574.799	276.174		1024.57	707.814	588.256		792.5	542.912	463.521		387.578	272.213	214.249		1346.24	1024.56	597.411		598.08	552.26	85.0943		837.972	592.466	455.94		659.225	426.383	432.42		875.134	627.477	459.934		849.66
	866.565	618.001	461.62		883.197	628.446	473.11		753.718	497.466	475.895		726.582	560.299	308.812		1151.58	777.922	693.935		964.515	634.939	612.07		437.871	315.566	227.138		1393.96	1064.01	612.767		842.22	688.159	286.112		995.554	698.725	551.255		800.005	503.727	550.231		967.736	666.288	559.832		879.967
	930.621	649.391	522.284		908.954	627.736	522.262		893.481	591.864	560.145		836.218	596.82	444.596		1269	850.5	777.221		1026.54	658.141	684.166		460.391	323.835	253.605		1438.61	1082.16	661.965		1103.8	814.529	537.213		1135.71	769.681	679.775		898.412	543.716	658.722		989.73	698.709	540.467		900.207
	986.261	679.84	569.067		857.856	579.879	516.244		1020.73	662.314	665.624		915.591	634.819	521.434		1298.53	866.057	803.155		1031.99	664.023	683.372		497.504	349.642	274.6		1460.2	1076.5	712.588		1377.57	933.32	825.027		1193.08	790.438	747.77		895.005	544.797	650.388		1046.53	712.459	620.423		942.069
	1092.27	737.307	659.218		905.934	606.608	555.89		1061.06	699.784	670.939		945.797	652.867	544.014		1320.57	899.336	782.298		967.876	638.355	611.969		499.018	352.512	272.081		1347.14	994.378	655.126		1536.85	1013.74	971.489		1208.78	822.318	717.715		897.918	547.286	651.174		992.89	672.938	594.195		912.486
	1026.8	707.742	592.53		918.602	625.539	544.26		1039.09	691.132	646.21		876.177	602.11	508.982		1297.52	879.468	776.387		892.521	595.633	551.364		508.349	352.414	289.592		1276.31	922.583	656.929		1548.48	1014.53	991.619		1176.39	821.933	658.277		867.791	568.658	555.533		997.719	664.875	618.138		976.247
	1056.59	702.308	657.953		905.442	611.027	546.772		1021.56	684.426	626.11		839.545	578.78	484.277		1276.19	844.745	801.261		837.934	554.856	525.717		473.764	336.283	255.322		1136.47	820.006	587.725		1551.81	1004.26	1016.89		1122.47	789.76	617.899		835.526	536.562	555.218		1015.76	693.237	598.977		957.985
	977.604	669.919	571.415		917.289	618.411	555.059		1014.97	684.994	612.818		814.953	584.545	427.901		1204.03	825.473	703.026		734.678	505.417	425.772		448.675	333.141	214.564		1029.05	743.096	531.062		1477.14	951.144	976.847		1147.44	814.738	617.877		842.392	535.955	569.098		982.493	672.062	576.515		941.895
	920.322	651.763	498.751		889.107	613.276	512.258		997.718	668.383	611.622		819.363	578.847	446.673		1155.92	808.636	644.951		663.581	471.675	356.398		428.358	307.641	224.189		958.315	677.394	521.71		1388.28	931.164	848.932		1095.4	790.407	566.425		791.922	505.851	531.273		905.088	623.744	522.497		942.955
	954.474	663.534	540.318		899.876	629.127	502.82		991.33	666.069	604.057		754.744	549.241	381.648		1111.19	790.392	595.768		579.961	450.399	240.615		450.562	309.841	261.339		876.61	629.743	458.468		1303.89	892.854	763.347		1090.07	773.229	588.424		741.31	479.259	486.668		843.201	582.041	485.012		925.046
	922.74	648.21	509.842		881.051	613.632	496.636		953.724	656.178	552.586		749.617	558.139	355.602		1048.72	774.139	509.928		525.347	417.026	201.168		426.218	315.65	205.341		794.808	599.333	363.024		1291.17	882.157	759.6		1022.27	735.838	531.947		745.385	474.233	503.567		794.63	554.277	446.37		870.321
	880.592	655.655	417.741		811.37	583.353	423.46		917.721	643.074	510.058		724.196	534.588	352.128		962.324	731.656	428.383		492.847	395.673	180.466		407.473	308.023	184.693		734.196	551.213	339.824		1275.1	890.803	713.693		989.085	730.551	480.135		746.454	482.578	490.056		774.556	545.46	425.463		853.309
	838.587	597.18	448.327		801.66	578.217	414.965		853.823	609.533	453.681		674.055	508.017	308.355				0		452.82	372.028	150.042		403.606	303.318	186.248		715.163	525.124	352.93		1218.4	877.852	632.45		947.15	701.096	456.957		710.26	474.287	438.236		748.726	527.736	410.409		840.557
	768.377	565.513	376.749		761.732	554.674	384.537		845.723	593.974	467.533		651.439	487.371	304.697				0		409.397	349.217	111.763		388.028	282.781	195.458		620.481	476.586	267.234		1134.51	826.797	571.476		847.852	656.229	355.871		700.323	457.021	451.845		716.106	523.984	356.8		793.84
	776.586	579.352	366.293		700.047	512.588	348.139		812.008	577.856	434.855		627.225	473.931	284.688				0				0		394.912	289.526	195.718		606.592	469.639	254.341		1097.1	808.389	536.185		871.479	667.295	379.199		660.725	434.201	420.687		680.568	496.238	342.327		747.102
	739.836	560.009	333.965		680.901	519.456	299.826		761.029	555.163	382.323		601.047	472.545	238.646				0				0		426.656	315.539	206.359		566.226	445.106	224.937		1020.69	763.798	477.093		819.44	657.19	301.322		622.703	428.725	360.244		680.038	481.329	369.032		707.771
	745.731	565.652	334.433		662.077	527.778	249.412		738.445	561.429	328.744		577.604	441.05	253.599				0				0		407.181	318.383	164.912				0		948.18	721.981	420.084		738.67	620.601	219.271		646.674	437.995	387.546		626.21	479.326	272.786		669.172
	726.835	552.979	322.876		600.159	475.175	232.115		744.912	557.072	348.846		520.252	410.124	204.523				0				0		394.823	316.401	145.64				0		916.539	717.538	369.573		680.535	591.515	165.323		636.368	429.643	383.917		583.031	440.655	264.413		691.124
	708.577	534.091	324.045				0		718.247	540.235	330.594		558.886	428.377	242.375				0				0		399.994	315.409	157.088				0		871.266	689.098	338.311				0		566.837	398.927	311.834		551.004	438.431	209.065		649.336
	650.002	509.839	260.303				0		694.167	515.887	331.092		531.223	411.846	221.699				0				0		389.69	311.436	145.328				0		814.028	646.168	311.739				0		571.832	401.475	316.378		467.895	405.053	116.705		603.273
			0				0		668.553	503.998	305.602		493.418	375.322	219.321				0				0		416.106	329.932	160.037				0		753.575	616.196	255.133				0		570.662	386.796	341.467		450.054	386.712	117.635		561.02
			0				0		629.841	489.273	261.055		522.361	407.163	213.938				0				0		425.982	333.416	171.907				0		694.096	578.114	215.395				0		586.916	398.561	349.802		431.78	365.304	123.455		555.176
			0				0		631.015	484.014	273.003		499.652	387.466	208.346				0				0		400.594	317.196	154.883				0				0				0		594.107	393.755	372.081		423.363	360.337	117.047		557.353
			0				0		633.995	492.233	263.273		476.954	377.052	185.533				0				0		380.695	303.321	143.695				0				0				0		549.348	372.99	327.522				0		537.23
			0				0		578.286	450.38	237.539		448.981	382.799	122.91				0				0		376.958	298.611	145.502				0				0				0		544.641	370.969	322.534						526.298
			0				0				0		432.318	361.408	131.691				0				0		336.68	285.835	94.4261				0				0				0		556.087	380.801	325.53						517.85
			0				0				0		442.368	353.804	164.476				0				0				0				0				0				0		538.13	368.613	314.818						477.359
			0				0				0		394.276	320.694	136.653				0				0				0				0				0				0		570.208	393.006	329.089
			0				0				0				0				0				0				0				0				0				0		535.371	368.264	310.342
			0				0				0				0				0				0				0				0				0				0		533.83	368.887	306.323
			0				0				0				0				0				0				0				0				0				0		559.505	388.968	316.712
			0				0				0				0				0				0				0				0				0				0		545.884	384.89	298.988
			0				0				0				0				0				0				0				0				0				0		541.782	368.984	320.909
			0				0				0				0				0				0				0				0				0				0		502.102	346.356	289.242
			0				0				0				0				0				0				0				0				0				0		494.557	346.387	275.172
			0				0				0				0				0				0				0				0				0				0		531.238	365.368	308.045
																																									542.642	377.12	307.397
																																									542.811	367.072	326.371
																																									509.457	350.9	294.463
																																									509.107	350.957	293.708
																																									510.349	358.62	281.782
																																									451.426	316.877	249.876
																																									425.602	290.525	250.857
																																									442.3	299.347	265.484
																																									389.981	282.942	198.786
																																									376.784	274.552	189.861
																																									337.469	237.86	184.989
																																									288.21	206.793	151.202
	-bkg roll ball 50, select slide, NO PROJ, measure on structure line scan 6pixel and bkg 13 pix				-bkg roll ball 50, select slide, NO PROJ, measure on structure line scan 6pixel and bkg 13 pix				-bkg roll ball 50, select slide, NO PROJ, measure on structure line scan 6pixel and bkg 13 pix				-bkg roll ball 50, select slide, NO PROJ, measure on structure line scan 6pixel and bkg 13 pix				-bkg roll ball 50, select slide, NO PROJ, measure on structure line scan 6pixel and bkg 13 pix				-bkg roll ball 50, select slide, NO PROJ, measure on structure line scan 6pixel and bkg 13 pix				-bkg roll ball 50, select slide, NO PROJ, measure on structure line scan 6pixel and bkg 13 pix				-bkg roll ball 50, select slide, NO PROJ, measure on structure line scan 6pixel and bkg 13 pix				-bkg roll ball 50, select slide, NO PROJ, measure on structure line scan 6pixel and bkg 13 pix				-bkg roll ball 50, select slide, NO PROJ, measure on structure line scan 6pixel and bkg 13 pix				-bkg roll ball 50, select slide, NO PROJ, measure on structure line scan 6pixel and bkg 13 pix				-bkg roll ball 50, select slide, NO PROJ, measure on structure line scan 6pixel and bkg 13 pix				-bkg roll ball 50, select slide, NO PROJ, measure on structure line scan 6pixel and bkg 13 pix
	ROI 19				ROI 18				ROI 17 TILTED				ROI 16 TILTED				ROI 14				ROI 12 TILTED				ROI 11				ROI 10 TILTED				ROI 9				ROI 8 TILTED				ROI 7 TILTED				ROI 7				ROI 5
	1 slide				1 slide				1 slide				1 slide				1 slide				1 slide				1 slide				1 slide				1 slide				1 slide				1 slide				1 slide				1 slide
			779.831				466.439				553.546				538.679				500.987				488.094				429.299				892.317				684.025				346.135				730.547				497.138
			779.308				466.593				555.634				528.483				497.154				484.572				414.069				889.545				669.777				338.498				733.575				510.176
			777.364				452.669				542.123				522.397				495.707				477.632				412.69				860.074				662.312				327.57				721.841				453.275
	999.346	786.238	395.772		484.903	344.459	260.825		736.929	646.507	167.928		725.479	538.162	347.875		881.968	679.337	376.315		643.636	463.058	335.359		596.052	450.234	270.805		922.109	695.924	420.057		897.134	673.496	415.328		808.532	696.731	207.631		772.88	549.207	415.394		729.62	576.439	284.479		1002.9
	1123.02	821.976	559.091		588.368	397.218	354.992		885.75	739.46	271.683		781.386	571.695	389.426		816.87	620.047	365.529		670.871	473.437	366.663		653.706	501.167	283.286		1152.09	846.324	567.852		1068.41	764.353	564.674		918.681	752.277	309.037		821.603	567.666	471.597		840.381	631.888	387.202		1113.33
	1219.19	846.459	692.206		624.257	409.507	398.822		1047.2	821.545	419.065		843.246	606.524	439.627		824.457	603.957	409.5		750.743	505.294	455.835		745.333	537.79	385.437		1411.89	985.837	791.239		1163.06	806.427	662.312		965.385	764.896	372.337		929.27	639.026	539.023		911.643	693.911	404.359		1289.58
	1335.89	917.306	777.364		636.443	432.155	379.393		1121.62	858.737	488.219		881.208	624.051	477.579		899.152	632.232	495.707		798.634	528.284	502.079		793.529	571.312	412.69		1528.97	1049.99	889.545		1219.92	832.231	719.985		865.717	700.348	307.113		1046.98	691.536	660.107		950.247	711.61	443.183		1303.23
	1333.2	911.684	782.821		646.803	430.302	402.072		1150.24	869.819	520.778		906.828	658.446	461.281		874.347	612.081	487.066		772.001	511.077	484.572		810.265	561.96	461.138		1559.38	1060.04	927.331		1152.15	791.497	669.777		841.48	684.902	290.786		1117.17	720.745	736.225		996.147	711.859	527.964		1216.87
	1301.42	881.795	779.308		648.248	429.899	405.505		1113.12	813.935	555.634		941.208	669.795	504.053		865.655	590.987	510.099		751.593	494.407	477.632		792.268	575.456	402.651		1486	1022.88	860.074		1159.42	807.52	653.524		789.596	631.697	293.242		1123.59	728.585	733.575		962.883	688.173	510.176		1182.76
	1305.87	892.105	768.429		701.692	450.449	466.593		1045	767.356	515.626		921.882	663.978	478.964		821.574	567.255	472.308		723.394	491.168	431.279		763.022	540.062	414.069		1402.44	968.982	805		1120.07	783.656	624.769		738.367	578.623	296.667		1104.4	715.718	721.841		893.776	649.705	453.275		1109.17
	1239.41	835.058	750.941		683.455	446.688	439.709		1082.49	779.398	562.881		940.967	665.579	511.434		838.837	571.139	497.154		693.301	484.443	387.878		722.775	525.172	366.977		1341.92	955.648	717.355		1105.17	770.61	621.333		761.439	585.055	327.57		1083.37	701.18	709.789		872.216	638.292	434.43		1106.81
	1220.24	854.056	680.061		671.549	445.426	419.943		1027.58	735.672	542.123		960.025	678.735	522.397		840.596	574.703	493.802		658.553	455.892	376.371		673.693	490.653	339.93		1332.99	943.536	723.265		1084.25	786.441	553.073		739.803	586.131	285.391		1014.33	662.152	654.045		860.367	643.785	402.225		1129.44
	1152.09	830.139	597.914		722.933	464.442	480.055		965.029	687.564	515.293		965.289	693.708	504.365		852.476	594.14	479.767		656.754	453.993	376.555		703.273	500.929	375.783		1270.23	924.423	642.206		1018.82	764.228	472.813		745.805	574.914	317.37		971.11	644.646	606.29		833.649	598.267	437.137		1110.1
	1149.7	823.781	605.276		672.07	438.436	433.891		891.625	663.402	423.843		998.706	694.391	565.158		837.104	589.676	459.509		628.894	448.083	335.793		680.706	484.366	364.631		1220.61	925.04	548.92		1064.43	770.678	545.535		731.357	557.158	323.512		960.389	636.817	600.919		840.255	602.692	441.188		1039.69
	1150.42	815.556	621.887		664.989	446.859	405.099		860.554	644.659	400.948		969.178	688.137	521.932		760.483	537.043	414.96		558.047	406.916	280.671		658.191	477.899	334.828		1147.27	881.412	493.731		1034.36	752.365	523.712		714.723	560.422	286.558		910.693	621.651	536.792		845.078	623.743	411.051		1100.72
	1159.52	837.084	598.801		682.248	441.039	447.959		819.332	633.193	345.686		949.341	664.774	528.483		802.573	567.403	436.744		566.465	411.207	288.336		650.67	457.983	357.847		1143.35	881.392	486.501		960.425	734.869	418.89		726.063	543.795	338.498		854.552	603.425	466.38		805.268	612.084	358.771		998.723
	1181.35	835.747	641.824		664.204	434.065	427.402		729.099	579.462	277.898		904.144	660.568	452.354		796.698	568.468	423.856		525.7	379.565	271.392		618.286	444.402	322.927		1074.9	839.44	437.29		1003.5	767.427	438.426		707.262	543.014	305.033		808.126	569.367	443.409		799.34	599.767	370.636		993.355
	1121.35	843.785	515.486		683.289	439.544	452.669		667.293	544.595	227.868		898.376	665.921	431.703		782.615	569.525	395.739		516.423	384.34	245.297		613.994	429.642	342.369				0		1038.43	776.796	485.899		688.519	534.379	286.26		847.453	588.959	480.06		842.128	620.811	411.016		980.353
	1100.31	819.375	521.73		686.229	445.404	447.246		619.087	515.487	192.401		854.607	635.573	406.777		814.649	580.882	434.139		492.235	368.92	229.013		587.136	419.526	311.276				0		1041.46	768.798	506.377		713.719	558.203	288.815		765.796	549.275	402.11		729.891	559.66	316.143		914.728
	1067.88	795.178	506.453		679.224	453.535	419.137		569.336	458.163	206.465		753.724	568.479	344.025		747.301	557.659	352.192		503.229	378.222	232.157		589.692	421.547	312.271				0		1035.64	769.719	493.856		684.85	532.641	282.674		770.494	548.93	411.475		681.22	518.41	302.361		836.53
	995.122	761.371	434.11		674.521	441.551	432.66		524.371	433.175	169.364				0		706.734	537.91	313.53		455.517	357.381	182.253		587.578	408.758	332.095				0		969.061	732.257	439.778		608.609	500.447	200.872		784.86	557.988	421.333		677.688	523.893	285.62		751.878
	1015.06	750.141	491.992		652.371	446.286	382.729				0				0		701.07	532.857	312.395		427.007	339.437	162.63		548.072	393.531	287.005				0		909.019	706.77	375.604		677.648	518.199	296.12		737.741	526.63	392.064		687.6	510.127	329.593		797.611
	949.656	739.306	390.65		632.184	438.411	359.865				0				0		688.731	513.032	326.298		372.448	312.442	111.438		549.805	399.285	279.538				0		912.228	691.529	409.868		610.251	481.337	239.411		657.664	477.531	334.533		712.474	525.668	346.924		804.1
	930.216	734.847	362.827		649.413	440.672	387.662				0				0		679.875	498.413	337.002		380.258	327.888	97.2576		551.458	395.714	289.239				0		852.737	666.831	345.255				0		635.232	453.351	337.78		672.044	508.394	303.923		751.815
	928.027	713.425	398.548		627.684	427.057	372.594				0				0		679.812	509.216	316.821		365.514	310.673	101.847		522.208	397.787	231.067				0		829.677	663.962	307.757				0		550.449	410.276	260.321		661.825	502.675	295.564		710.254
	931.678	700.619	429.109		596.924	412.332	342.813				0				0		651.652	495.154	290.639		305.139	278.346	49.7586		492.559	367.986	231.35				0		821.793	634.135	348.507				0		509.654	408.482	187.89		636.908	483.253	285.359		731.699
	943.992	706.926	440.266		537.285	381.812	288.735				0				0		607.349	477.745	240.693				0		497.801	372.916	231.93				0		779.834	616.415	303.491				0		497.221	405.2	170.896		600.695	495.053	196.192		705.357
	886.101	671.188	399.123		525.835	366.331	296.221				0				0		535.624	433.341	189.954				0		476.3	345.5	242.915				0		754.411	590.188	304.986				0		452.978	370.469	153.231		534.716	447.887	161.252		691.45
	870.513	641.864	424.634		512.947	362.247	279.872				0				0		488.437	411.818	142.293				0		424.265	316.926	199.343				0		732.055	572.534	296.252				0				0		526.006	444.48	151.406		643.104
	837.053	625.492	392.898		502.336	362.461	259.768				0				0		470.073	388.228	151.998				0		407.551	323.782	155.57				0		723.277	567.554	289.2				0				0		549.434	449.887	184.873		632.365
	801.611	612.186	351.788		500.25	357.103	265.843				0				0		422.5	383.308	72.7835				0		358.644	304.059	101.373				0		703.751	555.866	274.644				0				0		493.589	424.296	128.687		590.322
	693.068	541.201	282.04		451.976	324.557	236.636				0				0		403.315	352.261	94.8149				0		346.388	292.777	99.5624				0		667.547	532.955	249.956				0				0		494.398	413.274	150.66		513.925
	703.284	547.628	289.077		477.519	336.477	261.933				0				0				0				0		347.166	300.918	85.888				0		611.236	483.944	236.4				0				0		441.546	371.155	130.727		481.544
	648.25	511.476	254.009		445.722	308.889	254.119				0				0				0				0		335.933	292.826	80.0564				0		586.051	472.506	210.871				0				0		443.636	376.75	124.215		479.336
	599.278	467.957	243.883		436.65	308.599	237.809				0				0				0				0				0				0		535.812	439.813	178.285				0				0		414.403	365.151	91.4686		455.567
	520.016	422.781	180.579		464.533	332.286	245.601				0				0				0				0				0				0		525.187	419.596	196.097				0				0		438.572	387.314	95.1944		453.854
	497.397	416.076	151.025		393.314	299.462	174.298				0				0				0				0				0				0		521.349	431.089	167.625				0				0		415.124	359.254	103.758		385.551
	465.265	384.132	150.675		401.413	293.844	199.77				0				0				0				0				0				0		506.461	429.797	142.376				0				0		429.981	378.59	95.4406
	448.101	366.175	152.147		386.025	294.225	170.486				0				0				0				0				0				0		424.385	368.161	104.417				0				0		401.189	367.969	61.6956
	418.361	351.127	124.864		373.008	287.256	159.254				0				0				0				0				0				0		455.851	368.301	162.593				0				0		422.844	374.675	89.4569
	391.018	331.034	111.399		340.164	262.827	143.626				0				0				0				0				0				0		422.299	352.917	128.851				0				0		413.552	360.576	98.3844
	377.233	322.266	102.08		339.896	272.194	125.732				0				0				0				0				0				0		372.702	338.372	63.7565				0				0		417.292	375.188	78.1924
	362.407	303.313	109.746		302.139	254.325	88.7984				0				0				0				0				0				0		383.598	330.402	98.7929				0				0		394.233	351.415	79.519
			0				0				0				0				0				0				0				0		339.128	295.928	80.228				0				0		420.368	380.381	74.2629
			0				0				0				0				0				0				0				0		319.295	279.286	74.3032				0				0		419.321	379.45	74.0456
			0				0				0				0				0				0				0				0				0				0				0		434.683	394.248	75.0941
			0				0				0				0				0				0				0				0				0				0				0		429.247	383.418	85.1106
			0				0				0				0				0				0				0				0				0				0				0		430.192	386.992	80.2295
			0				0				0				0				0				0				0				0				0				0				0		450.121	398.621	95.6434
			0				0				0				0				0				0				0				0				0				0				0		437.102	411.812	46.9662

## Sheet: haploid Y10626 4d
	-bkg roll ball 50, select slide, NO PROJ, measure on structure line scan 6pixel and bkg 13 pix				-bkg roll ball 50, select slide, NO PROJ, measure on structure line scan 6pixel and bkg 13 pix				-bkg roll ball 50, select slide, NO PROJ, measure on structure line scan 6pixel and bkg 13 pix				-bkg roll ball 50, select slide, NO PROJ, measure on structure line scan 6pixel and bkg 13 pix				-bkg roll ball 50, select slide, NO PROJ, measure on structure line scan 6pixel and bkg 13 pix				-bkg roll ball 50, select slide, NO PROJ, measure on structure line scan 6pixel and bkg 13 pix				-bkg roll ball 50, select slide, NO PROJ, measure on structure line scan 6pixel and bkg 13 pix				-bkg roll ball 50, select slide, NO PROJ, measure on structure line scan 6pixel and bkg 13 pix				-bkg roll ball 50, select slide, NO PROJ, measure on structure line scan 6pixel and bkg 13 pix				-bkg roll ball 50, select slide, NO PROJ, measure on structure line scan 6pixel and bkg 13 pix				-bkg roll ball 50, select slide, NO PROJ, measure on structure line scan 6pixel and bkg 13 pix				-bkg roll ball 50, select slide, NO PROJ, measure on structure line scan 6pixel and bkg 13 pix				-bkg roll ball 50, select slide, NO PROJ, measure on structure line scan 6pixel and bkg 13 pix
	ROI 33				ROI 31				ROI 30				ROI 29 TILTED				ROI 28				ROI 27				ROI 25				ROI 24				ROI 22				ROI 21				ROI 18 TILTED				ROI 18 TILTED				ROI 16 TILTED
	1 slide				1 slide				1 slide				1 slide				1 slide				1 slide				1 slide				1 slide				1 slide				1 slide				1 slide				1 slide				1 slide
			565.537				437.498				407.536				506.689				476.655				389.413				508.697				497.237				437.595				420.047				512.737				385.888
			562.647				442.915				402.713				502.72				475.911				392.78				510.486				478.798				437.833				427.795				500.231				382.139
			556.351				405.521				387.423				497.191				468.443				381.622				504.325				471.942				431.7				402.036				499.512				379.452
	762.413	589.959	320.272		528.076	410.386	218.567		679.497	538.468	261.911		483.731	354.359	240.261		687.351	492.232	362.363		577.198	444.351	246.716		650.434	469.105	336.755		651.357	497.739	285.292		444.615	326.384	219.572		272.912	189.634	154.659		585.288	442.022	266.067		497.202	376.516	224.132		357.702
	800.22	599.419	372.915		585.995	435.289	279.882		724.135	581.637	264.64		608.033	406.637	374.022		712.714	511.877	372.983		556.38	414.459	263.567		699.186	499.399	371.033		746.755	532.651	397.622		542.514	383.974	294.431		328.556	229.748	183.5		631.388	476.033	288.517		555.882	408.329	274.027		505.774
	854.207	595.376	480.687		656.996	458.064	369.446		716.412	561.221	288.211		683.374	459.909	415.006		799.043	554.215	454.68		641.399	452.508	350.798		832.067	571.907	483.155		860.703	602.889	478.798		629.951	438.343	355.844		376.664	262.962	211.16		730.236	532.611	367.017		612.646	449.103	303.723		662.371
	902.949	599.985	562.647		714.246	495.889	405.521		809.75	604.181	381.772		757.327	486.631	502.72		801.199	544.939	475.911		647.939	471.01	328.582		876.315	601.011	511.279		914.038	622.746	540.971		718.75	486.296	431.7		448.799	297.619	280.764		852.185	637.036	399.562		692.737	509.116	341.01		850.049
	927.375	616.353	577.611		773.91	535.417	442.915		863.486	630.617	432.471		766.798	499.08	497.191		767.63	518.887	461.951		628.163	461.462	309.588		879.747	604.869	510.486		827.857	573.735	471.942		724.519	485.846	443.251		537.695	343.28	361.056		1003.96	735.283	498.98		736.182	522.912	396.072		958.681
	902.697	607.874	547.528		763.967	514.09	464.058		820.233	603.388	402.713		774.997	494.913	520.156		768.597	507.114	485.61		605.085	431.821	321.775		847.973	576.413	504.325		789.82	561.829	423.413		707.633	471.877	437.833		591.973	375.492	402.036		1039.83	749.888	538.468		714.904	511.38	377.974		966.21
	896.664	604.061	543.405		712.142	505.848	383.117		794.948	586.336	387.423		753.442	487.122	494.594		752.153	499.914	468.443		628.192	431.901	364.54		800.797	570.431	427.822		797.556	568.213	425.921		667.049	450.343	402.454		641.236	409.53	430.31		992.031	722.676	500.231		701.791	497.47	379.452		973.342
	843.515	582.129	485.431		684.139	488.89	362.604		750.971	567.502	340.729		728.148	468.115	482.919		762.57	517.373	455.365		630.3	424.811	381.622		741.657	541.166	372.341		758.786	550.109	387.544		641.556	435.708	382.289		631.907	401.556	427.795		959.991	691.023	499.512		710.956	505.188	382.139		983.264
	846.813	547.239	556.351		673.313	486.942	346.118		682.829	521.651	299.33		683.768	456.415	422.226		698.701	463.587	436.64		638.38	437.358	373.327		713.581	516.279	366.418		748.414	549.184	369.999		607.528	411.775	363.542		592.4	380.098	394.275		922.357	655.995	494.672		705.599	510.763	361.838		948.286
	792.736	505.648	533.164		650.172	478.575	318.678		669.692	498.267	318.361		655.819	443.442	394.414		661.5	450.39	392.061		655.795	443.728	393.838		683.763	511.819	319.325		713.006	523.222	352.456		633.431	422.262	392.171		559.609	360.827	369.168		871.221	635.669	437.454		675.139	494.999	334.546		869.862
	748.226	510.356	441.76		675.349	500.131	325.404		662.72	496.224	309.206		625.119	431.402	359.759		637.056	436.712	372.066		656.459	444.962	392.78		676.085	512.363	304.055		656.746	479.287	329.567		604.791	405.775	369.6		515.973	350.93	306.508		865.856	615.85	464.296		680.97	487.972	358.425		828.02
	728.347	509.249	406.896		673.726	488.742	343.541		610.463	470.794	259.386		566.861	405.789	299.135		630.702	441.659	351.082		616.265	424.911	355.372		650.63	484.184	309.114		666.86	493.868	321.271		613.062	415.819	366.307		464.173	314.828	277.355		838.423	591.135	459.248		683.452	485.572	367.49		763.434
	683.007	498.25	343.12		655.673	485.462	316.106		551.282	440.326	206.062		568.039	430.352	255.705		607.739	422.542	343.938		573.258	404.686	313.061		644.773	474.334	316.531		641.92	463.986	330.45		606.763	409.765	365.854		424.2	292.545	244.5		819.015	592.408	420.842		648.865	475.8	321.406		717.694
	675.223	477.056	368.024		613.803	461.258	283.298		591.18	445.605	270.353		556.706	414.688	263.747		606.696	422.607	341.88		578.952	398.836	334.502		627.486	472.646	287.562		597.91	446.811	280.612		585.987	405.79	334.652		367.863	259.071	202.042		783.453	555.642	423.078		636.381	493.364	265.604		692.905
	649.499	463.221	345.944		596.33	450.982	269.931		555.094	421.218	248.626		556.084	421.828	249.332		558.354	397.212	299.264		569.69	400.592	314.04		613.185	475.764	255.211		559.527	431.442	237.87		559.67	396.258	303.48		362.777	259.542	191.722		714.577	519.271	362.711		635.963	484.739	280.845
	620.544	454.51	308.348		603.901	454.639	277.2		574.045	417.681	290.391						532.921	372.712	297.532		573.845	403.481	316.39		661	504.516	290.614		566.468	439.137	236.472		577.013	388.354	350.367		338.268	238.271	185.709		701.948	514.328	348.438		631.79	488.602	265.922
	609.362	454.632	287.356		585.83	449.377	253.413		560.736	412.123	275.996						543.802	389.891	285.835		523.05	382.418	261.174		628.649	491.216	255.233		552.25	425.554	235.293		550.145	372.825	329.309		347.983	238.763	202.838		651.206	484.835	308.975		574.903	455.252	222.21
	588.598	444.137	268.284		554.464	422.653	244.791		526.742	397.708	239.634						550.728	393.984	291.095		515.833	384.971	243.03		625	478.951	271.235		529.326	402.04	236.388		541.104	364.577	327.836		350.144	247.815	190.039		618.903	472.68	271.557		589.785	445.052	268.79
	570.754	429.982	261.434		529.581	396.885	246.435		528.744	396.767	245.099						525.191	380.228	269.217		485.298	369.765	214.561		605.544	461.802	266.95		542.656	409.313	247.637		534.688	359.059	326.168		371.498	257.176	212.313		619.805	471.822	274.825		577.013	451.091	233.854
	591.2	424.918	308.81		483.023	369.812	210.248		529.446	408.982	223.719						524.208	379.692	268.388		449.743	347.733	189.448		545.201	434.217	206.114		518.673	397.756	224.561		519.31	357.646	300.232		365.747	255.112	205.463		594.39	455.76	257.457		566.155	440.547	233.273
	553.889	403.142	279.958		493.209	385.026	200.911		498.85	379.832	221.033						475.265	369.247	196.89		425.248	336.505	164.808		575.712	462.63	210.01		501.092	383.88	217.679		557.572	380.466	328.911		368.395	252.207	215.776		553.057	406.945	271.351		538.098	431.427	198.104
	513.132	403.444	203.705		489.684	388.839	187.284		491.872	365.944	233.866						518.064	389.589	238.596		425.112	329.078	178.35		542.236	431.157	206.289		495.005	375.929	221.14		514.341	354.962	295.991		351.685	241.625	204.397		509.188	388.486	224.161		485.147	386.148	183.855
	506.143	390.244	215.242		453.583	362.03	170.027		469.617	367.882	188.935						440.201	342.291	181.834		365.138	297.555	125.51		557.695	435.711	226.542		456.215	350.522	196.287		552.016	377.002	325.025		320.218	222.461	181.549		489.98	390.511	184.728		473.164	392.391	150.006
	466.343	365.356	187.546		411.059	338.423	134.895		464.021	377.313	161.03						449.466	332.902	216.477						506.129	393.843	208.531		413.276	335.658	144.148		528.975	370.932	293.508		315.621	226.275	165.928		494.73	392.579	189.709		437.092	367.99	128.334
	500.103	373.266	235.554		391.603	331.09	112.381		473.143	371.681	188.429						404.642	315.275	165.966						470.916	383.857	161.681		404.544	327.608	142.88		467.496	328.039	258.991		290.07	214.008	141.259		443.554	344.596	183.78
	433.806	339.931	174.339		387.89	326.405	114.186		458.634	360.114	182.966						393.034	319.839	135.933						439.656	366.223	136.375		387.175	310.049	143.234		437.347	304.453	246.803		295.848	212.252	155.249
	401.626	340.252	113.982		355.603	303.88	96.0576		472.897	361.805	206.314						415.299	308.482	198.374						386.604	320.962	121.907		377.332	298.757	145.924		385.673	270.491	213.91		294.409	213.268	150.692
	430.488	325.705	194.597		342.899	271.278	133.012		474.147	360.903	210.312						399.955	302.516	180.959						340.63	297.185	80.6825		343.43	287.054	104.699		292.376	228.759	118.145		284.006	198.084	159.569
	369.87	301.512	126.951		307.288	259.393	88.9477		439.627	353.124	160.647						325.825	268.954	105.617						302.887	266.262	68.0188		302.906	270.253	60.6409		258.284	207.659	94.018		258.471	180.382	145.021
	336.586	279.953	105.176		298.568	258.616	74.1975		406.186	335.293	131.659						304.231	250.5	99.7863						280.646	255.119	47.4082						216.356	181.622	64.506		274.994	187.324	162.816
					278.118	232.257	85.1714		367.662	315.745	96.4173						288.572	237.127	95.5407																		259.783	188.297	132.759
									346.771	294.638	96.8184						255.726	215.895	73.9706																		267.19	191.907	139.812
									326.423	289.902	67.8236						224.056	196.88	50.4706																		238.073	179.676	108.453
									310.741	285.635	46.6247						200.035	166.847	61.6343																		233.913	184.863	91.093
	-bkg roll ball 50, select slide, NO PROJ, measure on structure line scan 6pixel and bkg 13 pix				-bkg roll ball 50, select slide, NO PROJ, measure on structure line scan 6pixel and bkg 13 pix				-bkg roll ball 50, select slide, NO PROJ, measure on structure line scan 6pixel and bkg 13 pix				-bkg roll ball 50, select slide, NO PROJ, measure on structure line scan 6pixel and bkg 13 pix				-bkg roll ball 50, select slide, NO PROJ, measure on structure line scan 6pixel and bkg 13 pix				-bkg roll ball 50, select slide, NO PROJ, measure on structure line scan 6pixel and bkg 13 pix				-bkg roll ball 50, select slide, NO PROJ, measure on structure line scan 6pixel and bkg 13 pix				-bkg roll ball 50, select slide, NO PROJ, measure on structure line scan 6pixel and bkg 13 pix				-bkg roll ball 50, select slide, NO PROJ, measure on structure line scan 6pixel and bkg 13 pix				-bkg roll ball 50, select slide, NO PROJ, measure on structure line scan 6pixel and bkg 13 pix				-bkg roll ball 50, select slide, NO PROJ, measure on structure line scan 6pixel and bkg 13 pix
	ROI 14				ROI 13 TILTED				ROI 12				ROI 10 TILTED				ROI 9				ROI 8 TILTED				ROI 7				ROI 5				ROI 4				ROI 3 TILTED				ROI 1
	1 slide				1 slide				1 slide				1 slide				1 slide				1 slide				1 slide				1 slide				1 slide				1 slide				1 slide
			533.681				706.648				515.176				734.508				346.757				470.6				504.426				432.185				383.382				414.632				272.578
			530.827				718.031				503.108				720.965				348.344				461.04				497.871				415.933				381.354				415.158				266.055
			530.25				665.638				501.332				716.759				340.3				455.472				482.322				406.175				379.841				408.169				255.887
	571.847	434.833	254.455		387.918	339.743	89.4695		664.835	526.581	256.757		536.389	444.923	169.865		346.184	292.252	100.159		598.492	492.698	196.475		230.766	146.553	156.396		434.364	346.814	162.593		424.517	349.118	140.026		471.905	379.008	172.522		248.148	182.812	121.339
	676.911	492.034	343.342		503.408	395.641	200.14		726.624	527.451	369.893		636.418	508.789	237.026		370.21	314.301	103.83		678.063	550.526	236.855		348.414	222.025	234.723		546.773	417.908	239.32		578.26	428.77	277.624		559.203	421.003	256.658		309.028	217.95	169.145
	785.812	561.381	416.801		690.533	499.473	354.826		839.527	568.622	503.108		808.251	627.522	335.641		395.265	337.173	107.885		682.412	545.993	253.351		475.734	287.539	349.506		676.795	489.227	348.341		634.093	486.692	273.746		616.567	464.707	282.026		393.475	280.398	210.001
	850.525	598.979	467.158		898.769	595.919	562.437		899.343	630.38	499.504		1078.37	771.697	569.534		539.032	428.408	205.445		813.609	607.016	383.673		601.866	347.194	472.963		743.988	525.279	406.175		743.928	534.493	388.951		652.939	489.638	303.275		466.528	328.742	255.887
	853.29	590.141	488.705		1075.74	689.107	718.031		899.064	607.709	541.087		1258.49	892.036	680.56		672.188	511.785	297.893		844.352	618.241	419.92		664.341	396.256	497.871		823.339	567.867	474.447		783.271	577.926	381.354		723.596	521.756	374.847		480.944	321.672	295.791
	857.519	605.446	468.136		1116.59	720.134	736.274		861.846	591.898	501.332		1347.73	935.375	765.8		704.213	547.303	291.404		939.198	672.505	495.286		709.166	422.12	533.086		788.326	564.362	415.933		750.325	554.336	363.98		790.299	570.516	408.169		492.255	348.994	266.055
	910.131	619.381	539.964		1107.54	749.115	665.638		854.712	592.532	486.906		1319.52	931.307	720.965		732.782	550.82	337.929		900.153	651.901	461.04		681.854	422.142	482.322		746.09	538.013	386.429		719.094	530.807	349.676		786.447	562.9	415.158		465.071	347.317	218.685
	884.519	616.646	497.478		1009.96	678.562	615.454		821.091	567.117	471.665		1277.6	891.653	716.759		713.945	534.603	333.064		870.311	637.897	431.626		625.8	387.269	442.987		701.351	519.096	338.474		702.049	516.492	344.606		820.342	593.882	420.568		453.962	328.339	233.3
	896.206	623.01	507.365		958.997	669.021	538.527		790.985	558.72	431.349		1180.86	852.887	609.1		710.536	527.297	340.3		898.75	653.496	455.472		544.852	335.818	388.206		652.169	484.453	311.472		724.623	522.448	375.468		802.726	598.828	378.667		450.39	337.824	209.05
	929.893	646.067	527.105		899.633	630.681	499.481		830.525	583.137	459.435		1088.68	760.57	609.344		681.582	494.012	348.344		879.825	644.486	437.059		565.871	346.812	406.824		670.068	495.712	323.803		711.999	507.469	379.841		809.091	602.8	383.112		449.084	341.331	200.114
	930.301	644.782	530.25		862.105	624.511	441.245		819.293	575.492	452.774		1014.99	716.096	555.082		691.277	501.938	351.628		868.086	643.776	416.575		544.567	339.188	381.417		647.178	476.524	316.929		656.58	462.4	360.62		806.542	603.447	377.178		436.053	334.807	188.028
	901.106	627.899	507.385		880.862	635.985	454.771		785.813	561.935	415.773		959.683	681.003	517.548		681.19	498.449	339.376		849.355	626.333	414.185		514.051	320.512	359.43		592.499	435.178	292.168		666.346	469.235	366.063		781.224	573.865	385.095		428.79	319.008	203.88
	851.174	610.817	446.379		837.111	596.222	447.365		804.433	574.764	426.529		886.54	642.094	453.972		637.257	478.391	295.037		778.603	597.403	336.515		483.578	292.763	354.371		542.126	397.986	267.69		621.209	455.562	307.629		782.24	565.761	402.033		435.921	315.629	223.398
	867.149	605.033	486.787		784.139	588.955	362.484		775.653	549.01	420.908		790.493	584.872	381.867		607.23	451.88	288.507		703.819	556.634	273.343		438.683	270.615	312.126		550.202	412.656	255.444		586.821	429.006	293.084		717.114	530.102	347.309		429.63	316.673	209.777
	849.273	602.277	458.706		837.008	606.947	427.256		772.314	543.45	425.033		750.499	559.289	355.105		599.431	454.146	269.815		638.806	509.331	240.453		453.139	287.055	308.44		524.832	397.934	235.668		544.751	406.504	256.744		676.62	512.844	304.154		422.019	313.164	202.16
	883.486	597.656	530.827		822.164	592.524	426.474		742.851	526.615	401.582		718.567	566.026	283.291		572.818	451.017	226.203		607.312	498.355	202.349		419.032	256.511	301.826		498.644	378.875	222.429		513.294	393.545	222.391		667.427	514.523	283.965		439.243	318.058	225.059
	868.611	599.015	500.678		835.724	599.748	438.24		707.58	504.448	377.244		669.443	530.433	258.16		568.545	438.96	240.659		587.348	476.606	205.663		399.096	245.66	284.952		546.416	404.467	263.619		479.685	376.589	191.465		679.533	519.013	298.108		418.202	311.945	197.333
	863.405	589.779	508.162		831.854	605.263	420.812		640.538	472.13	312.759		630.02	525.057	194.932		549.59	438.173	206.919		564.939	478.836	159.906		415.474	255.396	297.288		513.609	387.51	234.183		447.654	347.772	185.496		623.81	475.394	275.629		422.504	319.154	191.936
	854.539	574.818	519.482		808.786	596.178	394.844		623.775	471.801	282.237		626.559	504.854	226.023		553.333	433.038	223.404		528.601	470.436	108.02		427.742	258.756	313.832		498.016	378.599	221.774		368.346	316.736	95.8468		613.815	461.648	282.596		389.829	296.519	173.289
	849.219	579.733	500.475		772.642	573.67	369.52		623.085	466.06	291.618		547.079	458.395	164.699		498.931	387.091	207.705						462.839	276.43	346.188		464.156	355.664	201.486		323.781	282.168	77.2805		582.167	446.349	252.233		430.933	319.888	206.226
	815.919	573.051	451.041		750.885	574.538	327.502		646.858	474.563	319.976		522.521	440.467	152.387		460.969	382.689	145.377						437.439	269.433	312.011		440.803	338.671	189.674						530.901	420.218	205.554		406.505	289.964	216.434
	789.95	549.04	447.403		716.696	558.129	294.481		626.126	442.277	341.434		506.435	429.847	142.236		459.001	379.029	148.519						407.784	236.443	318.204		408.593	328.186	149.327						540.002	427.26	209.378		383.66	280.853	190.926
	826.814	560.462	494.655		625.925	496.39	240.566		610.576	430.277	334.841						436.271	357.82	145.695						366.503	227.655	257.862		363.326	289.681	136.77						501.056	412.648	164.187		357.577	268.119	166.136
	825.092	574.373	465.621		533.893	442.334	170.038		651.416	456.555	361.884						407.674	339.26	127.055						358.886	224.819	248.981		355.721	296.2	110.538						456.667	377.981	146.13		337.798	249.994	163.066
	818.717	554.815	490.102						595.398	418.849	327.878						392.331	326.112	122.977						328.951	222.19	198.271		337.609	294.254	80.5157						455.055	385.809	128.6		302.651	239.398	117.471
	802.233	553.977	461.047						604.091	426.282	330.217														273.526	186.541	161.544		317.031	277.785	72.8858										281.62	226.874	101.671
	712.275	496.055	401.552						568.861	399.708	314.14														289.334	188.795	186.715		318.421	270.32	89.3304										255.174	203.17	96.5789
	635.957	456.38	333.499						518.126	364.146	285.963														257.464	170.882	160.796		260.264	234.103	48.5845										219.537	177.656	77.7788
	574.347	417.163	291.915						502.981	368.182	250.341														263.49	172.393	169.181		235.719	209.224	49.2052										207.93	184.089	44.278
	555.029	401.935	284.319						456.05	343.617	208.804														279.596	182.969	179.452		206.978	192.61	26.6831
	509.152	379.666	240.475						445.647	326.885	220.558														222.904	151.897	131.871
	498.672	386.159	208.952						401.447	305.483	178.219														206.058	139.324	123.934
	495.994	379.764	215.856						385.399	304.178	150.839
	433.75	327.094	198.077						342.032	277.234	120.34
	363.273	282.169	150.622
	336.727	264.239	134.622
	-bkg roll ball 50, select slide, NO PROJ, measure on structure line scan 6pixel and bkg 13 pix				-bkg roll ball 50, select slide, NO PROJ, measure on structure line scan 6pixel and bkg 13 pix				-bkg roll ball 50, select slide, NO PROJ, measure on structure line scan 6pixel and bkg 13 pix				-bkg roll ball 50, select slide, NO PROJ, measure on structure line scan 6pixel and bkg 13 pix				-bkg roll ball 50, select slide, NO PROJ, measure on structure line scan 6pixel and bkg 13 pix				-bkg roll ball 50, select slide, NO PROJ, measure on structure line scan 6pixel and bkg 13 pix				-bkg roll ball 50, select slide, NO PROJ, measure on structure line scan 6pixel and bkg 13 pix				-bkg roll ball 50, select slide, NO PROJ, measure on structure line scan 6pixel and bkg 13 pix				-bkg roll ball 50, select slide, NO PROJ, measure on structure line scan 6pixel and bkg 13 pix				-bkg roll ball 50, select slide, NO PROJ, measure on structure line scan 6pixel and bkg 13 pix				-bkg roll ball 50, select slide, NO PROJ, measure on structure line scan 6pixel and bkg 13 pix				-bkg roll ball 50, select slide, NO PROJ, measure on structure line scan 6pixel and bkg 13 pix				-bkg roll ball 50, select slide, NO PROJ, measure on structure line scan 6pixel and bkg 13 pix
	ROI 27 TILTED				ROI 24				ROI 23				ROI 21				ROI 20 TILTED				ROI 19 TILTED				ROI 18				ROI 17 TILTED				ROI 16 TILTED				ROI 15				ROI 14 TILTED				ROI 12				ROI 11 TILTED
	1 slide				1 slide				1 slide				1 slide				1 slide				1 slide				1 slide				1 slide				1 slide				1 slide				1 slide				1 slide				1 slide
			965.423				626.244				445.263				793.413				559.828				465.768				677.161				577.058				490.78				583.526				609.58				773.324
			953.971				633.966				443.015				783.714				545.823				465.996				664.628				574.337				499.849				565.747				592.669				774.428
			947.843				588.34				429.038				746.673				544.937				463.047				644.964				562.807				437.785				549.866				585.432				768.699
	930.219	686.608	452.419		948.006	643.529	565.458		629.316	485.64	266.826		1017.45	728.369	536.872		506.797	493.175	25.2987		532.444	404.111	238.333		371.856	252.436	221.78		837.859	618.075	408.17		596.38	408.02	349.811		620.77	454.093	309.544		963.557	712.046	467.091		888.394	582.973	567.21		371.287
	1033.36	725.585	571.592		938.882	649.182	538.014		632.523	464.545	311.958		1090.44	772.138	591.132		686.986	596.45	168.137		647.572	454.912	357.795		486.292	304.542	337.536		971.058	701.16	501.239		694.5	476.3	405.229		728.87	510.533	405.484		879.565	630.126	463.243		961.2	642.724	591.455		407.71
	1230.2	819.562	762.608		966.492	657.518	573.81		654.26	460.983	358.943		1183.6	811.408	691.211		916.461	702.006	398.272		734.356	499.6	435.975		610.652	373.589	440.26		1089.85	791.549	553.99		801.353	532.203	499.849		840.68	568.05	506.313		930.866	653.095	515.861		1084.03	702.758	708.068		499.11
	1420.84	910.46	947.843		977.996	666.165	579.115		681.59	456.257	418.476		1250.96	828.959	783.714		1031.59	738.158	544.937		768.672	521.058	459.854		645.697	407.466	442.43		1103.03	783.164	594.03		832.265	544.347	534.705		911.793	607.159	565.747		963.638	648.405	585.432		1157.5	739.196	776.846		557.49
	1472.51	937.038	994.455		1042.29	688.826	656.425		690.289	459.269	429.038		1316.91	859.298	849.851		1047.42	730.416	588.722		784.042	535.745	461.124		720.705	448.24	506.006		1056.99	747.732	574.337		749.66	521.923	422.941		956.489	614.586	634.964		1004.15	653.803	650.639		1178.31	764.392	768.699		656.284
	1367.62	853.947	953.971		1016.8	675.433	633.966		717.162	478.615	443.015		1201.72	804.352	737.972		956.348	662.444	545.823		768.358	516.217	468.262		810.268	492.09	590.902		992.076	689.026	562.807		736.514	500.783	437.785		930.188	634.107	549.866		927.187	608.057	592.669		1135.92	731.726	750.655		681.22
	1211.8	772.93	815.035		975.06	658.261	588.34		690.896	441.192	463.735		1189.15	798.555	725.399		857.633	579.75	516.067		765.709	516.376	463.047		881.69	523.813	664.628		897.909	643.222	472.99		647.436	432.804	398.602		903.709	613.452	539.048		812.181	532.073	520.201		1115.81	698.815	774.428		695.217
	1096.96	715.285	708.821		924.433	641.346	525.732		666.021	435.506	428.099		1198.53	796.473	746.673		770.994	539.032	430.787		756.511	505.591	465.996		896.609	549.321	644.964		814.016	589.931	416.157		627.134	419.617	385.389		840.11	581.205	480.824		746.898	501.11	456.464		1055.64	670.213	715.787		682.6
	918.192	620.753	552.386		893.447	630.202	488.884		615.445	418.789	365.218		1183.29	790.518	729.441		737.135	522.517	398.577		691.54	480.755	391.458		954.588	565.877	721.892		799.443	573.534	419.546		592.779	399.238	359.434		795.118	556.33	443.464		716.484	463.959	468.975		1008.26	641.376	681.353		650.604
	765.778	543.373	413.039		865.21	631.036	434.894		599.059	419.021	334.356		1087.4	737.68	649.474		691.301	486.107	381.075		672.355	459.106	396.035		871.66	549.299	598.67		739.105	539.689	370.344		568.204	394.664	322.29		745.762	539.826	382.452		707.52	466.583	447.455		930.01	591.911	627.897		673.509
	726.922	502.973	415.906		856.434	639.58	402.728		578.898	405.602	321.836		988.013	680.004	572.018		650.878	444.507	383.261		654.523	450.811	378.322		872.02	542.541	611.889		717.845	510.131	385.755		541.753	385.619	289.964		761.736	546.018	400.62		671.12	447.204	415.844		845.341	540.15	566.783		638.862
	623.038	450.878	319.726		811.293	591.686	407.843		581.981	403.345	331.753		936.065	641.051	547.883		577.752	394.266	340.76		618.332	427.222	354.919		890.602	556.96	619.622		649.539	481.854	311.415		600.515	412.893	348.441		801.059	582.131	406.58		677.429	441.238	438.64		835.885	533.356	561.84		656.625
					810.874	605.686	381.063		551.635	400.679	280.346		883.466	611.223	505.594		572.348	405.53	309.804		568.515	403.584	306.3		892.829	546.661	642.883		636.712	465.244	318.44		584.776	414.317	316.566		773.242	562.246	391.849		640.388	428.734	393.071		832.273	539.837	543.094		622.151
					805.661	595.002	391.223		531.136	380.103	280.491		800.843	573.045	423.053		594.295	412.31	337.972		518.252	381.287	254.364		870.831	525.546	641.244		651.368	479.266	319.618		574.788	411.523	303.207		744.146	543.465	372.693		590.066	391.651	368.484		870.115	556.226	582.936		580.89
					745.891	571.216	324.397		518.404	367.911	279.487		783.925	535.613	461.151		569.916	395.838	323.287						862.247	538.172	601.853		661.061	478.45	339.134		559.845	395.643	304.948		747.269	535.306	393.646		585.797	385.448	372.077		836.738	533.377	563.385		549.361
					750.398	578.684	318.897		561.25	386.2	325.093		761.083	518.795	449.963		567.169	388.341	332.11						798.677	508.65	538.621		618.258	453.108	306.707		518.271	373.369	269.104		752.035	530.095	412.174		559.854	376.151	341.162		771.111	505.656	492.987		534.228
					721.158	564.222	291.453		564.903	398.015	309.936		742.017	516.655	418.529		542.637	380.485	301.14						805.544	504.087	559.85		560.798	429.497	243.846						725.164	526.198	369.507		519.845	361.33	294.383		734.709	478.396	476.011		538.123
					772.339	580.87	355.585		534.523	394.665	259.735		684.924	498.616	346.001		568.874	392.569	327.423						772.261	501.29	503.231		478.714	391.372	162.208						685.864	493.952	356.408		506.844	337.525	314.448		682.876	463.019	408.305		544.764
					777.44	604.817	320.586		551.869	391.435	297.949		683.683	478.562	380.94		559.38	380.58	332.058						761.72	486.709	510.735										668	490.548	329.552						660.953	455.034	382.421
					759.538	587.172	320.108		585.171	381.961	377.389		693.311	490.502	376.644		533.193	369.089	304.764						756.865	486.344	502.396										609.178	467.134	263.795						603.919	433.622	316.266
					739.757	572.435	310.741		541.812	381.007	298.637		654.092	468.844	344.032										759.785	487.804	505.107										615.28	461.811	285.013						614.184	424.21	352.809
					714.763	549.851	306.265		542.706	382.204	298.076		647.054	479.4	311.359										749.802	491.313	480.051										591.854	448.828	265.618						588.525	423.509	306.458
					734.977	559.825	325.283		533.43	382.742	279.849		617.832	452.407	307.22										744.878	488.239	476.615										518.425	415.209	191.687						600.441	424.992	325.834
					725.383	556.995	312.72		561.546	382.879	331.81		554.952	420.295	250.076										769.241	511.138	479.334										473.487	380.258	173.14						600.687	420.574	334.497
					708.807	549.847	295.212		534.432	363.623	317.216		559.424	417.515	263.544										698.887	467.569	429.591										398.331	344.402	100.155						613.644	426.39	347.758
					614.333	492.322	226.592		532.514	381.796	279.904		536.385	404.939	244.115										633.519	428.663	380.446										360.471	311.933	90.1418						601.216	422.997	330.979
					622.107	487.233	250.482		500.81	354.269	272.148		516.247	398.85	218.023										627.226	434.524	357.875										326.143	275.344	94.3403						612.15	421.366	354.313
					561.077	448.21	209.611		534.334	371.939	301.592		505.698	388.712	217.26										584.042	410.162	322.92																		585.35	417.009	312.633
					589.783	456.515	247.498		522.299	364.151	293.704		458.768	359.567	184.23										568.301	394.566	322.651																		589.566	415.33	323.582
					567.58	444.881	227.868		505.864	361.014	269.006		423.292	340.477	153.799										548.077	391.253	291.245																		559.39	410.497	276.514
					562.302	429.264	247.072		508.238	349.192	295.371		415.173	325.75	166.072										491.998	359.815	245.482																		550.181	413.147	254.491
					539.642	394.483	269.582		525.602	373.595	282.299		401.024	314.289	161.08										519.495	372.798	272.437																		537.766	396.085	263.121
					484.985	370.328	212.934		493.843	347.408	271.95		361.495	305.222	104.507										454.112	340.925	210.203																		477.635	369.139	201.492
					437.001	350.34	160.942		452.524	334.042	220.038		366.826	289.874	142.911										455.204	355.695	184.802																		439.121	353.695	158.649
					453.62	353.352	186.212		431.235	315.232	215.434		377.03	296.96	148.701										475.368	350.409	232.068																		428.134	350.188	144.757
					427.639	330.873	179.708		443.261	320.033	228.852		355.633	283.159	134.594										418.244	322.976	176.926																		396.123	335.104	113.321
					417.391	327.385	167.155		474.272	333.152	262.081		303.467	270.437	61.3405										377.314	311.092	122.983
					383.741	306.281	143.856		439.661	321.824	218.84		265.884	223.851	78.0613										385.208	301.725	155.039
					358.531	293.646	120.501		413.301	308.609	194.429		256.049	223.258	60.8959										354.857	288.224	123.746
					338.446	279.665	109.165		366.872	279.026	163.141
					320.917	262.487	108.514		378.105	271.654	197.696
					290.822	238.114	97.8854		353.657	262.967	168.424
									339.502	259.711	148.183
									299.224	229.44	129.6
									260.523	201.702	109.24
	-bkg roll ball 50, select slide, NO PROJ, measure on structure line scan 6pixel and bkg 13 pix				-bkg roll ball 50, select slide, NO PROJ, measure on structure line scan 6pixel and bkg 13 pix				-bkg roll ball 50, select slide, NO PROJ, measure on structure line scan 6pixel and bkg 13 pix				-bkg roll ball 50, select slide, NO PROJ, measure on structure line scan 6pixel and bkg 13 pix				-bkg roll ball 50, select slide, NO PROJ, measure on structure line scan 6pixel and bkg 13 pix
	ROI 7 TILTED				ROI 5				ROI 4				ROI 2				ROI 2
	1 slide				1 slide				1 slide				1 slide				1 slide
			447.846				486.426				452.633				652.559				661.73
			445.37				470.387				448.342				652.57				649.355
			444.976				467.493				443.457				650.113				638.079
	357.371	272.268	158.048		543.667	357.929	344.942		863.239	624.455	443.457		331.786	275.121	105.236		819.178	581.249	441.869
	469.966	329.761	260.381		647.513	424.265	414.603		884.803	643.389	448.342		429.62	328.518	187.761		912.43	618.088	546.634
	548.075	363.437	342.9		710.545	458.818	467.493		895.079	644.101	466.102		516.709	387.702	239.583		1068.46	718.803	649.355
	615.971	387.521	424.264		712.308	471.205	447.764		860.169	659.487	372.693		647.961	467.965	334.278		1128.98	753.269	697.756
	654.947	415.344	444.976		762.24	481.487	521.397		825.44	646.402	332.5		831.625	558.617	507.014		1052.27	708.688	638.079
	650.506	411.718	443.462		712.088	458.803	470.387		836.239	658.448	330.184		910.811	610.236	558.211		1000.13	676.04	601.888
	646.73	414.72	430.875		690.574	443.668	458.541		834.591	651.869	339.34		958.773	640.209	591.619		874.372	613.294	484.86
	673.19	433.375	445.37		658.215	426.037	431.188		816.58	637.162	333.205		955.986	629.092	607.088		842.222	584.676	478.301
	685.266	441.24	453.191		640.304	416.155	416.276		808.447	628.066	334.993		976.964	626.904	650.113		793.447	569.941	415.083
	620.561	399.087	411.309		632.412	415.845	402.195		742.388	581.518	298.759		1014.1	662.717	652.57		710.024	524.381	344.765
	623.13	411.523	392.985		597.841	396.878	373.216		649.612	542.908	198.165		994.849	642.16	654.995		622.861	479.162	266.87
	609.617	415.031	361.373		592.137	395.11	365.906		652.264	558.284	174.534		937.035	608.427	610.271		596.001	467.836	238.02
	540.688	370.821	315.467		542.05	373.678	312.691		655.48	540.108	214.262		889.187	566.607	599.076		608.006	452.622	288.57
	497.246	344.847	283.026		590.022	392.327	367.147		630.198	529.564	186.89		806.181	543.484	487.866		612.041	452.814	295.707
	499.397	346.691	283.596		572.911	393.201	333.748		591.779	484.773	198.725		750.191	512.812	440.848		580.686	438.32	264.394
	450.083	318.211	244.904		542.049	379.108	302.605		598.239	478.264	222.81		688.271	472.442	400.824		559.8	428.793	243.297
	431.442	310.605	224.412		524.434	380.034	268.172		572.72	466.431	197.393		652.653	452.012	372.618		513.323	392.096	225.134
	395.984	290.594	195.724		528.214	385.401	265.225		577.732	479.309	182.786		598.858	423.889	324.941		501.481	390.921	205.326
	374.726	287.866	161.31		496.418	360.099	253.165		567.71	484.169	155.148		578.402	407.625	317.156		447.723	362.549	158.18
	357.263	264.607	172.076		494.437	352.354	263.87		591.381	480.87	205.235		485.592	366.389	221.378		407.183	327.437	148.099
	332.626	277.114	103.094		493.704	353.622	260.151		558.174	460.123	182.094		494.794	364.639	241.718		475.961	378.158	181.634
					461.732	337.776	230.204		535.571	449.292	160.232		448.467	355.134	173.332		453.176	355.202	181.952
					467.575	331.415	252.868		544.027	453.275	168.538		398.036	324.393	136.764		452.097	364.61	162.476
					442.231	304.503	255.78		547.7	453.574	174.807		383.745	303.138	149.699		399.186	339.915	110.076
					373.641	285.491	163.708		510.561	428.585	152.241		379.086	311.157	126.153		392.807	329.725	117.153
					399.996	305.394	175.69		530.155	440.458	166.581						366.943	306.847
					398.595	310.213	164.137		530.316	445.877	156.815						375.542	320.057
					389.584	294.493	176.596		494.753	423.009	133.24						372.562	310.481
					386.097	294.326	170.432		467.641	396.253	132.578						337.352	293.089
					333.318	267.072	123.028		457.656	384.566	135.74
					356.72	277.284	147.523		427.548	353.77	137.016
					323.588	254.701	127.933		398.792	322.887	140.966
					288.347	244.644	81.1633		405.186	320.982	156.379
					235.007	205.754	54.327
[truncated: 5 more columns]

## Sheet: diploid 4d homo Y12245
	-bkg roll ball 50, select slide, NO PROJ, measure on structure line scan 6pixel and bkg 13 pix				-bkg roll ball 50, select slide, NO PROJ, measure on structure line scan 6pixel and bkg 13 pix				-bkg roll ball 50, select slide, NO PROJ, measure on structure line scan 6pixel and bkg 13 pix				-bkg roll ball 50, select slide, NO PROJ, measure on structure line scan 6pixel and bkg 13 pix				-bkg roll ball 50, select slide, NO PROJ, measure on structure line scan 6pixel and bkg 13 pix				-bkg roll ball 50, select slide, NO PROJ, measure on structure line scan 6pixel and bkg 13 pix				-bkg roll ball 50, select slide, NO PROJ, measure on structure line scan 6pixel and bkg 13 pix				-bkg roll ball 50, select slide, NO PROJ, measure on structure line scan 6pixel and bkg 13 pix				-bkg roll ball 50, select slide, NO PROJ, measure on structure line scan 6pixel and bkg 13 pix				-bkg roll ball 50, select slide, NO PROJ, measure on structure line scan 6pixel and bkg 13 pix				-bkg roll ball 50, select slide, NO PROJ, measure on structure line scan 6pixel and bkg 13 pix				-bkg roll ball 50, select slide, NO PROJ, measure on structure line scan 6pixel and bkg 13 pix				-bkg roll ball 50, select slide, NO PROJ, measure on structure line scan 6pixel and bkg 13 pix
	ROI 26				ROI 25				ROI 24 TILTED				ROI 23 TILTED				ROI 22 TILTED				ROI 21 TILTED				ROI 20 TILTED				ROI 18 TILTED				ROI 17				ROI 16				ROI 15				ROI 14 TILTED				ROI 13 TILTED
	1 slide				1 slide				1 slide				1 slide				1 slide				1 slide				1 slide				1 slide				1 slide				1 slide				1 slide				1 slide				1 slide
			631.562				660.112				545.74				1356.56				907.642				989.449				1260.58				875.219				710.525				571.624				907.555				1217.95
			616.703				657.409				539.965				1349.82				900.932				969.931				1319.25				877.12				732.469				568.104				911.171				1219.51
			612.361				657.192				535.118				1330.87				890.007				960.893				1129.02				837.474				656.042				524.341				871.227				1194.68
	791.714	589.943	374.718		435.212	289.057	271.432		857.538	663.068	361.159		1050.95	825.834	418.073		719.825	547.027	320.91		878.876	684.109	361.71		1040.01	726.887	581.515		1071.8	776.305	548.774		750.299	545.383	380.558		689.96	511.999	330.499		1027.04	768.919	479.369		924.161	680.343	452.804		1024.96
	979.384	730.251	462.677		670.296	411.898	479.882		949.979	725.755	416.415		1405.5	1014.46	726.216		827.44	614.1	396.203		1108.62	805.054	563.773		1360.18	911.606	833.063		1244.89	880.864	676.043		969.143	659.071	575.85		853.177	620.538	432.045		1151.12	823.85	607.796		1077.16	771.551	567.55		1404.84
	1171.48	869.584	560.669		884.387	538.715	641.963		1029.48	772.685	476.901		1709.54	1200.22	945.877		1016.01	725.041	540.367		1324.66	944.574	705.873		1670.97	1094.66	1070.3		1431.44	984.173	830.63		1167.8	767.692	743.066		1003.61	721.276	524.341		1377.85	958.023	779.68		1242.87	852.966	724.1		1768.81
	1295.65	937.241	665.624		977.327	618.854	665.736		1048.73	757.978	539.965		2037.8	1393.15	1197.21		1376.07	940.055	809.734		1526.16	1032.17	917.399		1969.46	1259.1	1319.25		1478.73	988.158	911.062		1219.83	825.426	732.469		1104.3	769.15	622.427		1521.34	1030.71	911.171		1477.97	965.971	950.858		1909.73
	1227.8	898.068	612.361		975.785	621.796	657.409		1014.17	729.883	527.966		2259.08	1532.25	1349.82		1497.61	1012.49	900.932		1596.93	1079.53	960.893		1991.55	1273.54	1333.46		1399.06	926.76	877.12		1139.62	786.364	656.042		1030.45	724.55	568.104		1569.69	1063.4	940.267		1756.7	1139.85	1145.58		1908.04
	1114.34	810.458	564.35		953.881	600.009	657.192		961.631	677.561	527.559		2336.34	1588.42	1389.01		1528.39	1026.55	931.988		1557.32	998.653	1037.52		1826.88	1218.94	1129.02		1316.22	883.404	803.794		1074.01	752.633	596.844		895.535	637.141	479.874		1490.39	1021.26	871.227		1893.96	1237.3	1219.51		1627.39
	1005.49	707.777	552.891		872.303	552.589	593.755		949.329	646.64	562.136		2271.18	1554.56	1330.87		1454.78	975.543	890.007		1467.99	945.72	969.931		1694.61	1123.8	1060.07		1311.1	860.149	837.474		1021.93	722.163	556.714		804.655	590.758	397.236		1405.41	959.514	828.085		1909.4	1241.9	1239.66		1595.88
	997.888	685.307	580.507		845.089	537.906	570.481		926.948	638.808	535.118		2102.32	1487.9	1141.06		1338.75	896.015	822.226		1386.15	877.286	945.037		1551.62	1045.92	939.171		1244.97	836.882	757.881		961.421	680.75	521.246		751.592	546.623	380.656		1368.17	913.749	843.917		1835.05	1191.76	1194.68		1543.35
	944.761	644.433	557.752		843.512	554.235	537.23		908.505	636.615	504.938		1913.24	1406.24	941.565		1248.67	840.702	757.648		1284.87	835.321	834.885		1452.01	956.183	920.825		1256.83	827.97	796.456		916.198	640.585	511.852		711.264	537.583	322.551		1288.83	871.044	775.88		1741.36	1151.77	1094.96		1529.04
	932.942	621.933	577.588		773.639	512.346	485.259		868.164	589.491	517.536		1709.14	1302.13	755.891		1162.36	786.794	697.488		1194.75	786.367	758.434		1411.99	922.062	909.865		1266.43	852.367	768.967		909.028	626.46	524.771		682.686	510.284	320.175		1248.75	826.772	783.681		1631.56	1097.6	991.628		1385.87
	943.276	611.206	616.703		773.635	518.164	474.446		831.721	572.24	481.893		1537.31	1214.93	598.71		1082.57	738.751	638.513		1151.7	753.413	739.682		1256.94	825.413	801.402		1252.93	847.844	752.311		889.703	611.513	516.639		642.785	475.638	310.416		1193.98	811.588	710.154		1580.79	1059.54	968.036		1377.36
	866.271	572.168	546.193		792.469	521.421	503.374		843.572	559.819	526.968		1426.36	1151.33	510.779		1108.23	733.479	695.964		1060.73	712.661	646.415		1187.64	781.923	753.482		1209.33	818.026	726.702		928.251	607.022	596.568		602.066	458.306	266.982		1160.91	786.016	696.24		1496.27	1018.63	887.055		1274.4
	831.848	561.307	502.433		753.566	507.463	457.049		788.712	550.366	442.641		1292.72	1077.79	399.142		1104.23	730.432	694.202		993.544	693.418	557.377		1112.62	720.821	727.635		1149.48	793.159	661.745		917.268	608.636	573.174		598.611	459.826	257.743		1064.27	738.32	605.328		1434.43	995.883	814.451		1272.15
	813.715	553.99	482.346		744.91	488.984	475.29		745.417	515.139	427.659		1207.44	1028.92	331.538		1052.46	701.63	651.536		977.534	680.852	550.981		1008.14	682.381	604.976		1093.78	754.979	629.2		907.143	599.45	571.43		581.061	445.663	251.455		977.323	695.442	523.493		1382.05	961.661	780.732		1221.95
	812.129	541.894	501.866		766.867	502.586	490.809		643.724	469.389	323.766		1147.98	979.633	312.647		977.78	667.233	576.729		919.928	635.184	528.809		969.04	667.161	560.632		983.195	694.807	535.579		860.429	556.256	564.893		555.627	429.675	233.911		928.184	658.277	501.256		1371.29	968.414	748.203		1139.57
	744.799	510.262	435.569		740.041	481.855	479.488		598.102	455.557	264.728						922.698	631.233	541.292		873.69	618.173	474.532		965.698	647.728	590.516		931.548	664.451	496.038		847.039	549.723	552.158		525.599	404.476	224.943		880.154	628.186	467.941		1312.43	938.944	693.609		1039.78
	731.013	502.907	423.626		694.992	452.264	450.781		564.894	435.128	240.995						903.655	632.962	502.716		825.157	605.049	408.773		982.776	654.888	608.935		835.041	633.758	373.812		843.461	548.922	547		507.08	393.565	210.814		812.782	588.795	415.976		1288.98	905.344	712.461		1021.7
	728.891	500.143	424.816		627.245	419.018	386.707										847.284	600.813	457.731		774.94	553.347	411.528		938.035	622.447	586.092		765.535	591.149	323.86		835.713	551.487	527.848		448.9	363.058	159.421		721.226	544.494	328.217		1252.32	888.765	675.181		1015.38
	717.537	494.04	415.066		601.009	399.018	375.125										814.531	569.534	454.995		703.552	512.217	355.336		834.358	585.936	461.354		719.567	573.439	271.379		771.38	526.354	455.048		418.557	351.778	124.019		658.981	500.865	293.643		1153.42	837.154	587.346		976.126
	654.495	457.996	364.927		582.874	387.156	363.476										751.331	542.393	388.028		664.13	493.647	316.611		849.235	597.83	466.895		632.124	514.773	217.938		700.78	482.695	405.016		427.099	354.144	135.487		657.8	505.714	282.445		1119.87	831.123	536.239		919.198
	655.665	438.945	402.479		542.676	360.732	337.895										732.254	535.371	365.639		608.725	450.128	294.537		867.805	610.038	478.71						664.364	452.193	394.032		395.463	330.489	120.667		567.363	456.346	206.174		1062.62	792.234	502.136		878.16
	610.167	420.068	353.041		509.027	333.553	325.881										685.792	509.942	326.578		584.215	448.986	251.139		812.384	577.712	435.819						631.692	436.444	362.603		289.993	279.997	18.5631		482.674	409.932	135.094		1068.48	780.473	534.869		860.192
	547.261	388.183	295.432		489.099	325.89	303.102										648.643	497.327	281.016		526.116	413.834	208.522		820.568	589.578	428.982						622.956	440.472	338.9										1030.1	761.177	499.425		833.935
	575.956	392.47	340.758		447.258	319.792	236.722										614.877	487.417	236.712		462.411	367.354	176.534		793.291	561.968	429.599						601.767	422.163	333.551										971.694	747.549	416.27		828.243
	507.065	353.165	285.814		437.963	289.056	276.543										626.029	487.92	256.488		424.644	359.209	121.523		742.021	544.089	367.588						548.865	389.789	295.428										923.356	705.882	403.88		749.038
	509.978	353.42	290.751		420.402	277.641	265.128										579.379	462.012	217.968														467.394	349.545	218.862										856.833	658.09	369.095		735.72
	451.243	326.095	232.419		362.909	259.884	191.333										569.372	449.131	223.305														413.386	313.469	185.56										784.201	617.397	309.778		685.47
	399.569	299.555	185.741		343.744	237.697	196.946																																										686.959
	354.813	257.017	181.622		288.139	210.606	143.99																																										641.622
	302.847	226.506	141.777		270.513	201.926	127.375																																										583.591
					221.56	177.706	81.4428																																										493.324
					185.208	153.792	58.344
	-bkg roll ball 50, select slide, NO PROJ, measure on structure line scan 6pixel and bkg 13 pix				-bkg roll ball 50, select slide, NO PROJ, measure on structure line scan 6pixel and bkg 13 pix				-bkg roll ball 50, select slide, NO PROJ, measure on structure line scan 6pixel and bkg 13 pix				-bkg roll ball 50, select slide, NO PROJ, measure on structure line scan 6pixel and bkg 13 pix				-bkg roll ball 50, select slide, NO PROJ, measure on structure line scan 6pixel and bkg 13 pix				-bkg roll ball 50, select slide, NO PROJ, measure on structure line scan 6pixel and bkg 13 pix				-bkg roll ball 50, select slide, NO PROJ, measure on structure line scan 6pixel and bkg 13 pix				-bkg roll ball 50, select slide, NO PROJ, measure on structure line scan 6pixel and bkg 13 pix				-bkg roll ball 50, select slide, NO PROJ, measure on structure line scan 6pixel and bkg 13 pix				-bkg roll ball 50, select slide, NO PROJ, measure on structure line scan 6pixel and bkg 13 pix				-bkg roll ball 50, select slide, NO PROJ, measure on structure line scan 6pixel and bkg 13 pix
	ROI 12				ROI 10 TILTED				ROI 9 TILTED				ROI 8 TILTED				ROI 7				ROI 6				ROI 5				ROI 4 TILTED				ROI 3				ROI 2 TILTED				ROI 27 TILTED
	1 slide				1 slide				1 slide				1 slide				1 slide				1 slide				1 slide				1 slide				1 slide				1 slide				1 slide
			924.636				1157.12				1164.46				1176.75				1524.44				705.44				791.13				1973.35				945.723				705.415				736.247
			933.392				1156.77				1181.29				1170.53				1563.82				708.121				804.144				1969.96				935.479				717.303				718.714
			883.948				1142.07				1124.51				1149.81				1438.09				699.037				725.83				1940.74				914.856				669.54				717.992
	1181.99	889.895	542.458		1197	957.385	445		1009.9	712.169	552.936		1387.55	1029.97	664.087		1478.39	1141.6	625.46		783.295	618.395	306.243		610.036	438.101	319.309		1833.18	1247.8	1087.13		1217.15	869.503	645.631		1008.71	725.539	525.882		612.149	451.212	298.883
	1486.16	1037.25	833.704		1340.44	1006.14	620.846		1299.74	870.138	797.825		1674.27	1184.31	909.934		1852.81	1299.77	1027.08		813.55	656.162	292.291		764.649	521.641	451.301		2336.96	1549.57	1462.29		1375.91	938.935	811.53		1169.41	816.764	654.908		794.611	556.515	442.178
	1587.87	1111.9	883.948		1465.99	1056.85	759.815		1542.96	1017.86	975.176		1936.31	1306.03	1170.53		2209.85	1448.81	1413.36		985.629	758.072	422.605		951.768	653.696	553.562		2770.85	1793.86	1814.41		1474.04	970.323	935.479		1268.1	881.862	717.303		996.231	667.165	611.122
	1706.75	1191.68	956.568		1745.48	1212.39	990.033		1831.89	1195.81	1181.29		1943.35	1291.86	1209.92		2373.19	1527.04	1571.41		1167.24	871.271	549.651		1172.19	785.442	718.241		2997.05	1915.09	2009.36		1443.95	912.577	986.834		1269.28	876.522	729.401		1104.89	717.886	718.714
	1719.89	1217.3	933.392		1815.29	1261.35	1028.75		1866.85	1227.39	1187.57		1873.32	1254.2	1149.81		2306.89	1464.84	1563.82		1314.72	932.86	709.163		1278.58	845.578	804.144		3000.95	1940.2	1969.96		1352.88	860.265	914.856		1170.81	814.588	661.55		1130.28	714.565	772.036
	1606.64	1168.83	813.07		1911.69	1309.44	1118.46		1793.81	1188.31	1124.51		1760.91	1195.65	1049.77		2208.87	1434.51	1438.09		1290.54	914.138	699.037		1329.77	875.622	843.417		2928.16	1883.15	1940.74		1256.84	801.906	844.874		1128.03	767.508	669.54		1100.68	714.065	717.992
	1568.97	1139.59	797.414		1812.15	1260.83	1023.88		1608.55	1115.77	915.16		1633.98	1103.53	985.109		2121.33	1392.78	1353.03		1234	852.705	708.121		1197.29	806.462	725.83		2801.31	1807.43	1845.78		1201.58	759.989	820.093		1035.12	705.985	611.245		1047.51	683.705	675.63
	1489.75	1103.44	717.444		1849.61	1255.49	1103.35		1558.34	1072.48	902.32		1493.08	1032.92	854.582		1965.64	1309.12	1219.26		1150.77	818.153	617.71		1134.97	745.986	722.4		2594.17	1700.25	1660.14		1205.68	756.729	833.762		1023.66	682.889	632.852		1013.09	663.526	649.188
	1323.8	995.692	609.342		1753.53	1130.66	1156.77		1473.13	1029.8	823.329		1483.82	1029.99	842.828		1915.66	1250.03	1236.17		1136.94	818.546	591.306		1078.77	713.848	677.711		2409.28	1600.97	1501.15		1151.91	720.488	801.22		939.14	641.562	552.646		1018.77	671.639	644.671
	1261.69	944.202	589.624		1771.92	1140.56	1172.53		1383.61	988.785	733.254		1340.69	965.412	696.948		1872.3	1224.68	1202.72		1106.83	797.603	574.277		1052.06	715.453	625.121		2325.85	1565.9	1411.34		1203.86	742.004	857.731		868.471	582.588	530.926		975.621	650.641	603.536
	1253.91	934.105	593.932		1763.05	1148.1	1142.07		1335.61	941.859	731.25		1221.72	914.069	571.347		1828.26	1215.68	1137.65		1056.77	756.807	557.076		1039.43	703.131	624.549		2139.79	1465.06	1253.07		1172.2	720.417	839.022		815.158	563.177	467.965		979.987	659.497	595.195
	1170.92	882.577	535.494		1677.79	1111	1052.6		1290.47	927.649	673.807		1160.75	883.181	515.477		1736.57	1170.53	1051.22		1053.68	770.063	526.725		989.003	683.971	566.487		1965.38	1370.37	1105.02		1120.47	697.383	785.736		812.899	568.678	453.554		938.544	631.917	569.45
	1137.83	844.884	544.044		1642.98	1091.63	1023.93		1241.44	919.028	598.764		1088.29	855.097	433.075		1679.23	1130.91	1018.32		1011.47	735.835	511.899		938.489	663.146	511.351		1750.25	1280.66	872.082		1062.28	670.88	726.882		768.656	541.604	421.668		856.629	586.736	501.229
	1041.25	785.7	474.586		1510.37	1033.04	886.471		1212.41	912.58	556.818		914.422	750.158	305.06		1600.18	1094.48	939.16		956.497	701.631	473.323		952.743	659.829	543.984		1584.59	1188.69	735.244		1045.97	646.018	742.765		742.573	539.863	376.461		811.466	569.416	449.521
	960.069	761.275	369.188		1437.17	1008.52	796.078		1204.02	903.593	557.936		903.54	741.726	300.513		1583.9	1097.02	904.203		884.666	656.476	423.781		953.45	649.245	564.952		1523.23	1165.83	663.753		1025.01	647.871	700.407		688.815	508.422	335.016		787.18	548.388	443.472
	878.326	690.707	348.436		1412.22	993.153	778.272						810.638	687.942	227.864		1592.99	1115.9	886.023		904.757	675.978	424.875		911.506	616.676	547.542		1384.48	1077.31	570.454		949.734	610.913	629.237		660.812	497.427	303.429		727.98	519.662	386.878
	807.635	639.034	313.116		1336.38	964.658	690.337						737.069	618.653	219.915		1483.27	1042.31	818.927		870.192	657.457	395.08		888.471	607.415	521.961		1289.99	1051.53	442.841		951.778	600.671	652.055		631.51	481.956	277.743		631.181	478.626	283.315
	753.629	599.475	286.286		1191.85	891.655	557.497						686.44	597.812	164.594		1373.3	960.983	765.736		797.888	590.944	384.324		849.692	586.463	488.854		1228.73	1008.32	409.338		889.774	572.21	589.763		595.713	448.596	273.218		534.293	417.821	216.304
	711.605	569.192	264.481		1142.32	886.501	475.088						634.11	570.675	117.807		1271.95	922.735	648.537		791.05	593.888	366.159		845.937	577.406	498.7		1144.91	937.379	385.415		848.577	556.571	542.297		532.277	423.424	202.154		503.208	394.57	201.758
	704.968	560.979	267.409		1065.42	831.94	433.597										1177.7	841.498	624.37		781.908	605.62	327.392		801.466	560.187	448.09						834.647	537.892	551.118		499.487	402.889	179.395		448.753	341.415	199.342
	641.855	521.898	222.778														1089.09	807.379	523.171		710.066	557.563	283.22		783.873	549.369	435.507						762.077	494.238	497.416						412.842	318.771	174.702
	659.979	528.748	243.715														1033.7	774.227	481.874		707.426	556.231	280.792		742.13	514.585	422.583						759.949	513.618	457.471						346.33	285.961	112.113
	621.564	505.084	216.321														969.682	735.547	434.823		700.275	553.719	272.176		705.748	488.55	403.368						726.162	482.278	452.928
	613.829	496.839	217.266														892.067	674.391	404.255		682.582	535.062	273.966		676.126	490.349	345.014						707.107	458.79	461.161
	584.367	473.857	205.233														854.739	674.148	335.383		615.577	507.625	200.483		670.849	479.297	355.739						685.863	454.652	429.392
	551.204	461.925	165.804														762.247	619.345	265.39		611.539	480.822	242.76		632.913	446.137	346.869						636.845	428.358	387.19
	518.627	442.444	141.483														759.37	596.297	302.85		603.966	490.414	210.882		595.587	425.988	314.97						612.813	417.764	362.235
	557.253	449.091	200.872														736.05	596.684	258.823						585.916	421.232	305.842						598.032	411.297	346.794
	538.062	460.614	143.832														738.99	584.561	286.796						548.051	397.468	279.653						579.189	409.527	315.087
	511.384	442.815	127.342														725.172	573.001	282.603						469.394	351.206	219.492						594.46	401.992	357.44
	503.953	417.854	159.898														642.175	546.946	176.855						409.417	334.216	139.66						535.402	362.113	321.821
	484.728	415.528	128.513														596.054	500.65	177.18						346.317	309.931	67.5734						502.948	339.085	304.316
	511.891	423.644	163.888														574.364	493.283	150.58														447.92	314.74	247.333
	486.331	424.405	115.006														522.729	452.027	131.304														381.728	276.153	196.067
	482.226	412.506	129.481														517.955	448.342	129.281														331.694	244.453	162.02
	461.673	403.561	107.922														455.792	420.266	65.9767														267.008	214.902	96.767
	465.396	394.681	131.327														420.621	384.251	67.5452
	438.488	389.006	91.8942														415.1	385.978	54.0824
	392.21	342.803	91.7562														422.487	368.05	101.096
	418.854	351.138	125.758														397.6	361.877	66.3422
	400.261	333.072	124.78														392.827	360.78	59.5149
																	398.401	349.005	91.7351
																	396.497	347.718	90.5894
																	371.939	337.016	64.8576
																	404.793	350.868	100.145
																	405.547	342.591	116.917
																	399.722	351.517	89.5228
																	378.909	340.791	70.7902
	-bkg roll ball 50, select slide, NO PROJ, measure on structure line scan 6pixel and bkg 13 pix				-bkg roll ball 50, select slide, NO PROJ, measure on structure line scan 6pixel and bkg 13 pix				-bkg roll ball 50, select slide, NO PROJ, measure on structure line scan 6pixel and bkg 13 pix				-bkg roll ball 50, select slide, NO PROJ, measure on structure line scan 6pixel and bkg 13 pix				-bkg roll ball 50, select slide, NO PROJ, measure on structure line scan 6pixel and bkg 13 pix				-bkg roll ball 50, select slide, NO PROJ, measure on structure line scan 6pixel and bkg 13 pix				-bkg roll ball 50, select slide, NO PROJ, measure on structure line scan 6pixel and bkg 13 pix				-bkg roll ball 50, select slide, NO PROJ, measure on structure line scan 6pixel and bkg 13 pix				-bkg roll ball 50, select slide, NO PROJ, measure on structure line scan 6pixel and bkg 13 pix				-bkg roll ball 50, select slide, NO PROJ, measure on structure line scan 6pixel and bkg 13 pix				-bkg roll ball 50, select slide, NO PROJ, measure on structure line scan 6pixel and bkg 13 pix				-bkg roll ball 50, select slide, NO PROJ, measure on structure line scan 6pixel and bkg 13 pix				-bkg roll ball 50, select slide, NO PROJ, measure on structure line scan 6pixel and bkg 13 pix
	ROI 30				ROI 28				ROI 27				ROI 26 TILTED				ROI 25				ROI 24				ROI 22 TILTED				ROI 19				ROI 18				ROI 17 TILTED				ROI 16				ROI 15				ROI 14
	1 slide				1 slide				1 slide				1 slide				1 slide				1 slide				1 slide				1 slide				1 slide				1 slide				1 slide				1 slide				1 slide
			1222.25				1115.75				742.203				1109.68				960.728				1320.46				1566.65				1402.31				708.016				747.016				1144.65				1019.7
			1220.92				1103.62				745.878				1134.12				971.162				1313.15				1588.83				1427.72				709.062				778.378				1158.7				1012.01
			1184.61				1100				693.961				1055.43				880.972				1271.15				1479.58				1330.93				704.71				683.03				1087.62				985.71
	1044.34	828.73	400.426		982.245	691.929	539.157		836.948	607.269	426.547		1189.4	859.308	613.035		1271.66	978.565	544.319		1327.05	962.477	677.06		1860.11	1316.5	1009.57		1711.25	1227.54	898.32		1069.96	880.704	351.469		976.033	772.335	378.298		1273.85	917.146	662.449		1025.72	759.72	494.006		540.056
	1319.86	980.349	630.529		1366.74	912.62	843.356		1112.17	798.854	581.872		1458.08	997.08	856.137		1390.19	1010.33	705.447		1482.35	1031.06	838.12		2097.66	1437.87	1225.34		1863.7	1286.75	1071.48		1188.33	996.077	357.036		1122.19	833.721	535.732		1356.9	947.052	761.144		1169.93	857.661	579.921		703.178
	1618.91	1135.79	897.21		1573.54	1036.61	997.159		1399.48	997.855	745.878		1716.57	1148.39	1055.19		1510.13	1041.39	870.526		1794.67	1181.05	1139.58		2329.66	1532.96	1479.58		2119.27	1402.61	1330.93		1339.3	1116.89	413.035		1226.46	874.667	653.325		1558.59	1003.24	1031.36		1367.36	956.795	762.48		892.769
	1965.81	1337.77	1166.36		1724.06	1131.75	1100		1425.97	1002.33	786.771		1823.14	1209.58	1139.48		1618.75	1064.1	1030.05		2003.12	1296.04	1313.15		2507.64	1629.13	1631.53		2207.05	1427.21	1448.27		1470.91	1191.76	518.415		1349.28	930.158	778.378		1673.71	1049.79	1158.7		1606.59	1109.33	923.486		966.813
	2097.81	1440.4	1220.92		1793.22	1177.41	1143.64		1354.14	980.467	693.961		1803.12	1192.45	1134.12		1536.44	1013.5	971.162		2066.21	1324.71	1377.07		2377.15	1521.63	1588.83		2198.97	1430.2	1427.72		1504.45	1198.51	568.169		1357.6	937.793	779.64		1663.84	1024.34	1187.64		1696.34	1151.41	1012.01		993.52
	2168.94	1489.82	1261.22		1769.68	1175.42	1103.62		1259.08	915.41	638.245		1718.74	1150.43	1055.43		1426.36	951.989	880.972		1907.14	1222.67	1271.15		2114.09	1417.04	1294.53		1965.11	1315.8	1205.88		1503.45	1151.62	653.386		1234.69	866.903	683.03		1563.92	978.279	1087.62		1692.05	1120.55	1061.37		960.347
	2089	1451.14	1184.61		1690.35	1126.48	1047.2		1144.05	844.076	557.095		1542.59	1057.96	900.021		1340.41	897.625	822.317		1876.91	1224.4	1211.81		1891.79	1296.97	1104.67		1785.58	1206.38	1075.66		1456.14	1074.34	709.062		1151.3	805.872	641.518		1589.27	1004.64	1085.73		1599.22	1080.39	963.538		961.567
	1959.82	1381.32	1074.36		1575.26	1073.16	932.469		1071.5	799.933	504.346		1391.2	964.689	792.096		1273.58	851.254	784.315		1857.33	1195.78	1228.59		1702	1168.69	990.433		1558.91	1083.3	883.283		1377.77	995.309	710.276		1056.59	745.085	578.508		1505.37	967.265	999.331		1577.09	1060.64	959.111		951.038
	1787.79	1272.19	957.54		1570.78	1066.55	936.429		1116.24	768.925	645.012		1183.78	847.38	624.734		1258.95	820.724	813.844		1746.57	1155.41	1097.88		1597.46	1089.91	942.585		1528.16	1038.34	909.666		1319.65	940.191	704.71		1014.4	718.786	549.007		1412.77	909.744	934.197		1530.72	1010.32	966.449		947.354
	1728.08	1230.61	923.873		1463.2	987.481	883.485		1110.26	760.071	650.359		1065.99	769.766	550.125		1185.1	785.691	741.759		1685.63	1114.54	1060.58		1484.61	1007.7	885.681		1313.34	906.881	754.844		1218.44	865.567	655.329		962.13	690.699	504.086		1322.64	883.315	815.883		1415.88	938.378	886.782		995.936
	1573.41	1113.53	854.07		1343.46	922.749	781.317		1082.85	742.912	631.319		1001.59	718.424	525.878		1132.49	764.881	682.696		1606.97	1084.3	970.667		1468.97	992.66	884.583		1191.92	832.074	668.294		1176.23	864.554	578.833		960.189	678.492	523.151		1305.64	863.22	821.642		1449.93	943.966	939.645		913.663
	1502.13	1045.42	848.173		1257.07	875.597	708.449		1063.38	718.835	639.862		898.756	669.023	426.647		1076.88	735.614	633.774		1573.63	1072.82	930.077		1371.14	935.816	808.465		1167.95	798.375	686.349		1177	835.77	633.705		954.37	670.365	527.438		1278.31	856.33	783.684		1452.47	921.704	985.71		918.036
	1399.91	994.234	753.403		1136.11	812.536	600.917		989.169	675.37	582.769		812.893	633.185	333.744		1059.38	709.859	649.102		1531.42	1053.99	886.667		1253.04	889.888	674.429		1154.96	772.518	710.242		1082.8	785.853	551.471		928.481	655.159	507.597		1246.91	826.745	780.31		1373.1	886.686	903.349		938.362
	1281.85	901.886	705.65		1081.46	783.505	553.336		971.675	644.436	607.729		784.558	618.048	309.232		990.796	679.173	578.729		1410.54	1030.21	706.323		1226.1	866.065	668.631		1067.17	724.441	636.497		1011.97	739.143	506.687		876.772	621.66	473.778		1187.24	816.418	688.673		1330.15	854.92	882.562		945.197
	1202.08	852.853	648.571		1084.2	786.655	552.592		956.845	635.349	597.064		779.896	613.318	309.359		974.549	684.026	539.543		1385.02	1010.29	695.923		1208.61	855.509	655.755		1019.72	702.786	588.585		1001.8	723.837	516.213		799.246	564.735	435.52		1175.22	806.343	685.053		1288.31	828.717	853.537		861.362
	1064.17	779.418	528.827		1037.46	744.179	544.673		914.92	612.29	562.027		754.035	609.677	268.094		938.427	653.198	529.711		1204.23	925.601	517.462		1147.48	816.25	615.149		1028.68	705.791	599.659		945.073	703.868	447.953		829.413	570.912	480.073		1173.24	810.11	674.386		1288.41	843.026	827.142		863.401
	1023.76	736.439	533.604		977.439	719.875	478.334		864.545	600.245	490.843		746.592	600.563	271.198		858.5	612.993	455.942		1148.66	902.982	456.257		1068.39	786.756	523.039		962.528	673.441	536.876		916.715	668.287	461.366		820.405	566.289	471.929		1136.05	773.947	672.48		1227.76	811.153	773.69		820.665
	878.005	674.535	377.873		927.445	702.413	417.918		819.999	570.417	463.51		674.539	552.323	226.973		858.224	612.104	457.081		1108.52	878.657	426.885		1108.05	820.75	533.551		910.283	656.391	471.513		905.638	658.671	458.653		739.792	538.933	373.024		1111.42	763.882	645.436		1202.04	791.825	761.836		787.184
	847.559	652.116	362.966		891.724	664.728	421.565		839.112	573.403	493.458		661.13	549.171	207.925		799.861	588.803	391.965		1045.49	842.528	376.934		1014.8	767.693	458.905		968.249	695.813	505.952		834.559	615.273	407.246		693.002	505.607	348.019		1095.34	761.025	620.874		1177.8	773.503	750.836		744.8
	802.64	609.679	358.356		832.358	638.138	360.695		853.868	565.573	535.404						788.63	581.348	384.953		980.728	824.135	290.815		962.921	731.923	428.996		924.284	656.336	497.618		839.063	626.033	395.626		613.663	457.42	290.167		1072.43	732.392	631.496		1193.64	796.031	738.411		706.644
	778.632	587.655	354.672		813.008	624.64	349.827		815.14	556.098	481.079						786.004	573.11	395.375		917.441	788.076	240.249		895.023	697.646	366.556		890.878	644.93	456.761		778.041	585.007	358.491		569.611	428.132	262.746		1005.12	698.143	570.107		1205.42	812.62	729.48		683.508
	746.147	569.4	328.245		769.582	591.375	330.955		814.851	539.871	510.677						742.042	564.37	329.961		845.531	750.568	176.359		848.428	667.878	335.308		899.448	653.496	456.769		730.763	558.798	319.364		526.482	428.079	182.748		965.8	689.143	513.792		1149.71	776.946	692.274		653.756
	727.803	554.165	322.471		713.519	575.342	256.614		784.259	513.369	503.08						674.755	530.787	267.37		784.116	704.58	147.711		765.002	610.471	286.988		892.01	661.226	428.599		709.004	547.363	300.189		479.618	391.262	164.088		909.727	649.096	484.029		1052.84	727.177	604.8		629.573
	707.608	519.606	349.147		640.938	525.694	214.024		815.635	536.947	517.563						626.423	497.759	238.949		753.958	673.894	148.69		682.615	575.827	198.32		858.649	651.296	385.085		672.855	523.719	276.967		494.439	407.597	161.277		918.956	650.066	499.368		989.232	695.557	545.398		592.224
	675.485	507.226	312.481						798.801	532.571	494.425						551.625	470.337	150.962		705.564	633.815	133.249		641.03	548.759	171.361		892	644.582	459.492		714.589	524.408	353.194		493.655	398.164	177.34		903.123	650.148	469.811		846.52	616.906	426.426		546.473
	606	471.889	249.064						758.969	518.82	445.991						547.845	453.21	175.749		606.79	569.636	69.0005						847.115	624.148	414.082		635.226	479.179	289.8		453.437	375.49	144.758		862.023	618.969	451.386		770.174	575.874	360.845		504.328
	617.805	491.158	235.202						721.22	486.706	435.524						540.072	437.81	189.915										813.766	599.699	397.552		600.6	454.745	270.874		453.671	377.106	142.192		864.965	622.462	450.362		712.536	549.614	302.571		443.005
	627.266	479.825	273.819						639.998	451.242	350.547						488.615	407.012	151.548										774.196	581.883	357.153		558.501	440.271	219.57		440.712	362.256	145.704		784.436	591.058	359.13		668.697	526.841	263.446		381.055
	557.876	440.437	218.1						521.909	391.875	241.491						435.161	367.036	126.519										789.598	586.96	376.328		541.727	409.202	246.117		440.967	373.348	125.58		673.61	532.643	261.795		597.131	494.895	189.867
	525.26	404.47	224.324						464.075	349.913	212.015						406.311	340.253	122.678										817.802	608.88	387.996		526.651	420.599	196.953		442.629	354.187	164.251		571.913	473.255	183.223		536.631	480.287	104.64
	516.668	410.252	197.629														346.269	298.293	89.0974										740.497	551.77	350.492		516.039	404.132	207.828										522.809	450.514	134.262
	485.432	386.514	183.706														268.093	244.522	43.7745										688.409	548.403	260.011		473.618	379.198	175.352										494.966	441.423	99.4381
	450.349	373.437	142.835																										632.525	503.229	240.122		484.005	409.315	138.71
	429.006	357.67	132.48																										560.892	451.485	203.186		472.739	381.248	169.912
	406.752	359.154	88.3961																										472.514	407.282	121.146		455.709	381.435	137.938
																																	438.511	374.498	117.356
	-bkg roll ball 50, select slide, NO PROJ, measure on structure line scan 6pixel and bkg 13 pix				-bkg roll ball 50, select slide, NO PROJ, measure on structure line scan 6pixel and bkg 13 pix				-bkg roll ball 50, select slide, NO PROJ, measure on structure line scan 6pixel and bkg 13 pix				-bkg roll ball 50, select slide, NO PROJ, measure on structure line scan 6pixel and bkg 13 pix				-bkg roll ball 50, select slide, NO PROJ, measure on structure line scan 6pixel and bkg 13 pix				-bkg roll ball 50, select slide, NO PROJ, measure on structure line scan 6pixel and bkg 13 pix				-bkg roll ball 50, select slide, NO PROJ, measure on structure line scan 6pixel and bkg 13 pix				-bkg roll ball 50, select slide, NO PROJ, measure on structure line scan 6pixel and bkg 13 pix				-bkg roll ball 50, select slide, NO PROJ, measure on structure line scan 6pixel and bkg 13 pix
	ROI 13 TILTED				ROI 12				ROI 11 TILTED				ROI 10				ROI 7				ROI 6				ROI 5				ROI 3 TILTED				ROI 2
	1 slide				1 slide				1 slide				1 slide				1 slide				1 slide				1 slide				1 slide				1 slide
			1579.69				1473.62				881.688				1016				853.143				958.046				1199.64				1051.82				1032.77
			1589.63				1462.46				859.896				1008.29				858.954				958.519				1204.02				1049.08				1031.06
			1550.37				1457.6				857.142				989.995				839.499				914.029				1190.28				1031.21				1021.29
	1647.48	1143.84	935.333		1275.31	956.215	592.602		1037.57	919.112	219.99		914.081	686.247	423.12		782.789	590.519	357.073		1035.6	815.328	409.072		1091.41	701.466	724.188		622.5	425.846	365.214		1158.21	908.812	463.17
	1886.95	1268.94	1147.72		1569.89	1119.77	835.937		1152.39	979.265	321.511		1097.66	785.502	579.718		1007.6	722.769	528.979		1166.63	847.743	592.226		1455.27	917.742	998.275		851.429	557.237	546.356		1342.23	970.785	689.823
	2211.59	1470.95	1375.48		1805.86	1232.98	1063.92		1312.61	1051.48	484.951		1292.13	886.423	753.46		1218.24	842.399	697.991		1321.77	920.536	745.143		1711.8	1063.48	1204.02		1120.92	709.111	764.781		1492.3	1015.37	885.729
	2452.92	1591.88	1599.06		2021.76	1303.44	1334.03		1392.03	1061.04	614.7		1546.08	1013.01	989.995		1367.97	915.932	839.499		1510.35	994.221	958.519		1776.98	1128.33	1204.63		1321.64	837.356	899.394		1625.11	1069.92	1031.06
	2464.55	1629.73	1550.37		2106.67	1319.19	1462.46		1537.12	1103.53	805.237		1604	1038.76	1049.72		1410.42	946.822	860.976		1512.49	973.172	1001.59		1815.09	1174.17	1190.28		1497.36	950.832	1014.98		1621.29	1058.09	1045.95
	2470.92	1614.97	1589.63		2105.55	1297.43	1500.8		1631.84	1132.13	928.025		1577.05	1034.13	1008.29		1392.99	930.473	858.954		1443.75	951.583	914.029		1683.88	1128.27	1031.85		1577.83	1012.94	1049.08		1562	1012.07	1021.29
	2340.38	1586.38	1400.27		2059.95	1275.09	1457.6		1545.48	1083.94	857.142		1525.58	995.539	984.369		1346.71	904.372	821.486		1347.65	896.846	837.202		1715.04	1156.45	1037.38		1577.2	998.263	1075.17		1486.5	962.45	973.235
	2208.4	1503.71	1308.7		1968.69	1193.95	1438.81		1538.38	1081.47	848.554		1387.07	923.138	861.588		1301.79	898.027	749.848		1251.39	840.853	762.421		1581.91	1105.7	884.385		1547.22	991.951	1031.21		1459.81	949.573	947.574
	2015.31	1422.62	1100.71		1847.31	1127.76	1336.3		1540.13	1077.11	859.896		1357.88	897.922	854.201		1223.93	834.686	722.88		1184.36	804.248	705.93		1542.87	1073.22	872.211		1451.54	961.442	910.179		1377.18	889.576	905.545
	1904.85	1360.99	1010.02		1767.49	1083.9	1269.52		1509.33	1073.06	810.225		1339.34	920.745	777.397		1206.56	802.867	749.706		1122.72	776.528	642.92		1523.7	1024.72	926.677		1361.72	900.75	856.083		1331.18	861.523	872.216
	1796.34	1311.58	900.271		1583.24	983.978	1112.92		1462.99	1063.59	741.742		1330.39	904.071	791.733		1214.48	814.346	743.115		1089.32	754.294	622.198		1505.17	994.567	948.266		1263.44	845.623	775.941		1270.05	841.374	796.119
	1591.85	1214.77	700.286		1463.61	921.088	1007.54		1476.91	1069.71	756.228		1299.29	898.522	744.281		1256.71	820.589	809.935		1086.58	753.964	617.72		1364.03	905.406	851.73		1193.97	830.998	674.084		1250.42	840.013	762.181
	1505.27	1177.02	609.609		1424.42	891.669	989.394		1418.84	1027.69	726.425		1274.12	888.219	716.674		1251.75	831.021	781.348		1047.14	717.545	612.112		1372.13	890.834	893.843		1155.68	802.844	655.262		1171.55	779.731	727.667
	1380.83	1116.67	490.581		1370.39	863.262	941.815		1369.29	1034.1	622.494		1206.39	857.819	647.338		1168.52	804.373	676.281		990.516	704.069	531.973		1255.99	825.274	799.901		1099.66	795.25	565.337		1087.69	745.83	634.878
	1294.45	1062.9	430.023		1352.17	853.48	926.145		1305.67	1003.69	560.83		1132.16	825.668	569.206		1189	823.449	678.876		1001.59	691.793	575.342		1200.05	814.822	715.431		1058.51	785.498	507.03		1005.45	713.148	542.837
	1212.57	1018.18	361		1278.16	831.397	829.7		1264.27	983.165	522.061		1153.04	827.498	604.58		1148.92	804.716	639.238		996.421	681.327	585.175		1090.95	732.312	666.037		1055.08	780.398	510.12		942.671	692.672	464.284
	1096.14	954.248	263.52		1215.68	816.017	742.228		1202.84	960.881	449.348		1145.4	825.557	593.996		1116.21	786.68	611.988		919.96	655.09	491.903		970.344	667.05	563.261		947.194	727.222	408.52		896.836	653.642	451.646
	966.889	867.193	185.148		1094.6	750.022	639.932		1095.1	887.116	386.256		1079.35	789.17	538.907		1103.66	777.503	605.724		893.482	634.75	480.502		876.057	611.349	491.6		901.744	711.383	353.527		819.678	587.084	431.961
	888.73	810.063	146.097		1006.45	702.048	565.321		1066.99	873.498	359.333		1010.49	760.319	464.608		1079.57	775.761	564.222		856.786	617.92	443.608		839.922	586.966	469.776		897.284	705.965	355.308		758.848	569.817	351.057
	850.752	767.51	154.593		987.654	685.3	561.515		1013.71	837.271	327.664		963.484	715.94	459.725		1037.55	757.275	520.514		833.668	615.044	406.015		826.404	577.063	463.061		736.631	621.672	213.496		703.722	550.113	285.274
	798.644	720.802	144.564		917.328	651.846	493.038				0		922.041	699.061	414.105		976.432	718.761	478.532		823.465	598.025	418.673		717.27	507.997	388.65		787.573	650.84	253.933		656.906	521.435	251.589
	717.689	662.974	101.614		798.873	573.127	419.243				0		893.461	681.278	394.053		921.687	680.895	447.184		747.431	551.36	364.133		661.421	480.898	335.256						619.473	497.065	227.329
	684.994	631.566	99.2223		793.651	565.601	423.522				0		804.145	640.336	304.217		865.276	662.976	375.7		726.929	555.225	318.878		586.193	451.115	250.86						573.767	482.425	169.635
	642.668	595.757	87.1206		715.004	526.938	349.265				0		780.161	616.639	303.684		789.485	603.305	345.763		650.94	505.437	270.218		527.056	398.135	239.424						526.244	476.201	92.9376
	589.929	548.124	77.638		657.829	496.507	299.597				0		706.679	574.776	244.963		634.519	524.371	204.56		596.132	467.521	238.849		447.097	346.765	186.332						499.215	458.25	76.0775
			0		561.914	431.806	241.63				0		678.19	558.127	222.974		583.321	475.884	199.525		594.311	463.911	242.171		424.68	333.809	168.76						466.396	431.961	63.9505
			0		506.463	398.077	201.288				0		615.833	521.377	175.418		512.194	454.472	107.199		538.611	428.624	204.262		361.71	312.94	90.5725
			0		411.871	325.225	160.915				0		578.019	491.615	160.464		413.222	376.442	68.3053		470.116	393.426	142.424		342.269	291.416	94.4405
			0				0				0		520.075	458.663	114.051		380.825	333.709	87.5013		419.746	362.504	106.307		260.697	232.659	52.0693
													MANIP II
	-bkg roll ball 50, select slide, NO PROJ, measure on structure line scan 6pixel and bkg 13 pix				-bkg roll ball 50, select slide, NO PROJ, measure on structure line scan 6pixel and bkg 13 pix				-bkg roll ball 50, select slide, NO PROJ, measure on structure line scan 6pixel and bkg 13 pix				-bkg roll ball 50, select slide, NO PROJ, measure on structure line scan 6pixel and bkg 13 pix				-bkg roll ball 50, select slide, NO PROJ, measure on structure line scan 6pixel and bkg 13 pix				-bkg roll ball 50, select slide, NO PROJ, measure on structure line scan 6pixel and bkg 13 pix				-bkg roll ball 50, select slide, NO PROJ, measure on structure line scan 6pixel and bkg 13 pix				-bkg roll ball 50, select slide, NO PROJ, measure on structure line scan 6pixel and bkg 13 pix				-bkg roll ball 50, select slide, NO PROJ, measure on structure line scan 6pixel and bkg 13 pix				-bkg roll ball 50, select slide, NO PROJ, measure on structure line scan 6pixel and bkg 13 pix				-bkg roll ball 50, select slide, NO PROJ, measure on structure line scan 6pixel and bkg 13 pix				-bkg roll ball 50, select slide, NO PROJ, measure on structure line scan 6pixel and bkg 13 pix				-bkg roll ball 50, select slide, NO PROJ, measure on structure line scan 6pixel and bkg 13 pix
	ROI 44				ROI 43 TILTED				ROI 42				ROI 41				ROI 40 TILTED				ROI 36 TILTED				ROI 35 TILTED				ROI 34				ROI 32 TILTED				ROI 31 TILTED				ROI 30				ROI 29 TILTED				ROI 28 TILTED
	1 slide				1 slide				1 slide				1 slide				1 slide				1 slide				1 slide				1 slide				1 slide				1 slide				1 slide				1 slide				1 slide
			436.156				547.188				828.552				970.931				531.198				777.632				639.768				633.649				804.645				1056.74				921.766				917.232
			432.416				544.313				818.966				970.237				517.893				790.487				637.135				629.561				799.487				1072.58				922.806				899.067
			399.609				527.24				813.608				919.319				516.447				727.698				625.02				624.262				788.232				1022.92				873.023				880.781
	471.493	377.061	175.374		574.606	447.06	236.871		976.287	709.875	494.765		1179.75	891.418	535.469		636.349	523.079	210.358		767.809	641.442	234.681		402.376	326.466	140.975		550.012	424.099	233.838		1101.2	791.046	575.999		497.253	379.999	217.757		578.028	416.356	300.249		787.578	588.375	369.947		709.781
	611.109	465.164	271.041		702.391	527.071	325.594		1077.01	771.594	567.207		1307.7	981.021	606.698		714.009	581.334	246.397		1001.42	799.881	374.291		519.952	392.567	236.573		669.669	483.414	345.903		1135.01	787.953	644.534		719.693	510.103	389.238		754.154	550.08	378.995		945.328	657.203	535.089		947.298
	698.977	527.303	318.823		872.583	631.438	447.84		1249.86	852.393	738.151		1394.69	1049.67	640.749		812.697	630.971	337.491		1220.7	945.293	511.469		631.517	472.143	295.98		818.571	581.626	440.04		1201.46	799.572	746.37		976.085	663.599	580.33		936.877	681.519	474.236		1019.1	711.658	570.972		1174.04
	766.443	593.097	321.929		1014.1	721.006	544.313		1351.74	917.012	807.356		1448.82	1102.65	642.88		909.796	676.651	432.983		1467.91	1099.25	684.65		793.957	558.018	438.173		952.073	655.707	550.395		1236.75	791.866	826.216		1150.01	761.518	721.48		1173.21	806.667	680.722		1154.49	798.854	660.473		1380.71
	848.009	649.631	368.417		1067.29	760.36	570.012		1390.65	931.297	853.082		1638.25	1192.86	827.164		979.039	700.174	517.893		1549.09	1157.25	727.698		959.137	632.484	606.641		1020.81	700.597	594.677		1197.74	767.246	799.487		1289	875.75	767.462		1394.6	934.21	855.014		1314.75	894.545	780.376		1528.98
	874.154	664.74	388.912		1020.15	736.254	527.24		1323.28	885.188	813.608		1772.75	1250.31	970.237		996.104	718.018	516.447		1575.74	1137.05	814.71		1020.83	684.28	625.02		1074.6	726.152	647.124		1148.67	724.233	788.232		1476.79	996.752	891.5		1460.7	963.803	922.806		1452.18	968.064	899.067		1673.32
	886.127	653.288	432.416		940.933	671.765	499.883		1252.68	831.061	783.012		1809.42	1258.45	1023.24		1010.01	708.875	559.254		1501.54	1075.89	790.487		1054.64	700.79	657.15		1050.2	714.27	623.868		1071.64	687.181	713.99		1675.74	1124.93	1022.92		1493.8	971.779	969.468		1495.3	972	971.846		1768.22
	927.965	671.419	476.443		892.94	641.059	467.78		1194.13	792.011	746.796		1713.76	1218.74	919.319		927.4	668.336	481.119		1376.59	988.183	721.324		1027.63	684.556	637.135		988.258	686.189	560.985		1032.42	659.562	692.456		1740.25	1162.71	1072.58		1373.99	918.779	845.386		1389.38	915.114	880.781		1759.9
	861.138	645.964	399.609		866.688	636.851	426.841		1244.82	820.213	788.559		1632.89	1163.23	872.229		893.326	647.327	456.855		1256.59	901.213	659.978		983.509	688.948	547.041		1012.38	697.102	585.52		1027.93	632.615	734.156		1738	1159.31	1074.7		1350.42	880.332	873.023		1296.19	872.675	786.518		1714.7
	804.344	617.023	347.88		817.628	610.447	384.765		1228.43	800.615	794.511		1547.78	1155.17	729.119		825.073	583.888	447.916		1134.29	841.006	544.667		940.651	653.212	533.815		1007.48	668.486	629.561		941.63	598.198	637.803		1590.03	1077.04	952.696		1285.01	843.037	820.798		1181.73	817.318	676.767		1587.36
	733.579	547.505	345.566		782.444	579.469	376.954		1253.48	812.495	818.966		1454.02	1095.37	666.072		819.718	578.032	448.845		1067.97	774.741	544.575		872.601	619.79	469.505		950.04	633.566	587.738		934.968	575.553	667.485		1561.57	1049.83	950.37		1223.37	786.417	811.489		1141.08	776.368	677.33		1458.98
	653.433	494.407	295.333		770.059	580.259	352.486		1171.46	795.624	697.985		1343.31	1056.71	532.251		802.176	558.453	452.628		993.399	729.565	489.977		783.267	575.537	385.785		917.939	613.662	565.085		907.407	579.475	609.018		1429.04	980.634	832.76		1263.07	795.432	868.475		1042.08	707.28	621.772		1388.73
	586.409	446.013	260.737		786.288	575.984	390.563		1134.53	764.326	687.52		1263.33	995.973	496.523		775.196	526.858	461.2		875.393	671.3	379.029		716.406	567.938	275.727		948.06	618.423	612.184		902.134	575.272	607.03		1381	964.918	772.715		1181.64	758.29	786.217		983.025	673.442	574.941		1314.64
	572.147	438.344	248.491		773.578	557.973	400.408		1054.74	734.112	595.454		1197.49	965.796	430.29		758.957	512.288	458.099		784.607	640.194	268.195		660.924	527.003	248.711		960.229	624.088	624.262		869.308	564.941	565.253		1335.93	947.028	722.25		1176.6	743.323	804.655						1287.46
	544.631	403.791	261.559		723.614	535.876	348.657		1062.37	717.938	639.653		1157.83	953.334	379.776		730.365	495.206	436.723										957.828	629.477	609.794		841.327	543.866	552.428		1275.86	929.366	643.495		1151.79	726.2	790.389
	506.431	389.326	217.481		723.255	554.266	313.837		1050.9	709.136	634.71		1100.66	886.17	398.337		647.047	444.403	376.339										929.732	616.067	582.521		752.032	496.777	474.044		1186.26	878.739	571.101		1120.97	710.57	762.167
	512.181	403.003	202.759		701.966	531.167	317.197		1028.17	706.107	598.117		1130.76	878.944	467.65		627.687	443.586	341.903										898.624	593.549	566.567		699.795	485.555	397.876		1129.14	849.834	518.712		1116.28	707.67	758.85
	538.777	411.587	236.21		682.828	521.971	298.734		1002.75	691.456	578.126		1080.99	838.117	451.042		582.29	409.3	321.268										876.569	585.209	541.096		661.962	462.154	371.072		1122.82	855.043	497.306		1074.75	696.931	701.668
	484.747	387.752	180.133		629.131	514.525	212.839		948.466	657.547	540.279		1093.27	814.287	518.111		586.53	415.452	317.717										873.443	600.764	506.406		649.04	460.425	350.284		1045.11	815.581	426.276		1059.9	690.819	685.432
	489.427	388.763	186.947		617.44	500.442	217.281		925.524	649.057	513.439		1008.27	755.572	469.304		526.296	374.113	282.625										871.299	586.346	529.197		614.024	438.258	326.422		1017.58	814.158	377.787		1022.56	678.46	639.05
	456.983	373.027	155.918						869.082	624.538	454.153		967.067	712.532	472.709		466.097	339.255	235.564										833.711	570.667	488.51		564.315	419.045	269.788		953.831	765.294	350.14		1004.11	647.266	662.707
	443.443	353.97	166.164						856.188	628.381	423.069		961.105	664.07	551.637														837.395	573.655	489.802		555.09	405.07	278.608		930.2	743.442	346.836		968.806	629.514	630.114
	452.853	363.277	166.355						797.75	585.233	394.674		885.181	635.801	463.135														787.809	553.012	436.052		484.517	390.2	175.16						971.028	623.21	645.947
	407.991	349.149	109.278						715.753	534.971	335.737		824.472	585.741	443.358														776.549	537.652	443.665		457.568	367.552	167.173						984.189	629.571	658.577
	399.221	334.142	120.861						667.486	512.349	288.111		791.52	561.172	427.789														720.968	484.717	438.753		466.071	370.093	178.244						948.315	636.84	578.453
	376.477	317.403	109.708						630.768	498.508	245.626		731.951	538.91	358.505														700.136	502.117	367.75										908.982	604.503	565.46
	397.81	319.912	144.668										675.655	490.699	343.489														620.134	471.481	276.07										891.562	592.562	555.285
	381.696	317.923	118.436										597.67	443.908	285.557														627.282	460.161	310.367										857.926	581.252	513.822
	356.924	302.539	101										505.765	396.685	202.579														574.454	422.719	281.794										816.515	558.501	479.169
	354.5	293.822	112.689										461.433	364.508	180.004														537.014	406.743	241.933										813.755	546.706	495.947
	325.524	268.971	105.026																										490.09	373.283	216.927										812.481	548.921	489.468
	340.226	278.577	114.492																										432.057	347.936	156.224										814.712	556.595	479.359
	308.864	258.532	93.4733																										433.304	341.119	171.201										776.572	535.651	447.425
	303.21	245.925	106.387																																						796.843	530.611	494.431
	294.032	239.777	100.76																																						786.411	521.147	492.634
	270.265	228.178	78.1621																																						762.871	506.165	476.741
	243.464	202.598	75.8936																																						747.79	493.508	472.238
																																									685.006	456.228	424.874
																																									595.394	415.441	334.198
																																									531.408	378.028	284.849
																																									472.054	332.972	258.294
																																									472.172	329.854	264.304
																																									434.787	306.848	237.602
																																									444.978	308.844	252.821
	-bkg roll ball 50, select slide, NO PROJ, measure on structure line scan 6pixel and bkg 13 pix				-bkg roll ball 50, select slide, NO PROJ, measure on structure line scan 6pixel and bkg 13 pix				-bkg roll ball 50, select slide, NO PROJ, measure on structure line scan 6pixel and bkg 13 pix				-bkg roll ball 50, select slide, NO PROJ, measure on structure line scan 6pixel and bkg 13 pix				-bkg roll ball 50, select slide, NO PROJ, measure on structure line scan 6pixel and bkg 13 pix				-bkg roll ball 50, select slide, NO PROJ, measure on structure line scan 6pixel and bkg 13 pix				-bkg roll ball 50, select slide, NO PROJ, measure on structure line scan 6pixel and bkg 13 pix				-bkg roll ball 50, select slide, NO PROJ, measure on structure line scan 6pixel and bkg 13 pix				-bkg roll ball 50, select slide, NO PROJ, measure on structure line scan 6pixel and bkg 13 pix				-bkg roll ball 50, select slide, NO PROJ, measure on structure line scan 6pixel and bkg 13 pix				-bkg roll ball 50, select slide, NO PROJ, measure on structure line scan 6pixel and bkg 13 pix				-bkg roll ball 50, select slide, NO PROJ, measure on structure line scan 6pixel and bkg 13 pix				-bkg roll ball 50, select slide, NO PROJ, measure on structure line scan 6pixel and bkg 13 pix
	ROI 26				ROI 24				ROI 22				ROI 20 TILTED				ROI 19				ROI 17 TILTED				ROI 14 TILTED				ROI 12 TILTED				ROI 11				ROI 9				ROI 8 TILTED				ROI 7				ROI 6 TILTED
	1 slide				1 slide				1 slide				1 slide				1 slide				1 slide				1 slide				1 slide				1 slide				1 slide				1 slide				1 slide				1 slide
			923.121				724.898				405.952				892.195				640.634				775.134				934.552				1360.48				1266.21				1033.96				1139.69				598.868
			920.237				718.801				405.303				886.012				630.985				768.934				939.95				1348.97				1252.79				1033.75				1106.23				604.353
			909.353				677.638				398.815				876.435				607.705				755.456				912.305				1304.53				1224.19				996.252				1058.59				586.203
	469.42	325.373	267.517		686.128	451.941	434.919		553.947	484.822	128.376		1135.7	750.815	714.782		510.553	361.324	277.14		477.208	445.797	58.3336		752.466	599.236	284.57		640.704	488.642	282.402		1785.45	1309.02	884.808		1012.93	714.222	554.741		905.205	657.53	459.968		786.667	590.769	363.81		1098.64
	608.73	423.434	344.121		687.604	464.007	415.252		655.416	563.449	170.795		1184.53	785.015	741.961		623.784	422.129	374.502		636.952	557.02	148.446		926.058	723.566	376.056		812.795	607.021	382.152		1830.17	1318.99	949.337		1029.61	723.271	568.918		1175.43	823.858	652.928		854.676	631.176	415.072		1284.75
	778.021	489.8	535.268		832.235	550.182	523.812		733.246	600.526	246.479		1308.75	816.526	914.137		771.429	507.577	490.011		815.085	646.483	313.118		1162.08	895.896	494.347		959.988	707.513	468.882		2094.1	1434.92	1224.19		1127.35	803.316	601.769		1507.63	998.75	945.066		986.085	700.747	529.915		1418.28
	1015.81	637.129	703.266		1016.35	629.304	718.801		827.524	661.83	307.716		1283.89	811.963	876.435		912.611	572.85	630.985		1036.88	781.815	473.696		1428.5	1023.2	752.713		1254.35	881.698	692.067		2193.47	1481.82	1321.65		1308.25	924.654	712.398		1739.75	1144.09	1106.23		1005.29	695.224	575.83		1624.48
	1171.69	727.296	825.296		1082.92	663.858	778.256		846.154	655.489	354.093		1250.87	773.791	886.012		951.012	583.128	683.214		1271.23	898.825	691.604		1604.33	1134.25	873.002		1544.94	1058.82	902.795		2109.16	1434.58	1252.79		1548.56	1079.68	870.774		1835.16	1159.79	1254.25		976.804	670.86	568.182		1790.98
	1271.81	785.189	903.723		1003.6	638.713	677.638		862.299	664.363	367.595		1114.53	723.293	726.576		924.194	596.969	607.705		1394.77	980.725	768.934		1633.52	1161.13	877.304		1812.74	1177.72	1179.33		2023.48	1367.55	1218.15		1663.52	1130.27	990.334		1651.77	1081.76	1058.59		919.048	644.323	510.203		1817.78
	1275.85	769.819	939.773		940.375	610.421	612.772		869.695	686.149	340.871		1074.23	695.063	704.171		902.026	592.514	574.807		1439.79	1008.48	801.011		1672.51	1160.21	951.401		1920.28	1217.84	1304.53		1963.04	1318.95	1196.17		1698.98	1142.35	1033.75		1494.98	982.381	951.968		945.772	630.125	586.203		1797.87
	1284.63	789.114	920.237		920.14	581.628	628.665		832.808	652.83	334.247		1001.03	651.932	648.316		905.357	594.865	576.629		1408.17	1001.38	755.456		1614.87	1108.74	939.95		2010.1	1241.21	1427.93		1887.3	1273.06	1140.74		1683.4	1106.23	1071.87		1366.58	916.726	835.44		923.058	621.636	559.784		1728.61
	1250.03	760.375	909.353		871.628	539.539	616.737		841.497	642.953	368.724		964.854	632.441	617.338		877.927	606.948	503.246		1396.22	990.373	753.721		1542.02	1050.78	912.305		1935.79	1209.42	1348.97		1743.33	1184.51	1037.81		1571.05	1039.31	987.522		1250.96	844.452	754.949		924.586	598.253	606.048		1607.07
	1263.36	781.346	895.175		816.68	522.826	545.729		835.029	620.282	398.815		979.02	642.545	624.883		882.466	615.513	495.77		1325.75	963.55	672.667		1337.55	933.551	750.291		1785.16	1150.77	1178.16		1708.09	1165.2	1008.22		1509.78	973.336	996.252		1173.04	790.459	710.503		965.82	640.399	604.353		1530.76
	1220.71	753.505	867.664		830.696	514.27	587.649		802.793	596.957	382.266		956.695	643.391	581.85		889.755	617.258	506.066		1128.07	885.881	449.785		1278.46	884.534	731.576		1678.13	1088.53	1094.96		1573.02	1092.28	892.802		1419.72	936.222	897.922		1200.76	796.576	750.629		895.948	591.735	564.966		1422.39
	1208.47	746.4	858.13		801.508	509.57	542.171		764.37	546.13	405.303		934.335	626.657	571.402		865.734	634.396	429.626		974.928	796.39	331.569		1222.38	861.305	670.572		1537.79	1032.01	939.319		1505.83	1029.68	884.287		1395.44	922.923	877.536		1155.72	787.725	683.425		859.68	563.622	549.822		1338.87
	1166.76	733.669	804.316		757.431	484.033	507.739		778.389	555.608	413.737		894.142	605.691	535.694		829.056	610.638	405.635		856.323	724.645	244.546		1213.89	848.935	677.779		1405.3	953.638	838.803		1436.46	986.824	835.033		1365.57	905.014	855.322		1114.81	750.971	675.708		817.913	530.913	533		1243.04
	1092.11	704.067	720.644		734.422	465.168	500.043		747.88	547.22	372.654		844.917	572.203	506.468		811.943	597.291	398.641		717.899	628.575	165.888		1092.24	791.659	558.218		1278.81	897.725	707.73		1352.43	928.066	788.1		1349.54	889.571	854.228		1034.78	690.712	638.981		764.154	495.448	499.025		1197.38
	1070.12	694.356	697.838		735.22	466.998	498.126		704.614	524.203	335.05		839.673	583.401	475.935		787.705	592.284	362.924						1024.63	758.948	493.404		1138.37	820.493	590.345		1315.78	913.495	747.092		1330.49	868.937	857.176		1001.03	680.749	594.801		716.459	491.437	417.899		1123.95
	1024.26	672.465	653.337		704.957	446.447	480.09		664.13	490.105	323.19		790.009	563.976	419.775		764.763	589.039	326.344						960.79	721.598	444.214						1215.93	867.763	646.599		1309.35	861.857	831.063		932.401	664.523	497.488		684.73	458.542	420.063		1031.09
	977.743	653.522	602.125		685.068	446.098	443.801		645.21	483.208	300.862		774.737	556.834	404.678		730.537	565.122	307.2						900.899	681.757	406.978						1204.35	858.814	641.703		1291.51	828.283	860.283		891.469	630.991	483.746		674.311	464.727	389.226		977.403
	952.137	647.783	565.23		640.208	418.851	411.091		642.28	470.648	318.746		722.735	515.611	384.657		756.471	570.496	345.382						819.469	631.539	349.012						1133.25	804.391	610.735		1205.56	790.357	771.095		813.621	593.456	408.879		656.576	456.146	372.226		896.711
	896.196	628.008	498.063		594.62	402.383	357.012		588.71	431.339	292.26		729.565	517.503	393.829		746.106	577.568	313						795.494	626.467	313.907						1068.65	773.069	548.935		1205.25	780.721	788.405		753.876	564.961	350.841		619.01	430.848	349.444		787.431
	872.851	614.136	480.469		555.137	370.82	342.303		574.969	428.183	272.603		699.707	506.851	358.162		714.439	557.962	290.602						764.665	597.745	309.995						1017.71	734.327	526.292		1184.71	765.756	778.056		761.672	573.326	349.785		615.224	431.893	340.47		825.408
	782.021	587.112	361.974		498.15	335.005	302.984		584.539	424.32	297.55		688.681	494.762	360.135		740.665	578.709	300.775						735.083	601.718	247.678						991.392	725.887	493.08		1158.49	758.905	742.086		728.359	556.422	319.312		578.615	401.952	328.088		761.412
	740.853	567.404	322.119		515.841	338.644	329.08		505.135	377.497	237.042		616.341	464.151	282.639		719.574	559.131	297.964						675.081	567.58	199.645						956.643	680.359	513.097		1083.27	717.062	680.103		688.266	543.583	268.696		544.821	398.613	271.528		768.285
	672.287	537.201	250.874		542.157	361.732	335.075		513.588	396.692	217.093		588.035	452.859	251.041		701.738	543.897	293.134						688.673	577.215	206.993						884.533	647.949	439.371		982.9	669.68	581.696						508.038	360.121	274.703		728.125
	613.566	507.469	197.037		498.419	341.867	290.738		495.053	381.707	210.5		571.078	421.568	277.662		609.045	495.867	210.187								0						833.394	609.345	416.091		959.989	641.366	591.727						463.111	338.72	231.011		647.656
	500.773	435.059	122.041		492.901	339.688	284.538		505.766	388.202	218.335		548.239	407.547	261.285		620.671	515.045	196.163														747.353	575.058	319.977		891.488	599.84	541.631						479.284	329.187	278.752		593.767
	473.152	417.662	103.052		439.854	317.835	226.606		501.499	373.244	238.188		494.988	388.401	197.946		613.239	492.956	223.383														734.116	548.562	344.601		788.332	557.008	429.6						405.41	309.473	178.168		584.412
	393.922	359.062	64.7398		431.025	314.614	216.191		445.83	354.355	169.884		493.659	385.769	200.367		624.929	495.611	240.162														668.335	493.017	325.589		713.535	498.496	399.357						368.6	275.984	172.002		557.351
	340.267	329.556	19.8928		386.256	285.054	187.946		432.004	333.819	182.344		464.289	381.89	153.027		618.633	493.892	231.663														643.407	482.485	298.856		603.309	436.876	309.091						331.365	269.321	115.224		485.798
					416.646	290.015	235.172		408.392	317.748	168.34		449.575	364.128	158.686		608.075	483.501	231.352														592.47	449.278	265.928		578.289	407.804	316.616						266.961	241.174	47.8892
					416.233	292.675	229.464		373.204	278.931	175.078		453.047	358.752	175.12		592.911	474.781	219.383																		523.557	376.499	273.107						275.461	232.496	79.7927
					412.519	284.736	237.31		355.157	269.077	159.863		431.776	362.331	128.969		593.532	485.119	201.338																		425.408	328.773	179.465						227.142	208.59	34.4541
					354.857	275.128	148.068		317.033	252.806	119.279		420.269	342.181	145.02		554.103	462.687	169.772																		375.107	309.615	121.629						230.168	198.168	59.4288
					324.093	249.754	138.058		288.862	228.22	112.62		403.986	338.76	121.134		547.953	450.443	181.091																		319.139	272.416	86.7711						200.458	182.511	33.329
					317.222	242.922	137.985		223.286	190.92	60.1096		417.084	351.673	121.477		535.52	433.821	188.869																		277.238	250.281	50.0632						167.642	145.943	40.298
					327.66	245.769	152.084		210.916	167.507	80.615		407.271	343.139	119.103		515.367	422.678	172.137																		272.593	246.464	48.5245
					294.722	223.756	131.795		191.376	170.43	38.8986		396.669	326.307	130.672		520.913	413.286	199.878
					284.031	222.77	113.771						383.77	322.463	113.856		503.346	409.509	174.268
					273.445	212.717	112.78						334.625	299.546	65.1482		482.423	396.739	159.128
					267.776	210.332	106.682						294.238	266.214	52.044		467.375	390.594	142.594
					262.263	196.179	122.728						324.542	276.899	88.4793		433.885	369.347	119.857
					260.138	194.13	122.587						304.738	265.305	73.2318		403.891	341.899	115.129
					281.391	205.335	141.247						265.419	238.451	50.0827		401.153	351.097	92.9617
					253.241	187.321	122.422						271.247	234.802	67.6832		370.162	320.587	92.0684
																	372.992	334.066	72.2924
																	369.876	317.21	97.8081
																	345.726	305.236	75.1946
	-bkg roll ball 50, select slide, NO PROJ, measure on structure line scan 6pixel and bkg 13 pix				-bkg roll ball 50, select slide, NO PROJ, measure on structure line scan 6pixel and bkg 13 pix				-bkg roll ball 50, select slide, NO PROJ, measure on structure line scan 6pixel and bkg 13 pix				-bkg roll ball 50, select slide, NO PROJ, measure on structure line scan 6pixel and bkg 13 pix
	ROI 6				ROI 3 TILTED				ROI 2 TILTED				ROI 1
	1 slide				1 slide				1 slide				1 slide
			889.122				1320.66				826.991				1022.03
			875.609				1323.73				813.154				1021.38
			863.342				1298.64				806.834				1021
	1037.22	727.429	575.327		1079.86	780.046	556.806		828.722	625.597	377.232		636.987	442.106	361.923
	1164.79	797.165	682.724		1438	954.738	897.493		820.341	613.615	383.92		836.871	561.665	511.098
	1357.11	892.235	863.342		1770.56	1131.43	1186.96		797.062	581.202	400.881		1017.24	661.617	660.436
	1401.35	901.432	928.417		1957.81	1245.03	1323.73		890.483	631.77	480.467		1217.8	776.972	818.677
	1321.69	850.208	875.609		1998.99	1277.66	1339.61		1135.87	774.259	671.557		1305.08	835.048	872.917
	1159.12	778.039	707.731		1922.43	1223.16	1298.64		1302.85	868.4	806.834		1281.24	836.54	825.875
	1143.95	764.855	704.03		1800.91	1190.67	1133.31		1383	919.394	860.985		1305.04	847.982	848.83
	1068.27	723.546	640.206		1605.36	1091.57	954.184		1307.72	869.871	813.154		1397.96	888.527	946.081
	994.481	676.448	590.632		1464.79	1027.62	811.893		1187.12	810.523	699.395		1408.37	896.846	949.966
	897.188	623.375	508.51		1259.1	929.353	612.392		1173.16	805.03	683.663		1434.7	910.119	974.226
	844.877	600.503	453.838		1147.56	859.495	534.973		1122.6	777.235	641.397		1463.94	939.77	973.457
	816.779	578.143	443.181		1019.43	813.634	382.201		1051.05	755.643	548.617		1484.54	934.77	1021
	783.087	564.06	406.766		931.124	752.002	332.655		1020.61	739.572	521.921		1443.19	938.254	937.745
	776.375	548.711	422.804						1028.27	712.991	585.524		1435.65	923.525	951.087
	778.582	531.206	459.413						971.642	684.931	532.463		1473.39	933.34	1002.95
	726.153	498.134	423.463						959.873	695.4	491.164		1470.08	920.103	1021.38
	746.711	513.569	432.979										1511.27	960.043	1023.71
	739.83	517.587	412.738										1425.86	916.318	946.298
	731.745	506.592	418.141										1389.44	877.776	950.229
	723.805	491.407	431.596										1295	820.568	881.094
	718.125	485.75	431.555										1306.77	824.359	895.909
	688.517	466.456	412.399										1247.75	801.753	828.289
	627.736	441.309	346.221										1213.82	764.435	834.577
	657.713	458.401	370.15										1251.36	794.226	848.965
	654.332	449.627	380.165										1236.95	777.733	852.826
	605.997	437.593	312.75										1206.17	780.844	789.898
	610.995	431.561	333.236										1158.06	746.413	764.495
	603.568	438.588	306.391										1144.13	745.935	739.51
	592.877	425.243	311.321										1099.15	724.627	695.547
	586.842	421.727	306.642										1026.94	687.096	631.132
	537.173	384.044	284.383										972.225	659.544	580.693
	490.28	360.088	241.785										856.411	606.231	464.62
	410.862	314.053	179.789										793.651	568.763	417.65
	342.048	276.104	122.467										770.495	554.237	401.623
	292.125	243.364	90.5563										653.023	498.027	287.85
													609.613	456.772	283.847
													552.261	435.865	216.165
													458.933	358.49	186.538
	-bkg roll ball 50, select slide, NO PROJ, measure on structure line scan 6pixel and bkg 13 pix				-bkg roll ball 50, select slide, NO PROJ, measure on structure line scan 6pixel and bkg 13 pix				-bkg roll ball 50, select slide, NO PROJ, measure on structure line scan 6pixel and bkg 13 pix				-bkg roll ball 50, select slide, NO PROJ, measure on structure line scan 6pixel and bkg 13 pix				-bkg roll ball 50, select slide, NO PROJ, measure on structure line scan 6pixel and bkg 13 pix
	ROI 24				ROI 22 TILTED				ROI 21 TILTED				ROI 19 TILTED				ROI 18 TILTED
	1 slide				1 slide				1 slide				1 slide				1 slide
			735.313				736.43				554.344				1193.23				814.849
			721.27				739.526				557.66				1183.46				818.114
			706.588				713.524				542.257				1182.06				802.437
	1099.46	870.519	425.18		718.438	507.78	391.222		457.795	308.62	277.039		738.369	522.562	400.786		931.108	708.033	414.281
	1229.34	917.232	579.626		934.203	636.58	552.729		523.894	350.438	322.133		785.616	590.176	362.961		1116.47	811.582	566.23
	1314.83	926.452	721.27		1158.19	784.536	693.93		739.577	470.417	499.867		978.895	706.791	505.335		1251.51	897.721	657.033
	1295.25	914.783	706.588		1242.14	834.937	756.24		846.601	543.385	563.115		1259.93	904.191	660.654		1350.11	950.624	741.899
	1290.22	871.254	778.082		1239.63	841.425	739.526		857.763	557.484	557.66		1521.44	1040.38	893.403		1438.97	998.444	818.114
	1161.98	791.587	687.872		1190.37	806.163	713.524		827.994	536.009	542.257		1678.23	1123.05	1031.06		1456.52	1012.83	823.998
	1148.51	780.896	682.71		1091.67	766.851	603.234		782.388	518.322	490.408		1716.66	1138.37	1073.98		1391.13	959.044	802.437
	1128.4	765.824	673.351		1002.08	701.175	558.816		764.393	521.99	450.176		1658.76	1077.87	1078.8		1278.96	896.012	711.189
	1108.41	761.729	643.834		941.353	650.952	539.317		710.087	495.502	398.515		1689.55	1099.56	1095.68		1156.6	829.49	607.489
	1092.16	757.795	620.963		894.61	622.963	504.488		694.02	476.887	403.247		1717.07	1079.83	1183.46		998.716	732.345	494.689
	1045.97	713.111	618.174		834.013	584.958	462.531		655.972	440.589	399.997		1734.84	1098.35	1182.06		867.35	646.322	410.48
	964.126	684.94	518.488		842.992	563.036	519.92		623.046	419.324	378.34		1695.04	1041.25	1214.18		733.234	565.05	312.342
	961.557	660.358	559.37		808.318	559.44	462.202		622.226	427.936	360.824		1562.54	986.685	1069.45		627.756	503.761	230.277
	912.547	639.269	507.516		784.078	535.084	462.418		600.862	417.891	339.803		1416.6	908.229	944.109		565.427	458.967	197.71
	920.708	643.773	514.307		741.946	521.369	409.642		562.555	396.569	308.26		1216.07	806.284	761.023
	902.842	627.143	512.013		725.757	503.016	413.662		526.715	381.648	269.41
	831.618	589.114	450.364		740.78	513.12	422.797		584.988	418.945	308.365
	809.205	574.007	436.796		705.552	492.614	395.456		549.637	401.864	274.436
	830.41	590.989	444.639		606.812	447.552	295.767		529.947	382.203	274.381
	714.89	518.494	364.735		575.312	436.354	258.065		489.935	361.618	238.303
	704.826	504.462	372.106		562.231	412.644	277.804		435.007	335.443	184.904
	699.085	486.788	394.265		500.955	402.642	182.581		396.658	322.029	138.597
	662.974	496.807	308.595		444.973	368.729	141.596
	630.029	471.452	294.499
	605.726	464.385	262.49
	571.189	434.102	254.59
	574.174	426.039	275.108
	502.439	389.098	210.49
	455.497	365.477	167.179
	462.635	358.894	192.662
	423.406	357.213	122.929
	376.338	317.563	109.154
	348.257	294.688	99.4858
	331.441	275.66	103.593
	298.935	248.62	93.4431
	291.466	235.35
[truncated: 2 more columns]

## Sheet: diploid hetero Y1224 4d
	-bkg roll ball 50, select slide, NO PROJ, measure on structure line scan 6pixel and bkg 13 pix				-bkg roll ball 50, select slide, NO PROJ, measure on structure line scan 6pixel and bkg 13 pix				-bkg roll ball 50, select slide, NO PROJ, measure on structure line scan 6pixel and bkg 13 pix				-bkg roll ball 50, select slide, NO PROJ, measure on structure line scan 6pixel and bkg 13 pix				-bkg roll ball 50, select slide, NO PROJ, measure on structure line scan 6pixel and bkg 13 pix				-bkg roll ball 50, select slide, NO PROJ, measure on structure line scan 6pixel and bkg 13 pix				-bkg roll ball 50, select slide, NO PROJ, measure on structure line scan 6pixel and bkg 13 pix				-bkg roll ball 50, select slide, NO PROJ, measure on structure line scan 6pixel and bkg 13 pix				-bkg roll ball 50, select slide, NO PROJ, measure on structure line scan 6pixel and bkg 13 pix				-bkg roll ball 50, select slide, NO PROJ, measure on structure line scan 6pixel and bkg 13 pix				-bkg roll ball 50, select slide, NO PROJ, measure on structure line scan 6pixel and bkg 13 pix				-bkg roll ball 50, select slide, NO PROJ, measure on structure line scan 6pixel and bkg 13 pix				-bkg roll ball 50, select slide, NO PROJ, measure on structure line scan 6pixel and bkg 13 pix
	ROI 38				ROI 37 TILTED				ROI 35 TILTED				ROI 34				ROI 33 TILTED				ROI 31 TILTED				ROI 29				ROI 25				ROI 24				ROI 23 TILTED				ROI 9				ROI 8				ROI 6 TILTED
	1 slide				1 slide				1 slide				1 slide				1 slide				1 slide				1 slide				1 slide				1 slide				1 slide				1 slide				1 slide				1 slide
			493.75				409.687				560.505				465.892				761.728				502.734				730.278				916.76				1247.59				1200.86				445.205				672.346
			491.328				409.903				560.416				469.956				767.68				499.57				744.08				918.035				1246.1				1181.55				455.535				674.487
			488.134				408.534				557.203				450.473				748.852				495.554				699.698				913.393				1201.33				1181.44				414.556				653.172
	742.843	536.465	383.274		421.45	359.029	115.925		593.495	443.858	277.897		489.24	345.894	266.213		720.956	512.49	387.149		448.245	338.5	203.812		702.696	485.969	402.493		501.51	351.938	277.777		1180.64	764.842	772.203		1084.19	813.202	503.267		692.403	493.909	368.632		798.265	632.077	308.636		1278.67
	796.146	586.859	388.677		552.52	423.616	239.394		733.432	520.761	394.961		573.78	400.499	321.808		920.454	645.032	511.497		565.76	400.692	306.554		858.649	579.632	518.175		725.568	489.623	438.184		1518.54	956.603	1043.6		1336.53	937.362	741.313		750.71	527.488	414.556		922.085	672.259	463.963		1459.81
	860.955	610.088	465.895		649.424	477.943	318.465		942.882	641.12	560.416		741.354	498.792	450.473		1176.69	789.97	718.2		735.661	485.999	463.658		1019.65	666.416	656.001		952.539	619.3	618.872		1787.6	1140.74	1201.33		1571.45	1059.37	950.999		782.765	532.099	465.523		1054.01	728.854	603.857		1686.32
	851.839	587.278	491.328		736.188	519.004	403.344		984.548	680.912	563.897		796.503	539.523	477.248		1279.17	865.806	767.68		837.628	561.356	513.077		1052.72	680.696	690.905		1160.86	742.936	776.139		1919.37	1221.88	1295.35		1718.35	1158.54	1039.66		780.935	535.647	455.535		1088.65	725.464	674.487		1698.26
	844.062	582.916	484.987		769.314	548.209	410.625		979.728	679.695	557.203		811.564	558.511	469.956		1264.96	861.972	748.414		824.923	555.924	499.57		1034.03	674.153	668.343		1226.62	782.274	825.22		1855.81	1184.83	1246.1		1824.18	1187.95	1181.55		742.688	527.699	399.265		1074.05	702.846	689.381		1661.38
	860.177	597.336	488.134		759.295	540.544	406.252		960.454	668.108	542.928		747.731	516.207	429.973		1256.65	842.766	768.651		816.353	549.516	495.554		1001.84	633.513	684.035		1253.71	787.12	866.528		1751.14	1111.64	1187.65		1800.54	1164.38	1181.44		725.194	525.849	370.213		1007.32	655.607	653.172		1598.59
	827.27	579.525	460.097		765.683	544.966	409.903		931.932	653.745	516.634		705.322	487.824	403.926		1180.98	777.754	748.852		763.341	509.899	470.679		960.828	608.025	655.204		1292.98	805.55	905.229		1584.64	1024.95	1039.42		1852.16	1184.69	1239.58		670.17	473.082	366.021		936.256	633.077	563.047		1575.1
	842.463	583.571	480.8		737.292	517.312	408.534		925.847	657.648	498.083		687.916	474.705	395.964		1127.04	743.146	712.937		745.174	502.973	449.802		935.446	585.985	648.999		1294.49	802.659	913.393		1546.48	1004.4	1006.73		1742.62	1115.89	1163.92		651.609	463.825	348.743		899.511	601.224	553.962		1552.53
	867.711	597.518	501.788		703.364	487.228	401.397		925.804	655.51	501.975		685.543	463.557	412.259		1026.97	692.161	621.785		743.957	501.723	449.862		963.674	586.913	699.698		1271.96	787.708	899.321		1472.37	958.991	953.419		1752.13	1125.07	1164.53		682.363	469.723	394.904		883.241	586.593	550.918		1469.84
	805.065	572.982	431.011		674.463	476.924	366.858		822.191	594.719	422.448		674.375	445.471	425.108		990.48	672.821	589.936		707.775	491.886	400.936		987.922	585.66	747.057		1270.92	776.158	918.85		1414.33	931.863	896.007		1638.42	1068.45	1058.52		631.764	441.989	352.439		910.135	591.248	592.219		1380.22
	814.593	583.391	429.376		650.153	472.255	330.381		774.125	550.323	415.633		625.999	418.784	384.828		909.016	614.752	546.491		696.472	489.638	384.12		1013.66	613.004	744.08		1253.16	758.831	918.035		1412.21	930.114	895.313		1561.09	1028.05	989.929		616.367	420.954	362.911		862.147	571.13	540.462		1349.23
	750.91	552.704	368.097		645.383	470.862	324.112		756.33	554.691	374.472		620.641	415.457	381.057		869.962	608.195	486.139		719.819	507.824	393.706		965.9	592.758	692.978		1220.73	737.958	896.575		1338.01	897.197	818.657		1487.16	970.731	959.087		628.647	418.374	390.507		853.383	556.1	552.096		1212.43
	739.979	536.506	377.878		606.981	454.186	283.761		715.666	522.267	359.17		615.748	419.2	365.016		799.931	565.548	435.282		668.285	469.447	369.27		966.008	601.181	677.535		1117.27	668.728	833.01		1314.91	866.835	832.14		1446.53	957.644	907.925		609.403	417.999	355.464		823.699	558.467	492.574		1071.08
	716.939	518.269	368.958		598.209	447.946	279.06		660.503	508.908	281.534		563.074	397.597	307.313		756.769	541.317	400.127		629.624	452.462	329.015		939.854	590.943	647.977		1017.11	621.516	734.675		1287.69	838.027	835.082		1303.14	881.261	783.481		632.465	435.56	365.68		782.498	533.603	462.234		1016.03
	648.132	501.046	273.16		596.58	431.955	305.73		618.755	469.2	277.744		572.331	399.27	321.399		709.197	526.904	338.543		634.204	453.822	334.995		940.68	585.356	659.887		909.426	556.023	656.319		1194.84	800.746	731.891		1172.02	807.586	676.816		612.923	410.282	376.334		747.027	506.106	447.425		922.512
	642.955	498.509	268.257		595.164	444.665	279.5		562.173	415.379	272.616		536.148	374.492	300.218		681.18	494.125	347.387		590.76	424.329	309.086		863.243	556.998	568.741		778.364	488.417	538.472		1241.64	809.117	803.257		1008.77	705.575	563.074		587.551	396.144	355.471		684.77	486.973	367.339		911.055
	615.38	481.625	248.402		581.506	432.88	276.02		554.277	414.783	259.06		464.434	337.243	236.212				0		550.539	413.012	255.407		827.005	538.057	536.617		712.963	455.819	477.554		1211.87	787.646	787.852		979.392	687.331	542.401		573.648	367.748	382.386		685.722	467.207	405.813		787.393
	645.471	492.867	283.406		531.697	411.337	223.525		513.44	390.496	228.325		450.999	324.485	234.954				0		522.686	412.884	203.918		815.355	529.293	531.259		699.332	444.344	473.549		1192.85	766.005	792.714		928.812	651.388	515.215		559.283	380.451	332.118		623.913	431.257	357.789		709.963
	638.906	486.12	283.746		496.553	397.213	184.489		444.938	342.033	191.11		487.524	345.203	264.311				0				0		805.703	532.811	506.799		619.664	420.582	369.724		1123.77	722.065	746.015		810.926	597.927	395.57		569.188	373.023	364.307		583.126	398.923	342.092		696.109
	635.631	470.302	307.039		471.981	373.002	183.819		441.762	332.787	202.382		441.002	336.68	193.742				0				0		764.472	508.505	475.367		622.508	405.81	402.439		1096.73	706.734	724.276						523.522	347.943	326.076		539.729	385.402	286.607		664.138
	633.53	481.505	282.333		401.087	328.794	134.259		431.986	338.918	172.84		435.74	324.988	205.682				0				0		732.718	499.428	433.253		622.227	408.515	396.894		1016.17	678.612	626.89						470.702	335.094	251.843		511.069	372.61	257.138		599.248
	608.619	459.774	276.428		391.231	312.577	146.071		392.159	306.507	159.069		427.645	319.124	201.54				0				0		665.971	462.943	377.052		610.831	396.434	398.166		980.967	647.956	618.449						460.896	318.55	264.355		498.061	360.9	254.728
	563.46	438.662	231.767				0		370.476	304.503	122.52		406.037	311.36	175.828				0				0		650.583	457.609	358.38		574.723	370.307	379.63		1015.91	665.584	650.599						417.471	305.978	207.058		485.554	347.394	256.583
	523.171	407.308	215.174				0		363.489	284	147.622		369.032	290.13	146.532				0				0		623.935	453.916	315.748		563.149	380.973	338.328		988.584	663.706	603.344						366.474	278.777	162.865		477.852	341.011	254.132
	495.774	378.526	217.748				0		332.432	279.107	99.0323		365.438	290.716	138.77				0				0		595.848	416.389	333.282		515.135	348.387	309.674		1015.37	668.242	644.661						374.257	269.062	195.362		408.96	306.827	189.675
	449.156	354.448	175.887				0		296.546	246.918	92.1678		380.972	293.139	163.118				0				0		545.819	389.877	289.607		458.995	314.988	267.442		970.908	644.966	605.321						324.491	243.007	151.327		367.749	288.124	147.874
	450.677	351.314	184.531				0		298.926	245.405	99.3974		395.658	294.528	187.813				0				0		492.746	368.973	229.864		412.057	300.191	207.75		954.596	634.991	593.552						306.606	235.229	132.558		329.543	267.475	115.269
	408.662	326.11	153.311				0		282.913	249.088	62.8184		363.522	273.131	167.868				0				0		465.632	359.844	196.462		366.431	272.991	173.531		933.8	616.009	590.182						306.971	237.391	129.22		267.94	217.461	93.7475
	408.035	318.473	166.33				0		301.355	248.013	99.0637		338.546	249.629	165.132				0				0		425.754	330.695	176.539		347.023	258.041	165.252		935.034	605.482	612.025						329.318	248.238	150.577		218.964	195.526	43.5279
	353.557	272.586	150.376				0				0		329.596	247.063	153.275				0				0		410.832	309.825	187.585		286.623	236.695	92.7234		898.885	601.826	551.682						280.337	219.845	112.343		219.728	194.009	47.7639
	329.955	262.258	125.722				0				0		312.073	233.434	146.045				0				0		329.705	255.004	138.731		310.231	239.158	131.993		891.454	602.146	537.285						260.115	213.578	86.4259				0
													267.238	198.825	127.052				0				0				0		294.836	216.928	144.686		892.415	618.154	509.341						268.299	222.255	85.5094				0
													273.415	203.174	130.448				0				0				0				0		883.408	621.692	486.043						199.052	184.85	26.3763				0
													266.332	189.836	142.065				0				0				0				0		895.88	622.592	507.536						185.608	167.604	33.4367				0
													226.391	180.439	85.3389				0				0				0				0		846.841	582.438	491.034						211.933	169.857	78.1415				0
													205.328	142.078	117.465				0				0				0				0		826.024	579.763	457.342						168.889	154.627	26.4869				0
													197.26	133.805	117.845				0				0				0				0		807.388	559.067	461.169
													146.116	117.171	53.7539				0				0				0				0		724.971	522.095	376.771
															0				0				0				0				0		671.369	482.17	351.37
																																	676.496	479.538	365.779
																																	618.339	455.301	302.785
																																	543.041	402.288	261.4
																																	488.546	383.638	194.83
																																	424.206	358.419	122.176
																																	366.175	304.75	114.075
																																	293.137	259.372	62.7066
																																	266.579	247.843	34.7947
	-bkg roll ball 50, select slide, NO PROJ, measure on structure line scan 6pixel and bkg 13 pix				-bkg roll ball 50, select slide, NO PROJ, measure on structure line scan 6pixel and bkg 13 pix				-bkg roll ball 50, select slide, NO PROJ, measure on structure line scan 6pixel and bkg 13 pix				-bkg roll ball 50, select slide, NO PROJ, measure on structure line scan 6pixel and bkg 13 pix				-bkg roll ball 50, select slide, NO PROJ, measure on structure line scan 6pixel and bkg 13 pix				-bkg roll ball 50, select slide, NO PROJ, measure on structure line scan 6pixel and bkg 13 pix				-bkg roll ball 50, select slide, NO PROJ, measure on structure line scan 6pixel and bkg 13 pix				-bkg roll ball 50, select slide, NO PROJ, measure on structure line scan 6pixel and bkg 13 pix				-bkg roll ball 50, select slide, NO PROJ, measure on structure line scan 6pixel and bkg 13 pix				-bkg roll ball 50, select slide, NO PROJ, measure on structure line scan 6pixel and bkg 13 pix				-bkg roll ball 50, select slide, NO PROJ, measure on structure line scan 6pixel and bkg 13 pix				-bkg roll ball 50, select slide, NO PROJ, measure on structure line scan 6pixel and bkg 13 pix				-bkg roll ball 50, select slide, NO PROJ, measure on structure line scan 6pixel and bkg 13 pix
	ROI 22				ROI 21 TILTED				ROI 20				ROI 19 TILTED				ROI 18				ROI 17				ROI 16 TILTED				ROI 15 TILTED				ROI 14				ROI 13				ROI 11				ROI 10 TILTED				ROI 4
	1 slide				1 slide				1 slide				1 slide				1 slide				1 slide				1 slide				1 slide				1 slide				1 slide				1 slide				1 slide				1 slide
			924.134				659.413				643.842				1034.96				597.462				679.314				772.347				580.522				621.07				532.364				669.502				699.055
			920.781				657.992				645.134				1033.15				594.327				686.32				769.324				581.539				623.915				531.914				664.511				700.988
			893.118				629.213				639.362				1032.56				567.937				658.805				743.749				575.862				607.221				528.131				660.09				694.955
	959.264	707.609	467.36		922.071	691.856	427.542		816.774	559.363	478.049		901.579	697.429	379.135		445.494	328.757	216.797		592.486	415.976	327.804		686.719	472.251	398.298		457.823	323.139	250.127		797.415	586.417	391.853		855.572	650.84	380.216		1020.05	752.848	496.224		426.613	318.051	201.615		875.153
	1201.81	835.231	680.795		1127.4	794.98	617.351		991.11	672.026	592.583		964.807	725.883	443.717		634.131	442.013	356.79		769.249	508.102	484.986		849.821	561.822	534.855		633.318	432.977	372.063		913.379	662.613	465.708		985.76	739.001	458.267		1242.55	910.678	616.334		504.747	362.503	264.169		997.491
	1327.63	894.935	803.581		1209.65	855.343	657.992		1072.1	724.72	645.134		1168.42	812.754	660.521		795.771	537.036	480.507		940.981	608.859	616.797		1006.36	654.737	653.021		786.138	537.958	460.904		1024.32	742.302	523.747		1076.49	801.041	511.542		1340.6	985.167	660.09		659.876	446.278	396.682		1061.32
	1384.54	924.87	853.675		1202.15	830.053	691.033		1094.61	750.335	639.362		1324.45	880.677	824.146		992.564	686.752	567.937		1012.56	665.568	644.414		1150.06	717.15	803.966		920.527	605.977	584.163		1166.53	826.186	632.074		1051.02	810.507	446.66		1368.8	1010.99	664.511		821.883	550.398	504.186		1073.27
	1416.76	935.853	893.118		1094.04	755.232	629.213		1065.46	717.061	647.029		1493.76	937.773	1032.56		1084.24	744.939	630.122		1079.09	709.533	686.32		1138.09	723.835	769.324		910.851	600.771	575.862		1160.71	824.754	623.915		974.861	749.406	418.702		1335.05	987.189	646.029		951.653	615.374	624.517		1081.45
	1478.81	962.691	958.504		1062.12	743.666	591.408		939.843	653.415	531.938		1490.69	931.125	1039.18		1084.98	764.954	594.327		1077.17	704.117	692.818		1061.3	677.047	713.609		935.683	630.239	567.254		1147.69	820.723	607.221		934.874	698.565	438.858		1251.07	914.318	625.403		972.442	613.625	666.374		1052.6
	1438.74	942.932	920.781		1003.72	695.634	572.151		921.562	631.563	538.571		1474.5	918.194	1033.15		1026.13	745.977	520.281		1025.92	671.179	658.805		1047.26	646.782	743.749		904.646	612.177	543.155		1094.23	782.556	578.815		882.08	655.817	420.203		1217.27	864.53	655.093		961.858	584.402	700.988		993.858
	1396.8	937.564	852.86		920.296	663.224	477.421		940.893	649.827	540.553		1393.8	894.589	927.108		980.97	732.203	461.997		996.284	683.837	580.259		985.346	617.963	682.284		887.832	574.696	581.539		1110.13	802.641	571.047		858.098	615.064	451.349		1178.53	810.272	683.905		915.439	574.699	632.802		995.264
	1382.27	937.13	826.696		877.183	628.24	462.322		949.961	635.946	583.171		1313.95	867.38	829.352		969.118	708.18	484.599		965.825	660.513	567.008		944.764	594.993	649.575		847.87	559.396	535.737		1039.85	770.395	500.407		892.491	620.97	504.254		1099.67	755.918	638.394		955.242	581.035	694.955		993.829
	1380.74	921.251	853.346		819.966	609.602	390.676		956.339	627.119	611.409		1274	849.502	788.354		956.77	686.832	501.312		983.737	686.351	552.29		914.353	596.958	589.447		870.291	581.271	536.752		1001.96	732.431	500.548		842.328	558.2	527.665		1061.24	711.07	650.321		978.814	605.855	692.638		976.929
	1387.35	924.498	859.581		746.036	558.02	349.171		910.974	602.118	573.59		1191.51	789.559	746.478		895.857	646.214	463.622		952.618	668.832	527.032		943.082	607.345	623.51		812.194	533.89	516.851		984.671	712.267	505.894		845.666	559.251	531.914		1028.76	691.374	626.571		992.646	615.065	701.222		922.626
	1274.19	854.651	779.141		739.541	556.685	339.59		852.036	574.034	516.289		1108.71	756.721	653.686		863.088	623.062	445.764		925.789	645.766	520.042		918.753	583.108	623.341		782.494	506.615	512.347		928.116	680.368	460.102		848.776	559.597	537.047		994.186	655.79	628.449		916.641	571.858	640.312		931.298
	1203.35	817.064	717.389		725.096	535.72	351.697		860.598	556.042	565.605		1053.97	749.02	566.343		860.269	600.288	482.821		910.459	629.006	522.699		935.99	597.068	629.427		745.858	477.83	497.767		907.603	659.312	461.112		814.773	530.394	528.131		922.453	610.246	579.814		918.722	580.535	628.061		903.442
	1153.86	777.713	698.55		732.503	542.549	352.771		827.327	549.343	516.257		937.904	682.479	474.362		826.163	561.55	491.423		808.92	564.516	453.893		896.131	579.592	587.857		708.677	455.316	470.528		868.787	639.019	426.712		822.659	542.206	520.841		898.909	580.967	590.465		899.276	549.266	650.019		894.088
	1071.05	735.301	623.533		727.786	546.803	336.113		842.219	537.642	565.643		912.948	672.107	447.276		815.971	562.622	470.505		871.234	623.617	459.86		853.714	568.286	530.081		726.796	439.783	533.026		864.785	646.658	405.094		798.871	525.914	506.92		830.982	558.999	505.111		886.6	550.376	624.416		846.586
	1050.39	717.067	619.031		722.463	562.717	296.671		819.934	532.838	533.177		808.343	600.702	385.619		799.374	553.743	456.171		824.466	598.453	419.737		818.838	541.365	515.308		678.539	428.546	464.272		841.302	640.354	373.19		768.854	533.211	437.622		835.353	544.67	539.839		854.371	551.771	561.971		809.105
	997.046	684.442	580.549		648.509	515.766	246.523		795.672	507.325	535.502		775.103	609.3	307.921		798.54	556.704	449.125		784.548	579.499	380.805		795.421	535.926	481.919		636.847	387.7	462.702		794.404	589.683	380.196		741.366	510.905	427.999		800.785	528.668	505.36		786.953	498.572	535.566		749.272
	1007.03	689.311	590.058		622.041	500.837	225.095		752.292	508.744	452.303		773.318	598.906	323.907		766.41	541.788	417.156		817.241	583.832	433.473		767.253	520.617	458.039		596.201	369.12	421.722		765.98	577.09	350.797		714.682	482.671	430.877		747.984	496.002	467.966		778.626	499.836	517.754		723.514
	955.6	643.749	579.15		591.304	487.537	192.71		768.467	510.263	479.522		741.639	582.044	296.391		722.179	502.966	407.109		774.988	537.583	440.895		713.862	502.166	393.15		617.892	387.046	428.715		742.859	552.966	352.659		689.606	454.845	435.984		696.268	459.028	440.587		694.887	466.41	424.314		701.337
	930.582	650.892	519.424				0		684.348	468.095	401.613		750.96	571.527	333.233		673.137	477.973	362.448		728.722	520.24	387.181		729.595	515.412	397.769				0		724.085	549.941	323.41		678.788	450.375	424.195		675.938	430.79	455.274		684.128	467.102	403.049		672.33
	905.867	625.861	520.012				0		653.508	425.679	423.111		703.152	558.57	268.51		682.814	484.226	368.806		695.835	504.193	355.907		672.5	492.79	333.749				0		667.882	507.719	297.444		669.493	454.168	399.888		598.038	396.561	374.17				0		630.993
	874.964	611.902	488.544				0		621.962	422.47	370.485		639.466	525.012	212.557		640.152	442.803	366.505		682.702	496.097	346.552		652.778	467.333	344.398				0		664.429	496.949	311.034		637.403	445.53	356.334		599.284	399.332	371.341				0		623.078
	811.053	575.024	438.34				0		588.329	392.11	364.406		592.933	499.644	173.251		619.015	441.428	329.805		613.014	449.932	302.866		651.775	475.784	326.84				0		631.107	481.913	277.074		627.124	428.211	369.411		552.615	365.903	346.75				0		568.275
	754.977	540.659	398.02				0		582.885	396.256	346.597		545.686	470.93	138.833		621.191	447.309	322.924		580.672	425.584	288.02		616.603	476.246	260.663				0		574.911	449.551	232.812		572.053	399.927	319.662		521.14	338.771	338.685				0		548.423
	728.49	530.645	367.427				0		540.862	360.752	334.489		512.256	443.063	128.502		587.852	423.065	306.034		591.598	438.579	284.178		569.782	451.331	219.981				0		570.752	440.033	242.763		585.665	407.629	330.637		490.958	321.029	315.582				0		489.303
	650.591	482.104	312.904				0		521.538	340.954	335.369		503.978	436.534	125.253		587.103	428.981	293.654		539.223	418.86	223.53		540.651	426.58	211.846				0		566.547	431.639	250.544		623.644	413.796	389.719		430.837	280.171	279.808				0		433.43
	607.242	454.259	284.111				0		470.605	302.17	312.808				0		549.162	383.37	307.899		519.141	404.104	213.641				0				0		557.218	413.156	267.544		578.749	397.42	336.755		408.262	267.142	262.081				0		383.405
	579.402	444.232	251.031				0		458.666	299.047	296.437				0		489.408	358.141	243.783		513.008	401.513	207.061				0				0		513.853	395.357	220.064		575.06	384.557	353.792		382.769	254.992	237.298				0
	526.226	408.275	219.052				0		386.624	275.002	207.298				0		454.859	348.635	197.272		504.592	397.078	199.67				0				0		517.056	404.82	208.438		573.663	377.035	365.165		348.074	247.124	187.479				0
	497.166	387.184	204.252				0		368.133	261.002	198.957				0		441.969	349.796	171.179		481.475	389.013	171.715				0				0		506.679	395.477	206.518		566.123	382.545	340.931		326.205	218.465	200.088				0
	445.995	363.238	153.691				0		315.928	232.782	154.415				0				0		462.122	373.84	163.953				0				0		463.925	357.671	197.33		541.159	367.224	323.023		267.892	182.792	158.044				0
	432.22	348.794	154.934				0		266.898	200.724	122.895				0				0		480.652	389.486	169.308				0				0		432.13	334.126	182.008		514.938	358.475	290.575		214.023	167.787	85.8665				0
	437.469	343.089	175.278				0		219.791	176.784	79.8698				0				0		460.08	376.148	155.874				0				0		388.636	296.849	170.461		486.05	341.787	267.917		162.167	129.917	59.8945				0
	402.654	338.215	119.674				0				0				0				0		452.478	378.477	137.432				0				0		339.274	284.198	102.284		460.954	326.065	250.507		170.152	134.371	66.4506				0
	408.056	330.964	143.171				0				0				0				0		449.663	366.555	154.343				0				0		311.851	272.884	72.3671		447.298	307.456	259.706				0				0
	373.34	306.434	124.255				0				0				0				0		374.882	330.253	82.8821				0				0		287.008	248.853	70.8598		424.205	299.511	231.575				0				0
	352.138	303.531	90.2714				0				0				0				0				0				0				0				0		381.788	278.331	192.134
	371.608	303.793	125.943				0				0				0				0				0				0				0				0		421.19	290.44	242.82
	340.851	274.965	122.359				0				0				0				0				0				0				0				0		370.392	278.354	170.927
	325.511	269.495	104.03				0				0				0				0				0				0				0				0		356.954	252.903	193.236
	286.976	246.06	75.9876				0				0				0				0				0				0				0				0		311.49	229.548	152.177
	315.233	264.81	93.6433				0				0				0				0				0				0				0				0		307.409	223.945	155.005
	292.825	254.493	71.188				0				0				0				0				0				0				0				0		240.597	167.721	135.341
	256.536	221.625	64.8342				0				0				0				0				0				0				0				0		216.436	158.104	108.331
	268.851	217.135	96.0444				0				0				0				0				0				0				0				0		178.397	136.67	77.4937
	258.98	209.398	92.0805				0				0				0				0				0				0				0				0		165.803	130.72	65.1547
	230.671	192.375	71.1211				0				0				0				0				0				0				0				0		146.931	119.84	50.3119
	216.994	176.843	74.5661				0				0				0				0				0				0				0				0		128.268	105.2	42.8411
	171.99	151.221	38.571				0				0				0				0				0				0				0				0		139.247	122.022	31.9895
	-bkg roll ball 50, select slide, NO PROJ, measure on structure line scan 6pixel and bkg 13 pix				-bkg roll ball 50, select slide, NO PROJ, measure on structure line scan 6pixel and bkg 13 pix				-bkg roll ball 50, select slide, NO PROJ, measure on structure line scan 6pixel and bkg 13 pix				-bkg roll ball 50, select slide, NO PROJ, measure on structure line scan 6pixel and bkg 13 pix				-bkg roll ball 50, select slide, NO PROJ, measure on structure line scan 6pixel and bkg 13 pix				-bkg roll ball 50, select slide, NO PROJ, measure on structure line scan 6pixel and bkg 13 pix				-bkg roll ball 50, select slide, NO PROJ, measure on structure line scan 6pixel and bkg 13 pix				-bkg roll ball 50, select slide, NO PROJ, measure on structure line scan 6pixel and bkg 13 pix				-bkg roll ball 50, select slide, NO PROJ, measure on structure line scan 6pixel and bkg 13 pix				-bkg roll ball 50, select slide, NO PROJ, measure on structure line scan 6pixel and bkg 13 pix				-bkg roll ball 50, select slide, NO PROJ, measure on structure line scan 6pixel and bkg 13 pix				-bkg roll ball 50, select slide, NO PROJ, measure on structure line scan 6pixel and bkg 13 pix				-bkg roll ball 50, select slide, NO PROJ, measure on structure line scan 6pixel and bkg 13 pix
	ROI 38				ROI 37 TILTED				ROI 36 TILTED				ROI 35				ROI 34				ROI 33 TILTED				ROI 32				ROI 31				ROI 28 TILTED				ROI 27 TILTED				ROI 26				ROI 25 TILTED				ROI 24
	1 slide				1 slide				1 slide				1 slide				1 slide				1 slide				1 slide				1 slide				1 slide				1 slide				1 slide				1 slide				1 slide
			744.859				752.628				1111.33				743.021				655.132				731.888				475.524				608.499				839.932				926.398				697.379				718.022
			734.924				729.772				1104.67				744.902				655.053				733.929				469.056				608.675				857.033				915.955				694.248				721.431
			732.235				725.602				1091.32				730.758				650.949				712.434				460.277				607.777				802.991				910.418				693.88				699.392
	845.807	565.263	521.011		750.405	504.14	457.348		601.724	462.801	257.999		724.025	501.838	412.632		928.732	777.89	280.135		827.804	595.73	430.994		244.241	206.547	70.0035		599.452	367.169	431.382		820.701	738.01	153.57		731.274	562.143	314.101		589.402	488.36	187.651		682.063	528.728	284.765		918.346
	1035.56	692.173	637.711		982.931	637.764	641.025		737.027	554.629	338.739		854.837	611.842	451.278		991.877	829.086	302.327		1017.31	705.355	579.354		311.167	242.715	127.126		767.32	476.327	540.416		1034.91	844.988	352.707		900.131	685.012	399.506		721.89	550.452	318.386		700.614	528.446	319.741		1046.62
	1185.14	789.417	734.924		1151.4	719.281	802.509		1036.93	702.063	621.897		1103.59	765.989	626.975		1144.52	912.099	431.635		1210.68	827.06	712.434		441.952	325.18	216.861		862.57	534.822	608.675		1284.35	987.448	551.394		1161.2	826.539	621.517		890.711	645.652	455.11		846.823	582.386	491.097		1157.59
	1242.67	829.449	767.417		1139.91	749.524	725.003		1392.5	906.059	903.399		1271.33	870.231	744.902		1285.35	967.759	589.816		1277.89	874.419	749.302		577.873	425.167	283.596		899.164	571.216	609.046		1527.62	1095.24	802.991		1372.18	961.22	763.21		1044.81	752.178	543.456		987.045	635.222	653.384		1207.67
	1202.52	808.238	732.235		1108.58	717.874	725.602		1636.15	1048.52	1091.32		1281.2	875.524	753.404		1349.97	999.455	650.949		1277.94	882.746	733.929		690.806	484.68	382.805		902.892	575.628	607.777		1587.24	1125.76	857.033		1520.83	1050.86	872.794		1187.12	840.534	643.657		1033.28	656.686	699.392		1115.67
	1124.64	751.951	692.136		1074.59	681.631	729.772		1754.6	1141.84	1138		1236.37	844.692	727.398		1351.42	996.363	659.396		1263.83	887.294	699.276		741.354	499.459	449.233		803.182	530.249	506.875		1549.75	1086.8	859.772		1597.12	1084.06	952.821		1248.53	869.445	704.009		1051.43	656.606	733.244		1034.03
	1066.7	720.547	642.857		1016.06	666.692	648.826		1718.83	1124.01	1104.67		1203.05	832.784	687.641		1342.52	989.8	655.053		1192.56	841.962	651.106		791.277	523.533	497.239		800.422	528.833	504.379		1468.36	1050.06	776.841		1523.57	1030.36	915.955		1260	886.373	693.88		1023.61	635.147	721.431		1025.59
	1005.37	700.195	566.749		965.496	622.589	636.827		1620.79	1059.46	1042.47		1182.46	810.99	689.883		1264.44	945.51	592.291		1100.36	776.421	601.608		730.871	483.029	460.277		796.373	531.438	492.023		1392.41	986.406	754.013		1475.1	984.88	910.418		1260.08	886.257	694.248		971.308	615.27	661.213		1010.85
	986.433	705.582	521.581		964.022	611.783	654.159		1588.41	1032.91	1031.65		1217	829.415	719.795		1210.24	922.285	534.771		1065.87	760.134	567.801		647.959	425.534	413.076		756.104	504.109	467.99		1297.74	950.16	645.502		1439.39	952.786	903.698		1215.85	862.785	655.694		932.957	591.783	633.608		967.617
	971.264	673.631	552.748		911.158	587.515	601.051		1417.71	929.748	906.206		1184.53	791.048	730.758		1183.94	883.05	558.795		920.436	689.959	428.029		671.029	418.461	469.056		722.925	496.901	419.758		1246.69	879.683	681.576		1348.33	906.841	819.911		1166.86	860.218	569.471		902.299	576.65	604.778		926.623
	957.02	677.803	518.547		860.195	554.023	568.605		1362.83	888.989	879.994		1130.15	758.622	689.984		1140.65	838.621	560.919		867.997	669.897	367.899		643.507	412.484	429.042		682.99	475.477	385.383		1190.29	852.556	627.229		1252.55	839.484	767.126		1219.8	861.341	665.718		833.822	540.223	545.254		860.038
	901.412	652.157	462.901		770.357	506.469	490.079		1267.25	815.228	839.474		1097.05	737.219	668.251		1076.74	809.351	496.58		767.05	602.085	306.363		609.981	402.218	385.846		655.237	458.529	365.315		1085.44	799.177	531.64		1194.82	805.841	722.382		1181.5	847.968	619.421		754.17	492.958	485.109		859.213
	870.346	622.326	460.609		791.161	517.128	508.918		1177.93	764.763	767.319		1050.62	725.438	603.905		1051.61	768.908	525.019		615.252	523.028	171.273		611.419	398.751	394.955		647.84	452.285	363.174		1021.32	752.771	498.737		1073.79	729.462	639.472		1152.71	831.354	596.81		747.733	490.189	478.296		827.867
	817.218	599.79	403.794		736.196	475.188	484.73		1126.42	733.952	728.861		1027.34	706.751	595.377		990.985	726.139	491.855						568.405	375.694	357.892		589.378	423.801	307.501		988.781	725.294	489.332		1036.41	702.295	620.494		1174.24	839.717	621.254		633.427	448.639	343.178		828.295
	813.63	604.718	387.98		666.223	449.604	402.292		1040.33	687.721	654.837		1001.83	686.019	586.501		958.496	697.635	484.456						544.597	360.467	341.956		526.303	381.634	268.672		998.662	723.899	510.274		1030.22	693.252	625.8		1174.69	850.867	601.394		591.046	422.498	313.017		760.731
	814.84	598.781	401.251		628.771	432.698	364.135		945.797	648.015	553.024		965.76	643.703	598.105		977.841	696.934	521.684						526.874	341.072	345.062		522.951	374.649	275.418		889.458	662.244	421.97		971.279	669.206	560.993		1165.34	837.578	608.701		559.629	411.369	275.339		713.106
	755.608	571.686	341.57		542.519	383.435	295.442		822.197	562.337	482.598		930.738	632.166	554.491		960.924	679.834	522.024						496.514	322.5	323.169		487.15	362.703	231.116		851.422	643.927	385.348		848.696	607.287	448.331		1204.37	860.263	639.051		504.897	388.174	216.772		682.39
	718.167	537.596	335.345		517.843	381.498	253.214				0		883.275	601.959	522.444		961.574	667.191	546.711						490.014	327.616	301.596		479.745	363.199	216.442		805.315	615.842	351.878		818.276	587.068	429.386		1142.49	817.747	603.094		461.327	358.006	191.881		642.91
	751.572	562.232	351.631		459.114	346.104	209.876				0		837.8	574.717	488.582		849.952	626.855	414.322						511.727	343.045	313.266		475.791	352.331	229.282		755.029	574.792	334.725		749.92	544.858	380.828		1060.89	789.885	503.296		444.686	347.394	180.684		609.038
	727.613	535.772	356.276		443.919	339.726	193.501				0		819.938	558.381	485.748		848.363	597.263	466.329						504.062	338.974	306.593		472.534	345.96	235.066		694.81	520.413	323.881		683.928	494.245	352.269		1036.85	756.329	520.97		421.686	339.165	153.253		566.969
	723.469	524.091	370.273				0				0		770.451	536.827	433.873		832.467	597.285	436.767						478.298	327.664	279.749		425.309	325.804	184.794		673.716	508.796	306.28		643.966	479.496	305.444		1040.64	763.645	514.428		399.505	332.09	125.2		556.653
	685.029	499.596	344.374				0				0		712.418	503.454	388.077		815.732	584.043	430.279						421.601	308.182	210.636		418.711	312.237	197.737		614.614	471.552	265.687		603.11	470.781	245.753		981.67	736.937	454.504		362.224	308.517	99.7414		525.984
	681.33	504.891	327.673				0				0		686.019	468.34	404.262		829.882	595.402	435.463						387.04	284.287	190.828		375.065	279.957	176.629		568.212	442.756	232.991		549.394	438.416	206.101		997.53	743.33	472.086		342.168	266.443	140.631		536.559
	672.419	493.757	331.8				0				0		630.933	452.414	331.535		833.767	594.588	444.189						384.822	278.698	197.089		342.567	273.466	128.332		547.322	431.349	215.378		537.574	412.425	232.418		973.828	733.269	446.752				0		528.244
	683.2	475.848	385.082				0				0		622.019	431.735	353.386		796.636	543.653	469.826						308.681	224.722	155.923		322.482	260.506	115.099		509.002	419.899	165.477		460.315	374.49	159.389		997.395	713.408	527.403				0		521.722
	667.016	484.024	339.842				0				0		560.325	390.254	315.846		762.975	542.803	408.892						306.569	221.73	157.559		303.186	253.815	91.6892		477.662	396.28	151.139				0		993.861	723.459	502.176				0		523.179
	629.053	451.38	329.964				0				0		556.462	386.054	316.472		761.375	530.222	429.284						259.49	193.93	121.754		298.126	247.955	93.1756		450.827	368.61	152.688				0		928.162	685.33	450.973				0		540.04
	613.737	437.465	327.362				0				0		512.563	350.541	300.898		745.948	522.795	414.426						218.78	171.308	88.1623		286.839	230.348	104.911		399.749	340.95	109.198				0		899.466	655.504	453.071				0		501.254
	600.982	433.275	311.456				0				0		500.789	360.397	260.728		752.098	519.081	432.745						212.273	182.157	55.9301		257.296	214.77	78.9754				0				0		825.723	600.021	419.162				0		477.398
	570.876	412.438	294.242				0				0		483.844	343.551	260.545		679.489	488.311	355.044						189.937	157.372	60.4775		273.692	219.32	100.976				0				0		751.916	563.252	350.375				0		505.061
	551.64	407.141	268.355				0				0		472.583	334.194	257.007		650.85	465.955	343.376										259.497	213.501	85.4206				0				0		728.498	540.051	349.973				0		520.276
	491.894	354.992	254.247				0				0		424.781	298.683	234.182		636.496	452.629	341.467										248.667	210.101	71.6218				0				0		673.404	502.753	316.925				0		530.828
	415.759	305.435	204.887				0				0		417.438	281.945	251.629		607.402	440.616	309.746										221.015	189.155	59.1688				0				0		600.366	456.454	267.265				0		493.993
	391.902	301.663	167.585				0				0		393.834	277.317	216.387		555.105	407.476	274.168										227.238	187.107	74.5294				0				0		583.997	457.992	234.01				0		486.421
	338.184	255.658	153.263				0				0		380.154	267.125	209.911		477.926	360.503	218.071										195.653	175.998	36.5018				0				0		528.572	408.354	223.263				0		499.142
	278.412	229.082	91.6129				0				0		319.334	226.239	172.892		427.909	332.859	176.522										201.009	175.794	46.8288				0				0		485.877	369.442	216.235				0		494.349
	237.477	201.493	66.8287				0				0		280.276	207.28	135.563		384.975	288.764	178.676										188.199	161.149	50.234				0				0		437.746	347.765	167.108				0		458.753
	184.679	162.962	40.3318				0				0		223.926	174.351	92.0673		346.093	284.772	113.882										194.024	153.353	75.533				0				0		408.497	334.593	137.25				0		474.577
			0				0				0		238.59	178.21	112.135		332.23	263.41	127.809										142.513	124.46	33.5257				0				0		371.282	322.558	90.4869				0		460.265
			0				0				0				0		337.964	283.592	100.976																														439.847
			0				0				0				0		298.067	250.478	88.3792																														417.884
			0				0				0				0		298.259	252.42	85.1305																														371.289
			0				0				0				0		290.514	241.31	91.3785																														395.12
			0				0				0				0		271.444	232.283	72.7283																														345.217
			0				0				0				0		269.304	222.211	87.4575																														299.709
			0				0				0				0		282.877	219.762	117.212																														282.744
			0				0				0				0		256.662	211.417	84.0262																														267.477
			0				0				0				0		244.99	220.874	44.788																														213.771
			0				0				0				0		243.516	217.048	49.1565																														223.021
																	229.982	202.488	51.0595																														160.92
																	244.652	206.406	71.0283
																	237.847	194.317	80.8422
																	233.625	200.96	60.663
																	208.875	181.993	49.9246
																	225.842	181.061	83.1645
																	253.962	198.199	103.559
																	244.191	205.321	72.1871
																	235.213	193.12	78.1738
																	217.112	173.55	80.901
																	188.684	168.221	38.0036
																	174.416	155.668	34.8179
	-bkg roll ball 50, select slide, NO PROJ, measure on structure line scan 6pixel and bkg 13 pix				-bkg roll ball 50, select slide, NO PROJ, measure on structure line scan 6pixel and bkg 13 pix				-bkg roll ball 50, select slide, NO PROJ, measure on structure line scan 6pixel and bkg 13 pix				-bkg roll ball 50, select slide, NO PROJ, measure on structure line scan 6pixel and bkg 13 pix				-bkg roll ball 50, select slide, NO PROJ, measure on structure line scan 6pixel and bkg 13 pix				-bkg roll ball 50, select slide, NO PROJ, measure on structure line scan 6pixel and bkg 13 pix				-bkg roll ball 50, select slide, NO PROJ, measure on structure line scan 6pixel and bkg 13 pix				-bkg roll ball 50, select slide, NO PROJ, measure on structure line scan 6pixel and bkg 13 pix				-bkg roll ball 50, select slide, NO PROJ, measure on structure line scan 6pixel and bkg 13 pix				-bkg roll ball 50, select slide, NO PROJ, measure on structure line scan 6pixel and bkg 13 pix				-bkg roll ball 50, select slide, NO PROJ, measure on structure line scan 6pixel and bkg 13 pix				-bkg roll ball 50, select slide, NO PROJ, measure on structure line scan 6pixel and bkg 13 pix				-bkg roll ball 50, select slide, NO PROJ, measure on structure line scan 6pixel and bkg 13 pix
	ROI 21				ROI 20				ROI 18				ROI 17				ROI 14 TILTED				ROI 13				ROI 11				ROI 10 TILTED				ROI 9 TILTED				ROI 8				ROI 7				ROI 7				ROI 3 TILTED
	1 slide				1 slide				1 slide				1 slide				1 slide				1 slide				1 slide				1 slide				1 slide				1 slide				1 slide				1 slide				1 slide
			655.13				690.781				724.504				741.962				1249.21				904.262				692.826				688.25				759.026				499.08				855.281				744.915
			650.719				682.694				716.066				736.296				1244.82				906.16				694.55				689.116				739.527				498.771				854.965				747.418
			645.015				657.743				700.045				685.023				1239.72				873.556				681.453				655.359				733.607				485.616				844.989				718.959
	692.144	505.977	345.738		405.003	300.616	193.862		836.723	607.476	425.745		744.666	558.663	345.435		906.936	626.607	520.61		717.383	507.8	389.226		574.427	447.954	234.877		585.255	479.913	195.635		470.63	352.349	219.665		362.344	374.139	-21.905		676.159	492.013	341.986		582.544	403.662	332.208		654.978
	890.57	620.756	501.082		508.438	361.156	273.525		997.028	698.968	553.539		883.174	666.836	401.771		1072.94	733.153	631.028		950.947	647.864	562.87		637.679	466.244	318.379		637.286	509.544	237.236		666.727	469.894	365.546		486.692	420.16	123.56		785.499	555.716	426.74		744.08	504.162	445.561		814.114
	1090.18	739.797	650.719		737.926	505.446	431.749		1123.6	797.057	606.444		1167.16	850.838	587.451		1375.69	895.418	891.933		1222.81	833.359	723.273		792.057	563.187	425.043		761.664	568.785	358.203		907.265	598.474	573.469		677.21	504.84	320.115		959.316	646.095	581.695		902.059	588.153	582.967		988.881
	1092.23	744.915	645.015		1013.97	680.567	619.177		1220.19	856.892	674.687		1347.81	978.951	685.023		1680.5	1037.51	1194.12		1415.32	953.453	857.758		978.381	680.471	553.262		945.89	633.95	579.316		1139.75	772.641	681.77		859.65	618.918	447.074		1221.03	798.24	785.184		1050.78	663.647	718.959		1033.28
	1079.47	736.954	636.103		1152.27	758.17	731.906		1257.9	880.948	700.045		1476.7	1043.47	804.567		1801.42	1121.29	1263.1		1435.33	964.952	873.556		1124.33	759.45	677.64		1001.03	656.374	640.07		1273.06	840.172	803.943		945.578	669.426	512.854		1297	830.751	865.89		1125.49	723.039	747.418		1033.94
	1055.63	717.043	628.799		1164.26	796.651	682.694		1287.24	879.413	757.403		1441.79	1045.32	736.296		1775.44	1107.9	1239.72		1432.96	930.535	933.071		1150.22	771.968	702.475		1057.34	669.505	720.274		1239.37	841.167	739.527		969.085	700.515	498.771		1295.92	835.555	854.965		1116.75	703.011	768.369		1041.97
	1077.29	716.701	669.657		1120.28	766.113	657.743		1242.91	857.334	716.066		1366.37	1012.13	657.873		1752.75	1082.46	1244.82		1379.42	891.485	906.16		1131.98	765.04	681.453		1068.18	697.119	689.116		1213.56	832.42	707.84		913.846	656.024	478.812		1240.8	785.807	844.989		1041.9	669.271	692.029		993.165
	1042.7	696.775	642.433		1023.4	727.222	550.035		1201.49	844.809	662.416		1251.26	916.236	622.194		1656.07	1026.97	1168.33		1321.97	870.206	838.988		1088.25	722.978	678.361		1018.5	665.61	655.359		1221.53	826.508	733.607		874.034	612.548	485.616		1123.76	734.713	722.509		1008.21	656.537	653.111		959.834
	1040.92	696.833	639.013		936.98	685.541	466.959		1142.19	795.709	643.457		1175.36	874.019	559.643		1620.27	999.491	1152.88		1274.22	828.43	827.903		1078.04	704.051	694.55		976.994	649.935	607.395		1209.41	817.858	727.161		815.745	579.001	439.668		1117.26	745.204	690.963		1016.81	663.832	655.527		965.725
	1001.14	685.13	586.884		893.43	651.72	448.89		1139.4	777.307	672.463		1074.1	808.596	493.071		1508.22	927.275	1078.9		1264.01	838.334	790.535		1002.43	659.369	637.121		905.125	612.611	543.241		1187.64	822.015	679.018		773.812	538.146	437.665		1045.75	722.421	600.476		964.442	631.076	619.108		945.108
	976.506	665.749	577.119		912.757	635.107	515.636		1034.13	722.622	578.507		1065.56	793.01	506.164		1448.74	899.898	1019.27		1221.05	817.254	749.907		998.374	668.695	612.262		893.991	616.447	515.439		1107.21	777.726	611.905		728.268	496.516	430.396		1034.35	717.348	588.722		960.398	616.332	638.98		923.24
	911.345	627.504	527.133		895.18	616.696	517.186		1071.56	737.668	620.078		1056.31	753.656	562.081		1392.44	871.187	968.051		1169.71	802.706	681.586		1002.46	659.337	637.232		855.153	595.638	481.957		1069.32	758.369	577.488		700.404	484.615	400.752		1028.13	705.417	599.326		964.372	631.749	617.729		908.718
	897.259	619.147	516.494		856.508	580.96	511.733		1023.84	687.891	623.905		1077.19	745.316	616.342		1322.16	849.298	878.175		1081.69	763.169	591.533		973.852	646.192	608.51		828.751	565.418	489.047		1035.54	717.063	591.456		706.584	475.564	429.037		1023.42	688.856	621.328		961.796	635.214	606.51		892.599
	861.304	602.002	481.562		834.43	560.935	507.919		999.782	681.478	591.135		1109.31	767.806	634.213		1189.19	798.438	725.686		1070.1	741.016	611.163		900.207	641.696	480.092		832.128	586.965	455.303		939.932	650.101	538.257		630.43	431.765	368.95		989.006	682.904	568.476		946.726	619.127	608.399		854.379
	832.389	575.543	477		826.72	540.715	531.153		984.553	670.421	583.388		1094.79	758.888	623.817		1130.55	739.824	725.639		1064.38	737.772	606.553		899.978	626.475	507.933		789.594	565.108	416.903		906.802	630.666	512.823		653.839	430.265	415.208		943.97	656.995	532.953		949.737	618.65	614.875		802.285
	792.97	558.02	436.335		814.159	545.278	499.351		945.532	645.346	557.489		1102.54	743.308	667.145		1063.4	717.672	642.072		1099.91	739.765	668.836		872.35	604.033	498.302		773.633	556.218	403.77		855.74	604.26	467.035		636.329	408.454	423.196		887.461	609.704	515.835		924.303	600.631	601.105		793.954
	803.197	563.169	445.766		820.839	543.93	514.259		890.933	597.845	544.305		1082.93	732.843	650.16		990.745	691.918	554.963		1067.05	723.275	638.436		752.916	538.197	398.764		729.446	546.122	340.459		873.944	614.067	482.628		630.385	415.913	398.306		874.243	621.077	470.166		910.768	591.135	593.603
	758.058	540.728	403.613		819.383	548.291	503.456		820.205	560.295	482.69		1102.97	747.146	660.809		926.239	659.165	495.995		997.102	681.391	586.321		736.544	538.19	368.371		678.492	506.405	319.59		821.578	581.075	446.648		602.03	397.578	379.697		792.652	565.935	421.044		893.643	594.911	554.787
	683.26	497.011	345.891		785.614	525.375	483.301		798.834	529.832	499.575		1070.53	713.904	662.311		869.228	621.73	459.639		984.851	669.635	585.4		706.307	502.191	379.071		644.077	487.084	291.558		815.023	580.689	435.192		552.766	371.878	335.934		741.457	537.906	378.022		834.581	566.081	498.643
	640.2	480.28	296.995		778.03	499.723	516.856		791.892	526.151	493.518		1019.03	687.602	615.517		844.813	608.806	438.3		947.865	665.357	524.657		669.824	485.093	343.071		623.626	486.616	254.448		780.975	560.433	409.577		509.423	350.308	295.5		724.82	512.172	394.919		820.836	557.076	489.84
	625.619	460.849	306.002		728.358	475.79	469.054		722.179	501.392	410.033		909.71	650.15	482.041		778.554	586.014	357.573		924.559	641.712	525.287		675.784	498.868	328.56		567.214	440.474	235.376		738.159	517.571	409.664		510.71	358.816	282.089		677.137	483.944	358.787		796.731	537.844	480.79
	596.975	423.73	321.741		686.473	456.698	426.726		717.898	483.348	435.593		926.428	637.404	536.759		696.637	544.006	283.457		926.599	617.911	573.278		650.186	480.287	315.527		534.583	441.893	172.138		728.716	529.679	369.641		459.923	313.26	272.375		655.299	469.066	345.861		783.262	509.014	509.316
	601.01	450.319	279.854		684.784	454.831	427.056		699.418	477.548	412.045		941.379	628.649	580.783		651.876	514.151	255.774		922.433	623.552	555.066		626.476	451.372	325.193		513.618	421.011	171.983		700.166	493.205	384.357		460.278	315.868	268.19		638.427	466.81	318.718		715.408	489.882	418.835
	534.626	408.895	233.5		705.7	455.308	465.015		663.082	462.538	372.439		899.768	600.197	556.346		612.671	494.112	220.18		890.556	611.162	518.874		606.529	444.103	301.649		460.962	387.474	136.478		682.151	488.996	358.717		419.341	288.423	243.133		625.58	462.745	302.406		679.21	476.907	375.706
	518.19	400.223	219.082		715.977	462.207	471.286		651.779	452.302	370.458		857.406	597.966	481.818				0		871.6	586.365	529.722		579.359	424.953	286.754		416.471	362.125	100.928		670.982	473.699	366.382		409.077	283.635	232.964		582.662	432.93	278.072		652.141	465.711	346.227
	487.922	371.966	215.346		717.214	461.099	475.642		653.313	454.844	368.586		841.172	593.591	459.795				0		864.506	583.976	520.985		545.148	408.842	253.138				0		618.064	446.349	318.9		376.952	267.399	203.455		571.273	426.659	268.569		621.238	434.601	346.611
	443.313	335.451	200.315		705.535	440.529	492.153		579.66	419.013	298.344		767.477	543.732	415.527				0		812.005	563.825	460.905		556.577	413.149	266.366				0		563.569	416.405	273.306		332.257	245.282	161.525		551.257	408.914	264.351		602.575	429.264	321.863
	377.633	311.111	123.541		703.483	449.964	470.821		540.739	383.351	292.292		774.439	549.113	418.464				0		830.921	561.615	500.14		536.759	399.966	254.043				0		523.657	403.36	223.408		323.561	232.708	168.728		534.696	383.072	281.587		561.833	421.527	260.569
	395.101	319.52	140.366		735.757	468.707	495.951		491.974	367.292	231.552		774.149	560.622	396.551				0		773.829	537.886	438.179		543.249	398.798	268.265				0		470.587	383.231	162.233		306.171	224.036	152.537		493.263	353.299	259.934		562.163	419.827	264.339
	397.938	315.176	153.7		728.336	474.11	472.134		471.785	359.006	209.448		757.571	538.639	406.589				0		706.075	498.801	384.938		506.79	382.523	230.782				0		444.068	354.563	166.225		268.51	206.75	114.697		441.42	329.372	208.09		533.177	390.631	264.729
	340.12	283.569	105.025		716.069	473.758	450.006		427.399	326.537	187.314		703.973	522.535	336.956				0		719.261	508.904	390.663		474.326	361.196	210.099				0		388.851	313.429	140.069				0		378.974	306.07	135.392		453.733	352.784	187.476
			0		699.104	448.708	465.02		397.879	297.44	186.53		659.694	506.018	285.398				0		708.361	506.678	374.555		480.634	358.28	227.229				0		339.503	288.412	94.8835				0		336.336	270.237	122.754		436.076	331.322	194.543
			0		669.599	447.2	413.026				0		616.839	484.694	245.412				0		665.609	479.483	345.662		485.033	359.396	233.324				0		307.925	266.135	77.6091				0		308.671	251.395	106.369		418.971	331.802	161.886
			0		696.874	459.533	440.777				0		529.436	428.571	187.321				0		637.981	481.366	290.855		477.867	360.446	218.067				0				0				0		285.817	242.791	79.9039		374.499	317.279	106.266
			0		679.99	459.188	410.062				0		465.071	369.121	178.194				0		593.932	438.194	289.229		422.365	324.8	181.192				0				0				0		273.001	231.56	76.9622		392.45	320.46	133.695
			0		700.606	461.202	444.607				0				0				0		568.447	413.106	288.491		392.597	304.539	163.537				0				0				0		245.492	221.287	44.9518		383.429	307.834	140.392
			0		642.807	439.861	376.899				0				0				0		539.414	411.642	237.29		337.021	279.571	106.693				0				0				0		229.585	199.716	55.4716		333.429	289.27	82.0096
			0		630.722	418.864	393.451				0				0				0		515.807	393.728	226.718		319.921	262.553	106.541				0				0				0				0				0
			0		583.988	394.209	352.447				0				0				0		482.984	387.798	176.773		333.95	262.046	133.535				0				0				0				0				0
			0				0				0				0				0		459.455	362.263	180.499		275.018	228.35	86.6684				0				0				0				0				0
			0				0				0				0				0		456.2	364.449	170.396		274.322	230.396	81.5759				0				0				0				0				0
			0				0				0				0				0		426.554	348.196	145.522		275.864	207.17	127.575				0				0				0				0				0
			0				0				0				0				0		403.202	330.971	134.144		259.634	210.48	91.2858				0				0				0				0				0
			0				0				0				0				0		392.717	322.276	130.818		223.662	190.987	60.6821				0				0				0				0				0
			0				0				0				0				0		368.978	310.07	109.4		212.508	183.779	53.3529				0				0				0				0				0
			0				0				0				0				0				0				0				0				0				0				0				0
			0				0				0				0				0				0				0				0				0				0				0				0
			0				0				0				0				0				0				0				0				0				0				0				0
			0				0				0				0				0				0				0				0				0				0				0				0
			0				0				0				0				0				0				0				0				0				0				0				0
													MANIP II
	-bkg roll ball 50, select slide, NO PROJ, measure on structure line scan 6pixel and bkg 13 pix				-bkg roll ball 50, select slide, NO PROJ, measure on structure line scan 6pixel and bkg 13 pix				-bkg roll ball 50, select slide, NO PROJ, measure on structure line scan 6pixel and bkg 13 pix				-bkg roll ball 50, select slide, NO PROJ, measure on structure line scan 6pixel and bkg 13 pix				-bkg roll ball 50, select slide, NO PROJ, measure on structure line scan 6pixel and bkg 13 pix				-bkg roll ball 50, select slide, NO PROJ, measure on structure line scan 6pixel and bkg 13 pix				-bkg roll ball 50, select slide, NO PROJ, measure on structure line scan 6pixel and bkg 13 pix				-bkg roll ball 50, select slide, NO PROJ, measure on structure line scan 6pixel and bkg 13 pix				-bkg roll ball 50, select slide, NO PROJ, measure on structure line scan 6pixel and bkg 13 pix				-bkg roll ball 50, select slide, NO PROJ, measure on structure line scan 6pixel and bkg 13 pix				-bkg roll ball 50, select slide, NO PROJ, measure on structure line scan 6pixel and bkg 13 pix				-bkg roll ball 50, select slide, NO PROJ, measure on structure line scan 6pixel and bkg 13 pix				-bkg roll ball 50, select slide, NO PROJ, measure on structure line scan 6pixel and bkg 13 pix
	ROI 25 TILTED				ROI 24				ROI 23 TILTED				ROI 21				ROI 20 TILTED				ROI 19 TILTED				ROI 18 TILTED				ROI 17				ROI 16				ROI 15 TILTED				ROI 14 TILTED				ROI 12 TILTED				ROI 11 TILTED
	1 slide				1 slide				1 slide				1 slide				1 slide				1 slide				1 slide				1 slide				1 slide				1 slide				1 slide				1 slide				1 slide
			1487.13				735.468				486.611				763.461				799.677				651.929				614.779				554.221				654.056				734.228				643.478				839.234
			1490.83				742.395				500.218				754.85				787.063				631.095				612.661				538.761				649.996				728.942				622.551				835.072
			1440.19				716.951				443.752				740.853				756.087				598.333				605.527				520.125				647.811				715.827				616.501				814.552
	1037.04	753.126	527.26		670.934	488.699	338.435		579.19	454.906	230.813		505.741	385.624	223.074		621.833	481.731	260.19		480.333	431.769	90.1905		580.279	459.109	225.031		277.69	210.664	124.476		642.491	464.032	331.424		572.072	396.359	326.325		561.015	425.404	251.85		524.96	419.334	196.162		582.048
	1332.66	926.63	754.053		778.584	542.3	438.813		668.856	492.88	326.813		582.935	441.997	261.741		767.52	592.418	325.19		613.333	541.192	133.976		702.676	543.593	295.44		348.382	256.563	170.522		816.09	572.526	452.334		692.846	481.991	391.587		629.987	469.366	298.295		672.106	496.432	326.253		656.439
	1709.09	1122.71	1088.99		961.898	653.989	571.83		804.642	566.715	441.864		697.123	522.273	324.721		1062.38	765.978	550.469		745.667	587.577	293.595		802.286	620.225	338.113		440.157	308.599	244.322		965.765	665.694	557.275		842.196	572.568	500.738		751.574	568.865	339.317		767.024	582.619	342.466		745.61
	1998.56	1297.97	1301.09		1122.85	736.795	716.951		879.716	610.368	500.218		874.532	618.308	475.846		1263.25	874.954	721.123		926	707.115	406.5		902.032	675.876	420.005		610.874	398.146	395.066		1095.75	746.928	647.811		1012.07	685.746	606.035		935.3	656.539	517.698		998.405	739.881	480.117		932.257
	2152.8	1392.53	1411.93		1221.22	818.953	747.059		869.33	591.557	515.864		1078.38	728.872	649.078		1393.6	932.745	855.882		1109.33	787.154	598.333		1015.25	751.887	489.1		767.88	507.539	483.489		1104.36	754.364	649.996		1164.68	772.176	728.942		1110.94	775.717	622.551		1201.39	860.585	632.919		1215.38
	2276.86	1474.11	1490.83		1185.04	785.293	742.395		768.306	536.892	429.768		1234.02	827.566	754.85		1342.32	918.518	787.063		1195.67	855.846	631.095		1041.67	734.371	570.692		847.525	557.423	538.761		1085.49	727.759	664.36		1211.71	803.602	757.916		1186.31	814.024	691.38		1390.42	951.815	814.552		1466.83
	2360.16	1536.11	1530.38		1069.8	698.272	689.989		757.619	518.675	443.752		1267.87	839.965	794.679		1281.88	874.752	756.087		1235.5	844.385	726.357		1029.81	717.696	579.635		917.377	592.267	603.776		1031.76	689.909	634.867		1172.5	787.054	715.827		1118.31	786.351	616.501		1444.28	976.857	868.079		1680.78
	2298.36	1522.87	1440.19		963.114	636.226	607.079		704.322	483.721	409.688		1211.5	812.576	740.853		1193.33	833.97	667.388		1007.33	749.423	478.976		1011.91	674.75	626.15		834.702	555.775	518.009		1009.11	684.03	603.724		1143.66	782.93	669.935		1080.57	761.116	593.274		1394.59	944.94	835.072		1728.12
	2189.26	1487.27	1303.7		926.503	603.01	600.772		653.182	483.835	314.502		1102.16	736.081	679.853		1172.95	806.978	679.663		905.167	678.154	421.595		964.214	642.354	597.741		811.548	531.481	520.125		1006.09	671.66	621.077		1090.81	750.79	631.464		1058.78	742.13	588.058		1232.89	848.223	714.375		1661.39
	2092.5	1457.28	1179.68		809.497	546.23	488.926		604.024	441.442	301.938		1030.52	689.048	634.157		1132.69	764.652	683.505		834.167	631.769	375.881		971.996	642.102	612.661		786.822	516.244	502.502		964.605	640.532	601.851		1061.25	720.297	633.194		1029.69	710.693	592.419		1168.55	812.594	661.062		1484.03
	1979.28	1428.98	1021.98		779.273	526.538	469.366		584.211	430.679	285.131		1009.5	684.111	604.285		1073.55	743.183	613.534		754.833	570.577	342.19		953.462	627.409	605.527		742.378	468.174	509.235		906.677	619.825	532.726		943.254	670.248	507.01		937.18	643.276	545.822		1007.3	720.077	533.419		1350.75
	1882.17	1368.39	954.165		695.897	477.625	405.362		539.852	395.367	268.329		947.209	640.321	569.936		1009.56	720.282	537.235		776.333	573.731	376.262		917.964	602.938	585.047		683.2	428.655	472.726		848.085	579.589	498.635		926.857	667.295	482.043		914.649	640.488	509.156		902.259	643.993	479.637		1279.48
	1702.25	1284.76	775.34		667.705	460.349	385.09		543.498	410.068	247.799		883.673	620.1	489.495		1013.62	704.208	574.624		729.5	549.577	334.143		856.041	548.012	572.053		630.385	400.15	427.578		815.78	555.207	483.922		912.427	656.008	476.206		899.768	614.978	528.897		771.602	582.48	351.227		1173.23
	1590.96	1221.94	685.322		621.472	437.601	341.475		498.016	389.868	200.846		835.787	606.202	426.372		977.011	699.907	514.622						822.003	534.687	533.586		613.779	382.288	429.911		813.397	554.616	480.593		893.483	633.811	482.247		846.8	570.564	513.009		734.653	559.961	324.427		1079.78
					545.107	392.983	282.517		497.337	371.007	234.613		779.925	578.798	373.521		976.042	686.497	537.725						783.059	523.248	482.507		560.203	364.181	364.04		787.911	527.755	483.148		867.11	628.84	442.501		865.725	564.401	559.6		726.339	528.255	367.871		969.777
					566.891	408.44	294.267		464.764	352.952	207.649		748.676	555.512	358.733		883.324	655.075	423.891						697.541	483.372	397.741		532.741	327.02	382.054		751.285	513.064	442.41		831.168	622.805	386.959		773.967	548.474	418.773		704.33	520.717	340.995		862.358
					510.311	380.411	241.243		394.072	338.818	102.613		727.169	551.82	325.648		881.963	626.151	475.079						648.277	462.581	344.864		509.241	317.302	356.459		720.929	502.848	405.007		817.762	596.532	410.855		738.615	504.573	434.649		640.756	494.536	271.551
					494.534	383.668	205.895		379.134	321.938	106.222		715.592	549.587	308.296		837.896	611.914	419.68						580.68	420.615	297.264		485.425	308.148	329.229		716.304	492.859	414.971		779.58	580.768	369.224		670.869	466.03	380.415		572.195	446.82	232.839
					456.317	351.072	195.456		351.184	301.557	92.1631		665.176	501.715	303.57		791.712	576.738	399.238										467.957	288.679	332.946		693.473	470.536	414.025		757.972	576.613	336.81		638.718	455.125	340.957		525.573	394.164	244.046
					427.241	340.341	161.385						585.161	449.897	251.205		676.701	541.14	251.756										424.335	251.761	320.495		671.313	473.806	366.799		713.886	559.585	286.559		586.049	421.33	305.908		460.558	375.346	158.25
					414.674	331.438	154.581						546.184	414.793	244.012		663.454	518.383	269.416										429.347	251.243	330.764		637.148	454.54	339.129		712.021	574.341	255.692		526.042	398.055	237.689		422.518	339.531	154.119
					350.474	288.776	114.582						518.448	405.794	209.215		627.984	520.503	199.608										350.918	225.895	232.185		591.367	427.922	303.541		728.061	564.62	303.534		481.585	376.939	194.342		378.966	309.182	129.601
					294.601	247.618	87.253						523.097	401.433	225.949		589.531	488.2	188.185										333.632	218.405	213.993		551.462	426.971	231.197		723.453	561.443	300.875		495.516	377.519	219.139
					282.17	226.415	103.545						520.541	404.585	215.346		565.468	454.67	205.768										348.473	217.302	243.604		535.77	404.646	243.515		700.221	549.526	279.862		480.965	349.485	244.176
													500.988	394.158	198.4														318.053	209.213	202.131		487.069	365.048	226.612		687.12	535.657	281.288		426.955	328.064	183.655
													495.017	390.669	193.79														303.928	197.024	198.536		453.915	355.266	183.205		642.633	508.794	248.559		357.501	300.933	105.056
													485.007	384.281	187.061														201.083	123.951	143.245		407.772	325.336	153.096		650.679	503.434	273.455
													477.004	363.792	210.251														144.222	97.9107	86.0069
													426.196	371.729	101.152														107.695	77.3379	56.3777
													397.644	339.122	108.683														69.5084	62.0129	13.9202
													425.747	343.005	153.663
													345.814	289.038	105.442
	-bkg roll ball 50, select slide, NO PROJ, measure on structure line scan 6pixel and bkg 13 pix				-bkg roll ball 50, select slide, NO PROJ, measure on structure line scan 6pixel and bkg 13 pix				-bkg roll ball 50, select slide, NO PROJ, measure on structure line scan 6pixel and bkg 13 pix				-bkg roll ball 50, select slide, NO PROJ, measure on structure line scan 6pixel and bkg 13 pix				-bkg roll ball 50, select slide, NO PROJ, measure on structure line scan 6pixel and bkg 13 pix				-bkg roll ball 50, select slide, NO PROJ, measure on structure line scan 6pixel and bkg 13 pix
	ROI 7 TILTED				ROI 6				ROI 4 TILTED				ROI 3 TILTED				ROI 2 TILTED				ROI 1 TILTED
	1 slide				1 slide				1 slide				1 slide				1 slide				1 slide
			859.023				727.559				541.14				1097.87				1151.08				553.22
			867.671				724.479				552.778				1102.77				1135.6				547.929
			833.779				703.362				504.533				1082.71				1130.23				534.39
	694.781	582.497	208.527		471.223	337.772	247.837		772.676	627.147	270.269		702.35	563.962	257.005		801.631	563.776	441.73		556.332	373.141	340.21
	805.252	649.068	290.054		586.611	397.753	350.736		890.903	710.399	335.222		930.983	698.986	430.852		1068.36	687.069	708.114		578.487	405.099	322.006
	1015.28	761.901	470.557		780.174	501.084	518.31		1068.19	813.73	472.572		1198.22	874.409	601.356		1344.8	844.32	929.464		689.529	459.109	427.922
	1221.2	870.435	651.416		977.163	642.357	621.782		1198.22	893.394	566.111		1445.33	1018.28	793.099		1571	962.414	1130.23		782.401	509.333	507.127
	1358.51	962.135	736.131		1143.92	737.471	754.838		1145.22	847.566	552.778		1692	1133.02	1038.1		1677.88	1038.51	1187.4		821.247	533.499	534.39
	1482.85	1033.89	833.779		1161.47	771.364	724.479		1079.49	807.822	504.533		1687.5	1093.7	1102.77		1637.39	1025.91	1135.6		849.431	538.556	577.34
	1508.96	1037.48	875.618		1084.19	705.456	703.362		962.217	754.881	385.051		1665.94	1069.25	1108.13		1539.72	971.09	1056.02		811.738	516.699	547.929
	1433.31	987.031	828.797		1015.99	651.526	676.857		886.392	686.098	371.975		1569.1	986.108	1082.71		1377.42	879.021	925.606		756.81	487.307	500.505
	1446.66	979.45	867.671		914.424	610.56	564.318		869.017	665.135	378.639		1362.54	877.636	900.533		1202.76	786.169	773.661		677.627	452.293	418.477
	1351.64	933.979	775.654		873.741	581.64	542.473		844.533	645.971	368.758		1182.02	782.635	741.715		1052.88	715.474	626.617		631.373	445.175	345.796
	1333.42	918.947	769.733		843.962	536.832	570.385		816.999	634.839	338.298		987.078	658.694	609.856		921.965	649.451	506.098		609.787	437.37	320.204
	1291.58	875.269	773.148		815.368	523.236	542.53		778.286	584.697	359.522		807.302	557.889	463.195		818.45	597.003	411.259		597.881	427.128	317.112
	1244.5	862.672	709.117		832.081	539.642	543.101		746.518	561.411	343.77		627.959	463.73	304.996		695.736	518.975	328.271		567.376	409.893	292.468
	1124.41	795.004	611.745		793.348	523.134	501.827		706.239	542.464	304.155		485.994	385.383	186.848		572.124	466.512	196.136		520.689	401.568	221.226
	1045.08	745.399	556.552		757.221	489.76	496.713		631.514	509.766	226.105		362.627	315.445	87.6233		514.467	423.805	168.373		505.897	393.091	209.497
	934.666	694.913	445.256		710.462	452.978	478.185		603.816	498.68	195.252						497.345	412.679	157.237		424.267	350.722	136.583
	900.533	688.605	393.581		706.19	460.711	455.889		593.158	481.306	207.725						393.459	345.046	89.9102
	858.19	659.335	369.302		631.146	427.553	378.1		559.942	450.964	202.389
	780.422	618.27	301.139		576.554	393.448	340.053		487.041	396.512	168.127
	700.362	548.685	281.686		566.629	380.238	346.155		491.706	395.27	179.095
	625.943	502.006	230.168		529.245	360.739	312.94		450.637	367.675	154.073
	561.308	470.839	168.013		477.903	328.814	276.879		466.032	379.274	161.122
	485.476	417.926	125.449		464.356	330.157	249.228		413.726	322.752	168.952
	426.222	381.656	82.7662		411.851	301.35	205.215
	413.635	346.772	124.175		407.743	286.959	224.313
	358.712	308.731	92.8224		353.246	259.12	174.805
	340.135	305.865	63.6441		339.336	237.857	188.46
	308.868	278.419	56.5476		330.671	232.503	182.312
					324.462	241.628	153.834
					298.84	224.427	138.197
					264.385	193.266	132.078
					189.175	154.63	64.155
					174.131	154.199	37.0169
					162.977	136.874	48.4772
					117.993	111.605	11.8618
[truncated: 11 more columns]
