# Supplementary material for: A stable microtubule bundle formed through an orchestrated multistep process controls quiescence exit
Source: eLife. 2024 Mar 25;12:RP89958. doi: 10.7554/eLife.89958 (PMC10963028; doi:10.7554/eLife.89958)
Supplement: Figure 1—figure supplement 1—source data 2. [file elife-89958-fig1-figsupp1-data2.xlsx]

## Sheet: ccl
Isy124 manip II													Isy125 manip II														Merge Isy125 manip II
																											n=		60
Tub1		Tub4											Tub1		Tub4												Tub1		Tub4
177.058		12811.2											89.2016		2663.12												177.058		12811.2
168.804		11019.7											66.172		2395.48												168.804		11019.7
199.69		12883.4											104.037		4829.19												199.69		12883.4
211.545		13104.1											171.508		9164.79												211.545		13104.1
158.225		10614.9											136.857		8025.82												158.225		10614.9
79.4935		5273.13											65.0857		3378.29												79.4935		5273.13
167.286		7881.2											106.021		4498.4												167.286		7881.2
142.523		8874.37											50.5366		2185.94												142.523		8874.37
106.192		4004.91											46.7719		539.942												106.192		4004.91
118.249		5037.64											108.198		4811.38												118.249		5037.64
144.782		8358.06											112.228		5214.39												144.782		8358.06
195.585		4751.53											144.193		11154.3												195.585		4751.53
221.84		10906.3											108.329		7159.06												221.84		10906.3
150.26		4283.72											126.153		10110.5												150.26		4283.72
138.314		6191.97											154.246		5393.52												138.314		6191.97
94.3071		1932.44											113.46		6521.36												94.3071		1932.44
194.576		9846.55											48.2261		1959.71												194.576		9846.55
137.276		7864.11											158.71		11035												137.276		7864.11
149.115		7600.8											131.524		12977.9												149.115		7600.8
144.875		9449.87											83.4352		6152.8												144.875		9449.87
110.738		4045.47											86.67		4746.08												110.738		4045.47
157.649		6300.27											99.1239		5400.19												157.649		6300.27
93.4174		3683.76											125.931		7982.74												93.4174		3683.76
140.999		11474.5											70.1095		2869.85												140.999		11474.5
148.954		5321.17											100.456		6016.61												148.954		5321.17
91.5333		2123.17											125.966		9725.34												91.5333		2123.17
57.5146		1650.41											89.3327		3263.38												57.5146		1650.41
94.4777		2211.93											92.8043		4408.6												94.4777		2211.93
123.294		3956.67											106.776		7748.15												123.294		3956.67
123.772		8453.66																									123.772		8453.66
107.062		4648.58																									107.062		4648.58
																											89.2016		2663.12
																											66.172		2395.48
																											104.037		4829.19
																											171.508		9164.79
																											136.857		8025.82
																											65.0857		3378.29
																											106.021		4498.4
																											50.5366		2185.94
																											46.7719		539.942
																											108.198		4811.38
																											112.228		5214.39
																											144.193		11154.3
																											108.329		7159.06
																											126.153		10110.5
																											154.246		5393.52
																											113.46		6521.36
																											48.2261		1959.71
																											158.71		11035
																											131.524		12977.9
																											83.4352		6152.8
																											86.67		4746.08
																											99.1239		5400.19
																											125.931		7982.74
																											70.1095		2869.85
																											100.456		6016.61
																											125.966		9725.34
																											89.3327		3263.38
																											92.8043		4408.6
																											106.776		7748.15
first manip
13293.1									373.335		4331.48
4330.59									365.898		2310.76
6311.76									319.327		2189.22
5174.02									342.116		3466.83
12130.4									418.665		3757.73
8174.18									449.137		3350.5
8390.74									327.817		2744.67
4722.27									252.202		2585.21
7429.57									292.228		1647.22
									293.103		2672.59
									382.659		2680.41
									397.026		3257.94
									298.75		2449.56
									316.744		2286.31
									333.241		2855.92
									391.846		4462.29
									376.232		3082.41
									166.873		718.212
									355.732		2712.52
									290.285		2905.87
									342.847		1684.22
									350.63		3136.06
									421.086		3897.9
									299.246		2969.32
									284.076		2587.91
									344.573		3343
748.375	503.433	587.584	862.178	908.369	835.657	526.041	789.643	760.188	563.147	674.597	783.565	997.369	920.691	609.442	641.382	410.283	794.532	856.577	1006.82	666.862	763.508	580.782	864.575	787.742	694.504	763.28	710.283	818.436	566.292	639.496	719.719	493.339	513.256	494.69	429.329	608.036	592.763	784.336	747.856	567.748	598.822	542.68
2600.59	1250.05	2028.21	2755.22	2753.59	3171.82	3499.17	3061.37	2687.6	1342.11	2260.35	2190.77	3278.65	2171.46	2987.77	2749.01	1140.64	2078.57	2696.28	3172.03	1532.16	1593.62	1989.09	3739.54	4262.81	811.569	2836.99	3173.91	2470.99	2253.59	1809.66	2704.74	1269.3	936.481	1079.52	1692.87	2655.96	2188.41	3469.59	1271.83	1716.87	2621.36	1229.44
	2032.88
	2600.59
	1250.05
	2028.21
	2755.22
	2753.59
	3171.82
	3061.37
	2687.6
	1342.11
	2260.35
	2190.77
	3278.65
	2171.46
	2987.77
	2749.01
	1140.64
	2078.57
	2696.28
	3172.03
	1532.16
	1593.62
	1989.09
	3739.54
	4262.81
	2836.99
	3173.91
	2470.99
	2253.59
	1809.66
	2704.74
	1269.3
	936.481
	1079.52
	1692.87
	2655.96
	2188.41
	3469.59
	1271.83
	1716.87
	2621.36
	1229.44
		780.354	818.689	1108.04	520.598	616.077	614.896	632.146	853.664	960.11	717.278	503.803	664.822	1300.62	856.223	757.326	699.516	868.914	1047.8	583.283	788.599	529.669	696.554	574.671	685.798	513.995	605.58
		2656.68	2081.57	2837.95	985.14	1651.66	1696.93	1924.78	2451.44	1292.02	2626.24	1625.13	1816.44	3021.42	3440.14	2078.87	1527.75	2830.74	2426.56	792.465	2975.26	1717.51	2254.65	1867.56	1479.18	532.789	1983.55
	2656.68
	2081.57
	2837.95
	985.14
	1651.66
	1696.93
	1924.78
	2451.44
	2626.24
	1625.13
	1816.44
	3021.42
	3440.14
	2078.87
	1527.75
	2830.74
	2426.56
	792.465
	2975.26
	1717.51
	2254.65
	1867.56
	1479.18
	532.789
	1983.55

## Sheet: analyse
	Isy124 manip II
			Tub1				Tub1				Tub1				Tub1				Tub1				Tub1				Tub1				Tub1				Tub1				Tub1
	0.416	1203.88	177.058		0.599	1059.78	168.804		0.599	1116.42	199.69		0.416	1327.44	211.545		0.416	1237.92	158.225		0.416	945	79.4935		0.416	1199.68	167.286		0.416	1209.2	142.523		0.416	1048.28	106.192		0.416	1094.28	118.249
	3.744	825.551	Tub4		6.64	803.391	Tub4		6.989	811.617	Tub4		3.029	888.758	Tub4		3.728	900.013	Tub4		3.744	775.142	Tub4		4.243	836.976	Tub4		3.495	907.376	Tub4		3.262	825.566	Tub4		3.495	843.862	Tub4
	0.566	47903.4	12811.2		0.666	36046	11019.7		0.549	47931.9	12883.4		0.499	51098.6	13104.1		0.533	39282.9	10614.9		0.516	27882.7	5273.13		0.433	42878.5	7881.2		0.449	42590.1	8874.37		0.3	35984.4	4004.91		0.416	27612.6	5037.64
	1.564	33460.1			1.764	25746.9			1.281	34522.2			1.398	34211.3			1.331	27342.6			1.132	22321.7			1.298	30749			1.781	27808.2			1.015	26580.4			1.298	19384
			Tub1				Tub1				Tub1				Tub1				Tub1				Tub1				Tub1				Tub1				Tub1				Tub1
	0.416	1176.72	144.782		0.416	1285.52	195.585		0.416	1402.16	221.84		0.416	1190.68	150.26		0.416	1144	138.314		0.416	998.44	94.3071		0.416	1312.56	194.576		0.416	1185.28	137.276		0.416	1255.44	149.115		0.416	1140.36	144.875
	4.26	862.672	Tub4		2.396	896.993	Tub4		2.812	947.781	Tub4		2.596	887.359	Tub4		2.38	869.629	Tub4		4.526	792.577	Tub4		3.994	893.546	Tub4		3.744	891.956	Tub4		2.812	950.018	Tub4		2.596	847.91	Tub4
	0.366	57416.8	8358.06		0.3	36585.5	4751.53		0.333	62682.8	10906.3		0.3	33538.3	4283.72		0.333	46310.1	6191.97		0.333	18287	1932.44		0.433	44861.8	9846.55		0.416	43246.4	7864.11		0.399	41128.3	7600.8		0.366	53808.5	9449.87
	0.732	45998.7			1.281	24456.3			1.265	38552.7			1.132	23043.4			1.198	32884.1			1.315	13953.4			1.182	30452			1.198	30906.7			1.115	28895.6			1.048	37006.2
			Tub1				Tub1				Tub1				Tub1				Tub1				Tub1				Tub1				Tub1				Tub1				Tub1
	0.416	947.64	110.738		0.416	1087.68	157.649		0.416	967.12	93.4174		0.416	1056.04	140.999		0.416	1183.96	148.954		0.416	993.84	91.5333		0.416	868.36	57.5146		0.416	979.2	94.4777		0.416	1110.12	123.294		0.416	1084.6	123.772
	2.197	731.848	Tub4		3.728	751.004	Tub4		2.796	775.97	Tub4		4.26	750.199	Tub4		2.596	883.276	Tub4		3.029	804.027	Tub4		3.994	744.504	Tub4		3.245	781.205	Tub4		2.995	854.906	Tub4		5.392	810.025	Tub4
	0.366	23942	4045.47		0.383	33279.1	6300.27		0.416	21271.4	3683.76		0.466	47452.7	11474.5		0.383	30750.2	5321.17		0.399	18506.8	2123.17		0.333	17013.5	1650.41		0.333	18555.4	2211.93		0.383	24277.9	3956.67		0.333	47553.9	8453.66
	1.298	16005.5			1.248	21877.6			1.165	15578.2			1.398	31037.1			1.448	20531.6			1.365	14741			1.265	13362			1.265	13661.5			1.098	17550.7			1.248	28941.3
			Tub1
	0.416	1006.8	107.062
	3.994	776.246	Tub4
	0.383	27739.7	4648.58
	1.032	20106.8
	Isy125 manip II
			Tub1				Tub1				Tub1				Tub1				Tub1				Tub1				Tub1				Tub1				Tub1				Tub1
	0.416	881.56	89.2016		0.416	850.28	66.172		0.416	964.64	104.037		0.599	1079.08	171.508		0.416	1151.8	136.857		0.416	911.44	65.0857		0.416	987.84	106.021		0.416	794.04	50.5366		0.416	791.56	46.7719		0.416	973.92	108.198
	4.809	685.682	Tub4		5.392	703.485	Tub4		3.461	744.611	Tub4		5.059	826.661	Tub4		5.392	848.198	Tub4		5.375	767.093	Tub4		6.324	749.747	Tub4		3.029	689.242	Tub4		3.994	690.838	Tub4		4.526	737.735	Tub4
	0.333	22019.3	2663.12		0.416	17711.3	2395.48		0.399	26198.9	4829.19		0.433	46223.8	9164.79		0.533	34193.7	8025.82		0.349	23748.2	3378.29		0.599	19026.3	4498.4		0.399	15601.5	2185.94		0.266	11613	539.942		0.549	26621.9	4811.38
	1.381	15950.4			1.381	13687.5			1.248	17965.2			1.082	33528.2			1.182	25925.9			1.182	16926.4			1.132	15490.3			1.165	11999.3			0.849	10219.1			1.398	21299.6
			Tub1				Tub1				Tub1				Tub1				Tub1				Tub1				Tub1				Tub1				Tub1				Tub1
	0.416	1100.6	112.228		0.416	1130.68	144.193		0.416	1085.96	108.329		0.416	1092.68	126.153		0.416	1125.52	154.246		0.416	1029.64	113.46		0.416	884.44	48.2261		0.416	1142.36	158.71		0.416	1097.4	131.524		0.416	919.96	83.4352
	3.495	862.933	Tub4		5.658	809.547	Tub4		5.392	845.645	Tub4		2.812	834.29	Tub4		5.392	783.343	Tub4		3.744	787.204	Tub4		4.243	779.878	Tub4		3.744	803.236	Tub4		4.809	808.585	Tub4		3.029	746.94	Tub4
	0.533	30715.9	5214.39		0.566	41881.8	11154.3		0.433	40951.9	7159.06		0.599	52860.9	10110.5		0.533	22035.6	5393.52		0.466	33671.2	6521.36		0.366	19552.6	1959.71		0.682	31219.7	11035		0.499	55082.6	12977.9		0.449	32750.6	6152.8
	1.231	25168.7			1.298	30768			1.331	29797			1.198	44421.4			1.598	15291.6			1.281	24767.8			1.315	15688.5			1.631	21805.2			1.431	38143.9			1.215	24111.3
			Tub1				Tub1				Tub1				Tub1				Tub1				Tub1				Tub1				Tub1				Tub1
	0.416	963.08	86.67		0.416	1043.96	99.1239		0.416	1118.64	125.931		0.416	1003.12	70.1095		0.416	950.72	100.456		0.416	1060.8	125.966		0.416	930.92	89.3327		0.416	995.04	92.8043		0.416	983.44	106.776
	3.029	783.352	Tub4		3.894	831.137	Tub4		3.728	849.701	Tub4		5.092	848.356	Tub4		4.26	732.82	Tub4		3.495	794.038	Tub4		3.495	741.738	Tub4		5.691	788.26	Tub4		5.691	745.529	Tub4
	0.582	21355.7	4746.08		0.466	27119.1	5400.19		0.483	34769.5	7982.74		0.499	15155.9	2869.85		0.599	26896.6	6016.61		0.599	39028.7	9725.34		0.566	17106.7	3263.38		0.549	25114.7	4408.6		0.466	35951.8	7748.15
	1.315	16810.1			1.331	19588			1.365	24090.3			1.298	11615.7			1.398	21155.9			1.265	30480.8			1.331	13792.8			1.498	20027.5			1.298	25294.2
