# Supplementary material for: A stable microtubule bundle formed through an orchestrated multistep process controls quiescence exit
Source: eLife. 2024 Mar 25;12:RP89958. doi: 10.7554/eLife.89958 (PMC10963028; doi:10.7554/eLife.89958)
Supplement: Figure 1—figure supplement 1—source data 3. [file elife-89958-fig1-figsupp1-data3.xlsx]

## Sheet: Feuil1
		Methylene blue
		Late treatment					% viab			Early treatment																			Microdissection
				dead cell	viab cell								dead cell	viab cell								dead cell	viab cell
		1 days	Y2349-1	24	223	0.902834	0.919624		data1	0 glc +24h treatment	DMSO	Y2348-1	17	198	0.92093	0.922465		data4	0 glc +24h treatment	DMSO	Y2348-1	9	256	0.966038	0.960462														4 days
			Y2349-2	19	214	0.918455	0.0139855					Y2348-2	19	231	0.924	0.00217065					Y2348-2	12	254	0.954887	0.00788461
			Y2349-3	17	253	0.937037					NOC	Y2348-1	17	198	0.92093	0.92093				NOC	Y2348-1	19	255	0.930657	0.930657						Y2349-1	6	104	0.945455
			Y2349-4	19	219	0.920168									#DIV/0!	#DIV/0!						5	232	0.978903	0.0341151
		4 days	Y2349-1	39	255	0.867347	0.91097			0 glc +24h treatment+ WO 4d	DMSO	Y2348-1	24	197	0.891403	0.922974			0 glc +24h treatment+ WO 2d	DMSO	Y2348-1	14	312	0.957055	0.957055					4 days
			Y2349-2	21	248	0.921933	0.029947					Y2348-2	13	273	0.954545	0.0446487					Y2348-2			#DIV/0!	#DIV/0!
			Y2349-3	18	261	0.935484					NOC	Y2348-1	119	255	0.681818	0.681818				NOC	Y2348-1	42	187	0.816594	0.816594						Y2349-1	6	104	0.945455
			Y2349-4	22	250	0.919118									#DIV/0!	#DIV/0!					Y2348-2			#DIV/0!	#DIV/0!
	4 days +24h treatment	DMSO	Y2349-1	74	270	0.784884	0.86239			0 glc +24h treatment+ WO 6d	DMSO	Y2348-1	19	258	0.931408	0.929372			0 glc +24h treatment+ WO 4d	DMSO	Y2348-1	9	209	0.958716	#DIV/0!				4 days +24h treatment	DMSO
			Y2349-2	63	293	0.823034	0.0722762					Y2348-2	21	268	0.927336	0.00287955					Y2348-2			#DIV/0!	#DIV/0!
			Y2349-3	23	197	0.895455					NOC	Y2348-1	62	260	0.807453	0.807453				NOC	Y2348-1	145	147	0.503425	0.503425
			Y2349-4	12	211	0.946188									#DIV/0!	#DIV/0!					Y2348-2			#DIV/0!	#DIV/0!
		NOC	Y2349-1	66	273	0.80531	0.847606						dead cell	viab cell					0 glc +24h treatment+ WO 5d	DMSO	Y2348-1	25	270	0.915254	0.95065					NOC
			Y2349-2	74	266	0.782353	0.0636749		data2	0 glc +24h treatment	DMSO	Y2348-1	6	213	0.972603	#DIV/0!					Y2348-2	3	212	0.986047	0.0500577
			Y2349-3	18	192	0.914286						Y2348-2			#DIV/0!	#DIV/0!				NOC	Y2348-1	106	279	0.724675	0.738322
			Y2349-4	30	239	0.888476					NOC	Y2348-1	7	201	0.966346	0.966346					Y2348-2	126	382	0.751969	0.0192992
	4 days +24h treatment+ 1day	DMSO	Y2349-1	16	186	0.920792	0.928269								#DIV/0!	#DIV/0!			0 glc +24h treatment+ WO 6d	DMSO	Y2348-1	28	202	0.878261	0.929552				4 days +24h treatment+ 1day	DMSO
			Y2349-2	15	186	0.925373	0.0156244			0 glc +24h treatment+ WO 6d	DMSO	Y2348-1	5	212	0.976959	0.969062					Y2348-2	5	256	0.980843	0.0725365
			Y2349-3	19	207	0.915929						Y2348-2	8	198	0.961165	0.0111677				NOC	Y2348-1	119	231	0.66	0.716444						Y2349-1	12	58	0.828571
			Y2349-4	10	194	0.95098					NOC	Y2348-1	84	203	0.707317	0.707317					Y2348-2	129	439	0.772887	0.0798234
		NOC	Y2349-1	40	212	0.84127	0.908536					Y2348-2	95	238	0.714715	0.00523092			0 glc +24h treatment+ WO 9d	DMSO	Y2348-1	29	215	0.881148	0.881148					NOC
			Y2349-2	22	187	0.894737	0.0542867			0 glc +24h treatment+ WO 9d	DMSO	Y2348-1	34	284	0.893082	0.917969					Y2348-2			#DIV/0!	#DIV/0!
			Y2349-3	17	221	0.928571						Y2348-2	14	231	0.942857	0.0351965				NOC	Y2348-1	177	134	0.430868	0.479693						Y2349-1	32	68	0.68
			Y2349-4	7	223	0.969565					NOC	Y2348-1	110	172	0.609929	0.609929					Y2348-2	124	139	0.528517	0.0690482
	4 days +24h treatment+ 4days	DMSO	Y2349-1	49	225	0.821168	0.871731					Y2348-2	126	235	0.65097	0.02902			0 glc +24h treatment+ WO 11d	DMSO	Y2348-1	28	211	0.882845	0.882845				4 days +24h treatment+ 4days	DMSO
			Y2349-2	33	276	0.893204	0.0403863			0 glc +24h treatment+ WO 13d	DMSO	Y2348-1	35	278	0.888179	0.888408					Y2348-2			#DIV/0!	#DIV/0!
			Y2349-3	21	221	0.913223						Y2348-2	49	391	0.888636	0.000323466				NOC	Y2348-1	103	97	0.485	0.442213
			Y2349-4	46	281	0.859327					NOC	Y2348-1	226	277	0.550696	0.550696					Y2348-2	209	139	0.399425	0.0605105
		NOC	Y2349-1	56	257	0.821086	0.825992					Y2348-2	149	250	0.626566	0.0536486			0 glc +24h treatment+ WO 13d	DMSO	Y2348-1	43	237	0.846429	0.846429					NOC
			Y2349-2	29	293	0.909938	0.0604198			0 glc +24h treatment+ WO 16d	DMSO	Y2348-1	12	254	0.954887	0.944885					Y2348-2			#DIV/0!	#DIV/0!
			Y2349-3	72	299	0.80593						Y2348-2	14	201	0.934884	0.0141446				NOC	Y2348-1	119	153	0.5625	0.567917
			Y2349-4	89	293	0.767016					NOC	Y2348-1	133	281	0.678744	0.678744					Y2348-2	160	215	0.573333	0.00766032
	4 days +24h treatment+ 5days	DMSO	Y2349-1	44	375	0.894988	0.922499					Y2348-2	121	212	0.636637	0.0297744			0 glc +24h treatment+ WO 16d	DMSO	Y2348-1	40	271	0.871383	0.871383				4 days +24h treatment+ 5days	DMSO
			Y2349-2	52	270	0.838509	0.0684102			0 glc +24h treatment+ WO 19d	DMSO	Y2348-1	108	285	0.725191	0.808541					Y2348-2			#DIV/0!	#DIV/0!
			Y2349-3	5	201	0.975728						Y2348-2	24	198	0.891892	0.117875				NOC	Y2348-1	128	126	0.496063	0.569357
			Y2349-4	4	204	0.980769					NOC	Y2348-1	135	113	0.455645	0.455645					Y2348-2	124	223	0.642651	0.103654						Y2349-2	13	96	0.880734
		NOC	Y2349-1	10	278	0.965278	0.971831					Y2348-2	111	114	0.506667	0.0360777						dead cell	viab cell							NOC
			Y2349-2	4	164	0.97619	0.00577787						dead cell	viab cell				data5	0 glc +24h treatment+ WO 1d	DMSO	Y2348-1	37	211	0.850806	0.892616
			Y2349-3	6	225	0.974026			data3	0 glc +24h treatment	DMSO	Y2348-1	21	492	0.959064	#DIV/0!					Y2348-2	16	228	0.934426	0.0591281
			Y2349-4												#DIV/0!	#DIV/0!				NOC	Y2348-1	103	195	0.654362	0.758589						Y2349-2	15	95	0.863636
	4 days +24h treatment+ 6days	DMSO	Y2349-1	59	267	0.819018	0.856054				NOC	Y2348-1	80	387	0.828694	0.828694					Y2348-2	38	239	0.862816	0.147399				4 days +24h treatment+ 6days	DMSO									4
			Y2349-2	28	265	0.904437	0.0361978								#DIV/0!	#DIV/0!			0 glc +24h treatment+ WO 4d	DMSO	Y2348-1	69	233	0.771523	0.872604
			Y2349-3	40	244	0.859155				0 glc +24h treatment+ WO 3d	DMSO	Y2348-1	19	474	0.96146	#DIV/0!					Y2348-2	6	222	0.973684	0.142949						Y2349-1	18	93	0.837838
			Y2349-4	67	356	0.841608									#DIV/0!	#DIV/0!				NOC	Y2348-1	161	158	0.495298	0.689826
		NOC	Y2349-1	44	258	0.854305	0.873717				NOC	Y2348-1			#DIV/0!	#DIV/0!					Y2348-2	34	260	0.884354	0.275104					NOC
			Y2349-2	36	361	0.90932	0.030875								#DIV/0!	#DIV/0!			0 glc +24h treatment+ WO 6d	DMSO	Y2348-1	37	220	0.856031	0.810058
			Y2349-3	53	319	0.857527				0 glc +24h treatment+ WO 5d	DMSO	Y2348-1	9	474	0.981366	#DIV/0!					Y2348-2	67	217	0.764085	0.0650161						Y2349-1	20	85	0.809524
			Y2349-4												#DIV/0!	#DIV/0!				NOC	Y2348-1	158	245	0.60794	0.627027
	4 days +24h treatment+ 7days	DMSO	Y2349-1	12	312	0.962963	0.917427				NOC	Y2348-1			#DIV/0!	#DIV/0!					Y2348-2	132	241	0.646113	0.0269918				4 days +24h treatment+ 7days	DMSO	Isy53-1	18	110	0.859375
			Y2349-2	48	254	0.84106	0.0545494								#DIV/0!	#DIV/0!			0 glc +24h treatment+ WO 8d	DMSO	Y2348-1	75	222	0.747475	0.840404
			Y2349-3	16	300	0.949367															Y2348-2	19	266	0.933333	0.131422
			Y2349-4	20	219	0.916318														NOC	Y2348-1	165	228	0.580153	0.57341
		NOC	Y2349-1	25	212	0.894515	0.931608														Y2348-2	156	204	0.566667	0.00953605					NOC	Isy53-1	19	110	0.852713
			Y2349-2	7	201	0.966346	0.0359735												0 glc +24h treatment+ WO 19d	DMSO	Y2348-1	73	339	0.822816	0.822816
			Y2349-3	14	198	0.933962															Y2348-2	58	344	0.855721	0.023268
			Y2349-4																	NOC	Y2348-1	206	242	0.540179	0.540179
	4 days +24h treatment+ 11days	DMSO	Y2349-1	34	236	0.874074	0.874149														Y2348-2			#DIV/0!	#DIV/0!				4 days +24h treatment+ 11days	DMSO
			Y2349-2	49	352	0.877805	0.0600599
			Y2349-3	15	262	0.945848																									Y2349-1	14	110	0.887097
			Y2349-4	71	282	0.798867
		NOC	Y2349-1	29	260	0.899654	0.886456																							NOC
			Y2349-2	27	227	0.893701	0.0179525
			Y2349-3	41	265	0.866013																									Y2349-1	19	110	0.852713
			Y2349-4
	4 days +24h treatment+ 17days	DMSO	Y2349-1	28	275	0.907591	0.890765
			Y2349-2	18	212	0.921739	0.0399425
			Y2349-3	26	238	0.901515
			Y2349-4	50	248	0.832215
		NOC	Y2349-1	28	251	0.899642	0.877767
			Y2349-2	31	321	0.911932	0.0489194
			Y2349-3	64	295	0.821727
			Y2349-4
