# Supplementary material for: A stable microtubule bundle formed through an orchestrated multistep process controls quiescence exit
Source: eLife. 2024 Mar 25;12:RP89958. doi: 10.7554/eLife.89958 (PMC10963028; doi:10.7554/eLife.89958)
Supplement: Figure 1—source data 1. [file elife-89958-fig1-data1.xlsx]

## Sheet: Feuil1
	-2hours		+0		+5		+7		+14		+30		+48		+57		+84		-2hours		+0		+5		+7		+14		+48		+7		+14		+30		+57		+84
	-nocodazole	+nocodazole	-nocodazole	+nocodazole	-nocodazole	+nocodazole	-nocodazole	+nocodazole	-nocodazole	+nocodazole	-nocodazole	+nocodazole	-nocodazole	+nocodazole	-nocodazole	+nocodazole	-nocodazole	+nocodazole	-nocodazole	+nocodazole	-nocodazole	+nocodazole	-nocodazole	+nocodazole	-nocodazole	+nocodazole	-nocodazole	+nocodazole	-nocodazole	+nocodazole	-nocodazole	+nocodazole	-nocodazole	+nocodazole	-nocodazole	+nocodazole	-nocodazole	+nocodazole	-nocodazole	+nocodazole
n=	159	72	197	201	197	209	197	197	325	368	226	214	164	164	278	255	309	326	65	55	75	225	162	152	163	173	121	222	217	119	146	249	203	235	238	203	194	338	291	212
Mean	0.478245	0.334611	0.785396	0.754328	0.814345	0.80456	0.895701	0.827736	0.995766	0.777413	1.3829	1.00446	1.53719	1.03974	1.45826	1.35818	1.30824	1.37226	0.438846	0.328727	0.81628	0.820542	0.810827	0.760434	0.898129	0.82285	1.28753	1.04873	1.52592	1.24951	0.807986	0.809695	1.09995	0.871319	1.20185	0.949113	1.48845	1.50302	1.57993	1.51052
SD	0.168924	0.115632	0.348296	0.304112	0.360302	0.326768	0.373869	0.338002	0.400126	0.325912	0.5519	0.357991	0.614411	0.392658	0.539601	0.405893	0.46395	0.501882	0.193409	0.0975379	0.408593	0.307991	0.367541	0.328528	0.4094	0.377123	0.859466	0.414809	0.835022	0.502528	0.341698	0.288461	0.427446	0.349775	0.467678	0.334358	0.503805	0.456617	0.560738	0.496657
T-test	2.04588e-12		0.344153		0.774956		0.0591439		2.38688e-14		2.3445e-16		2.33192e-16		0.0153556		0.0953861		0.000112428		0.934143		0.200624		0.0810492		0.00456934		0.000182992		0.959573		3.10305e-09		1.28049e-10		0.74013		0.143495
intra-t-test	0.15454	0.756571	0.563466	0.0262823	0.927504	0.207563	0.953583	0.896247	0.000453445	1.5627e-15	0.00020321	0.106898	0.930857	0.000195091	0.534197	5.23296e-05	2.48525e-10	0.00178721
	data1	data1	data1	data1	data1	data1	data1	data1	data1	data1	data1	data1	data1	data1	data1	data1	data1	data1	data2	data2	data2	data2	data2	data2	data2	data2	data2	data2	data2	data2	data3	data3	data3	data3	data3	data3	data3	data3	data3	data3
	0.743	0.172	0.42	0.767	1.144	1.28	0.981	2.122	1.56	1.302	1.932	1.096	2.322	1.805	1.103	2.486	1.424	1.506	0.413	0.304	0.332	0.775	1.31	1.173	1.431	1.195	0.505	0.762	1.158	1.24	1.316	1.693	1.29	0.83	1.25	1.28	2.14	1.39	2.01	2.17
	0.612	0.318	0.767	0.756	0.851	0.493	1.228	0.871	0.537	0.35	1.211	1.413	1.574	1.539	1.516	1.718	1.521	1.165	0.413	0.584	0.332	1.121	0.479	1.28	1.551	1.284	0.809	1.468	2.463	1.793	0.827	0.824	1.41	0.99	1.41	0.78	1.42	1.63	2.22	1.99
	0.368	0.387	1.409	1.072	0.532	0.332	1.228	1.148	0.388	0.52	1.103	1.276	1.929	1.876	1.484	1.271	0.939	2.516	0.413	0.584	0.332	1.637	0.501	0.881	0.735	1.224	0.377	1.199	1.646	1.06	0.665	0.69	1.53	1.02	1.75	0.7	1.11	1.69	2.13	1.2
	0.232	0.26	1.061	0.388	0.775	0.39	0.696	0.759	0.981	1.308	1.155	0.742	1.31	1.14	3.644	1.632	1.174	1.768	0.595	0.413	0.551	0.52	0.532	0.548	1.402	1.01	2.941	1.147	1.461	0.947	1.013	0.775	1.45	0.75	1.25	1.06	1.83	0.72	1.79	0.95
	0.275	0.266	0.69	0.678	0.791	1.586	1.298	0.456	1.477	0.752	3.036	0.832	2.899	1.484	2.569	1.746	0.534	2.077	0.551	0.129	0.775	0.693	1.607	1.488	0.589	0.817	2.183	0.7	1.429	0.593	1.38	0.47	0.43	0.48	1.56	1.18	0.81	1.03	1.17	1.58
	0.365	0.593	0.881	0.684	1.221	1.11	0.838	0.649	0.953	1.032	2.403	0.775	2.14	0.716	1.658	1.155	1.278	1.438	0.838	0.129	0.161	0.658	1.053	1.428	0.871	0.922	1.304	0.895	0.6111	1.174	1.419	0.593	1.14	0.86	2.2	0.58	0.81	1.91	1.09	1.61
	0.427	0.228	0.485	0.62	0.755	1.026	0.683	0.228	0.349	0.544	0.94	1.448	1.63	0.394	0.987	1.096	0.987	1.935	0.392	0.129	0.6	0.83	0.525	0.908	1.04	0.574	1.072	0.574	0.9431	0.516	0.479	0.797	1.23	0.35	1.31	0.44	0.81	1.17	2.2	1.82
	0.715	0.216	1.496	0.832	0.742	1.228	0.735	0.912	1.217	0.884	1.438	1.02	1.487	1.571	1.544	1.903	1.893	2.144	0.658	0.129	1.971	0.672	0.645	1.097	0.881	1.047	2.81	1.374	0.9431	0.516	1.184	0.759	0.65	0.73	1.46	0.58	2.82	1.77	2.35	1.2
	0.164	0.216	0.449	0.376	1.11	1.029	0.476	1.347	1.113	0.875	1.258	0.41	1.451	1.2	2.482	1.877	1.533	1.098	0.347	0.413	0.787	1.222	0.347	0.832	0.501	0.892	0.985	0.871	2.236	1.894	0.695	0.662	1.38	0.83	2.17	1.44	1.07	1.25	1.39	1.2
	0.269	0.368	0.665	0.368	1.482	0.479	0.917	0.39	1.234	0.443	1.621	0.765	2.26	1.194	1.596	1.463	1.194	1.623	0.698	0.327	0.684	0.616	0.252	0.75	0.62	0.361	0.456	0.616	2.19	2.203	0.775	0.774	1.72	1.16	1.89	0.68	1.69	1.15	1.51	1.43
	0.274	0.304	0.801	1.082	0.492	1.118	0.791	0.937	1.405	1.168	0.917	1.347	2.268	0.904	1.169	1.145	2.02	1.676	0.664	0.327	0.692	0.327	1.128	1.024	1.422	0.593	1.284	1.521	2.866	1.356	1.102	0.748	1.19	1.12	1.36	1.26	1.6	1.32	0.61	1.61
	0.538	0.343	1.003	0.817	0.797	1.033	0.824	0.563	0.996	0.912	1.676	1.113	1.688	1.292	1.651	1.256	1.52	1.528	0.266	0.251	0.78	1.224	1.683	0.292	0.606	1.132	0.89	1.395	1.943	1.356	0.504	0.626	1.33	0.82	1.56	1.08	2.13	0.57	0.61	0.66
	0.34	0.42	1.131	0.365	1.294	0.714	1.091	0.356	1.241	0.783	1.054	1.04	0.439	1.647	1.532	1.389	0.608	1.847	0.387	0.219	0.593	0.525	1.065	0.377	1.091	0.52	1.002	0.752	0.6947	2.014	0.593	0.419	1.92	0.82	1.31	0.78	1.65	0.57	1.6	2.33
	0.376	0.377	0.52	0.623	1.122	0.816	1.212	1.204	1.189	0.992	1.879	1.327	1.351	1.209	1.385	1.739	1.258	0.485	0.387	0.272	0.347	0.955	0.52	0.355	0.868	0.449	3.496	1.04	3.174	1.508	0.322	0.678	0.94	1.48	1.03	0.78	1.64	0.57	2.35	2.16
	0.672	0.462	1.5	0.456	0.394	0.488	0.337	1.189	1.344	0.43	1.673	0.936	1.58	1.485	0.775	1.703	1.538	1.48	0.443	0.219	0.347	0.73	0.456	1.31	0.595	1.013	1.419	0.31	2.97	1.87	0.479	1.272	1.4	0.91	0.43	0.68	2.46	2.09	0.52	1.6
	0.353	0.347	0.962	0.643	0.714	1.033	0.485	1.327	0.574	0.988	2.138	1.189	0.505	0.987	1.326	1.101	1.755	1.033	1.192	0.219	0.678	0.903	0.968	0.502	0.376	0.867	0.277	1.372	1.325	1.361	1.432	0.51	0.99	1.1	1.58	0.56	1.47	1.43	0.52	1.58
	0.439	0.347	0.207	0.581	0.806	0.707	1.065	0.549	1.002	1.229	1.4	1.391	1.148	0.775	1.065	0.636	1.01	1.775	0.608	0.424	0.917	0.912	0.347	0.635	0.913	0.753	1.977	0.716	1.731	1.754	1.217	0.917	1.19	0.9	1.2	0.74	1.76	1.51	2.12	1.71
	0.555	0.616	0.465	0.868	0.529	1.056	0.613	0.64	0.867	0.476	1.148	1.235	1.163	0.767	1.533	1.244	1.749	1.643	0.262	0.275	1.072	0.561	0.29	0.725	0.752	1.316	1.198	0.544	1.878	1.754	0.829	1.025	0.98	0.9	2.52	1.22	1.98	1.14	2.09	1.33
	0.396	0.439	0.39	0.829	1.348	1.05	1.074	0.563	1.01	0.712	0.979	0.852	1.785	1.273	1.4	1.013	1.788	0.686	0.262	0.275	0.962	0.389	0.548	0.892	0.821	0.318	1.078	0.712	0.7607	0.76	0.274	1.04	1.88	0.43	0.4	0.82	1.79	0.88	2.28	1.9
	0.269	0.439	0.525	0.645	0.548	0.322	1.399	0.912	0.479	1.223	1.335	1.29	1.824	1.517	1.174	1.226	0.71	1.89	0.262	0.31	0.51	0.693	0.548	0.577	0.798	0.742	1.777	0.465	1.135	1.165	1.024	0.43	0.3	0.43	1.62	0.94	1.33	2.22	1.48	1.59
	0.376	0.297	0.322	0.847	0.388	0.616	0.47	0.868	0.563	0.443	2.144	0.939	1.761	1.683	1.102	0.671	0.708	1.653	0.473	0.31	0.793	1.377	0.584	0.665	0.847	1.323	1.699	0.68	2.427	1.532	0.532	0.541	0.3	1.17	1.68	0.92	0.63	1.8	1.89	0.94
	0.585	0.343	0.392	0.806	0.479	0.678	0.665	0.942	0.841	0.347	1.548	1.31	4.192	1.113	1.601	1.819	1.122	0.913	0.272	0.355	1.154	0.775	1.013	0.347	0.612	1.045	1.174	1.218	2.048	1.421	0.368	1.217	0.72	0.71	1.03	1.24	0.63	1.79	2.58	1.89
	0.422	0.448	0.824	0.822	0.728	0.479	1.168	0.752	0.848	0.843	2.266	0.917	2.001	1.674	2.483	1.551	0.708	2.473	0.262	0.367	1.128	0.774	0.608	0.677	0.52	0.923	0.898	0.574	1.218	1.49	1.267	0.462	0.95	0.73	1.07	0.44	1.23	1.09	2.18	1.52
	0.477	0.343	0.822	0.343	0.949	0.563	0.847	1.091	0.68	0.973	1.647	1.154	1.745	0.793	2.354	0.865	1.161	1.101	0.8	0.473	0.361	0.518	0.616	0.574	1.271	0.721	0.707	1.078	1.395	1.434	0.404	1.136	1.34	1.3	0.87	0.8	1.78	1.84	1.48	1.75
	0.621	0.43	0.52	0.937	0.68	0.767	0.394	0.42	1.824	1.179	0.639	0.91	1.847	0.829	1.987	1.539	1.612	1.642	0.693	0.389	0.453	1.254	0.807	0.356	1.156	1.258	0.829	1.29	1.068	2.36	0.458	1.571	1.25	0.72	1.07	0.8	1.83	2.16	2.95	1.61
	0.599	0.246	1.091	1.002	0.698	1.857	0.388	0.456	0.959	0.443	1.91	1.033	0.937	1.108	2.06	1.638	2.049	1.627	0.37	0.52	1.604	1.085	0.871	0.908	0.51	0.827	1.51	1.393	3.351	1.466	0.564	0.968	0.95	0.72	0.93	0.82	1.4	1.9	0.6	1.68
	0.569	0.276	1.072	0.844	0.571	0.337	0.816	0.643	0.817	0.385	0.686	0.847	0.742	1.578	1.184	1.697	1.002	1.477	0.37	0.31	0.958	0.655	1.271	0.595	1.261	0.865	1.096	0.86	2.471	1.376	0.812	0.563	1.65	0.61	1.46	0.96	1.41	1.73	0.6	0.98
	0.289	0.433	0.419	0.798	0.696	0.458	1.389	1.012	0.892	0.523	1.279	0.839	1.487	0.534	0.829	1.216	1.354	2.623	0.313	0.347	0.491	1.35	1.068	0.408	0.413	0.413	1.246	0.463	2.316	1.146	0.698	0.953	1.14	0.35	0.28	0.52	2.33	1.78	1.25	1.32
	0.675	0.419	1.239	0.584	0.26	0.297	0.465	0.557	0.967	0.805	0.871	0.517	2.193	0.841	1.588	0.665	0.387	2.106	0.313	0.396	0.645	0.939	1.304	0.322	1.155	1.091	1.616	0.463	0.6464	1.339	0.953	0.571	0.83	0.35	0.87	0.52	1.49	1.58	1.9	1.79
	0.495	0.623	1.126	0.548	0.413	0.953	0.684	0.439	0.634	0.999	0.476	1.151	1.336	0.504	2.837	1.496	1.297	1.417	0.313	0.304	0.433	1.168	0.886	0.689	1.228	0.645	1.165	0.463	1.992	2.764	1.284	0.785	1.48	0.57	1.21	1.34	1.52	1.45	1.08	3.23
	0.624	0.616	1.143	0.419	0.626	0.983	0.612	0.88	0.439	1.048	1.305	1.054	2.253	1.072	1.71	1.3	0.698	1.351	0.313	0.387	0.433	0.449	0.779	0.488	0.485	0.133	1.012	1.79	0.9824	1.026	1.328	1.112	1.4	1.08	0.84	0.9	1.16	1.73	2.15	1.16
	0.322	0.448	0.356	0.479	0.673	0.777	0.476	1.343	0.779	0.563	2.387	0.753	2.293	1.169	1.276	1.004	2.041	1.144	0.336	0.424	0.616	1.435	1.406	1.328	1.391	0.653	0.692	1.29	2.123	1.026	0.394	1.318	0.72	1.08	1.69	0.44	1.09	2.28	1.72	2.35
	0.355	0.419	0.516	0.297	0.419	0.983	0.88	0.955	1.001	1.187	1.87	1.194	1.112	1.072	1.05	1.785	1.612	1.272	0.258	0.355	1.212	0.885	1.096	0.356	1.004	0.775	0.851	2.043	2.109	1.088	0.577	0.501	0.82	0.61	2.61	1.28	2.11	0.9	0.94	1.39
	0.411	0.529	1.444	0.684	0.365	0.745	1.457	0.593	1.271	0.722	1.486	1.258	0.922	0.671	1.582	1.724	1.811	1.496	0.365	0.272	0.616	0.939	1.001	0.376	0.827	1.214	0.716	0.716	1.538	1.599	0.837	0.465	1.25	0.47	1	0.64	1.33	0.67	1.93	1.38
	0.538	0.419	0.551	0.456	1.683	0.623	0.525	1.254	0.877	0.791	2.553	0.949	1.155	1.487	1.995	1.091	1.335	0.563	0.396	0.406	0.881	0.532	0.695	0.541	0.861	0.735	0.798	0.716	1.849	1.847	0.571	0.829	0.72	0.47	1.81	1.04	1.34	1.59	2.18	1.47
	1.346	0.557	1.143	0.58	1.214	0.368	0.377	0.779	0.939	0.948	1.457	0.806	1.66	1.224	2.296	0.653	0.841	0.695	0.389	0.347	0.43	0.822	0.456	1.004	1.588	0.51	2.8	0.736	2.737	0.88	1.918	0.798	1.85	0.82	2.72	0.72	1.69	0.89	1.26	1.05
	0.301	0.322	0.347	0.868	0.555	0.525	1.088	0.6	1.612	0.308	0.797	0.636	2.011	1.193	1.387	1.702	1.853	1.658	0.275	0.304	0.505	0.347	0.806	0.322	0.537	0.636	0.501	0.914	2.253	0.88	0.529	0.868	1.08	1.53	1.68	0.94	0.72	0.96	2.98	1.82
	0.322	0.288	0.745	0.704	0.975	0.493	0.696	1.129	0.557	0.852	0.753	0.852	1.504	0.68	0.662	1.431	1.323	1.48	0.275	0.275	0.581	1.196	0.775	0.368	0.673	0.324	0.968	0.769	0.877	0.947	0.844	1.082	1.16	0.62	0.55	0.8	0.72	1.68	0.84	1.82
	0.409	0.288	0.318	0.955	1.489	0.277	1.209	0.541	1.169	1.058	2.453	1.173	1.669	1.897	1.388	1.56	1.995	1.104	0.275	0.37	0.972	1.004	1.482	0.479	1.211	0.324	0.922	1.316	0.877	0.715	0.759	0.349	1.04	2.04	1	0.46	2.43	0.97	1.89	0.77
	0.358	0.332	0.767	0.365	0.848	0.392	0.653	1.258	1.316	0.751	0.809	1.866	2.126	0.935	1.744	0.959	1.168	1.072	0.275	0.355	1.091	0.886	1.833	0.987	1.19	0.557	1.496	0.37	1.276	0.621	0.905	0.555	0.67	0.9	1.32	0.84	1.55	1.04	2.67	1.71
	0.388	0.266	0.847	0.424	1.499	0.462	0.68	1.013	0.756	1.206	1.037	0.957	1.33	1.102	1.123	1.184	1.744	0.517	0.406	0.37	1.136	0.539	0.989	0.924	0.634	0.51	0.88	1.207	1.42	1.634	0.51	0.68	0.85	1.67	2.27	0.84	1.08	1.58	1.67	1.63
	0.313	0.277	0.592	0.41	1.615	0.581	1.012	1.012	1.356	0.563	1.008	0.959	1.575	1.204	1.843	1.602	0.892	0.552	0.275	0.262	0.939	1.52	0.704	0.485	0.306	1.205	1.659	0.385	1.851	0.828	0.577	0.868	1.06	0.4	1.56	0.88	1.08	1.87	1	1.68
	0.402	0.26	0.479	0.616	0.639	0.479	1.361	1.2	0.745	0.518	1.096	1.198	2.106	0.571	1.63	1.126	1.422	2.25	0.355	0.347	0.449	0.43	1.258	0.923	1.354	0.897	1.066	0.99	2.929	0.828	0.462	0.917	0.34	0.4	2.03	0.32	1.61	1.66	1	1.42
	0.504	0.276	0.552	0.388	0.692	0.929	0.52	0.847	1.567	0.675	1.163	1.551	1.744	1.444	1.413	1.714	1.91	1.01	0.192	0.355	0.981	1.31	1.809	1.002	0.892	0.923	1.258	0.83	2.279	0.727	0.865	0.913	0.34	0.4	1.39	0.66	1.82	1.22	1.46	1.63
	0.35	0.204	1.198	0.909	0.841	0.755	1.069	0.525	0.989	0.93	1.264	0.781	0.824	0.42	1.706	1.94	1.119	2.041	0.272	0.344	1.008	0.845	0.456	0.318	1.091	0.996	0.94	1.23	1.525	0.727	0.78	1.025	1.71	1.17	1.74	1.14	0.61	0.72	1.46	2.27
	0.356	0.424	0.752	0.626	0.923	0.822	1.389	0.887	1.264	0.748	1.851	1.145	2.76	1.571	1.854	0.462	1.229	1.871	0.43	0.344	0.71	0.262	0.388	0.404	0.424	0.424	2.108	0.616	0.8865	1.508	0.577	0.97	1.75	1.51	1.35	1.04	1.47	1.27	1.46	0.98
	0.406	0.42	0.449	0.797	0.68	1.078	0.837	0.665	0.847	0.664	0.133	0.41	0.752	0.959	1.542	1.271	1.788	2.309	0.62	0.344	0.989	0.262	0.653	0.252	0.806	0.64	0.922	0.616	3.351	1.451	0.246	0.68	1.31	1.38	1.4	0.52	2.12	1.34	1.46	0.98
	0.435	0.318	0.996	0.42	1.737	0.698	0.368	0.822	0.873	0.73	0.399	0.635	1.454	0.9	1.516	1.214	1.271	1.757	0.626	0.347	0.981	1.648	0.399	0.643	1.029	0.574	0.981	0.344	1.429	1.172	0.68	0.837	0.6	1.33	0.61	0.52	1.66	1.27	2.31	1.35
	0.534	0.216	0.368	0.742	1.012	0.781	0.525	1.01	0.584	0.843	1.462	1.276	2.042	1.173	1.588	1.189	1.259	0.97	0.907	0.301	1.187	0.544	0.677	1.148	1.42	0.41	0.93	1.414	1.05	1.458	1.932	1.032	0.82	1.05	1.36	0.54	1.45	1.35	0.53	1.35
	0.496	0.419	1.054	0.785	0.731	0.525	0.492	0.97	1.369	0.502	1.004	1.037	2.037	1.165	1.258	1.392	1.411	0.485	0.347	0.37	0.456	0.721	0.777	0.361	0.735	1.494	0.73	1.648	1.954	0.769	0.881	0.47	1.62	1.17	1.56	0.96	1.26	1.32	2.1	1.83
	0.688	0.228	0.26	0.62	0.434	1.347	0.683	1.264	0.563	0.919	1.097	1.645	0.852	1.514	1.807	1.469	1.144	1.134	0.424	0.347	1.851	0.574	0.387	0.847	0.775	0.525	1.995	0.779	1.91	0.769	0.479	1.112	1.31	0.47	1.37	1.26	1.99	1.88	2.43	1.82
	0.413	0.368	0.797	1.259	0.626	0.465	0.949	0.324	1.091	1.211	0.58	1.084	0.653	0.837	1.078	1.152	1.484	1.761	0.532	0.288	0.69	0.574	1.14	1.529	1.14	0.826	0.424	0.779	2.828	1.963	0.404	1.289	0.86	0.47	0.87	0.9	1.07	2.04	2.07	1.26
	0.328	0.297	1.097	0.161	0.484	0.942	1.128	0.634	1.491	0.809	0.777	1.034	2.207	1.385	1.42	1.056	0.399	1.942	0.912	0.182	0.636	0.86	1.013	1.354	0.304	0.952	1.129	0.457	1.659	0.815	0.413	1.151	1.1	0.47	0.65	0.54	2.06	2.3	0.62	2.01
	0.395	0.297	0.525	1.246	0.252	1.05	1.236	0.456	0.88	1.09	1.258	0.935	0.923	0.851	1.246	0.952	0.52	1.126	0.49	0.251	0.563	1.379	0.785	1.156	0.529	0.634	0.42	1.293	1.313	1.261	0.857	0.71	1.56	1.33	0.95	1.04	1.43	1.9	0.62	1.77
	0.406	0.228	0.42	1.119	0.806	0.822	0.917	1.104	0.886	0.559	1.602	0.807	2.011	0.643	1.428	0.918	1.444	1.14	0.49	0.43	0.377	0.525	0.51	0.748	2.488	0.525	1.004	0.523	1.548	1.486	0.968	0.877	0.79	1.24	1.31	0.3	1.44	2.15	0.8	0.23
	0.275	0.347	1.271	0.266	0.493	0.394	1.29	1.02	0.541	0.937	1.183	0.985	1.245	0.912	1.549	0.551	0.387	1.471	0.626		0.419	1.47	0.51	0.258	0.419	0.851	0.923	1.78	1.853	1.385	0.939	1.129	1.55	0.82	1.56	1.18	1.44	1.52	2.11	1.38
	0.564	0.258	0.761	0.652	0.898	1.11	0.949	1.264	0.216	0.558	0.548	1.342	1.001	0.721	1.635	1.169	1.604	1.69	0.396		0.453	0.835	0.707	0.847	0.318	0.923	1.956	2.351	2.135	0.519	0.868	0.897	0.67	0.82	1.11	1.28	1.9	1.06	1.19	1.38
	0.34	0.306	0.26	1.161	0.361	0.42	1.053	1.268	0.276	0.749	0.549	0.557	1.261	0.266	1.866	1.516	1.413	1.2	0.481		0.306	1.054	0.337	0.877	1.991	1.305	0.318	0.673	1.294	1.231	0.97	0.824	1.31	0.95	1.48	0.68	1.59	1.24	1.28	2.35
	0.637	0.228	0.731	0.996	1.361	0.809	0.277	0.318	0.896	1.145	0.944	1.111	2.124	1.047	1.652	0.684	1.615	1.226	0.481		1.155	1.008	0.887	1.045	1.136	1.14	2.678	1.247	2.629	1.231	1.101	0.42	1.09	1.08	1.22	1.1	0.39	1.06	1.33	0.61
	0.383	0.228	0.892	0.233	1.714	0.953	0.501	0.493	1.151	0.763	2.558	1.267	2.721	1.264	1.937	0.476	1.3	0.529	0.272		0.394	0.599	0.829	0.537	0.258	0.479	2.676	1.186	0.6731	1.231	0.745	0.537	1.55	1.06	1.81	0.7	0.39	1.27	2.36	0.61
	0.463	0.174	0.689	0.721	0.592	1.4	0.388	0.235	0.821	0.788	1.33	1.318	1.264	1.619	2.786	1.516	0.753	0.78	0.275		0.684	1.062	0.745	0.39	0.424	1.098	0.812	0.626	0.4321	1.298	0.161	0.491	1.03	1.4	2.18	0.96	0.39	1.18	1.89	0.61
	0.52	0.292	0.449	1.3	0.937	0.983	1.136	0.897	0.877	0.595	1.418	1.441	1.103	0.832	1.907	0.912	0.993	0.957	0.275		0.89	0.668	0.616	0.266	0.595	0.892	0.394	1.393	1.429	0.88	0.318	0.551	0.61	1.04	1.64	0.94	1.85	1.09	2.34	2.1
	0.304	0.233	0.968	0.29	0.47	0.51	0.376	0.525	1.335	0.539	0.962	1.3	1.004	0.809	0.868	1.95	1.455	0.491	0.385		1.2	0.946	1.018	0.616	1.482	0.529	0.394	1.248	1.222	0.88	0.564	0.653	1.39	0.82	0.56	1.02	2.33	1.12	1.43	1.59
	0.627	0.216	0.62	0.465	0.492	0.967	0.555	0.39	0.564	1.187	0.608	1.688	1.168	1.428	0.736	2.053	1.295	1.752	0.365		0.581	1.47	0.64	0.306	1.05	1.428	0.394	1.328	1.377	1.339	0.767	0.837	0.73	1.29	1.19	1.62	2.23	1.22	1.66	1.23
	0.473	0.292	0.877	0.887	0.266	0.653	1.432	0.584	0.725	0.985	1.123	0.841	1.417	1.032	2.096	2.265	1.454	1.94	0.304		1.33	0.547	0.917	0.714	0.479	1.068	1.01	0.52	0.6392	1.207	0.479	0.755	1.09	0.95	1.29	0.3	1.15	1.28	1.76	2.59
	0.518	0.564	0.408	0.777	1.485	1.226	1.132	0.736	0.785	0.383	1.102	1.056	2.146	0.329	1.058	2.073	1.451	1.948			1.208	0.547	0.47	1.328	1.228	1.332	1.013	0.8	2.616	1.754	0.824	0.639	1.03	1.01	1.42	0.3	0.95	1.13	1.31	2.16
	0.428	0.188	0.892	0.571	0.745	0.89	1.356	0.68	0.756	1.145	1	1.114	1.391	1.313	1.62	1.764	0.408	2.456			1.416	0.827	0.479	0.822	0.306	0.857	1.174	1.25	2.159	0.498	0.71	0.777	0.77	1.01	0.5	0.86	0.21	1.79	2.22	1.47
	0.262	0.133	0.886	0.476	0.377	0.343	1.126	0.692	1.474	0.413	1.095	1.399	0.501	1.174	1.749	1.297	0.808	1.444			1.14	0.923	0.343	0.714	0.324	0.775	4.689	0.898	1.238	1.113	0.752	0.785	0.77	1.13	0.5	0.88	1.61	1.38	1.4	2.63
	0.426	0.276	0.449	0.564	0.677	0.967	0.547	0.337	0.645	1.247	1.551	1.369	1.189	1.48	2.757	2.02	1.045	1.4			0.47	0.993	0.504	1.151	0.449	1.292	3.064	0.735	1.742	2.655	0.52	0.394	0.77	1.12	0.85	0.94	1.08	0.86	1.4	2.39
	0.587	0.196	0.648	0.9	1.271	0.404	1.091	0.809	0.368	0.598	1.558	1.732	1.875	1.39	0.658	1.088	2.08	1.496			1.05	0.944	0.392	0.865	0.581	0.541	2.009	1.036	2.836	1.683	0.51	0.801	1.64	1.3	0.87	0.56	2.16	0.86	1.4	1.26
	0.38	0.276	0.645	1.605	0.985	0.809	0.492	1.259	1.322	0.783	1.613	1.426	1.449	0.42	0.505	1.326	0.673	2.25			0.923	0.597	0.297	1.002	0.361	0.908	0.537	1.808	2.021	1.49	0.504	0.937	0.43	0.9	0.94	0.56	1.73	2.43	1.37	1.46
	0.705	0.193	1.221	1.284	0.521	0.476	0.555	0.581	0.525	0.972	0.981	0.753	1.3	1.065	1.193	1.33	0.814	1.438			2.165	1.11	1.485	0.439	0.324	0.537	0.581	1.773	1.145	0.863	0.623	0.266	1.31	0.99	0.54	0.56	1.64	1.31	1.8	1.19
	0.38		0.898	1.177	1.05	0.698	1.258	0.871	0.653	0.742	1.259	1.073	0.809	0.935	1.469	1.288	1.441	1.119			0.929	0.626	1.195	0.548	1.241	0.62	3.228	1.181	2.214	0.863	0.649	1.3	0.38	0.82	0.54	0.78	1.88	1.31	1.45	1.6
	0.561		0.47	0.829	0.26	0.439	0.97	1.419	0.777	0.791	1.3	1.084	0.665	0.623	1.621	1.533	1.774	1.452			1.635	0.463	0.756	0.73	0.924	0.541	1.82	1.076	2.969	1.12	1.084	0.982	0.38	0.68	1.31	0.78	1.52	2.48	1.23	1.26
	0.427		1.97	1.028	0.388	0.537	1.01	1.084	1.852	0.502	1.872	0.949	0.785	0.993	1.328	1.265	2.326	2.258			1.14	0.886	1.623	1.438	1.072	0.652	0.993	0.503	1.558	1.882	0.532	0.774	1.25	0.58	0.97	1	0.95	1.11	2.22	1.63
	0.409		0.322	1.194	1.428	0.434	1.152	0.394	0.39	0.898	0.737	1.369	1.174	0.822	1.418	1.297	1.861	1.268				0.693	1.118	0.755	1.187	0.356	1.189	1.524	1.096	1.903	1.01	0.439	1.42	0.5	0.74	1.32	1.59	1.11	1.18	1.23
	0.516		0.26	0.918	1	0.584	1.395	0.922	0.456	0.904	1.775	1.458	1.261	0.592	1.601	1.284	1.961	1.522				0.982	0.839	0.759	0.841	0.696	1.482	1.442	3.282	0.879	1.209	0.748	0.44	1.01	1	0.68	2.13	1.54	1.91	1.15
	0.383		0.626	0.645	0.623	1.97	0.968	0.745	0.548	0.882	2.201	1.638	1.259	0.636	1.354	1.38	0.939	1.551				0.616	1.297	1.28	0.868	0.844	1.101	0.97	1.947	0.879	0.501	0.306	1.39	1.01	1.41	1.18	1.37	0.63	1.71	1.79
	0.487		1.189	0.981	0.564	0.399	0.653	0.216	0.671	0.456	0.62	1.212	1.097	0.593	1.71	1.709	1.241	0.584				0.939	0.806	0.479	0.529	0.595	4.735	1.157	1.472	0.477	1.068	1.231	1.04	1.01	0.6	1.24	2.32	2.07	1.05	1.55
	0.67		0.318	0.861	0.377	0.838	0.944	1.53	1.082	0.662	1.729	1.593	1.428	0.653	1.277	0.297	2.294	1.393				1.157	0.837	0.485	0.847	0.968	1.001	1.707	2.981	0.477	0.775	1.05	1.17	0.4	0.37	1.04	1.73	1.09	1.05	1.75
	0.292		0.419	0.822	0.957	0.322	0.485	0.806	0.388	1.174	2.25	1.056	1.503	0.798	1.861	1.284	1.499	0.361				0.37	0.887	0.277	0.953	1.05	0.479	1.25	3.018	1.195	1.054	0.504	1.05	0.4	0.72	0.7	2.33	1.7	1.05	1.42
	0.534		0.664	0.347	1.131	1.226	0.753	1.013	0.877	0.645	0.424	0.913	2.185	1.543	1.677	0.731	2.116	0.912				0.37	0.493	0.785	1.195	1.276	2.488	1.422	2.128	1.615	0.712	0.62	1.05	0.9	0.9	0.7	1.29	1.37	1.28	1.63
	0.534		0.577	0.939	0.894	0.337	0.716	0.97	1.522	1.402	1.682	1.415	0.612	0.174	0.917	1.838	1.859	2.071				0.865	0.742	1	1.037	0.324	1.302	0.822	2.1	1.165	0.968	0.826	1.35	1.13	1.74	1.3	1.1	1.77	1.51	2.02
	0.529		0.904	0.662	0.571	0.837	1.313	0.563	0.288	1.184	1.02	1.395	1.89	0.832	1.619	1.348	1.484	0.636				0.966	0.226	0.479	0.595	0.343	0.844	1.121	1.371	2.066	1.111	0.88	1.09	1.22	0.85	1.38	1.43	1.04	2.35	1.34
	0.581		0.26	0.277	0.368	0.563	0.448	0.361	0.975	0.491	1.406	1.356	0.981	1.039	1.002	1.341	1.209	1.169				0.182	0.742	1.05	0.837	0.258	0.42	0.827	2.193	1.797	0.892	0.52	0.57	1.06	1.46	0.48	0.96	1.33	2.25	1.12
	0.464		0.306	0.525	0.52	1.195	1.078	0.959	0.929	1.197	1.458	1.529	0.592	1.037	1.336	1.648	1.458	1.566				0.769	0.982	0.616	0.388	0.646	2.126	1.218	1.118	0.756	0.787	0.52	0.76	0.6	1.34	0.68	0.96	1.35	1.7	1.94
	0.337		1.211	0.388	1.096	0.975	0.712	0.671	0.43	1.409	1.774	1.457	1.457	1.183	1.119	1.546	1.419	2.048				0.86	1.209	0.26	0.492	0.64	0.47	1.205	1.718	1.393	0.677	0.716	0.99	1.1	0.8	0.84	0.96	1.19	1.73	1.07
	0.534		1.272	0.704	0.731	0.252	1.01	0.68	0.634	0.973	0.673	0.399	1.028	0.886	0.769	0.94	0.844	1.556				0.982	0.94	0.716	0.937	0.571	0.47	0.43	1.459	1.8	0.89	0.78	0.69	1.1	0.3	1.34	1.39	0.82	2.16	1.35
	0.73		1.004	0.465	0.52	0.319	1.042	1.295	0.97	0.477	0.753	0.949	1.101	0.665	1.066	2.432	0.557	2.032				1.158	0.516	0.755	0.707	2.128	2.057	1.012	1.229	0.46	0.439	0.493	0.69	1.79	0.77	0.82	2.33	0.82	0.88	1.69
	0.427		1.449	0.458	0.42	0.847	0.69	0.408	0.635	0.406	1.764	1.326	1.677	1.212	1.378	1.551	1.174	2.011				1.256	1.453	0.652	1.045	1.756	0.297	0.49	1.909	0.46	0.816	0.962	1.26	0.55	1.02	1.38	1.29	0.82	0.88	2.05
	0.427		1.194	0.347	0.318	0.94	1.378	0.525	0.534	0.927	1.194	0.68	1.645	1.219	1.839	1.169	0.912	1.533				1.284	0.41	1.002	0.871	0.904	1.482	1.283	0.707	1.347	1.013	0.837	1.83	1.16	1	1.02	1.29	0.9	0.88	1.58
	0.611		1.987	0.549	0.571	0.752	1.258	1.245	0.917	1.278	1.234	0.297	1.675	1.415	1.467	1.024	0.52	1.484				0.486	1.539	0.851	0.996	0.769	1.119	0.465	0.707	2.006	1.133	0.78	1.51	1.16	1.44	1.06	1.48	2.23	2.37	1.88
	0.959		0.767	0.665	0.449	1.163	0.721	0.942	0.985	0.927	2.217	1.186	1.506	0.653	0.704	1.984	0.957	1.665				0.486	1.807	0.886	0.521	1.04	0.276	1.254	0.58	1.298	1.255	0.692	0.57	0.43	1.94	1.52	1.71	1.26	1.2	0.74
	0.462		0.525	0.877	0.525	0.937	1.226	0.64	1.601	0.581	1.721	0.857	0.501	0.725	0.806	0.937	1.385	0.917				0.787	0.595	0.439	2.467	0.517	2.902	1.377	0.453	1.298	1.14	0.822	1.46	0.43	0.91	0.54	2.24	1.55	1.5	2.22
	0.481		0.742	0.612	1.133	1.212	0.51	0.806	1.097	0.946	1.737	1.045	0.987	1.032	1.806	1.3	1.187	1.974				0.597	0.877	0.698	1.361	0.42	0.592	1.814	2.189	1.273	0.584	0.581	1.41	0.91	1.47	0.54	2.22	1.05	2.14	0.57
	0.449		1.141	1.827	0.886	0.453	1.304	1.197	0.356	0.857	1.361	1.517	1.458	1.103	1.807	1.189	1.148	1.732				0.769	0.456	0.636	0.608	1.484	0.852	0.516	0.362	1.273	1.46	0.721	1.31	0.91	1.38	1.32	2.31	1.25	1.8	1.99
	0.415		0.645	0.887	1.261	0.775	2.207	0.361	0.985	0.629	1.428	1.632	1.632	1.2	1.575	1.131	1.33	1.128				1.451	1.228	0.871	0.735	0.337	1.217	1.712	1.361	1.325	1.261	0.957	1.42	1.21	1.34	0.96	1.4	0.92	2.5	1.22
	0.473		0.939	0.913	0.987	1.33	0.404	0.51	1.129	0.958	1.129	0.361	0.908	1.289	2.469	1.784	0.935	1.68				0.853	0.564	0.408	0.233	1.012	1.29	1.67	2.085	2.099	0.761	0.959	2.26	1.29	1.76	1.38	2.04	0.92	1.9	1.97
	0.516		1.316	0.832	1.529	1.054	1.361	0.448	1.118	0.743	0.645	0.721	1.739	0.516	0.981	0.877	0.981	0.937				0.779	0.635	0.439	0.413	1.064	2.349	0.903	0.547	1.985	0.737	0.809	0.63	0.73	0.66	1.16	1.96	1.8	1.65	1.4
	0.795		0.707	0.636	0.735	0.94	0.892	1.333	0.981	0.292	1.458	0.936	1.236	1.163	1.343	1.241	1.267	1.154				0.675	1.234	0.47	0.949	0.658	0.318	0.903	3.21	0.403	0.448	1.2	0.63	1.17	1.71	0.94	1.18	2.24	2.24	1.85
	0.345		0.419	0.288	0.838	0.824	0.571	1.168	0.847	1.654	0.646	0.488	0.867	0.462	2.222	0.937	1.909	1.064				0.828	0.42	0.968	0.745	0.826	0.517	1.789	2.915	0.403	0.777	0.716	0.63	1.06	1.79	0.94	1.7	2.13	2.93	1.75
	0.483		0.731	1.491	1.113	0.814	1.645	0.593	0.767	0.945	1.14	0.767	1.29	0.653	1.839	1.446	2.006	1.072				1.039	0.39	0.52	1.061	0.297	0.517	0.817	1.094	1.374	1.336	1.2	1.7	1.26	1.02	0.54	1.55	1.29	0.46	1.46
	0.537		0.868	0.852	1.437	0.837	1.258	0.876	0.742	0.99	2.018	0.658	2.219	0.29	1.276	0.595	2.011	0.777				0.483	0.388	0.62	0.665	0.574	1.516	1.106	1.243	2.059	0.62	1.193	1.48	1.14	1.46	0.54	1.54	2.22	0.46	1.51
	0.517		0.851	1.068	1.428	0.235	0.488	0.6	0.721	0.898	1.964	0.355	1.323	1.466	0.388	1.197	1.258	0.616				0.745	0.646	1.204	1.295	1.108	1.217	0.997	2.371	1.069	0.817	1.098	0.81	1.28	1.37	1.98	1.08	1.77	0.46	2.47
	0.464		0.896	1.271	0.476	0.698	0.94	0.462	1.168	0.47	2.093	0.439	1.078	0.868	1.511	1.288	1.582	1.37				0.904	1.163	0.653	1.897	0.592	1.091	1.554	1.344	1.456	1.169	1.133	1.94	1.42	1.29	0.82	1.43	1.22	1.6	1.87
	0.702		1.371	0.439	0.361	0.868	0.501	0.753	0.689	0.571	1.903	1.064	1.276	1.306	0.962	1.31	1.103	0.972				0.611	0.574	1.419	0.809	1.324	1.14	1.195	1.925	0.651	0.981	0.529	2.71	0.46	1.27	0.62	1.73	1.22	1.43	1.02
	0.525		1.411	1.284	0.266	1.472	0.745	0.9	0.581	0.532	1.583	1.294	1.88	1.466	1.514	1.189	1.2	1.635				0.9	0.485	0.493	0.707	0.707	0.645	1.643	1.261	0.651	0.164	1.136	1.14	0.46	1.36	0.62	2.08	1.63	1.81	0.65
	0.477		0.917	0.753	1.805	0.64	0.616	1.197	0.993	1.278	1.341	0.686	2.212	0.274	1.411	1.02	1.076	1.596				1.356	0.847	1.189	0.851	0.458	1.48	0.7	1.336	0.65	1.112	0.684	1.14	1.02	1.28	1.48	1.44	1.67	1.38	0.65
	0.334		0.807	0.456	0.936	0.887	0.775	1.291	0.88	0.499	2.677	0.626	2.269	0.349	1.265	1.387	1.682	2.415				0.556	0.368	0.894	0.94	1.056	1.271	1.019	2.723	0.65	0.636	0.936	1.14	1.33	1.87	1.12	2.11	2.08	2.21	1.79
	0.417		1.004	0.742	1.174	1.013	0.563	1.163	0.634	1.431	1.101	1.226	1.543	1.471	0.959	1.391	1.991	1.01				0.556	1.743	0.548	1.351	0.71	1.444	0.805	1.741	0.85	0.955	0.822	1.31	1.77	1.16	1.06	2.28	1.73	1.07	1.49
	0.31		0.451	0.894	1.056	1.197	1.183	1.485	0.419	0.777	1.756	1.322	2.701	0.485	2.048	0.809	1.419	0.504				0.888	0.78	0.78	0.636	0.505	0.71	0.393	0.512	1.07	0.968	0.725	1.22	1.25	1.55	1.06	0.64	1.09	1.07	1.33
	0.38		0.549	1.361	0.827	0.968	2.234	1.428	0.626	1.187	0.985	0.69	2.005	1.154	1.809	0.712	0.865	1.788				0.516	0.521	0.322	0.42	1.012	0.476	0.393	0.512	1.07	0.292	0.712	1.72	1.12	0.52	0.62	1.4	1.09	1.07	1.67
	0.322		0.798	0.913	0.755	1.14	0.716	0.228	1.258	0.912	2.757	0.913	1.848	0.616	0.716	0.595	1.99	2.009				0.516	1.197	0.555	1.458	0.745	0.476	0.847	0.63	1.07	1.033	0.903	1.11	0.65	0.52	1.14	2.22	1.57	1.95	1.62
	0.457		0.47	1.013	0.847	0.918	0.865	1.333	1.002	1.164	1.424	1.008	1.548	0.942	0.949	1.056	1.683	1.103				1.231	0.505	0.837	0.525	0.453	0.781	0.995	0.63	2.092	0.361	0.993	1.49	0.93	0.52	1.02	1.62	1.12	1.79	1.82
	0.435		0.707	0.361	0.521	0.93	1.484	0.824	1.682	0.68	1.829	1.627	1.329	1.169	2.419	1.042	1.33	1.522				0.7	0.944	1.82	1.072	0.525	0.9	1.281	0.668	1.621	1.276	1.474	1.93	0.56	1.38	0.64	2.05	1.12	2.19	1.53
	0.504		0.785	0.537	0.929	0.504	1.209	0.981	1.575	0.432	2.606	0.752	0.683	0.479	0.936	0.944	0.968	1.457				0.514	0.968	0.51	0.798	0.292	2.725	1.284	0.668	1.666	1.369	0.593	0.65	1.1	0.34	1.42	1.02	1.59	1.69	2.01
	0.304		0.258	1.241	0.266	0.824	0.692	0.552	1.582	0.513	2.562	1.449	2.969	1.658	2.477	1.88	1.564	2.031				0.606	0.501	0.322	0.809	1.01	1.264	1.374	0.326	0.784	0.721	1.785	1.22	1.38	1.06	0.74	1.02	1.41	1.64	1.91
	0.477		0.689	0.593	0.349	0.852	1.276	0.798	1.118	1.379	1.084	0.742	0.968	0.68	1.665	1.893	1.082	2.05				0.959	1.441	1.209	1.226	1.008	1.204	0.769	2.375	0.784	0.645	0.584	1.6	0.74	1.32	0.74	1.55	1.84	1.81	1.63
	0.898		0.204	0.777	0.922	0.91	0.462	0.355	0.78	1.102	2.224	1.359	1.259	1.072	1.76	1.04	1.532	1.216				0.46	0.775	0.548	1.04	0.488	1.338	0.783	2.041	0.784	0.292	0.841	0.81	0.74	2.22	0.74	1.15	1.64	1.74	1.68
	0.396		0.392	0.665	0.589	0.563	0.982	0.456	0.78	0.68	0.634	0.966	1.297	1.271	1.078	0.917	1.33	1.521				0.995	0.324	1.098	0.987	1.326	3.362	1.208	1.866		0.841	0.797	0.67	0.74	1.14	1.22	2.15	1.24	1.44	1.41
	0.47		1.228	1.04	0.589	1.039	0.347	0.871	0.52	0.658	0.968	1.428	1.553	0.433	0.791	1.33	1.133	1.428				0.755	0.806	0.658	0.47	1.163	1.214	0.943	0.453		1.756	0.652	0.35	0.54	1.11	1.06	1.9	1.47	1.92	1.01
	0.645		1.056	1.256	0.78	0.68	0.626	1.33	0.822	0.789	0.937	1.082	0.923	0.935	1.752	1.461	1.367	1.004				0.76	0.981	1.259	1.177	1.112		0.88	0.453		0.64	1.065	0.51	0.74	1.04	1.06	1.65	0.5	1.16	1.01
	0.637		0.413	1.074	0.704	1.189	0.439	0.953	1.44	0.67	2.198	0.529	2.064	1.387	1.688	2.085	0.413	1.056				0.921	0.26	1.226	0.613	0.841		1.161	1.231		0.324	0.534	0.51	0.91	2.17	1.08	0.74	1.2	2.53	2.06
	0.381		0.602	0.517	0.777	0.563	0.798	0.71	1.163	0.99	1.841	1.305	1.088	1.3	1.87	1.012	1.129	1				0.634	0.671	0.949	0.962	0.742		0.769	1.665		0.361	1.028	1.03	0.97	1.17	0.52	0.74	1.2	1.88	2.24
	0.336		0.981	1.11	0.673	0.563	0.728	0.707	0.887	0.34	1.3	0.377	4.146	0.71	0.721	0.847	0.94	1.659				0.634	0.517	0.987	0.942	1.002		0.769	0.405		0.837	0.981	0.48	0.67	1.41	1.7	1.52	1.82	2.56	1.48
	0.483		1.316	0.665	0.94	0.662	0.871	1.457	0.981	1.206	1.599	0.388	1.234	0.801	1.33	1.372	1.55	1.777				0.737	0.419	0.64	0.304	1.258		1.159	3.445		0.753	0.837	0.48	1.32	1.54	0.67	1.52	1.52	1.32	1.6
	0.476		0.577	0.97	1.012	0.62	0.865	0.419	1.648	0.473	0.636	0.525	1.066	1.487	0.759	1.355	1.211	1.965				0.521	0.361	1.012	1.593	0.453		0.514	0.607		0.614	0.563	0.77	0.52	0.5	1.2	2.18	1.71	2.62	1.59
	0.837		0.246	0.981	1.098	0.735	1.141	0.68	1.064	0.259	0.857	1.628	1.92	0.392	0.981	0.937	2.19	1.414				0.521	0.188	1.161	0.549	0.292		0.514	1.548		0.775	0.551	1.18	0.85	0.77	1.48	1.33	0.87	1.26	1.59
	0.37		0.797	0.451	0.361	0.797	1.068	1.402	1.212	0.381	0.448	0.852	2.258	1.791	2.116	1.599	2.593	1.76				0.921	0.525	0.753	0.574	0.602		0.94	2.435		1.241	1.254	1.47	0.94	1.5	0.96	1.64	0.87	2.02	2.28
	0.404		0.537	0.399	0.525	0.648	0.809	0.424	0.996	1.471	2.277	0.817	1.618	1.673	1.638	0.612	1.593	1.424				0.556	1.082	0.917	0.817	0.658		0.405	1.262		0.844	0.841	1.01	0.71	1.94	0.96	1.73	1.73	2.09	1
	0.441		0.857	0.388	0.595	0.356	0.329	0.563	0.827	0.835	2.163	0.935	1.737	1.05	1.542	1.624	1.88	0.68				1.451	0.935	0.949	0.935	0.324		1.409	1.262		0.892	1.156	0.8	1.29	0.92	1.28	1.83	1.23	1.99	1.62
	0.383		0.806	0.246	0.266	1.256	1.583	1.053	0.894	0.688	1.916	1.154	2.265	1.029	1.155	1.635	1.778	1.296				0.755	1.082	1.065	0.42	0.69		1.641	3.21		0.392	0.735	0.83	1.03	0.62	0.87	2.05	1.31	1.22	1.08
	0.347		0.712	0.581	0.434	0.246	0.306	0.376	1.05	1.171	0.616	0.686	2.429	0.94	1.948	0.981	1.197	1.489				0.727	0.485	1.056	2.04	0.69		1.054	1.139		1.333	0.643	0.78	0.89	0.94	1.06	1.82	1.96	1.22	1.08
	0.432		0.678	0.476	1.013	0.491	0.329	0.552	0.408	0.212	1.458	0.613	2.172	1.186	2.167	1.89	1.806	1.597				0.815	0.777	0.549	0.517	0.196		1.054	0.773		0.419	0.52	0.78	1.15	0.91	0.95	1.64	1.36	1.27	1.74
	0.381		0.745	0.913	1.103	1.204	0.521	0.993	1.271	0.334	2.561	1.186	2.084	0.985	3.144	1.372	0.981	1.118				0.784	0.854	0.797	0.634	0.742		0.63	0.773		0.434	0.937	0.96	1.37	0.16	1.19	2.07	2.08	1.23	2.25
	0.381		0.577	1.001	0.547	1.163	1.161	1.748	0.434	1.517	1.665	0.304	1.914	0.462	1.428	1.93	2.181	1.096				0.556	1.039	1.136	1.356	1		0.937	1.605		0.58	0.968	0.84	1.06	1.53	1.46	1.12	1.43	1.13	2.14
	1.003		0.292	0.636	0.517	1.14	0.832	1.239	0.493	0.599	1.948	1.264	1.058	0.658	2.167	1.916	0.742	0.781				1.06	0.745	0.387	1.419	0.343		0.905	0.73		0.909	1.14	1.04	1.1	1.23	1.54	1.12	0.66	1.13	1.2
	0.507		0.413	0.913	1.193	1.39	0.908	0.581	1.056	0.955	0.837	1.264	1.549	0.868	1.129	0.968	1.122	1.583				0.937	0.479	0.343	1.226	0.935		1.28	0.659		0.959	0.852	0.32	1.01	0.47	0.48	1.85	0.66	0.93	1.88
	0.607		0.26	0.937	0.812	0.957	0.756	0.434	0.485	0.347	0.88	0.479	0.847	1.118	2.181	1.501	1.643	1.98				0.572	0.574	0.62	1.653	1.807		1.07	0.59		1.145	0.714	1.44	0.91	1.23	0.48	1.85	0.66	1.62	1.88
	0.406		0.521	1.125	0.731	0.413	0.652	0.505	0.97	0.847	1.451	0.52	1.066	1.359	1.209	1.393	0.809	1.252				0.572	1.173	0.394	1.065	1.172		1.418	0.91		0.753	0.873	1.23	0.69	0.98	0.88	1.44	0.92	1.83	1.27
	1.304		0.548	0.58	1.165	1.226	2.058	0.453	0.592	1.156	2.041	0.29	1.065	1.542	1.551	1.492	1.935	1.355				0.572	1.154	0.541	0.897	0.246		0.365	2.875		0.581	1.4	1.37	0.9	1	0.85	0.71	1.66	1.15	1.27
	0.499		0.266	0.868	0.252	1.033	1.518	0.368	1.013	1.445	1.729	1.296	1.725	1.197	1.163	1.56	1.061	0.636				0.769	0.491	1.101	1.104	0.695		0.365	0.854		1.229	0.904	1	0.16	0.75	0.75	0.71	1.71	1.07	0.9
	0.518		0.388	0.376	0.43	0.476	0.551	0.957	0.501	1.032	1.734	1.066	0.996	1.169	1.529	1.161	1.94	1.316				0.724	1.072	0.484	0.798	0.419		0.828	1.86		0.894	1.14	1.18	0.16	1.48	1.02	1.58	2.01	1.69	1.98
	0.499		1.879	0.981	0.982	0.861	0.837	0.785	0.844	1.158	2.456	0.266	1.836	1.061	1.4	0.937	1.784	1.98				0.706	0.616	0.356	0.904	0.532		0.556	0.373		0.824	0.62	1.14	0.16	0.49	1.56	1.87	2.17	1.45	1.25
	0.52		0.434	0.433	0.904	1.271	0.935	0.62	0.665	0.415	1.091	0.767	1.896	1.04	1.688	1.316	1.037	2.009				0.706	0.797	0.923	0.551	0.959		0.556	1.168		0.488	0.424	1.03	0.66	0.41	0.94	1.54	1.45	1.17	1.04
	0.435		0.775	1.454	0.753	1.426	1.112	0.981	1.413	0.279	1.89	0.731	0.848	1.417	0.93	2.267	1.189	1.548				0.498	1.097	1.194	0.848	1.14		0.824	1.101		1.141	0.47	0.26	0.48	1.42	0.92	1.23	1.28	2.56	2.71
	0.559		0.484	0.851	0.924	0.861	1.064	0.904	0.564	0.851	1.419	0.228	1.743	1.361	1.288	1.892	1.428	1.229				0.888	1.29	0.665	0.931	1.291		1.379	1.026			0.957	0.78	1.07	0.73	1.14	1.65	1.23	1.48	1.92
	0.395		0.981	0.731	1.245	0.949	1.487	0.532	1.04	0.856	1.214	1.521	1.848	0.564	1.816	1.189	1.11	1.415				0.936	0.756	0.775	0.479	1.118		0.905	4.364			0.981	0.81	1.19	1.56	0.92	1.46	0.57	1.57	1.01
	0.262		0.837	0.571	0.725	0.6	0.827	0.52	1.217	0.404	0.665	0.745	1.198	1.94	1.528	1.521	1.11	1.714				1.138	0.368	0.653	0.52	2.102		0.727	3.469			0.837	1.2	0.82	1.06	1.04	0.52	2.01	0.92	1.01
	0.337		0.931	0.791	0.645	0.52	0.88	0.41	0.678	0.779	0.775	0.981	2.288	0.623	0.987	1.924	1.905	1.712				0.996	1.228	1.128	0.75	1.451		1.403	0.916			1.002	1.23	0.78	1.27	0.46	1.25	0.84	2.67	1.01
	0.716		0.712	0.322	0.449	0.51	0.52	0.465	0.728	0.616	1.947	0.677	1.778	0.349	0.252	0.93	0.847	1.612				0.828	1.076	0.75	1.091	0.89		0.569	0.832			0.94	0.79	0.84	1.4	0.46	0.61	1.46	2.04	1.85
	0.35		1.078	1.01	1.413	0.983	0.52	1.161	0.462	0.381	1.601	0.791	0.73	0.589	1.653	0.448	1.683	0.868				1.546	0.987	0.75	0.505	0.484		1.08	0.832			0.616	0.44	0.64	1.63	1	2.12	0.58	1.56	1.24
	0.624		0.839	1.487	1.209	0.69	0.571	0.839	1.809	0.491	1.486	1.056	1.628	0.877	1.781	1.072	1.101	2.019				0.695	0.563		0.707	1.004		0.828	0.59			1.144	1.04	0.61	1.53	1.6	0.76	1.86	0.88	2.09
	0.483		0.29	1.026	0.929	0.769	1.269	0.29	0.51	0.851	0.806	1.268	1.29	0.953	1.809	1.356	2.302	0.593				1.231	1.133		0.439	0.908		1.493	0.834			0.525	1.04	0.8	1.23	0.71	0.76	1.94	2.53	1.1
	0.431		0.924	0.877	0.399	1.259	1.082	0.924	0.6	0.235	0.453	1.056	0.664	0.574	1.512	1.013	0.976	2.554				0.71	0.68		1.5	1.097		1.298	0.834			0.456	0.62	1.21	1.05	1.61	1.26	1.55	1.89	1.78
	0.534		1.126	0.671	0.349	0.871	1.454	1.126	0.671	0.73	1.521	1.012	0.623	1.241	1.677	1.217	2.366	2.183				1.054	1.144		1.441	0.361		0.498	0.834			1.041	0.29	0.9	0.68	1.46	2.37	0.82	2.54	1.89
	0.411		1.088	1.388	0.966	0.955	0.653	1.088	0.877	1.189	0.848	1.318	0.698	1.771	2.183	1.968	1.128	2.463				0.9	1.103		1.241	1.516		0.498	1.925			0.404	1.1	1.45	0.78	1.12	1.62	1.31	1.46	2.1
	0.435		0.737	0.581	0.756	0.755	1.156	0.737	1.076	1.245	1.103	0.958	1.76	1.408	1.607	1.419	1.88	1.743				0.73	0.989		1.208	1.041		1.368	1.548			0.662	1.98	0.48	1.68	1.38	1.95	1.5	1.98	2.04
	0.353		0.993	0.504	1.224	1.068	2.08	0.993	1.151	0.886	1.566	1.119	2.328	0.678	1.71	1.677	1.816	1.267				1.565	0.42		0.78	1.658		1.207	2.453			0.304	1.69	0.69	1.14	1.18	1.52	1	1.07	1.58
			0.868	1.158	0.949	0.742	0.779	0.868	0.857	1.032	1.538	1.02	1.734	1.198	1.341	1.757	1.604	1.31				0.634	0.801		1.333	1.227		1.3	1.236			0.194	0.65	0.8	0.81	0.78	1.68	1.17	1.71	0.7
			0.347	0.881	0.9	1.068	1.373	0.347	0.704	0.52	1.54	0.377	1.494	1.2	0.775	1.183	2.33	2.081				0.634	0.797		0.88	1.28		1.456	2.187			0.777	0.65	0.26	0.84	1.17	1.96	1.33	1.87	0.7
			0.769	1.316	0.983	0.448	0.756	0.769	1.096	0.708	0.529	1.161	2.02	1.336	1.252	2.019	1.987	1.258				0.634	0.571		0.917	0.451		0.706	0.326			1.446	1.02	0.26	1.3	0.91	0.82	1.82	2.42	1.9
			0.904	0.626	0.292	0.252	0.886	0.904	0.848	0.479	1.428	1.084	1.129	1.226	1.01	1.807	1.653	0.635				0.859			0.909	0.993		0.706	0.326			1.05	0.9	1.38	0.43	1.09	0.82	1.76	1.34	1.9
			0.532	0.433	1.662	0.678	0.936	0.532	0.555	0.595	0.939	1.586	1.306	1.306	2.04	1.71	1.152	1.768				1.026				1.098		1.161	0.326			0.868	0.84	0.45	0.43	1.13	0.82	1.88	1.34	1.72
			0.913	1.129	1.145	1.163	1.11	0.913	0.665	0.71	1.163	1			1.532	1.558	1.066	0.894				0.932				0.204		1.361	1.431			0.41	1.68	0.16	0.43	1.36	0.82	2.09	1.42	0.89
			0.608	0.908	0.394	1.03	1.271	0.608	0.616	0.725	1.053	0.775			1.563	1.557	1.491	1.194				0.916				0.365		0.384	2.057			0.479	0.55	0.16	1.48	1.35	1.2	1.81	1.42	0.89
			0.876	0.809	1.521	0.304	0.903	0.876	0.606	1.054	0.742	1.484			1.126	1.356	0.39	1.484				0.662				1.008		0.384	1.231			0.368	1.25	1.25	0.94	1.32	1.52	1.48	2.22	2.62
			0.635	0.781	0.571	0.42	1.148	0.635	0.806	0.839	1.697	0.616			1.872	1.245	0.753	1.461				0.352				1.136		0.384	1.869			0.847	1.13	0.73	0.96	0.42	1.52	1.14	0.88	1.11
			0.752	0.871	0.41	0.673	0.987	0.752	0.665	0.892	0.923	0.785			1.913	1.519	1.082	1.126				0.704				0.529		1.273	2.308			0.812	1.43	0.34	1	1.45	1.44	1.1	0.88	2.33
			1.102	1.03	0.626	0.349	1.018	1.102	1.265	0.73	1.184	1.236			0.949	2.252	1.155	1.208				0.824				0.228		1.573	0.643			0.698	1.24	0.34	1.23	0.65	1.65	1.16	0.88	1.46
			0.71	0.987	0.456	1.214	1.081	0.71	1.341	0.563	1.148	0.91			0.752	1.737	1.405	0.68				0.854				0.42		1.873	1.05			0.563	1.06	0.89	0.89	0.65	1.2	2.37	2.17	1.46
			0.94	0.71	0.88	0.394	0.602	0.94	1.152	0.332	1.039	1.284			1.918	1.618	1.066	1.013				0.611				1.2		1.042	0.994			0.226	1.11	0.76	0.2	0.65	1.15	1.31	1.68	1.52
			0.288	1.058	1.471	0.505	0.516	0.288	1.645	0.876	1.648	1.368			1.916	1.838	0.689	0.678				0.797				0.304		1.094	0.689			0.322	1.65	1.24	1.48	0.92	1.52	1.78	2.14	1.35
			0.75	1.378	0.377	1.385	0.645	0.75	1.02	0.557	0.908	1.098			1.186	1.615	0.806	0.785				1.038						1.889	0.689			0.649	0.92	0.78	1.81	0.92	1.42	1.64	2.3	1.47
			0.955	0.581	1.491	0.837	1.292	0.955	1.252	0.848	0.987	0.634			1.574	1.351	1.648	1.612				1.068						1.068	1.319			1.183	2.15	0.81	0.52	1.26	2.39	1.12	1.35	0.69
			0.953	0.871	0.39	1.297	1.205	0.953	1.355	0.626	0.537	0.686			2.081	1.532	1.437	1.44				1.355						0.954	0.345			0.752	1.13	0.4	1.43	1.37	0.78	1.07	1.67	0.69
			0.871	0.829	1.197	0.929	1.098	0.871	0.548	1.183	1.591	0.433			1.219	1.672	2.064	2.102				0.63						0.954	1.332			1.602	2.09	0.46	1.44	0.71	1.4	1.42	1.61	0.69
			1.128	0.847	0.616	0.39	1.264	1.128	1.069	0.491	1.63	1.368			0.207	1.619	2.151	0.488				0.63						1.444	0.861			0.931	1.04	0.78	1.47	1.07	1.26	1.63	1.12	1.79
			0.993	0.563	1.134	0.614	0.563	0.993	0.419	1.638	1.236	0.861			1.065	1.645	1.936	0.408				1.207						1.261	1.792			0.908	1.55	1.01	1.41	0.91	0.94	0.88	1.96	1.78
			1.42	0.332	0.904	1.14	1.31	1.42	1.004	1.245	0.735	0.68			0.549	1.695	2.195	1.341				0.454						1	0.462			0.985	1.24	0.96	1.39	1.06	2.14	1.13	2.58	1.74
			1.14	0.665	1.305	0.935	0.806	1.14	1.097	0.47	0.484	0.94			0.707	2.034	1.512	1.621				0.606						1	1.216			1.072	0.74	0.48	1.26	1.43	1.44	1.27	2.28	0.88
			1.069	0.453	0.684	0.787	0.465	1.069	0.388	0.297	1.11	1.235			1.354	1.968	1.556	1.829				0.58						1.222	2.116			1.623	1.5	1	1.39	1.12	1.6	1.17	1.69	1.31
			1.428	0.725	0.94	0.404	1.177	1.428	1.637	0.716	1.335	0.993			0.993	1.438	1.241	1.165				0.954						1.451	2.692			0.365	1.45	0.42	1.33	0.81	1.94	1.12	1.65	1.74
			0.332	0.868	0.433	0.838	1.346	0.332	1.001	0.532	1.316	0.966			0.537	1.977	0.937	1.532				0.87						1.336	1.498			0.658	0.85	0.48	1.68	0.97	0.96	0.9	2.33	0.48
			0.996	0.985	1.012	0.563	0.324	0.996	1.123	0.957	1.165	1.061			1.551	1.642	2.152	1.477				1.222						1.86	1.024			1.084	1.45	0.55	1.44	1.55	0.96	0.55	1.98	1.17
			1.047	0.557	1.098	0.492	0.716	1.047	0.677	1.047	1.058	1.114			1.586	1.935	0.484	1.329				0.916						1.088	0.462			1.189	1.02	1.48	0.46	1.08	1.54	2.33	0.58	0.74
			0.742	1	0.859	1.039	0.516	0.742	0.698	0.453	1.082	0.981			1.297	0.777	1.647	0.779				0.879						1.943	0.462			0.684	0.84	0.55	1.86	1.1	0.47	1.3	0.58	0.74
			0.612	0.653	0.824	0.737	0.608	0.612	0.329	0.785	1.647	0.985			1.348	1.613	1.437	1.387				0.879						1.547	0.692			0.876	1.03	0.79	1.57	0.98	1.75	1.25	1.77	0.3
			0.698	0.266	0.844	1.003	1.111	0.698	0.6	0.808	1.46	1.813			2.201	1.341	1.775	1.457				0.486						1.273	1.243			1.852	0.81	1.06	1.2	1.13	1.5	0.84	2.24	2.6
			0.937	0.456	0.809	0.912	1.065	0.937	1.065	1.326	2.08	0.887			1.234	1.76	0.955	0.881				0.486						1.403	0.607			0.306	0.58	0.54	1.29	1.14	1.47	0.84	2.07	1.21
			0.376	0.449	0.935	0.775	0.593	0.376	0.695	0.742	1.893	1.259			0.737	1.607	0.737	1.305				0.486						1.07	0.607			0.692	1.34	0.78	1.55	1.3	1.85	1.14	1.38	1.1
			1.033	0.608	1.025	0.759	1.119	1.033	1.241	0.448	1.393	1.239			0.913	1.449	1.948	1.101				0.572						1.513	1.69			0.78	0.81	0.42	1.39	0.42	1.38	2.52	1.74	1.19
			1.369	0.972	1.01	0.814	0.547	1.369	0.71	0.704	1.347	0.613			1.487	1.326	1.623	1.566				0.469						0.879	0.749			0.94	1.07	0.68	1.46	0.42	0.92	1.42	3.13	1.41
			1.039	0.361	0.304	0.822	0.614	1.039	1	0.347	1.342	1.186			1.041	0.857	1.186	1.44				0.469						1.269	0.898			0.736	1.39	0.32	0.74	0.42	2.28	1.48	1.78	1.93
			1.002	0.6	0.962	0.844	0.376	1.002	0.94	0.775	2.161	1.269			0.413	1.212	0.557	1.48				1.237						0.954	3.093			1.065	0.68	0.45	1.73	0.89		1.96	2.32	1.56
			0.742	0.78	0.949	0.689	0.361	0.742	0.488	0.306	1.516	0.71			0.47	1.013	1.272	0.592				1.09						0.954	0.859			0.563	1.13	0.98	1.93	1.1		1.06	2.14	1.8
			1.226	0.47	0.716	1.084	0.608	1.226	0.394	0.458	0.982	0.785			1.61	1.51	1.71	1.642				0.794						1.481	3.464			0.71	1.16	0.46	1.45	1.83		1.53	1.54	1.71
				0.678		0.504			0.645	0.521	1.169	1.227			1.123	1.529	0.949	2.1				0.341						1.859	1.421			0.89	1.34	0.46	1.07	0.41		0.91	2.78	1.66
				1.041		1.053			0.673	0.347	1.766	0.791			1.583	1.72	2.077	1.3				0.341						1.604	2.112			1.385	1.6	0.46	1.14	0.41		1.71	1.02	1.27
				0.493		1.359			0.886	0.226	1.857	0.368			1.845	1.371	1.163	2.292				1.12						0.653	2.662			0.564	0.92	1.46	1.14	1.44		1.65	1.95	1.29
				0.439		1.484			0.806	0.829	1.974	0.801			1.081	1.2	1.361	0.43				1.608						0.653	1.034			0.905	1.38	1	0.83	1.03		1.43	1.39	0.96
						0.981			1.152	0.707	1.583	0.349			2.031	1.234	1.529	1.38				1.145						0.653	1.034			0.521	1.72	1	0.83	1.14		1.54	1.21	1.28
						0.979			0.355	0.324	1.002	0.504			2.26	1.056	1.503	0.918				0.54						1.213	1.214			0.626	1.55	0.62	1.28	1.36		1.96	2.01	1.59
						0.616			0.368	0.324	1.393	0.798			0.826	1.743	0.886	1.968				0.54						1.329	0.962			1.002		0.77	0.9			1.55	2.11	1.49
						0.6			0.388	0.387	1.034	0.606			1.045	1.284	1.084	1.852				0.471						0.746	0.962			1.214		1.05	0.92			1.27	0.84	0.88
						1.396			0.94	1.252	1.405	1.385			1.592	1.714	1.174	2.221				0.471						0.746	1.154			0.581		1	0.55			1.16	0.84	1.94
						1.028			0.361	0.68	0.97	0.581			2.012	1.42	1.685	0.716				0.967						1.149	2.576			0.394		1.28	1.05			0.71	0.84	1.08
						0.306			1.224	0.592	1.012	1.725			1.582	1.588	1.096	2.005				1.183						0.528	3.178			0.704		0.83	2.08			0.71	2.33	2.2
						0.39			1.047	1.174	0.725	0.479			1.102	0.908	1.252	0.462				0.486						1.456	2.235			0.6		1.1	1.67			0.71	1.88	1.02
									0.94	0.276	2.072	0.857			1.966	1.217	0.807	2.937				0.599						1.325	0.466			0.608		1.06	1.23			1.73	2.02	1.13
									1.276	1.102	0.646	1.539			1.344	1.004	1.302	1.37				0.422						0.88	0.466			1.113		0.99	1.78			2.04	2.5	1.17
									0.832	0.589	1.065	0.505			0.557	1.778	0.912	1.284				1.068						0.88	0.466			0.557		0.69	1.76			1.32	1.45	1.48
									0.712	0.606	1.724	1.501			1.003	1.371	0.476	1.871				1.633						0.664	0.58			0.759		1.35	0.88			1.94	2.19
									0.908	0.985	0.602	0.332			1.197	1.556	1.156	0.752				1.3						1.918	1.368			0.589		1.22	0.8			1.36	1.63
									0.886	0.785	1.056				1.118	1.136	1.163	0.937				0.365						2.098	2.294			1.02		0.36	1.07			1.55	1.42
									0.368	0.439	1.839				1.101	1.145	0.277	1.918				0.864						1.214	0.975			0.822		0.32	1.1			1.87	1.42
									0.696	0.721	2.224				1.2	0.161	1.587	2.08				0.944						1.214	2.65			0.904		1.28	1.35			2.01	1.47
									0.996	0.52	1.961				1.737	2.051	1.672	0.981				0.42						0.594				0.881		1.13	0.85			2.16	1.32
									0.593	1.316	1.204				0.485	1.298	1.482	0.806				0.853						0.594				0.968		0.65	0.94			1.87	1.07
									1.212	1.004	1.169				1.48	0.698	1.692	1.338				0.651						1.149				0.917		0.69	1.45			1.26	1.92
									1.945	0.537	2.011				0.424	1.395	1.501	1.112				0.745						1.207				1.173		0.35	1.16			2.02	1.82
									1.323	0.376	2.673				1.05	1.88	1.48	1.264				0.745						1.24				0.479		0.35	1.5			1.35	1.43
									1.551	0.665	1.845				0.557	1.46	0.704	1.156				1.414										0.759		1.31	1.16			1.66	2.06
									0.923	0.785	1.784				1.576	1.466	1.328	0.981				0.967										0.767		1.17	0.99			1.92	0.87
									1.294	0.377	0.665				0.785	1.607	1.873	1.088				0.606										0.462		1.19	1.71			1.65	0.87
									0.761	0.228	1.004				1.774	1.596	1.197	0.785														0.485		1.46	1.8			1.47	1.49
									0.826	0.456					1.612	1.93	1.096	1.347														0.439		1.08	0.97			0.54	2.24
									1.677	0.343					1.533	1.428	0.551	0.453														0.808		1.1	1.32			2.55	1.92
									0.966	0.322					0.898	1.529	0.704	1.529														1.095		1.1	0.94			2.06	1.23
									0.505	0.451					1.533	0.476	0.6	0.797														0.439		1	0.9			1.38	1.23
									0.731	0.671					0.798	0.517	1.789	0.43														0.736		0.52	0.42			1.23	1.46
									0.957	0.931					2.342	1.193	2.034	2.367														0.761		0.52	0.61			2.11	1.2
									1.766	0.439					1.387	0.847	0.712	1.529														0.962		1.01	1.06			1.92	2.17
									0.501	0.394					2.484	1.428	1.851	1.254														0.94		1.15	1.48			2.46	1.28
									1.43	0.361					3.248	1.214	1.38	2.135														0.755		0.77	1.15			1.04	1.67
									1.17	0.322					1.396	0.868	1.336	0.993														0.822			1.2			2.19	1.1
									0.414	1.097					2.958	1.471	2.062	0.981														0.841			1.55			2.14	1.02
									1.344	0.775					2	0.897	1.226	1.942														0.917			0.48			1.66	1.39
									1.455	0.801					1.256	1.069	1.367	2.138														1.034						0.91	2.1
									1.293	0.458					1.839	1.2	0.91	0.808														0.377						1.33	1.23
									1.403	0.873					1.341	0.981	0.684	0.873														0.838						1.2	1.4
									1.4	0.337					0.824	1.648	1.662	1.462														0.761						1.76	0.78
									1.475	0.564					1.588	1.271	0.577	1.385														0.937						1.93	1.49
									1.99	0.684					1.3	1.234	1.897	1.322														0.716						1.77	1.45
									1.061	1.04					1.28	0.851	1.289	1.033														0.791						1.69	2.21
									1.054	0.861					1.752	1.621	1.564	0.887														0.387						1.84	2.02
									1.292	0.725					2.007	1.097	1.458	1.081														1.084						1.81	1.75
									2.25	0.646					1.198	1.485	1.073	1.221														0.521						1.55	0.81
									0.501	0.365					1.104	1.693	1.328	2.284														0.635						1.84	0.81
									0.788	0.537					1.662	1.279	1.341	1.441																				1.95	1.48
									0.943	1.189					1.768	1.635	0.484	0.829																				1.38	1.48
									1.11	1.208					1.488	1.426	1.556	1.047																				1.6	1.73
									1.108	1.172					0.678	1.104	1.676	1.496																				1.71	1.55
									0.952	0.493					0.529	0.886	1.101	0.937																				1.36	1.61
									1.22	0.886					1.551	0.756	1.181	2.226																				2.02	1.75
									0.754	1.14					1.11		0.753	0.89																				1.49	1.73
									0.836	0.775					2.528		0.949	1.259																				2.11	1.11
									1.206	0.62					1.952		1.028	1.082																				1.44	1.26
									1.779	0.704					2.292		1.039	1.792																				1.33	1
									1.309	0.636					1.431		0.721	1.897																				1.28	0.56
									1.341	0.491					1.516		1.35	1.112																				1.24	1.56
									2.5	0.332					1.776		2.197	1.458																				2.52	1.69
									0.806	0.735					1.004		1.804	1.467																				1.69	2.01
									1.312	0.696					1.039		1.727	1																				1.6	1.48
									0.838	0.577					1.231		0.94	0.912																				1.67	1.58
									0.989	0.505					1.942		0.868	1.725																				1.73	0.74
									1.212	0.233					0.958		0.551	1.193																				2.19	1.81
									1.292	0.922					0.555		0.742	1.688																				2.16	1.16
									1.261	0.332					1.638		1.235	1.288																				1.21	0.84
									1.568	0.64					1.861		0.584	1.323																				1.21	0.84
									1.35	1.532					1.049		0.39	1.184																				2.23	1.29
									0.751	0.787					1.582		0.886	1.341																				2.12	2.05
									0.918	0.877					1.816		1.754	1.205																				1.56	1.35
									1.387	1.125					1.737		0.571	1.66																				2.3	0.94
									0.712	1.01					1.452		1.095	1.816																				1.56	1.29
									0.95	1.026					0.73		0.649	1.494																				1.64	1.76
									0.375	0.42					0.689		1.033	1.372																				1.63	1.27
									0.904	0.462					1.364		0.93	1.05																				1.45	1.65
									1.002	0.549							1.431	1.46																				1.9	0.49
									1.374	0.996							1.553	1.974																				1.85	0.84
									0.943	0.368							1.688	0.456																				1.21	1.73
									1.05	0.258							1.588	0.458																				1.61	1.34
									1.694	0.288							1.848	1.388																				1.23	2.02
									1.057	0.343							0.696	1.748																				1.87	0.53
									1.203	1.388							1.807	1.341																				1.96	0.53
									1.493	0.577							1.329	0.755																				0.82	1.15
									0.966	0.838							0.908	0.78																				2.34	2
									0.712	0.563							1.444	1.047																				1.82	1.08
									1.14	0.867							1.19	0.908																				1.3	0.95
									0.944	0.775							0.981	0.987																				1.95	0.95
									1.35	0.361							1.101	1.729																				2.07	2.38
									0.779	0.678							0.935	0.332																				1.84
									1.299	0.368							1.387	1.209																				1.07
									0.748	0.451							1.001	1.297																				1.07
									1.933	0.775							1.258	2.021																				1.62
									0.826	0.777							1.101	1.169																				2.19
									1.206	0.695							1.155	1.082																				1.72
									2.1	0.959							1.593	0.571																				2.07
									0.843	0.297							1.441	0.608																				1.75
									1.292	0.684							0.797	1.278																				1.52
									1.042	0.847							0.97	1.442																				1.16
									1.119	0.377							1.096	0.394																				1.16
									1.048	0.826							2.11	1.305																				1.45
									1.507	0.479							1.246	1.008																				1.75
									1.894	1.131							0.433	1.665																				1.64
									1.152	0.43							1.096	1.128																				2.45
									1.025	1.156							1.875	2.235																				1.21
									1.125	1.413							0.841	0.529																				2.31
									0.615	0.871							1.297	1.388																				2.08
									1.697	0.708								0.949																				0.64
									0.447	0.614								2.458																				1.31
									1.481	0.196								1.378																				0.97
									1.635	0.636								1.643																				1.87
									1.868	0.936								0.525																				1.39
									0.992	0.635								1.477																				2.15
									1.472	1.045								1.957																				1.85
									1.491	0.73								1.298																				1.13
									1.628	0.735								1.499																				1.13
									0.97	1.05								1.194																				2.06
									1.496	0.756								1.805																				1.46
									1.081	0.502								1.492																				2.04
									1.537	1.329								1.55																				1.81
									0.905	0.356								0.917																				1.61
									2.384	0.962								1.621																				1.38
									1.4	1.129								1.294																				1.26
										0.838								0.791																				1.44
										0.752																												1.8
										0.292																												1.33
										0.692																												2.83
										1.396																												2.14
										1.216																												1.81
										0.949																												1.94
										0.793																												1.8
										0.897																												1.67
										1.189																												1.67
										1.448																												1.77
										1.075																												1.84
										1.205																												1.42
										1.25
										0.24
										1.158
										0.781
										1.143
										0.32
										1.23
										0.943
										1.061
										0.322
										0.28
										1.095
										1.161
										0.791
										1.008
										0.322
										1.071
										0.925
										1.206
										0.503
										1.596
										0.907
										1.619
										1.314
										1.13
										1.407
										1.115
										1.106
										0.639
										0.52
