# Supplementary material for: A stable microtubule bundle formed through an orchestrated multistep process controls quiescence exit
Source: eLife. 2024 Mar 25;12:RP89958. doi: 10.7554/eLife.89958 (PMC10963028; doi:10.7554/eLife.89958)
Supplement: Figure 1—source data 2. [file elife-89958-fig1-data2.xlsx]

## Sheet: Feuil1
		Phase I (7h)																								Phase I (7h) +noc
	length (µm)	1	2	3	4	5	6	7	8	9	10	11	12	13	14	15	16	17	18	19	20	21	22	mean		1	2	3	4	5	6	7	8	9	10	11	12	13	14	15	16	17	18	19	20	21	22	23	24
n=	0	-10	80			51																		40.3333	n=
22	0.129	-61	141		-33	41			22			47	-62				-48							5.875	32
	0.258	-18	195	57	95	7			-40	-10		85	-39	-50			-62			-6				17.8333							-8						-63		33						94		98
	0.387	160	183	126	-58	162			15	34	57	74	2	86	78		-76	-14	0	213	74	45		64.5		30	42	96			23	40	-17				23	116	80	30					114		39		23
	0.516	80	155	75	97	103		-74	89	93	67	15	111	59	43	125	62	48	70	143	85	36	80.461	74.4029		69	25	119	79	98	28	114	114	121	139	81	71	146	73	61	156	54	145	168	108	46	65	99	89
	0.645	200	252	274	57	209	290	180	206	185	195	271	184	350	201	242	159	135	185	293	530	222	241.917	230.087		245	137	476	140	161	117	167	247	341	189	284	123	360	271	137	387	170	193	273	263	163	186	199	303
	0.774	414	451	294	408	320	610	583	141	429	290	696	515	485	532	298	410	231	242	361	624	216	718.469	421.294		377	212	1105	287	401	152	403	469	539	276	499	150	398	304	207	612	380	432	331	559	311	282	221	321
	0.903	617	424	452	458	224	686	1006	306	659	563	615	879	437	778	501	547	444	277	354	578	437	760.884	545.586		397	297	1433	418	484	227	533	695	614	314	450	272	346	507	550	636	483	604	517	656	341	184	283	248
	1.032	1120	473	322	709	266	846	1061	160	670	689	575	956	491	1006	527	605	585	350	416	832	528	711.996	631.773		256	346	1848	619	463	242	363	748	563	396	288	173	334	504	746	866	519	697	464	488	251	291	395	232
	1.161	992	418	327	775	157	965	962	137	789	818	672	782	362	1120	661	377	547	378	428	595	620	608.986	613.227		268	352	1483	717	519	299	338	686	640	514	269	148	446	547	759	939	784	662	531	812	284	230	231	240
	1.29	1067	407	334	551	192	950	910	235	862	648	588	832	344	1059	641	420	323	301	594	619	443	528.537	584.024		246	293	1406	465	432	277	341	709	591	465	264	126	647	517	734	932	609	789	353	696	203	435	263	201
	1.419	1006	391	221	795	156	823	926	189	786	671	458	803	317	976	792	349	227	319	452	523	725	519.202	564.736		168	288	1309	367	382	316	300	553	547	402	307	184	617	374	864	967	565	779	399	747	166	327	375	225
	1.548	905	415	241	710	366	692	819	133	759	701	321	752	326	789	866	313	353	273	193	402	859	457.124	529.324		168	341	1391	422	259	295	326	524	447	357	325	263	571	324	735	1163	738	498	376	792	175	347	337	41
	1.677	752	286	52	573	367	620	538	98	606	476	202	585	395	626	879	378	201	166	249	133	1071	429.265	440.103		72	347	1054	399	258	135	104	516	454	253	263	157	398	272	661	1016	645	266	466	448	129	249		58
	1.806	587	215	15	481	274	701	390	11	343	504	255	470	247	579	738	315	151	90	189	0	904	345.745	354.761		69	308	1030	216	392	175	121	422	307	116	316	60	281	228	516	1025	371	78	496	320	92	163
	1.935	326	98		407	290	514	365	58	181	288	145	288	49	563	852	261	66	20	197	118	705	53.9312	278.33		104	311	592	136	174	117	117	251	253	175	291	58	478	226	345	1098	274		433	263		171
	2.064	168	2		304	440	272	188		145	36	146	176		470	573	173		72			596	119.12	242.507		160	234	268	116		70	-3	120	52	85	181		372	90	286	901	264		324			66
	2.193	126	0		16	166	194	66					42		183	248	97					174		119.273		115	199		58					77	0	117		363		75	641	147		199			112
	2.322	38	33			119	146	1							-10	303	195					192		113		87	35						38	101		27		24			360			157			42
	2.451	75				41	71								55	365						233		140		83	48						66					-28			176
	2.58					28	73								112	208						151		114.4			58
	2.709						45									89						166		100			59
	2.838															70								70
	2.967															55								55
	length (µm)	Phase II (26h)
		1	2	3	4	5	6	7	8	9	10	11	12	13	14	15	16	17	18	19	20	21	22	23	24	25	26	27	28	29	30	31	32	33	34	35	36	37	38	39	40	41	42	43	44	45	46	47	48
n=	0
61	0.129	146		215										118		251				0														175
	0.258	252		324							16			280		77				125			1											42		10
	0.387	185		152			2				96			390		0	36			94		460	131		212					102		6		27		0		56			381					421			4
	0.516	322	209	294	152	153	165	94	343	137	175	136	262	384	111	167	124	145	195	50	240	459	161	250	402	146	129	108	176	59	246	188	204	30	473	8	0	142	390	512	451	92	419	335	377	550	828	51	175
	0.645	648	483	276	266	319	377	136	789	336	341	463	705	582	299	317	527	218	309	138	589	903	445	548	315	388	573	408	250	372	494	423	350	408	854	579	203	217	622	771	820	351	595	739	637	792	1085	231	380
	0.774	1022	782	428	487	467	868	293	1286	532	369	600	941	845	356	381	915	572	404	299	1247	1423	684	1085	898	693	681	819	536	628	1094	463	619	1016	741	883	506	488	1043	1220	832	523	633	1142	1115	879	1301	387	1095
	0.903	1095	1145	641	364	842	869	660	1599	985	422	824	1176	804	412	373	1272	884	598	291	1461	1380	709	1508	1414	1003	690	1371	1208	897	1688	562	710	1243	1544	1220	862	609	1641	1587	1012	961	1100	915	1687	850	1166	551	1949
	1.032	1072	1516	665	697	1388	746	1037	2007	1712	444	1080	1283	966	529	448	1061	1180	811	194	1821	1174	1027	1204	2014	1375	642	1621	1766	1220	2054	600	816	743	2716	1154	836	808	2043	1608	1091	1516	1479	718	1579	715	1379	421	1983
	1.161	1224	1783	689	840	1564	656	1583	2361	2151	439	1376	1008	851	554	524	1280	1141	1163	249	1566	941	778	1177	2602	1699	526	1759	1883	1113	2180	650	880	577	2997	1100	852	954	2052	1548	1529	1426	1334	755	1790	791	1374	216	1970
	1.29	945	2061	623	1004	1432	576	1643	2182	2116	527	1195	1085	962	502	670	1232	1192	1090	132	1655	600	675	1203	2572	2172	579	1758	1963	831	1995	459	1012	624	2632	1205	796	1193	1814	1392	1259	1590	1462	579	1543	799	1757	279	2198
	1.419	895	1899	601	1004	1322	584	1555	1761	2112	504	1420	1128	616	472	781	1291	1072	1154	-97	1677	686	730	1143	2595	2153	607	1575	1376	1120	1934	479	1118	370	2311	1172	826	1179	1907	1076	1419	1550	1191	430	1537	721	1340	420	2089
	1.548	764	1517	768	985	1184	531	1531	1642	1917	445	1217	834	627	735	871	1435	950	1136		1952	589	616	1131	2542	2133	598	1532	1606	884	1921	263	988	161	2170	782	737	1022	2039	1043	1348	1647	1047	426	1524	503	1335	226	1970
	1.677	591	1466	600	1076	1016	620	1274	1502	1533	505	1509	550	546	743	865	1152	889	959		1619	335	465	867	2133	1920	631	1158	1650	911	1725	203	793	331	1795	815	516	953	1955	764	1428	1686	935	96	1441	427	1399	304	1640
	1.806	247	1203	517	1132	985	291	1047	994	1007	481	1524	126	392	591	696	1058	745	990		1596	317	693	589	1262	858	508	881	1404	767	1479	238	802		1413	798	384	864	1835	699	1610	1354	749		1328	423	1208	161	1365
	1.935	29	1096	370	1012	806	305	823	895	667	580	1515	0	272	632	518	823	779	1010		1043	185	614	178	479	375	511	606	1172	676	1308	189	912		1184	522	297	698	1991	330	1442	1301	583		1293	384	1239		1270
	2.064	-2	805	377	740	578	175	638	915	321	645	1222	10	157	713	222	815	484	1060		701	1	376	101		107	439	199	1011	637	1328	87	749		564	313	326	266	1787	82	1367	1030	328		1218	152	942		817
	2.193	93	395	316	659	604	181	568	465	187	479	1011		70	508	252	824	409	928		252	2	117			0	393		520	517	1347	64	731		360	267	250	142	1736		1138				957	20	694		725
	2.322	32	237	197	529	493	42	477	295	87	479	492		137	558	140	541	361	557		197	8	12			0	220		240	387	981		654			287			1598		803				910		459		448
	2.451		92	236	425	450	117	441	255	6	331	213		49	513	144	502	290	452		112		0						231	292	752		648			160			1363		743				701		422		340
	2.58			284	199	350		480	268	130	414	0		0	405	99	181	249	265				126							199	569		422						1189		522				472		385		458
	2.709			168	443	294		469	330		197	15			208		86	175												139			228												342		351		429
	2.838			34	302	266		314	32		72				137																		119												314		339		418
	2.967				180	159		172	139		0				133																		164												132				293
	3.096				218			102			23				164																														249
	3.225				98						115																																		193
		Phase II (26h) +Noc
	length (µm)	1	2	3	4	5	6	7	8	9	10	11	12	13	14	15	16	17	18	19	20	21	22	23	24	25	26	27	28	29	30	31	32	33	34	35	36	37	38	39	40	41	42	43	44	45	46	47	48
n=	0										18
57	0.129										165												13
	0.258	65		19					55		71				-15		69						354		83					25							95												64
	0.387	15		69	84				15						184	53	43		14			37	313		134			89		97							77				180			67		107			116
	0.516	177	153	148	200	89	71	283	87	168	48	49	24	64	174	255	215	256	70	190	115	114	274	82	177	114	183	69	208	226	226	200	83	292	25	52	74	84	129	111	189	138	170	141	70	125	417	359	110
	0.645	320	228	328	398	272	426	591	265	453	155	251	359	421	351	569	495	549	467	625	381	349	388	425	557	584	540	344	797	301	431	321	237	683	287	361	337	272	339	303	351	278	807	486	367	360	1052	864	359
	0.774	435	539	620	940	844	1338	1131	463	967	230	859	917	1181	836	1144	1032	1101	632	1179	726	662	649	1024	876	1030	785	818	1370	567	996	444	359	1117	552	1166	1106	357	256	536	823	586	1260	528	1114	525	1630	1171	643
	0.903	278	765	611	1614	980	2227	1634	879	1301	211	933	1284	1615	1311	1421	1558	1683	920	1312	1250	1405	646	1520	800	1346	1240	1037	1991	535	1176	839	551	1511	1100	1849	1214	565	297	505	1462	1219	1476	682	1570	791	1557	1344	623
	1.032	441	748	625	2062	866	2385	1826	1244	1576	163	825	1289	1672	1344	1355	1454	1705	980	1583	1360	1759	878	1432	808	1166	1267	1111	1941	492	1189	828	1047	1440	1720	2246	1156	958	696	656	1848	1800	1438	804	2092	898	1568	1342	778
	1.161	593	1016	516	3100	1036	1915	1831	1124	1890	328	768	1165	1222	1386	1356	1215	1304	1213	1506	1173	2126	834	1267	965	1194	1267	988	1783	432	1202	1060	1344	1566	1802	2163	903	1069	897	746	2236	1979	1637	840	1780	663	1827	1260	610
	1.29	740	958	467	2473	941	1840	1685	871	1826	349	686	1126	1456	1429	1595	1139	1078	1154	1065	1356	2202	933	1119	848	1264	1097	890	1740	412	1142	922	989	1250	1734	2130	640	1199	988	656	2161	2167	1612	790	1906	445	1414	1175	575
	1.419	691	917	414	2621	760	1631	1405	787	1894	245	791	926	1333	1168	1276	1079	1051	1153	979	1303	1907	1109	983	673	1140	785	835	1703	322	1226	853	932	1074	1685	1601	469	1300	1031	520	2306	2098	1202	1004	1726	644	1273	1137	385
	1.548	537	920	366	2667	753	1504	1659	720	2014	318	679	665	1076	1247	860	637	902	1100	632	927	2150	1013	832	651	972	707	676	1135	161	1184	774	860	818	1680	1693	237	1356	719	564	1998	2101	1242	819	1306	475	1339	1235	159
	1.677	561	966	217	2061	528	1017	1605	634	1610	287	562	416	1096	789	631	513	698	1061	531	792	1795	612	793	517	934	510	701	745	103	890	563	842	706	1483	1606	192	1312	825	457	1679	1602	821	594	1366	419	1241	1123	124
	1.806	443	725	229	2102	284	447	1536	395	1564	164	338	371	821	810	372	293	698	973	297	661	1709	556	666	202	739	313	448	372	141	585	447	691	372	1466	1158	178	1317	529	478	1439	1422	441	586	1021	336	909	968	71
	1.935	373	567	176	1761	311	293	1195	370	1306		289	204	680	693	62	79	705	625	34	394	1474	273	595		508	227	442	94		275	278	490	250	1437	876	69	1318	407	273	1271	975	88	612	1079	300	744	935	89
	2.064	211	409	176	1440	146	-13	722	338	935		239	116	655	235		-59	569	209		255	1080	59	520		328	90	268	38		18	238	358	84	1357	549	142	1316	533	235	791	830	60	315	846	152	386	643
	2.193	73	283		977	52		302	281	519		133		384				199	67		134	653	99	366		91		186			-60	192	177	57	1229	168	172	1006	197	184	578	503		124	304	-100	70	417
	2.322	55	182						94	148				169				142			43	250		228									120	58	1230	121	135	703	98	71	330	365		-38	154		-2	231
	2.451		219																			6		209										94	1134			327	77			369						151
	2.58		40																			24		120										91	741			107	62
	2.709																																		471
	2.838																																		257
	2.967
		Phase III
	length (µm)	1	2	3	4	5	6	7	8	9	10	11	12	13	14	15	16	17	18	19	20	21	22	23	24	25	26	27	28	29	30	31	32	33	34	35	36	37	38	39	40	41	42	43	44	45	46	47	48
n=	0					142		216																							136		81		83
98	0.129					236		311										146									306				154		272		119			24
	0.258		187			267		373					131		402			158								104	410				41		235		78	96		71								31
	0.387	123	185	173	237	355	152	366	429	513	78	145	136	26	479	104	351	155	244	137	203	237	159	47	81	141	438	126	117	87	100	49	332	42	89	70	496	116	395		8					163			115
	0.516	339	266	311	408	441	334	527	772	993	255	564	360	177	597	537	467	220	515	405	339	591	426	190	146	329	586	303	302	297	219	514	273	446	196	269	943	241	774		118	112	86	67	313	186	402	302	21
	0.645	459	400	478	666	769	451	698	1217	1320	408	1188	617	461	706	814	774	505	729	493	632	1271	713	340	358	457	1130	510	536	747	225	798	472	805	357	308	1388	356	1210	933	608	256	535	315	765	380	914	581	273
	0.774	776	680	535	967	821	544	959	1873	1615	748	1477	684	847	860	932	1271	685	1074	614	619	1651	867	381	666	731	1433	700	950	1803	368	1386	533	865	553	390	1490	416	1812	1337	1269	527	831	595	1117	545	1251	1029	418
	0.903	1201	962	516	840	1068	745	1091	2428	1697	822	1659	819	1406	1127	1260	1525	847	1500	503	863	1658	910	442	957	883	1751	920	1218	2429	380	1552	409	864	676	491	1375	351	2171	1633	2120	747	1372	884	1315	1106	2012	1557	566
	1.032	1419	1362	412	739	964	707	1144	2506	1437	1018	1838	845	1506	1206	1554	1207	884	1549	361	1191	1253	1103	507	1379	881	1780	977	1185	2665	361	1462	482	664	909	410	1194	310	1922	1768	2211	1114	1819	974	1001	1337	2599	2569	870
	1.161	1475	1577	484	753	1148	817	1139	2467	1438	1059	1933	905	1386	1367	1677	1264	863	1463	305	1175	1178	1191	450	1583	842	1989	875	1353	2939	383	1318	396	879	957	549	915	331	1620	1496	2124	1122	2043	1017	1053	1084	2150	2520	783
	1.29	1664	1630	426	693	1152	985	1076	2401	1331	1062	1889	790	1646	1342	1573	1176	770	1202	420	1292	1014	1184	680	1434	727	1876	754	1313	2883	340	1152	296	992	879	389	859	419	1507	1582	2120	1010	2022	925	1156	1078	1941	2511	958
	1.419	1670	1439	379	698	1306	982	1027	2221	1241	1045	1818	809	1714	1121	1377	1065	728	1145	516	1125	772	1109	564	1417	456	2077	640	1294	2709	259	1093	269	1108	633	441	950	379	1404	1405	1947	984	1721	742	1521	1184	1539	2210	860
	1.548	1610	1288	283	676	1147	975	831	1703	1160	907	1795	640	1521	1120	1204	799	655	979	395	1088	770	955	474	1433	496	1767	587	1293	2830	243	877	315	954	557	307	762	436	1402	1397	1793	848	2197	693	1258	1155	1532	1663	677
	1.677	1525	1322	326	844	1073	1047	723	1514	1014	812	1653	708	1554	980	1026	595	531	940	391	841	703	1020	508	1172	641	1854	501	1079	2825	251	906	418	901	593	329	745	500	1214	1245	1802	810	1977	599	1325	1260	1356	1406	804
	1.806	1393	1153	225	612	1041	989	820	1287	1081	749	1551	498	1707	610	886	550	432	1010	247	744	592	1009	638	1057	481	1572	326	933	2566	231	759	390	958	449	291	619	504	1066	1231	1527	833	1273	644	1037	1219	1333	1264	761
	1.935	1278	956	150	760	977	883	739	1086	1007	440	1249	489	1679	643	767	439	319	862	163	602	491	918	539	873	351	1378	281	716	1995	330	805	319	777	360	216	529	391	906	1076	1414	708	1172	449	1101	1002	1142	1052	916
	2.064	948	923	47	693	770	753	640	930	830	189	907	325	1655	495	653	333	384	838	150	503	357	773	428	740	330	1067	289	479	1845	268	625	119	780	210	101	510	277	650	1115	1269	709	932	410	916	763	988	860	809
	2.193	816	726		789	556	508	689	717	909	75	717	321	1582	308	385	180	336	680	78	308	288	501	365	548	105	661	177	399	1572	50	568	132	573	18	128	505	126	412	791	1019	639	614	207	771	639	990	855	736
	2.322	747	537		667	509	280	638	656	636	0	564	204	1402	330	331	87	203	643	60	253	221	412	175	429	66	1371	189	355	1447	190	663	133	380			540	96	248	676	834	608		376	690	553	863	458	658
	2.451	529	349		661	409	93	511	440	559	100	310	184	1223	324	324	40	190	629		126	168	447	57	245	33		108	191	1208	117	591	90	118			559		150	496	627	424		245	772	92	764	359	409
	2.58	412	162		438	231	25	333		482	11	246	116	1009	204	239		180	468		123	109	403	38	181			12	190	967		537	36	109			495		152	498	470	339		163	524	-77	663	90	519
	2.709	339			269	137		376		218		125	169	745	282	192			443		98	73	384	21	118				78	707		423					301			428	338			211	354	-54	656	13	538
	2.838	200			237			375		113		88	102	653	292				322		89	23	252						101	468		358								383	231			166	243	79	630		284
	2.967	98			208			246		134		60	45	532	206				257		97	37	18						57	298		251								205	209			114	262		441		191
	3.096	154			178					106			57	383	64				271		113								51	182		191								65				152	197		127		18
	3.225				103								99	235					210		160		14							43														99	77		84		26
	3.354				86								12	144					142				31																					64	97				46
	3.483													59					134
	3.612
	3.741
	3.87
		Phase III +Noc
	length (µm)	1	2	3	4	5	6	7	8	9	10	11	12	13	14	15	16	17	18	19	20	21	22	23	24	25	26	27	28	29	30	31	32	33	34	35	36	37	38	39	40	41	42	43	44	45	46	47	48
n=	0												27		6								66					76
103	0.129						93	107					10		56					45		7	90					140		86		92
	0.258		55	53		1	104	85	43				42	21	58	14	29.0584		91	47		41	70	69				111		118		122		35	70		46
	0.387	156	107	155	158	172	179	186	165	109	68	99	139	158	51	88	136.579	142	124	87	68	143	96	131	188	362	217	174	114	171	76	123	88	110	77	45	40	188	125	156	39	9	34	41	114.88				372.621
	0.516	452	404	327	453	436	422	358	306	422	219	276	258	301	297	312	332	209	266	236	301	363	268	330	519	560	318	317	286	556	126	339	241	383	348	258	276	518	284	442	148	127	196	236	237.804				798.626
	0.645	704	1321	606	755	638	581	640	632	549	323	397	548	445	577	929	702	293	616	459	568	604	510	610	961	914	531	513	245	923	206	658	554	808	755	603	761	1125	636	948	354	420	594	649	699	899.263	1114.82	899.721	1265
	0.774	966	1634	701	1010	877	613	712	881	993	855	557	786	823	508	1543	1081	580	1261	767	1045	660	582	848	1823	1608	1096	478	466	1307	216	951	867	1638	1029	1033	1021	1409	505	1378	718	758	1373	868	1155	1500.36	1470.63	1522.11	1311
	0.903	985	1677	742	1132	946	679	1002	932	1039	1363	646	941	1101	477	1605	1167	1194	1654	793	1380	562	576	793	2510	2198	1308	393	623	1465	228	1155	925	2044	944	1225	1346	1448	509	1481	1200	694	1396	961	1577	2069	1575	2195	1350
	1.032	1181	1277	755	1042	1059	704	756	878	1112	1312	562	806	981	545	1604	974	1589	1978	853	1413	551	689	525	2460	2555	1177	376	997	1248	248	1260	1020	2519	1046	1118	1268	1612	656	1410	1558	667	1374	754	1565	1986	1321	2447	1452
	1.161	1117	1106	739	847	1171	846	849	981	1004	1041	681	707	814	612	1332	789	1700	1901	740	1537	569	726	332	2827	2524	1243	329	772	970	260	1119	1098	2107	965	1080	1104	1299	701	1242	1499	489	1292	772	1720	1891	1059	2563	1391
	1.29	1191	926	703	769	1258	684	728	875	1009	933	309	591	967	697	1157	722	1725	2102	698	1485	534	552	314	2928	2408	875	236	669	822	351	942	1026	2166	1129	1115	1182	1171	638	1163	1460	377	1270	511	1698	1928	1088	2629	1332
	1.419	1183	838	541	633	1282	669	622	843	642	862	200	567	888	710	910	518	1779	1922	606	1678	426	573	335	2828	2313	856	222	563	666	348	903	1150	1895	1053	1221	1208	1159	585	1056	1201	277	1183	581	1696	1854	998	1955	1173
	1.548	1285	721	490	436	1112	585	310	900	762	847	298	581	645	658	655	252	2024	2013	419	1435	253	714	245	2896	2112	727	167	365	465	419	774	1001	1948	958	1120	1113	883	561	928	1123	315	1081	351	1535	1659	936	1496	1174
	1.677	1275	715	596	373	1203	606	97	946	477	703	214	526	745	687	460	246	1972	1475	360	1548	303	627	141	2636	2079	675	252	404	529	452	657	1099	1610	1095	997	1047	699	381	742	1179	383	1136	372	1478	1735	919	1235	958
	1.806	1245	625	524	345	1005	385	69	972	544	576		554	711	736	151	200	1541	1212	411	1489	289	472	255	2227	1859	693	143	437	491	387	616	909	1545	908	906	1048	705	292	576	1208	367	978	418	1380	1300	836	848	873
	1.935	1191	336	342	225	812	263		909	413	385		428	465	555	56	128	1141	896	281	1351	265	408	220	2001	1498	505	63	281	603	293	562	972	1300	921	794	841	632	244	459	1097	310	936	182	1237	1141	798	550	860
	2.064	1048	314	237	172	750	127		869	534	315		347	272	496		126	761	799	169	1172	208	322	102	1596	1118	434		289	511	362	482	773	1009	849	655	577	524	222	240	950	256	824	141	1212	998	883	380
	2.193	1023	257	149	144	628			834	219	196		283		566		167	713	500	134	783	141	118	108	1178	878	393		160	321	256	430	669	666	825	573	539	507	233	36	755	313	679		1044	833	774	363
	2.322	863	172	65	58	513			747	149			129		439		170	567	295	6	651	96		175	927	717	383		91	342	69	431	560	362	927	583	544	327	247		439	329	615		1022	489	445
	2.451	840	86		30	395			541				146		509		241	522	135	37	371			134	702	548	313			263	83	276	464	422	664	577	425	269	221		152	235	576		1037	290
	2.58	588				322			274				124		473		195	319	71	105	181			77	452	387	132			144	72	128	323	365	686	489	295	284	201		54	131	480		1105	336
	2.709	496				187							52		329			252			92			28		248	84			48		77	225	280	581	296	269	156	166			59	324		1128	557
	2.838	303				92							5		154			159								143	79			48			136	281	391	177	94	149					322		1400	479
	2.967	243				77									127			119						136						48			111	204	192	113		95					252		1125	427
	3.096	98				35									41																			131	46			88					204		1133
	3.225																																												1131
	3.354																																												1071
	3.483																																												863
	3.612																																												820
[truncated: 56 more columns]
