# Supplementary material for: A stable microtubule bundle formed through an orchestrated multistep process controls quiescence exit
Source: eLife. 2024 Mar 25;12:RP89958. doi: 10.7554/eLife.89958 (PMC10963028; doi:10.7554/eLife.89958)
Supplement: Figure 1—source data 3. [file elife-89958-fig1-data3.xlsx]

## Sheet: full data length  int
	without Noc							with Noc
	Phase I		Phase II		Phase III			Phase I		Phase II		Phase III
	length	intensity	length	intensity	length	intensity		length	intensity	length	intensity	length	intensity
N=	41	41	63	63	100	100		35	35	59	59	100	100
Mean	1.08507	650.714	1.63059	1296.28	1.93207	1338.53		1.15357	548.629	1.21119	1285.39	1.86133	1382.94
SD	0.21851	288.111	0.478772	559.86	0.436864	595.925		0.214452	287.712	0.190171	523.413	0.387012	572.856
	1.11	1064.42	1.427	1130.15	1.911	1648.07		1.143	347.413	1.231	674.366	2.224	1268.48
	1.323	449.707	1.523	1914.11	1.434	1548.53		1.435	348.548	1.61	979.755	1.538	1543.96
	0.758	370.883	2.106	707.547	1.189	511.815		1.08	1587.87	1.199	618.888	1.379	745.213
	1.149	760.05	1.697	1073.39	2.337	883.692		0.807	600.505	1.355	2796.09	1.218	1061.18
	1.557	391.168	1.814	1461.42	1.915	1201.79		1.051	488.722	1.075	985.703	1.75	1247.92
	1.062	920.261	1.111	827.279	1.495	1007.13		1.011	303.086	0.925	2175.73	1.378	744.715
	0.919	1009.52	1.95	1593.82	2.636	1124.46		1.598	433.086	1.067	1780.39	1.061	869.072
	0.866	249.066	2.57	2183.38	1.588	2466.99		1.267	717.512	1.299	1082.26	1.873	966.259
	0.913	812.268	1.253	2126.24	2.085	1583.27		1.231	614.871	1.377	1932.54	1.424	1053.56
	1.05	735.971	2.057	583.663	1.356	1055.35		1.154	460.313	1.427	331.568	1.377	1238.59
	1.273	660.771	1.527	1516.03	1.746	1886.88		1.36	424.85	1.28	872.195	0.974	629.802
	1.04	888.987	1.258	1195.66	2.056	856.408		1.184	239.54	0.915	1245.77	2.048	844.148
	1.071	471.163	1.651	926.26	1.877	1700.18		1.445	611.671	1.282	1580.88	1.277	1016.28
	1.219	1061.84	2.038	730.215	2.4	1305.18		1.127	523.87	1.179	1386.12	2.15	714.139
	1.184	865.895	1.504	838.784	2.068	1601.23		1.309	789.433	1.041	1457.25	1.217	1584.19
	1.283	524.195	1.743	1335.43	1.319	1353.19		1.409	1095.06	1.039	1409.05	1.723	1073.9
	0.868	525.247	1.303	1170.92	1.898	864.568		1.059	722.325	1.282	1564.07	1.828	1925.15
	0.934	349.223	1.616	1150.96	2.302	1504.12		0.763	754.849	1.201	1173.38	1.625	2030.9
	1.066	491.239	0.947	279.558	1.262	544.306		1.519	514.344	1.06	1466.82	1.448	804.083
	0.866	691.462	1.283	1816.55	1.402	1219.05		1.033	783.911	1.247	1339.62	1.712	1587.37
	1.159	944.44	1.126	1325.6	1.737	1526.51		0.842	312.21	1.381	2159.33	1.535	611.127
	1.061	730.45	1.283	845.038	2.123	1161.76		1.419	369.273	1.605	1018.48	1.506	709.973
	1.004	598.879	1.123	1305.17	1.354	627.336		1.066	369.207	1.309	1406.51	1.946	750.288
	1.049	299.774	0.92	1589.64	1.535	1483.57		0.935	290.675	1.181	896.197	1.907	2883.84
	1.31	520.881	1.069	2152.76	1.474	868.865		1.357	605.462	1.269	1268.01	1.888	2495.43
	0.88	623.287	1.745	671.043	1.947	1980.67		0.993	275.366	1.08	1258.23	1.961	1242.82
	1.061	821.383	1.186	1712.44	1.739	923.951		0.688	249.688	1.277	1045.31	1.826	461.074
	0.94	1263.03	1.255	1870.95	3.14	722.525		1.126	937.772	1.008	1904.7	2.096	812.754
	0.722	229.673	1.926	273.396	1.902	1320.18		1.044	587.981	1.016	531.246	1.99	1340.11
	1.336	313.117	1.643	1150.84	2.151	2884.11		1.246	496.454	1.102	1205.63	1.658	419.26
	0.958	879.098	2.191	2076.08	2.46	376.612		1.255	237.289	1.442	945.161	1.604	1177.81
	0.787	598.641	1.824	603.798	2.438	1466.78		1.133	207.718	1.032	1126.83	1.969	1115.54
	0.886	424.675	2.137	1039.16	1.91	495.881		1.122	778.649	1.231	1505.95	2.113	2263.65
	1.067	800.575	1.483	1000.68	1.788	1019.23		1.211	282.066	1.693	1751.89	2.294	1092.53
	1.005	236.419	1.076	1781.55	1.919	915.146		0.953	840.424	1.222	2179.95	1.858	1188.78
	1.385	337.68	1.866	1198.71	1.615	493.837				1.017	1158.6	1.854	1273.83
	1.351	353.329	1.322	850.039	2.483	1417.92				1.465	1330.29	1.908	1489.5
	0.899	580.456	1.226	1131.46	1.596	479.976				1.506	972.257	2.075	664.99
	1.688	1345.21	2.123	2044.76	1.583	1968.43				1.262	686.136	1.363	1423.23
	0.967	1041.51	1.114	1581.27	2.296	1660.7				1.183	2234.36	1.431	1505.78
	1.462	443.399	2.012	1527.03	2.006	2151.7				1.368	2122.29	1.806	706.171
			1.983	1641.18	1.77	1082.18				0.921	1574.96	2.1	1380.89
			1.564	1424.95	1.025	2087.42				1.308	887.82	1.952	867.089
			2.444	255.88	1.917	972.236				1.29	1926.05	2.936	1704.51
			1.265	937.591	1.924	1387.13				1.163	784.03	2.386	1994.42
			2.876	1685.27	1.506	1272.11				1.352	246.672	1.729	1455.52
			1.364	843.012	2.097	2253.28				1.382	1675.22	1.54	2546.16
			2.32	1511.61	1.383	2533.27				1.015	1315.53	1.593	1397.76
			1.14	463.925	2.061	914.478				1.607	681.17	2.417	1281.63
			2.134	2089.91	1.807	1008.47				1.095	815.929	1.525	1827.26
			1.026	1921.33	1.796	466.546				1.098	1438.37	1.474	2490.27
			1.468	3317.61	2.353	1279.96				1.186	1501.61	2.741	3085.19
			1.25	1378.67	1.982	660.582				0.975	1036.98	2.23	727.914
			1.013	1634.53	1.81	1760.47				0.948	1197.22	2.294	2826.38
			2.724	655.151	1.795	488.181				1.071	640.923	1.209	1523.47
			1.89	1606.34	1.251	2135.11				0.896	1673.77	1.145	2287.45
			1.414	1006.01	1.263	1197.76				1.285	1252.76	1.662	1528.51
			1.327	1011.41	1.255	257.652				1.154	273.634	1.198	2258.71
			2.6	1522.71	1.875	1540.35				0.974	1355.39	1.713	2021.32
			2.135	1155.63	2.228	471.835						2.075	1629.1
			2.097	978.337	2.72	1807.25						1.758	2018.03
			1.172	1552.31	1.558	669.547						2.065	829.728
			1.493	779.313	1.572	555.515						2.257	916.97
					2.06	1346.44						1.918	717.082
					1.446	2072.22						1.906	1483.61
					1.652	1500.5						2.007	1288.92
					2.174	1128.95						2.808	1701.55
					1.455	824.62						1.586	2216.09
					1.972	920.684						2.245	1996.71
					2.296	1176.29						2.064	1899.73
					1.994	1451.08						1.772	1889.01
					1.587	3693.62						2.47	1144.93
					1.99	2228.44						1.561	1785.18
					1.472	2477.72						1.91	1371.36
					1.722	1548.2						1.834	1301.9
					1.904	1043.76						1.618	1619.05
					1.731	1459.15						1.722	2185.98
					1.468	1261.18						2.284	1954.7
					2.908	907.344						1.937	960.576
					1.924	1286.01						1.709	1412.16
					1.894	1975.1						1.688	1573.4
					2.947	1487.32						2.461	1704.56
					1.961	1639.39						1.658	1601.2
					2.194	920.974						1.713	1638.26
					2.168	1783.47						2.423	1033.2
					2.312	1505.55						2.46	1139.36
					2.783	1443.93						1.774	599.127
					1.961	1209.21						2.213	471.25
					2.579	1623.5						2.468	1202.75
					2.464	1663.01						2.004	738.61
					2.965	1168.05						2.226	1118.56
					2.719	1439.24						2.2	1053.19
					1.817	1312.52						2.01	1894.71
					1.422	2285.11						2.205	823.504
					2.311	784.182						1.582	745.84
					2.393	800.343						1.761	1248.88
					1.734	955.865						2.174	1362.37
					1.951	2306.48						2.372	1458.17
					2.18	1440.04						1.92	1640.42
					2.277	1170.3						1.659	1142.5
												1.837	1747.52
												1.864	1005.35
												2.094	969.472
												1.836	664.546
												1.955	1385.3

## Sheet: intensities mesurements
Phase I 7h
ROI voir folder				Tubulin Int
QnMT intensity		1064.43				449.707				370.883				760.05				391.168				920.261				1009.52				249.066				812.268				735.971				660.771				888.987
n=	41	1067.39				451.393				333.856				774.968				367.411				950.204				1006.15				235.479				789.064				701.408				671.942				878.941
		1006.38				424.312				327.143				710.329				366.308				846.074				961.646				206.03				785.92				688.652				614.775				831.616
signal	signal+BKG	reel int		signal	signal+BKG	reel int		signal	signal+BKG	reel int		signal	signal+BKG	reel int		signal	signal+BKG	reel int		signal	signal+BKG	reel int		signal	signal+BKG	reel int		signal	signal+BKG	reel int		signal	signal+BKG	reel int		signal	signal+BKG	reel int		signal	signal+BKG	reel int		signal	signal+BKG	reel int		signal	signal+BKG
281.159	286.272	-10.2274		188.982	202.328	-26.692		323.449	295.001	56.8966		150.167	166.667	-33		350.729	313.856	73.7464		806.028	660.919	290.216		220.315	257.422	-74.2138		375.047	364.281	21.5336		339.647	344.774	-10.255		399.562	371.061	57.0002		448.603	424.876	47.4552		234.947	265.796	-61.6984		373.786	398.795
229.762	260.414	-61.303		349.513	309.599	79.8284		399.384	336.371	126.026		200.935	153.651	94.5674		453.428	427.971	50.9136		1153.02	848.257	609.535		546.518	456.378	180.279		402.878	422.941	-40.126		408.573	391.713	33.7212		457.743	424.34	66.8058		518.678	475.938	85.4808		321.996	341.32	-38.6472		532.926	490.117
298.132	307.133	-18.0012		374.909	304.199	141.421		463.761	426.109	75.3042		177.869	206.918	-58.0972		510.71	490.403	40.6144		1441.16	1098.08	686.159		1072.33	780.74	583.179		521.892	514.544	14.6964		525.186	478.638	93.0956		605.934	508.415	195.039		572.3	535.388	73.8246		342.908	341.971	1.8748		481.42	451.923
526.434	446.363	160.143		568.546	470.995	195.101		785.519	648.273	274.492		360.085	311.546	97.078		489.527	486.188	6.679		1672.95	1249.91	846.074		1581.01	1077.94	1006.15		896.496	852.088	88.8162		658.602	566.084	185.037		832.141	687.15	289.981		729.044	721.295	15.4972		545.072	489.454	111.236		742.777	568.014
696.541	656.622	79.8372		672.435	580.945	182.981		848.663	701.5	294.325		452.718	424.173	57.0906		585.906	504.894	162.025		1842.59	1360.34	964.505		1760.58	1230.19	1060.78		1136.12	1033.1	206.03		981.379	766.884	428.991		1173.98	892.689	562.58		1201.32	1065.87	270.908		809.43	717.196	184.467		939.17	696.543
897.626	797.399	200.455		765.039	687.575	154.928		939.797	713.972	451.649		793.789	589.729	408.121		720.743	669.352	102.781		1858.69	1383.59	950.204		1634.85	1154.03	961.646		1061.29	990.69	141.2		1400.72	1071.18	659.079		1583.15	1238.83	688.652		1630.76	1282.97	695.597		1206.33	948.628	515.41		985.504	766.782
1299.73	1092.64	414.167		1025.08	899.015	252.132		857.072	696.264	321.615		1061.26	832.191	458.133		896.905	792.631	208.547		1755.01	1343.73	822.562		1534.43	1079.59	909.673		948.448	795.604	305.688		1545.85	1210.8	670.095		1727.17	1318.24	817.854		1749.99	1442.6	614.775		1538.89	1099.42	878.941		921.747	676.35
1746.97	1438.54	616.846		1132.75	907.058	451.393		855.917	692.345	327.143		1148.86	794.186	709.353		1092.43	932.56	319.734		1589.3	1243.54	691.522		1523.44	1060.24	926.387		731.036	650.832	160.408		1611.49	1216.96	789.064		1527.28	1203.3	647.969		1715.64	1428.05	575.191		1658.38	1180.18	956.405		777.568	596.357
2286.23	1726.48	1119.51		1143.51	931.35	424.312		789.638	622.71	333.856		1334.92	947.439	774.968		1023.07	911.201	223.739		1512.92	1202.8	620.228		1310.38	901.01	818.732		635.142	566.63	137.024		1668.19	1237.28	861.819		1444.85	1109.12	671.458		1821.94	1485.96	671.942		1484.09	1093.02	782.143		739.329	567.281
2361.76	1865.58	992.35		1108.6	871.896	473.418		592.914	482.329	221.171		1204.65	928.925	551.457		1083.52	950.745	265.561		1448.99	1098.36	701.262		1034.77	765.807	537.934		608.391	490.651	235.479		1576.72	1183.76	785.92		1422.69	1071.99	701.408		1693.13	1398.89	588.473		1555.62	1139.81	831.616		732.511	574.013
2407.28	1873.59	1067.39		1022.14	813.2	417.88		503.041	382.777	240.527		1306	908.574	794.854		995.72	917.147	157.144		1169.41	912.43	513.968		841.813	646.755	390.115		538.9	444.623	188.555		1427	1047.48	759.028		1246.36	1008.49	475.754		1410.96	1182.1	457.715		1457.34	1055.96	802.772		702.242	539.042
2256.9	1753.71	1006.38		1022.31	818.626	407.359		282.432	256.374	52.1152		1270.99	915.827	710.329		928.991	833.201	191.58		791.389	655.163	272.453		706.406	523.768	365.277		429.903	363.527	132.751		1251.23	948.41	605.634		1112.32	860.168	504.309		1237.84	1077.24	321.217		1370.78	994.598	752.357		703.028	505.5
2140.17	1687.77	904.799		967.962	772.379	391.166		194.65	187.004	15.292		1069.92	783.599	572.651		860.998	783.003	155.99		594.39	497.216	194.349		590.029	495.922	188.214		358.647	309.659	97.9766		1030.18	858.884	342.591		845.848	701.782	288.133		1106.46	1005.35	202.214		1160.87	868.355	585.02		537.397	413.942
1863.1	1487.28	751.656		907.52	700.252	414.537		138.58	142.759	-8.3592		927.27	686.559	481.421		1008.84	825.687	366.308		559.633	486.853	145.56		431.533	398.769	65.5272		259.768	254.51	10.5158		774.978	684.468	181.021		482.37	464.596	35.5482		1028.9	901.526	254.744		873.138	638.357	469.561		370.265	345.914
1498.29	1204.74	587.095		739.62	596.86	285.52		162.944	126.331	73.2266		809.633	605.983	407.3		981.973	798.268	367.411		480.094	444.44	71.3078		365.338	364.793	1.0912		240.123	211.331	57.585		518.833	446.192	145.282		264.392	319.61	-110.436		816.15	743.47	145.36		567.259	423.011	288.496		214.692	243.833
1103.57	940.773	325.594		597.314	489.64	215.349						574.163	421.941	304.445		906.402	769.197	274.411		403.433	366.781	73.304						190.181	193.886	-7.4086						249.674	284.067	-68.7858		648.768	575.661	146.212		402.86	315.109	175.502		187.257	197.664
777.063	693.032	168.063		461.881	412.757	98.2484						278.3	270.374	15.8526		854.549	709.755	289.588		393.365	370.81	45.1096						124.368	163.452	-78.168						152.255	189.454	-74.398		468.406	500.236	-63.6614		293.71	272.903	41.6142		199.697	209.417
603.663	540.803	125.718		335.606	334.827	1.558						189.053	212.636	-47.1656		786.257	566.365	439.783																						455.304	495.514	-80.4208		256.026	268.762	-25.4718		218.97	201.214
479.117	459.926	38.3812		291.33	312.903	-43.147						141.261	153.013	-23.5042		519.642	436.885	165.515
380.687	343.086	75.2024		294.701	278.298	32.8058						133.365	129.139	8.453		411.985	352.455	119.059
301.4	314.562	-26.3254		287.807	289.786	-3.9578						166.224	158.573	15.3026		368.659	348.091	41.1358
216.799	248.967	-64.3356														265.01	251.147	27.7258
197.85	248.871	-102.043														243.031	263.327	-40.5924
																255.403	237.852	35.1026
																229.474	198.861	61.2264
Phase II
ROI voir folder				Tubulin Int
QnMT intensity		1130.15				1914.11				707.547				1073.39				1461.42				827.279				1593.82				2183.38				2126.24				583.663				1516.03				1195.66
n=	63	1095.01				1898.8				689.488				1076.19				1432.14				867.525				1583.47				2182.29				2116.04				579.929				1515.2				1176.23
		1071.9				1782.76				664.696				1012.06				1388.37				745.746				1554.82				2007.17				2111.89				526.541				1508.55				1127.66
753.773	680.693	146.161		1463.52	1359.09	208.85		1221.08	1113.41	215.344		468.27	392.373	151.794		765.437	689.082	152.711		603.494	602.281	2.4254		351.913	305.111	93.6028		1436.8	1265.15	343.305		1210.44	1210.26	0.3526		214.098	206.082	16.0308		1040.74	972.639	136.2		494.279	540.079	-91.6004		932.312	873.229
941.39	815.214	252.351		1847.38	1605.88	483.008		1581.67	1419.72	323.892		583.211	450.03	266.362		1142.6	982.874	319.456		863.486	780.85	165.271		601.131	533.154	135.954		2180.72	1786.43	788.586		1483.75	1415.16	137.167		352.187	304.323	95.7288		1520.49	1289.04	462.898		666.105	714.3	-96.3898		1322.87	1182.95
1146.65	1054.32	184.654		2210.59	1819.4	782.394		1836.49	1760.72	151.532		831.393	588.028	486.729		1776	1542.74	466.527		1391.49	1203.14	376.699		1017.16	870.631	293.049		3329.06	2685.84	1286.42		1911.7	1743.8	335.792		513.644	426.308	174.673		2006.01	1705.84	600.33		1196.29	1065.45	261.686		1419.27	1224.36
1386.18	1225.12	322.126		3124.76	2552.15	1145.24		2507.23	2360.43	293.618		850.493	668.541	363.904		2819.56	2398.44	842.254		2002.04	1568.28	867.525		1549.84	1219.91	659.847		4170.36	3370.67	1599.38		2560.65	2294.78	531.736		567.024	396.745	340.558		2644.26	2232.25	824.021		1751.85	1399.41	704.896		1662.5	1470.51
1977.89	1654.02	647.736		3944.43	3186.44	1515.98		2663.76	2525.6	276.318		1369.95	1021.63	696.624		3766.22	3072.03	1388.37		2091.26	1656.98	868.566		1875.1	1356.78	1036.63		4552.48	3548.89	2007.17		3570.17	3077.5	985.336		698.955	514.279	369.352		3108.81	2568.8	1080.02		2015.7	1545.02	941.373		2087.05	1795.89
2498.43	1987.2	1022.47		4329.12	3437.74	1782.76		2599.82	2385.72	428.207		1586.18	1166.06	840.237		4061.27	3279.4	1563.75		2096.8	1723.93	745.746		2420.5	1628.77	1583.47		4615.21	3434.88	2360.66		4690.28	3834.11	1712.34		867.082	655.93	422.304		3390.79	2702.95	1375.68		2103.61	1515.5	1176.23		2352.7	1930.19
2517.32	1969.81	1095.01		4547.32	3516.94	2060.77		2566.1	2245.62	640.965		1768.19	1266.26	1003.86		3888.57	3172.5	1432.14		1904.9	1576.96	655.883		2623.44	1801.86	1643.16		4549.39	3458.24	2182.29		5433.91	4358.51	2150.8		916.324	694.235	444.179		3247.43	2649.83	1195.2		2173.64	1532.1	1283.08		2323.75	1921.89
2467.45	1931.5	1071.9		4591.81	3642.41	1898.8		2408.63	2076.28	664.696		1840.2	1338.32	1003.75		3489.22	2828.05	1322.34		1721.89	1434.1	575.587		2616.25	1838.84	1554.82		3977.26	3096.88	1760.75		5430.06	4372.04	2116.04		880.481	660.906	439.151		3260.59	2550.7	1419.78		2021.66	1517.69	1007.95		2441.44	1958.33
2500.73	1888.95	1223.55		4458.95	3700.4	1517.1		2361.95	2017.21	689.488		1786.31	1293.98	984.651		3114.99	2523.14	1183.68		1601.44	1309.19	584.491		2540.38	1774.95	1530.86		3732.94	2912.04	1641.79		5198.05	4142.11	2111.89		900.129	636.859	526.541		3159.86	2551.33	1217.05		1921.04	1378.37	1085.35		2427.2	2001.86
2016.83	1544.48	944.704		4366.78	3633.67	1466.22		2176.63	1865.02	623.222		1857.62	1319.53	1076.19		2870.53	2362.49	1016.08		1497.03	1231.46	531.14		2302.87	1665.69	1274.36		3495.27	2744.32	1501.89		4661.64	3703.15	1916.97		858.455	606.611	503.687		3369.39	2615.11	1508.55		1779.15	1215.32	1127.66		2483.31	2002.36
1793.32	1345.83	894.974		4046.24	3444.77	1202.94		2047.46	1747.1	600.718		1815.7	1249.73	1131.93		2505.93	2013.62	984.628		1520.22	1210.23	619.984		1987.32	1463.9	1046.85		2920.31	2423.48	993.661		3928.67	3162.26	1532.82		879.575	657.09	444.972		3433.86	2671.7	1524.33		1451.89	1034.97	833.855		2171.07	1863.06
1539	1156.88	764.251		3568.78	3020.78	1096		1974.28	1590.05	768.456		1597.52	1091.48	1012.06		2257.02	1853.9	806.238		1150.81	1005.52	290.583		1615.23	1203.97	822.513		2600.77	2153.41	894.711		3054.05	2550.3	1007.49		873.605	621.181	504.849		3193.38	2435.78	1515.2		995.891	720.842	550.098		2023.15	1709.86
1211.28	915.819	590.913		2996.06	2593.48	805.168		1722.11	1422.11	599.985		1360.47	990.461	740.022		2001.21	1712.41	577.583		936.899	784.501	304.796		1419.44	1100.66	637.548		2324.64	1867.06	915.171		2368.14	2034.59	667.089		921.725	681.091	481.267		2756.46	2145.62	1221.68		556.304	493.071	126.466		1873.76	1600.52
770.887	647.334	247.105		2580.91	2383.45	394.926		1441.77	1183.51	516.511		1237.99	908.588	658.802		1887.1	1584.98	604.242		739.303	651.596	175.415		1261.49	977.567	567.837		1849.97	1617.42	465.09		1674.83	1514.54	320.572		1002.12	712.159	579.929		2280.44	1774.88	1011.12		447.402	452.329	-9.853		1522.71	1326.72
550.067	535.412	29.3094		2130.43	2011.87	237.114		1161.28	976.094	370.374		1088.69	824.359	528.671		1706.1	1459.61	492.991		687.947	597.674	180.546		1062.76	824.494	476.537		1641.57	1493.82	295.487		1186.97	1093.72	186.506		1009.15	686.895	644.519		1611.82	1366.03	491.57		330.104	325.119	9.9702		1197.94	1062
404.465	405.591	-2.2534		1641.73	1595.61	92.2508		1090.22	901.602	377.24		963.272	750.869	424.807		1530.76	1305.97	449.577		456.522	435.388	42.2682		1074.96	854.418	441.093		1618.35	1491.05	254.596		916.156	872.572	87.1688		885.4	645.711	479.377		1105.43	998.715	213.43						1024.37	945.924
388.346	341.787	93.1182		1310.44	1349.01	-77.1228		952.998	795.178	315.641		619.855	520.529	198.653		1322.66	1147.78	349.756		478.643	419.958	117.37		1080.65	840.569	480.153		1510.59	1376.44	268.314		738.957	735.781	6.3516		826.093	586.677	478.832		805.563	808.17	-5.2124						587.834	552.657
325.29	309.39	31.7988		1207.26	1242.86	-71.1972		772.396	673.65	197.492		772.41	551.064	442.694		1138.7	991.463	294.471						979.164	744.91	468.508		1335.39	1170.53	329.719		681.196	616.244	129.904		760.28	594.699	331.161		835.64	827.923	15.4346						437.766	369.229
								743.597	625.63	235.933		609.102	458.193	301.817		993.976	861.17	265.612						849.765	692.585	314.36		1200.5	1184.33	32.3586						740.198	533.392	413.612										341.727	317.191
								747.568	605.462	284.213		506.427	416.559	179.736		806.99	727.72	158.54						724.017	638.226	171.581		1202.13	1132.56	139.142						499.837	401.2	197.274										233.878	245.181
								553.55	469.677	167.746		439.51	330.479	218.063		521.892	542.572	-41.3592						594.384	543.169	102.43		1032.36	1047.31	-29.8988						357.168	321.255	71.8244
								345.539	328.737	33.6038		257.205	208.261	97.8878		520.139	535.9	-31.5238										996.669	1057.17	-121.011						243.532	247.728	-8.392
																												994.533	1016.22	-43.375						180.51	169.126	22.7692
																												868.289	882.622	-28.6656						256.763	199.346	114.833
																												632.469	702.041	-139.145
																												726.456	748.627	-44.3418
																												649.066	718.41	-138.689
Phase III
ROI voir folder				Tubulin Int
QnMT intensity		1648.07				1548.53				511.815				883.692				1201.79				1007.13				1124.46				2466.99				1583.27				1055.35				1886.88				856.408
n=	100	1664.14				1576.51				516.226				844.141				1152.07				988.683				1139.14				2466.77				1614.72				1059.2				1889.39				845.129
		1610.21				1439.29				483.729				839.897				1147.59				985.241				1090.51				2428.45				1438.45				1044.96				1837.86				818.598
1564.62	1503.33	122.57		816.17	722.549	187.242		891.503	805.039	172.927		872.16	753.767	236.786		659.352	649.261	20.1824		2326.49	2250.38	152.222		669.844	660.371	18.9464		2293.47	2078.86	429.216		1860.29	1603.78	513.022		381.177	386.039	-9.724		1541.68	1547.69	-12.0136		762.393	696.717	131.353		1584.35	1571.18
1999.11	1829.55	339.119		1040.77	948.05	185.448		1222.55	1067.16	310.776		1357.44	1153.4	408.07		883.678	812.912	141.53		2749.46	2582.6	333.73		961.01	852.952	216.117		2882.9	2496.73	772.33		2566.02	2069.58	992.87		628.084	589.127	77.9152		2020.25	1947.84	144.819		858.697	790.552	136.29		1987.91	1899.26
2224.5	1995.12	458.747		1305.86	1172.76	266.206		1692.37	1453.32	478.106		1900.01	1567.23	665.543		1184.26	1066.49	235.531		3171.3	2945.87	450.858		1135.41	979.753	311.322		3798.1	3189.46	1217.27		3157.68	2497.78	1319.81		956.793	829.271	255.044		2858.11	2575.9	564.416		1177.38	997.186	360.38		2662.57	2432.21
2624.58	2236.76	775.649		1664.28	1464.35	399.847		1957.51	1689.76	535.49		2446.59	1963.07	967.038		1457	1323.4	267.19		3548.7	3276.61	544.169		1427.42	1240.97	372.889		4939.13	4002.79	1872.68		3490.6	2683.24	1614.72		1188.63	984.799	407.656		3963.77	3369.96	1187.63		1515.18	1206.81	616.737		3361.74	2938.34
3300.22	2699.76	1200.92		2257.83	1917.99	679.69		1931.66	1673.55	516.226		2648.01	2228.07	839.897		1659.96	1482.55	354.828		3984.12	3611.63	744.974		1700.74	1517.64	366.205		5836.01	4621.79	2428.45		3484.35	2636.02	1696.66		1729.4	1355.44	747.919		4368.41	3629.88	1477.08		1722.8	1380.98	683.641		3956.47	3253.33
3734.73	3025.16	1419.14		2783.04	2302.12	961.831		1694.55	1488.4	412.305		2647.65	2278.13	739.04		2006.09	1785.71	440.753		4096.08	3742.75	706.655		2206.57	1943.08	526.986		6184.49	4931.61	2505.75		3295.3	2576.87	1436.88		1990.88	1579.72	822.322		4583.4	3753.75	1659.32		1878.02	1468.72	818.598		4133.96	3380.71
3990.49	3253.23	1474.52		3212.2	2530.99	1362.4		1512.72	1270.85	483.729		2569.06	2192.39	753.337		2445.29	2060.77	769.051		4166.3	3757.67	817.266		2595.73	2246.63	698.202		6163.42	4930.03	2466.77		3218.75	2499.53	1438.45		2215.99	1707.23	1017.51		4803.33	3884.4	1837.86		1913.9	1491.34	845.129		4306.25	3613.36
4093	3260.93	1664.14		3387.47	2599.21	1576.51		1324.73	1111.85	425.768		2414.78	2068.49	692.598		2551.98	2141.44	821.075		4388.09	3895.47	985.241		2747.89	2268.46	958.851		5957.05	4756.74	2400.63		3040.63	2375.09	1331.08		2277.82	1748.22	1059.2		4874.46	3907.77	1933.39		1863.39	1410.65	905.498		4414.22	3591.24
4106.39	3271.46	1669.85		3463.49	2648.6	1629.78		1145.82	956.47	378.693		2264.92	1915.74	698.363		2578.19	2043.96	1068.47		4368.96	3878.15	981.62		2639.78	2094.53	1090.51		5589.35	4478.66	2221.39		2846.33	2225.98	1240.7		2341.99	1811.05	1061.88		4661.79	3717.09	1889.39		1804.15	1409.03	790.246		4534.96	3677.94
4255.42	3450.32	1610.21		3280.87	2561.23	1439.29		931.526	790.165	282.722		2269.37	1931.19	676.35		2488.27	2006.2	964.143		4179.68	3692.24	974.871		2490.22	1918.35	1143.74		4912.7	4061.17	1703.08		2696.28	2116.28	1160		2340.29	1817.81	1044.96		4333.47	3424.61	1817.71		1729.24	1324.98	808.51		4468.41	3707.72
4174.93	3412.48	1524.9		3062.36	2418.47	1287.77		877.75	714.609	326.281		2292.38	1870.31	844.141		2542.32	1968.53	1147.59		4069.16	3545.42	1047.47		2448.58	1879.01	1139.14		4324.97	3567.75	1514.44		2581.5	2074.43	1014.15		2144.45	1690.97	906.946		4123.81	3226.45	1794.72		1582.51	1262.65	639.723		4479	3701.82
3984.16	3287.44	1393.44		3037.66	2376.56	1322.19		774.664	662.027	225.274		2051.47	1745.52	611.894		2570.58	1994.55	1152.07		3709.44	3215.1	988.683		2387.41	1849.31	1076.2		3869.45	3226.09	1286.73		2546.36	2005.82	1081.08		1990.99	1584.9	812.175		3941.28	3114.67	1653.23		1557.37	1203.28	708.186		4590.9	3737.32
3810.38	3171.36	1278.04		2891.9	2315.26	1153.27		610.348	535.574	149.549		2009.4	1629.17	760.464		2580.31	1927.46	1305.69		3255.45	2814.19	882.511		2278.06	1764.39	1027.34		3410.11	2867.07	1086.08		2424.45	1921.06	1006.77		1821.19	1446.65	749.079		3633.43	2858.01	1550.82		1369.89	1120.79	498.2		4652.07	3812.41
3434.8	2960.99	947.634		2646.65	2168.87	955.551		409.012	385.362	47.2984		1950.71	1604.1	693.218		2437.97	1864.43	1147.09		2762.11	2385.48	753.278		2058.25	1642.97	830.561		2915.38	2450.23	930.298		2308.37	1893.2	830.341		1416.9	1197.07	439.662		3059.12	2434.73	1248.79		1286.64	1042.32	488.644		4593.19	3765.88
3200.05	2792.21	815.67		2585.95	2124.44	923.033		287.861	299.239	-22.756		1953.71	1559.12	789.187		2304.38	1768.01	1072.73		2155.23	1901.28	507.9		1973.28	1611.65	723.248		2579.89	2221.16	717.471		2201.29	1746.81	908.954		1066.47	972.028	188.885		2546.18	2092.87	906.61		1077.78	915.047	325.465		4352.42	3561.23
2915.76	2542.06	747.394		2368.96	2006.03	725.861		259.006	266.24	-14.4688		1813.83	1480.35	666.955		2159.28	1638.8	1040.97		1643.55	1503.43	280.259		1952.79	1542.91	819.77		2329.45	2001.24	656.428		1825.81	1507.71	636.19		835.316	797.588	75.4544		2175.08	1816.35	717.446		976.934	816.452	320.966		4052.01	3351.21
2526.63	2262.09	529.077		2029.39	1760.91	536.96		0	0	0		1694.34	1363.88	660.922		2033.73	1545.02	977.424		1187.61	1140.95	93.304		1809.18	1439.9	738.567		1926.94	1707.03	439.827		1607.88	1328.57	558.621		636.52	641.8	-10.5592		1842.89	1560.87	564.031		924.795	822.772	204.046		3682.31	3070.79
2217.39	2011.44	411.901		1751.59	1577.08	349.023		0	0	0		1424.45	1205.43	438.057		1786.28	1401.29	769.994		1021.35	1008.97	24.764		1703.72	1383.73	639.977		0	0	0		1438.51	1197.53	481.966		654.528	604.43	100.197		1428.77	1273.59	310.366		853.265	761.246	184.038		3271.11	2766.78
1877.66	1708.08	339.158		1518.68	1437.69	161.992		0	0	0		1150.95	1016.63	268.638		1593.53	1315.66	555.739		0	0	0		1720.42	1376.06	688.713		0	0	0		1132.26	1023.2	218.126		557.857	552.119	11.4768		1366.2	1243.06	246.281		767.466	709.251	116.43		2803.48	2430.76
1599.69	1499.49	200.382		0	0	0		0	0	0		984.073	865.648	236.85		1482.69	1228.44	508.515		0	0	0		1644.81	1325.63	638.357		0	0	0		960.954	904.505	112.898		0	0	0		1123.1	1060.61	124.988		675.633	590.994	169.278		2487.69	2160.95
1561.09	1511.94	98.316		0	0	0		0	0	0		912.047	808.257	207.58		1326.97	1122.26	409.423		0	0	0		1535.29	1279.71	511.158		0	0	0		923.786	856.838	133.895		0	0	0		911.369	867.338	88.0616		572.766	521.804	101.924		2210.12	1943.89
1539.17	1462.41	153.514		0	0	0		0	0	0		846.169	757.32	177.699		1112.86	997.483	230.75		0	0	0		1320.53	1154.08	332.899		0	0	0		826.412	773.644	105.535		0	0	0		785.986	755.775	60.4232		449.721	427.255	44.9312		1950.87	1759.34
0	0	0		0	0	0		0	0	0		654.649	603.251	102.796		987.142	918.606	137.072		0	0	0		1304.33	1116.28	376.104		0	0	0		0	0	0		0	0	0		0	0	0		445.953	417.384	57.1376		1630.63	1513.37
0	0	0		0	0	0		0	0	0		565.866	522.963	85.8064		0	0	0		0	0	0		1289.21	1101.6	375.233		0	0	0		0	0	0		0	0	0		0	0	0		450.233	400.766	98.9344		1468.38	1396.18
0	0	0		0	0	0		0	0	0		0	0	0		0	0	0		0	0	0		1111.94	989.138	245.61		0	0	0		0	0	0		0	0	0		0	0	0		335.893	330.116	11.5552		1290.22	1260.86
0																								1027.13	910.486	233.286																		0	0	0		0	0
0																								863.802	800.141	127.322																		0	0	0		0	0
0																								716.417	718.838	-4.8416
0																								668.33	657.603	21.4544
0																								589.19	585.458	7.464
Phase III following
ROI voir folder				Tubulin Int
		1082.18				2087.42				972.236				1387.13				1272.11				2253.28				2533.27				914.478				1008.47				466.546				1279.96				660.582
		1113.8				2042.95				974.441				1325.46				1260.45				2149.55				2519.69				915.826				967.281				493.462				1299.02				664.166
		1010.41				2021.97				925.208				1314.89				1218.85				2011.74				2510.87				869.737				814.967				391.702				1231.4				586.411
671.112	614.917	112.392		1907.19	1864.24	85.896		850.684	817.3	66.7676		1727.18	1824.39	-194.411		388.833	373.5	30.6666		1373.18	1171.93	402.493		1994.9	1844.14	301.521		752.245	760.553	-16.6172		693.966	681.471	24.9902		755.354	740.661	29.385		526.44	484.24	84.4004		379.363	399.544	-40.3606		1969.33	1628.42
1281.36	1153.11	256.486		2749.14	2481.49	535.314		1372.32	1214.91	314.805		2102.98	2146.4	-86.835		501.516	419.984	163.064		2270.19	1813.21	913.958		2737.43	2446.71	581.435		947.33	947.696	-0.7312		833.021	866.187	-66.332		982.862	955.27	55.1836		652.42	633.266	38.3088		419.713	426.703	-13.98		2088.47	1676.03
1785.22	1521.82	526.787		3515.8	3100.45	830.7		1874.2	1576.7	595.001		2783.57	2626.88	313.366		683.385	590.569	185.632		2943.37	2318.04	1250.67		3752.07	3237.61	1028.93		1287.64	1230.01	115.269		1355.36	1257.88	194.968		1258.74	1183.38	150.707		882.684	798.543	168.282		588.855	537.626	102.457		2522.71	1931.03
2055.98	1682.55	746.854		4545.75	3859.97	1371.56		2392.12	1950.05	884.148		3625.84	3243.29	765.101		944.453	754.695	379.517		4196.3	3190.43	2011.74		4630.87	3852.4	1556.94		1524.41	1514.06	20.7018		1696.15	1453.45	485.403		1476.93	1414.46	124.927		1620.22	1342.09	556.27		752.318	630.836	242.965		2836.8	2145.62
2371.34	1814.44	1113.8		5288.81	4379.43	1818.77		2562.58	2075.35	974.441		4046.65	3488.1	1117.11		1287.63	1015.15	544.964		4948.23	3648.96	2598.53		5854.38	4569.75	2569.26		1701.93	1565.41	273.037		2147.99	1743.74	808.502		1990.74	1800.06	381.363		2475.6	2019.72	911.769		946.485	781.576	329.818		2840.68	2124.86
2406.02	1844.86	1122.33		5455.7	4434.23	2042.95		2774.1	2265.57	1017.06		4144.07	3486.62	1314.89		2113.96	1560.95	1106.04		4519.64	3444.87	2149.55		5762.7	4502.85	2519.69		2185.79	1976.98	417.613		2673.94	2052.36	1243.16		2413.16	2166.43	493.462		2858.89	2492.79	732.186		1142.12	943.218	397.812		2857.82	2082.69
2254.71	1749.5	1010.41		5284.58	4273.59	2021.97		2763.74	2301.14	925.208		3812.18	3311.44	1001.48		2360.47	1691.96	1337.03		4112.95	3142.44	1941.01		5652.49	4397.05	2510.87		2556.43	2273.58	565.696		2584.67	2101.03	967.281		2429.48	2172.24	514.473		3020.03	2577.02	886.033		1327.59	1080.74	493.709		3016.71	2176.68
2131.67	1639.49	984.364		4868.37	4007.71	1721.31		2457.09	2085.87	742.439		3646.34	3119.97	1052.73		2145.74	1603.83	1083.82		3459.92	2690.49	1538.86		5107.61	4002.54	2210.14		2797.86	2362.99	869.737		2339.89	1959.18	761.411		2221.79	2030.26	383.059		3340.64	2691.13	1299.02		1371.55	1105.48	532.128		3126.89	2291.27
1964.81	1540.99	847.657		5015.45	3916.79	2197.34		2242.49	1895.83	693.315		3698.8	3121.05	1155.51		2116.68	1577.68	1077.99		3254.16	2488.34	1531.64		4475.27	3643.6	1663.33		2855.75	2464.36	782.771		2271.83	1864.34	814.967		2123.32	2001.01	244.611		3344.49	2728.79	1231.4		1269.67	1010.28	518.784		3254.9	2289.84
1766.29	1361.45	809.673		4602.8	3614.42	1976.77		1906.52	1607.01	599.008		3751.94	2991.42	1521.05		2192.31	1600.55	1183.51		2901.99	2223.81	1356.36		4060.01	3357.1	1405.82		2804.65	2325.71	957.87		1984.13	1671.61	625.043		2129.12	1951.47	355.296		3305.14	2650.4	1309.47		1359.55	1027.46	664.166		2941.05	2116.88
1725.75	1309.32	832.866		3894.9	3258.43	1272.93		1717.9	1395.77	644.266		3537.74	2908.58	1258.33		2254.9	1677.62	1154.56		2660.4	1994.13	1332.55		3622.36	2990.27	1264.18		2542.03	2112.16	859.73		1907.06	1571.84	670.453		1893.85	1803.29	181.124		2909.14	2406.85	1004.59		1307.25	941.661	731.17		2633.13	1921.35
1568.12	1213.93	708.394		3388.63	2802.71	1171.83		1407.47	1182.95	449.039		3236.55	2573.82	1325.46		2312.96	1682.74	1260.45		2358.92	1788.13	1141.58		3055.69	2529.6	1052.19		2368.16	2029.85	676.613		1877.5	1600.01	554.97		1777.32	1648.13	258.384		2591.67	2250.94	681.465		1275.35	1004.67	541.354		2294.74	1681.74
1483.73	1129.29	708.883		2864.61	2398.66	931.904		1288.19	1083.11	410.159		2855.52	2337.21	1036.64		2172.74	1563.32	1218.85		2181.68	1687.88	987.606		2719.06	2288.85	860.42		2464.38	2062.38	803.986		1799.85	1508.36	582.995		1803.55	1614.48	378.126		2361.93	2042	639.855		1142.21	908.202	468.012		2098.65	1547.05
1331.38	1011.75	639.265		2305.37	1998.32	614.097		1132.02	1028.37	207.29		2801.96	2251.63	1100.67		1972.57	1471.49	1002.17		2114.18	1619.15	990.063		2440.36	2012.92	854.885		2361.53	1980.87	761.305		1839.73	1595.16	489.144		1684.3	1488.45	391.702		2158.07	1874.44	567.254		1106.69	876.825	459.729		2001.9	1526.66
1363.8	1059.56	608.475						1133.02	945.258	375.515		2594.01	2136.18	915.664		1708.77	1327.28	762.977		2035.46	1604.09	862.749		1906.92	1677.84	458.164		2357.67	1899.76	915.826		1732.96	1497.06	471.801		1523.11	1343.69	358.838		2004.94	1734.61	540.666		1112.81	887.232	451.155		1810.48	1417.17
1195.89	984.015	423.742						980.569	858.238	244.662		2223.61	1838.22	770.78		1648.81	1329.54	638.554		1940.97	1559.06	763.82		1715.73	1536.45	358.545		2274.84	1870.49	808.695		1597.31	1412.21	370.195		1351.54	1220.9	261.283		1911.98	1662.17	499.614		1111.71	818.5	586.411		1571.98	1230.66
1075.58	906.09	338.983						849.12	767.372	163.497		2179.5	1834.67	689.665		1411.8	1135.34	552.922		1631.96	1300.47	662.989		1477.02	1432	90.0482		2092.25	1724.03	736.443		1534.65	1368.64	332.019		1244.47	1127.82	233.298		1806.96	1579.77	454.37		1155.43	885.247	540.358		1349.5	1094.41
								839.469	734.138	210.661		2149.71	1763.78	771.867		1086.54	1040.53	92.014		1532.72	1204.76	655.925		1209.45	1202.88	13.1442		1942.75	1613.8	657.901		1430.55	1301.04	259.021		1164.54	1078.3	172.472		1691.17	1456.73	468.877		1151.56	872.917	557.291		1070.17	914.453
								782.384	699.536	165.696		1910.06	1648.06	523.999		921.921	960.263	-76.6838		1374.77	1059.96	629.63						1717.88	1513.45	408.873		1387.38	1206.85	361.062		1064.7	967.967	193.464		1616.96	1421.76			1053.49	803.569	499.833		826.68	734.917
								759.153	702.272	113.761		1653.35	1476.1	354.492		949.583	976.747	-54.3278		1059.49	839.237	440.503						1641.28	1381.99	518.592		1256.73	1143.9	225.668		994.727	860.993	267.468		1647.86	1441.49			1013	804.626	416.756		683.038	614.9
								780.787	704.79	151.993		1576.72	1455.24	242.958		771.07	731.704	78.7324		712.401	648.858	127.086						1529.1	1259.98	538.241		1096.23	1040.71	111.031		948.396	853.648	189.497		1552.36	1345.06			824.048	653.718	340.661		638.356	596.629
								781.705	732.233	98.9428		1533.83	1402.72	262.239						565.017	523.25	83.5334						1180.99	1039.14	283.712		943.054	953.025	-19.942		822.907	825.118	-4.4226		1449.6	1222.55			723.193	577.797	290.793		572.26	532.696
								637.992	605.822	64.3406		1528.71	1430.42	196.576						426.934	440.055	-26.243						983.352	888.096	190.512		828.888	827.657	2.4616						1330.8	1174.72			615.675	525.421	180.508
												1440.25	1401.72	77.0724														702.784	693.617	18.3338										1258.76	1141.39			517.551	462.103	110.895
												1339.91	1291.38	97.0644														598.391	585.465	25.8518										975.328	975.665			332.919	356.14	-46.4414
																												470.689	447.638	46.1032										862.091	848.635			289.769	314.522	-49.5044
																																								820.931	812.729
																																								630.8	658.181
[truncated: 328 more columns]
