# Supplementary material for: A stable microtubule bundle formed through an orchestrated multistep process controls quiescence exit
Source: eLife. 2024 Mar 25;12:RP89958. doi: 10.7554/eLife.89958 (PMC10963028; doi:10.7554/eLife.89958)
Supplement: Figure 1—source data 4. [file elife-89958-fig1-data4.xlsx]

## Sheet: Feuil1
	Tub4 prolif	Tub4 T0	Tub4 T2	Tub4 4h	Tub4 +11h	Tub4 +30h	Tub4 +48h	Tub4 +88h	Tub4 +96h		Y12182																																				Y12182
n=	90	128	132	186	114	222	122	68	181		Tub4 prolif				Tub4 T0				Tub4 T+2h				Tub4 T+4h				Tub4 +11h				Tub4 +30h				Tub4 +40h				Tub4 +88h				Tub4 +96h				Tub4 prolif
Mean	103.236	151.836	158.148	165.612	188.984	197.375	217.732	222.059	230.831			n=	52			n=	64			n=	73			n=	67			n=	114			n=	106			n=	53			n=	68			n=	124			n=	38
SD	17.4567	27.4527	33.2686	27.1546	39.0166	44.48	46.375	62.2803	53.9647		SD	MEAN			SD	MEAN			SD	MEAN			SD	MEAN			SD	MEAN			SD	MEAN			SD	MEAN			SD	MEAN			SD	MEAN			SD	MEAN
T-test	2.71298e-38	0.0960274	0.0407608	1.28934e-07	0.0240507	0.000337005	0.617578	0.307296			16.6397	101.791			29.023	151.915			30.0096	161.289			26.4359	168.878			39.0166	189.303			48.339	201.853			43.5693	213.631			62.2541	223.153			55.2381	220.852			18.4763	105.118
	86.8422	151	140	147	152.888	203.544	196.413	149	263		0.416	897.04	86.8422		0.416	1315.52	150.895		0.416	1278.48	140.237		0.416	1194.8	146.742		0.416	1280.24	152.888		0.416	1584.16	203.544		0.416	1658.24	255.797		0.416	1453.12	148.695		0.416	1774.44	262.517		0.416	981.32	123.692
	116.522	140	189	132	175.918	207.755	306.414	165	202		2.596	721.737			3.728	993.268			3.994	976.483			6.656	864.102			2.596	971.615			3.495	1153.11			4.243	1103.63			4.976	1125.56			4.809	1197.98			3.029	724.819
	106.432	148	170	153	159.407	137.174	223.256	257	220		0.416	1066.64	116.522		0.416	1345.48	140.255		0.416	1385.16	189.14		0.416	1177.92	132.022		0.416	1340.8	175.918		0.416	1516.92	207.755		0.416	1960.64	368.036		0.416	1468.04	165.382		0.416	1598.48	201.937		0.416	890.44	83.8887
	78.1388	150	238	153	145.773	185.565	277.561	243	300		4.793	810.851			2.563	1063.05			4.743	970.375			7.588	877.958			2.812	980.479			5.092	1058.31			6.956	1128.85			4.543	1106.89			3.728	1167.22			2.995	716.794
	98.8104	144	220	214	192.937	238.071	225.191	153	242		0.416	1026.64	106.432		0.416	1324.4	148.123		0.416	1355.44	169.645		0.416	1253.8	153.221		0.416	1281.52	159.407		0.416	1315.84	137.174		0.416	1402.08	171.22		0.416	1717.16	257.476		0.416	1561.6	219.577		0.416	1018.56	137.702
	100.107	117	173	172	169.156	186.897	255.098	152	198		3.961	797.664			4.26	1003.11			5.392	979.102			2.995	936.639			3.728	941.089			3.744	1022.73			5.059	1024.34			5.375	1146.13			2.796	1112.3			4.526	717.971
	86.9078	138	208	132	230.802	161.908	174.068	191	356		0.416	928.08	78.1388		0.416	1375.12	150.433		0.416	1525.28	237.612		0.416	1244.68	153.16		0.416	1239.56	145.773		0.416	1428.12	185.565		0.416	1569.32	215.626		0.416	1639.4	243.163		0.416	1832.04	300.095		0.416	941.12	105.269
	104.433	175	217	190	172.921	173.267	189.635	213	158		2.596	770.346			4.526	1046.74			6.224	992.273			4.526	910.346			3.245	934.067			3.994	1028.51			5.591	1089.55			3.678	1120.99			2.596	1226.26			3.029	722.824
	92.0938	161	190	190	123.983	177.914	165.145	266	257		0.416	1021.92	98.8104		0.416	1334.72	144.385		0.416	1489.2	219.626		0.416	1463.04	213.898		0.416	1389.44	192.937		0.416	1523.28	238.071		0.416	1422.16	165.406		0.416	1422.28	153.321		0.416	1647.28	241.96		0.416	913.68	101.785
	79.1771	161	114	199	159.946	154.175	221.89	259	206		3.495	812.667			3.262	1031.9			3.262	1028.58			3.994	1002.42			3.029	989.346			3.894	1012.13			3.112	1077.7			4.743	1086.05			2.663	1156.51			3.994	694.488
	93.4979	169	159	200	239.748	160.431	240.218	164	180		0.416	1022.12	100.107		0.416	1211.76	117.145		0.416	1354.4	173.373		0.416	1369.68	171.545		0.416	1315.48	169.156		0.416	1383.8	186.897		0.416	1454.16	186.599		0.416	1390.84	152.443		0.416	1515.76	198.202		0.416	886.48	85.2236
	90.4635	119	168	170	178.167	160.901	269.149	154	223		3.994	806.542			3.728	961.585			4.243	978.498			3.994	1000.26			3.678	954.846			1.082	1107.26			3.994	1052.33			3.728	1065.28			4.26	1085.84			3.495	706
	92.516	159	140	172	154.299	179.801	215.949	160	187		0.416	860.28	86.9078		0.416	1263.68	137.779		0.416	1451.16	208.033		0.416	1260.44	132.181		0.416	1493.72	230.802		0.416	1362.84	161.908		0.416	1652.68	258.409		0.416	1494.76	191.229		0.416	1955.28	355.652		0.416	1048.16	152.675
	98.2045	114	177	151	153.975	180.111	219.295	205	210		5.392	667.485			4.526	962.923			4.526	997.044			4.243	973.851			5.242	982.937			2.596	1036.01			3.245	1111.14			4.243	1080.14			4.892	1173.05			4.526	714.886
	90.9054	201	150	163	141.981	164.753	171.024	160	327		0.416	962.68	104.433		0.416	1314.56	174.631		0.416	1465.32	216.626		0.416	1377.48	189.741		0.416	1361.36	172.921		0.416	1377.88	173.267		0.416	1418.16	167.658		0.416	1536.2	213.394		0.416	1489.56	158.098		0.416	934.72	119.691
	97.405	206	152	172	209.121	150.237	167.553	268	264		3.744	739.533			3.461	945.231			5.691	982.649			6.324	951.376			2.995	1003.42			5.059	995.622			4.743	1050.48			3.678	1081.25			3.495	1154.75			3.495	681.248
	102.473	176	162	145	98.1796	153.377	127.002	180	210		0.416	872.28	92.0938		0.416	1216.76	160.984		0.416	1397.56	190.015		0.416	1384.56	189.621		0.416	1210.08	123.983		0.416	1371.92	177.914		0.416	1364.48	156.502		0.416	1646.96	265.605		0.416	1647.28	257.275		0.416	965.56	134.46
	87.1171	149	109	157	170.545	173.399	171.435	128	178		2.812	683.651			3.744	872.778			3.961	988.765			6.29	958.886			3.744	945.16			1.997	1033.33			6.956	1010.77			4.759	1064.3			2.796	1120.85			3.994	676.004
	80.3345	116	132	187	305.869	207.4	254.006	307	185		0.416	855.8	79.1772		0.416	1276.2	160.925		0.416	1074.72	113.515		0.416	1424.64	199.26		0.416	1303.56	159.946		0.416	1314.84	154.175		0.416	1504	213.549		0.416	1640.36	259.004		0.416	1582.48	206.225		0.416	954.92	112.538
	121.406	164	127	179	165.019	255.308	140.364	227	320		3.029	691.61			5.375	919.3			4.793	825.531			5.392	982.605			3.195	969.135			4.26	980.418			4.793	1035.21			4.493	1075.4			3.195	1151.29			4.194	711.23
	108.21	114	149	194	173.939	249.04	187.7	154	338		0.416	926.64	93.4979		0.416	1300.84	168.942		0.416	1250.4	159.483		0.416	1445.12	199.639		0.416	1539.92	239.748		0.416	1302.56	160.432		0.416	1464.6	195.241		0.416	1411.04	163.576		0.416	1587.96	179.938		0.416	897.56	95.5139
	107.009	121	157	204	175.679	317.506	174.636	165	191		3.029	732.753			2.596	959.808			3.678	910.389			4.243	1012.27			4.809	1013.46			3.594	961.546			3.728	1047.64			3.961	1059.13			2.197	1237.32			3.728	693.58
	103.944	131	183	189	232.181	209.212	168.975	201	202		0.416	937.44	90.4635		0.416	1192.04	118.578		0.416	1317.12	167.987		0.416	1354.08	170.322		0.416	1364.04	178.167		0.416	1315.32	160.901		0.416	1762.8	300.443		0.416	1432.72	154.307		0.416	1566.6	222.928		0.416	969.84	116.735
	89.0718	151	150	184	224.026	199.247	132.668	200	230		2.596	754.827			4.793	931.736			6.29	940.011			4.526	982.283			3.994	980.362			3.245	978.123			3.994	1115.8			4.26	1098.01			2.596	1116.59			4.793	713.583
	97.1866	108	241	157	168.898	217.558	227.09	217	282		0.416	938.52	92.516		0.416	1268.6	159.483		0.416	1217.08	140.179		0.416	1356.16	172.084		0.416	1290.8	154.299		0.416	1411.4	179.801		0.416	1612.88	247.583		0.416	1413.84	159.574		0.416	1549.32	186.684		0.416	953.64	110.657
	102.839	114	158	170	215.692	226.993	194.237	201	151		3.245	744.636			4.194	923.254			5.941	903.706			3.994	985.583			6.224	944.679			3.744	1027.21			2.929	1102.26			6.224	1055.89			3.495	1153.98			5.325	708.419
	116.574	101	119	176	183.358	100.596	225.51	175	296		0.416	1009.68	98.2045		0.416	1178.08	114.234		0.416	1295.4	177.087		0.416	1239.92	151.064		0.416	1302.32	153.975		0.416	1372	180.111		0.416	1436.84	176.173		0.416	1586.6	205.405		0.416	1537.88	209.658		0.416	887	107.844
	116.418	232	193	209	268.336	112.132	191.224	241	250		3.029	806.033			3.461	936.486			5.092	904.487			4.793	908.302			3.495	976.243			3.844	985.896			4.526	1052.27			4.526	1138.22			2.247	1127.2			3.262	660.821
	118.405	166	186	208	150.845	161.772	229.673	190	242		0.416	982.72	90.9054		0.416	1417.48	201.421		0.416	1241.2	149.946		0.416	1257.56	163.123		0.416	1250.8	141.981		0.416	1334.32	164.753		0.416	1672.08	276.928		0.416	1399.52	160.007		0.416	1863.88	327.377		0.416	874.92	102.559
	109.935	166	165	171	272.213	194.838	244.559	224	362		4.493	784.43			3.994	983.725			2.163	950.077			4.526	901.478			4.194	943.353			6.124	965.182			5.059	1061.13			3.894	1055.98			2.929	1188.69			2.796	665.065
	109.966	185	132	154	150.219	193.537	218.168	202	210		0.416	1000.08	97.405		0.416	1417.48	205.913		0.416	1240.28	152.26		0.416	1291.44	171.889		0.416	1472.08	209.121		0.416	1288.4	150.237		0.416	1698.92	297.65		0.416	1775.92	267.953		0.416	1690.92	263.797		0.416	868.36	95.9943
	84.9322	141	156	163	240.528	152.477	212.333	282	199		3.461	794.077			4.243	971.027			5.658	901.182			4.26	918.594			3.495	1029.22			3.195	974.276			7.988	1020.68			3.994	1198.89			2.197	1176.86			3.744	663.244
	116.775	143	183	159	214.874	177.031	217.256	323	162		0.416	1009.4	102.473		0.416	1369.28	176.195		0.416	1264.44	162.489		0.416	1207.32	145.336		0.416	1162.92	98.1796		0.416	1296.96	153.377		0.416	1431.24	179.329		0.416	1543.16	179.904		0.416	1580.84	210.052		0.416	897.48	99.4303
	92.0742	181	182	184	169.339	208.604	199.728	192	146		3.029	796.901			3.461	996.644			5.242	904.838			4.26	892.07			2.596	964.731			5.242	957.524			3.495	1051.47			3.029	1170.09			2.396	1163.58			3.744	685.022
	102.231	126	178	127	173.914	161.731	167.356	250	359		0.416	956.4	87.1171		0.416	1287.12	149.417		0.416	1121.36	108.514		0.416	1273.8	156.895		0.416	1329.28	170.545		0.416	1434.2	173.399		0.416	1347.4	167.145		0.416	1403.84	127.864		0.416	1520.4	177.951		0.416	902.12	101.934
	125.984	152	178	179	255.644	165.28	203.803	262	254		4.26	767.434			3.994	965.354			5.658	879.688			4.809	929.273			3.245	971.872			3.744	1063.69			3.495	993.433			3.029	1138.69			3.495	1143.55			3.495	686.252
	143.489	124	150	118	219.192	171.516	187.832	338	277		0.416	998.64	80.3345		0.416	1182.84	116.495		0.416	1156.12	131.872		0.416	1335.84	186.545		0.416	1665.32	305.869		0.416	1479.88	207.4		0.416	1354.8	170.953		0.416	1841.28	306.954		0.416	1448.56	185.405		0.416	843.24	77.5111
	118.331	162	150	141	178.536	127.665	178.781	189	282		3.994	825.642			5.375	924.477			4.194	870.563			3.994	934.121			3.395	1020.15			3.994	1033.25			3.245	996.538			4.793	1167.45			3.495	1055.92			3.029	682.505
	132.513	113	147	190	133.625	146.381	302.383	236	187		0.416	1099.08	121.406		0.416	1287.12	163.672		0.416	1105.96	127.448		0.416	1333.64	179.156		0.416	1317.6	165.019		0.416	1562.2	255.308		0.416	1469.32	229.669		0.416	1649.64	226.517		0.416	1795.88	320.18		0.416	843.32	78.5767
	140.289	200	193	174	149.284	178.708	268.645	245	211		4.243	835.851			5.092	925.82			5.059	824.786			5.092	938.16			4.243	959.812			2.08	1071.22			3.029	993.055			6.324	1140.95			4.493	1097.48			4.26	672.879
	94.1308	145	159	194	134.962	162.24	350.291	186	216		0.416	1068.28	108.21		0.416	1184	114.345		0.416	1170.76	149.4		0.416	1323.88	193.906		0.416	1355.88	173.939		0.416	1612.32	249.04		0.416	1372.6	176.088		0.416	1434.08	153.899		0.416	1810.76	338.342		0.416	912.84	105.046
	103.858	218	147	254	212.653	219.333	282.276	286	117		3.994	835.254			4.526	934.397			3.728	851.701			4.526	900.603			2.929	997.142			6.507	1051.94			3.495	999.695			3.029	1114.94			5.991	1053.91			3.744	688.382
	92.0382	150	136	174	144.538	131.645	225.01	142	165		0.416	1044.76	107.009		0.416	1222.64	121.094		0.416	1183.28	157.151		0.416	1369.8	204.04		0.416	1346.64	175.679		0.416	1824.84	317.506		0.416	1307.36	153.12		0.416	1435.8	164.895		0.416	1494.84	190.737		0.416	851.32	86.0241
	100.011	129	145	166	107.096	196.291	262.582	188	289		2.396	832.188			3.029	971.527			5.941	831.964			5.092	919.389			5.375	957.019			5.059	1124.37			3.728	980.357			5.325	1070.38			3.461	1091.45			3.245	671.041
	79.0484	133	147	166	195.512	225.237	178.153	236	203		0.416	1021.44	103.944		0.416	1240.52	130.548		0.416	1297.64	183.001		0.416	1346.84	188.992		0.416	1554.88	232.182		0.416	1483.16	209.212		0.416	1326.68	178.23		0.416	1541.72	201.167		0.416	1494.84	201.917		0.416	974.68	131.152
	72.4719	152	182	116	151.291	221.658	188.562	266	243		2.596	811.615			3.245	966.933			4.427	899.071			4.243	937.075			3.262	1067.93			4.992	1022.16			3.495	949.238			5.591	1094.12			3.461	1067.8			5.658	682.591
	116.816	174	239	142	189.359	192.356	219.053	207	184		0.416	1029.8	89.0718		0.416	1255.44	151.005		0.416	1208.04	150.32		0.416	1334.92	183.51		0.416	1481.24	224.026		0.416	1456.76	199.247		0.416	1473.28	215.195		0.416	1556.16	200.288		0.416	1646.28	229.919		0.416	974.68	131.086
	76.8315	163	147	122	123.283	308.912	191.082	374	223		2.796	847.542			4.809	923.848			5.658	873.262			3.744	942.804			3.728	1002.81			2.995	1044.33			3.112	1025.13			6.64	1104.86			5.691	1133.99			2.596	710.064
	82.3903	140	124	189	181.378	197.03	164.31	205	296		0.416	1017.2	97.1866		0.416	1177.36	108.168		0.416	1435.48	241.234		0.416	1257.04	157.146		0.416	1324.36	168.898		0.416	1525.48	217.558		0.416	1360.2	166.88		0.416	1574.52	217.077		0.416	1723.8	282.335		0.416	875.32	82.0383
	87.6432	159	148	193	200.417	299.688	176.321	142	253		3.262	813.372			2.197	966.576			5.392	900.33			3.495	924.248			4.526	955.673			3.245	1069.55			3.495	1006.79			4.793	1097.99			2.796	1146.09			3.961	698.824
	134.411	155	126	198	138.119	148.779	189.718	296	227		0.416	1058.84	102.839		0.416	1151.44	114.106		0.416	1231.56	158.019		0.416	1282.68	170.082		0.416	1463.28	215.692		0.416	1557.96	226.993		0.416	1531.84	253.431		0.416	1541.72	201.316		0.416	1388.44	151.486		0.416	942.48	116.778
	98.565	157	158	180	185.228	313.889	219.208	287	284		3.029	845.582			4.194	904.353			5.325	881.381			5.392	905.373			5.059	987.424			2.396	1107.04			3.728	990.612			5.325	1095.59			6.324	1048.24			5.658	682.403
	123.692	210	135	166	158.68	190.74	220.904	178	245		0.416	1071.36	116.574		0.416	1164.16	101.476		0.416	1113.48	119.002		0.416	1310.12	176.419		0.416	1366.64	183.358		0.416	1173.32	100.596		0.416	1413.4	217.378		0.416	1438.52	175.087		0.416	1787.76	295.778		0.416	933.4	124.181
	83.8887	152	140	188	203.117	312.213	288.132	352	285		3.994	820.321			5.059	940.286			5.092	850.788			4.26	927.449			6.989	952.11			3.245	962.503			2.746	970.018			3.994	1061.47			5.991	1126.12			3.994	665.979
	137.702	182	149	151	124.533	322.653	192.698	230	201		0.416	1007.32	116.418		0.416	1485.84	231.872		0.416	1311.92	193.063		0.416	1384.08	209.006		0.416	1609.6	268.336		0.416	1267.52	112.132		0.416	1518.32	233.606		0.416	1595.48	240.878		0.416	1638.64	250.034		0.416	860.88	99.1143
	105.269	106	128	169	225.351	220.501	208.6	206	279		2.796	769.107			8.038	957.302			4.493	890.796			6.29	914.889			5.691	1011.71			2.596	1041.17			4.809	1005.34			4.809	1066.54			4.243	1096.53			3.961	647.647
	101.785	106	184	175	195.045	191.436	218.011	213	279		0.416	1043.32	118.405		0.416	1288.6	166.057		0.416	1269.16	185.644		0.416	1370.16	207.974		0.416	1276.44	150.845		0.416	1285.32	161.772		0.416	1350.04	181.77		0.416	1523.44	189.554		0.416	1645.48	242.26		0.416	871.24	98.1609
	85.2236	136	188	172	186.23	154.553	246.273	210	286		3.495	792.571			4.526	926.114			7.322	848.255			3.961	922.727			4.243	949.384			2.796	954.304			4.526	953.254			3.994	1115.24			5.325	1108.62			3.728	661.607
	152.675	196	132	137	151.198	158.792	175.189	317	199		0.416	1105.36	109.935		0.416	1269.72	166.483		0.416	1250.2	164.667		0.416	1286.64	171.068		0.416	1640.2	272.213		0.416	1385.56	194.838		0.416	1486.48	209.529		0.416	1583.76	224.096		0.416	2014.28	362.194		0.416	856.32	92.6002
	119.691	161	183	183	262.238	226.909	181.66	139	213		2.796	880.411			3.961	911.55			5.392	884.904			3.744	921.111			3.262	1069.29			3.994	965.983			4.526	1029.1			3.495	1109.19			5.658	1207.63			6.324	648.366
	134.46	135	187	118	175.224	205.941	264.403	229	292		0.416	1079.12	109.967		0.416	1308.68	185.335		0.416	1221.64	132.457		0.416	1243.04	153.768		0.416	1298.84	150.219		0.416	1418.6	193.537		0.416	1509.48	226.277		0.416	1509.2	202.402		0.416	1553.12	210.444		0.416	840.44	83.5405
	112.538	154	180	149	215.067	222.132	182.8	168	226		3.029	851.082			6.64	891.075			4.743	931.161			3.744	914.476			7.322	958.252			4.493	996.441			3.961	1022.67			5.375	1060.31			3.961	1100.37			4.493	658.215
	95.5139	167	106	186	244.141	150.849	206.8	208	171		0.416	996.12	84.9322		0.416	1183.96	140.561		0.416	1290.72	156.247		0.416	1251	163.081		0.416	1543.64	240.528		0.416	1266.76	152.477		0.416	1383.76	178.086		0.416	1690.64	281.858		0.416	1556.12	199.117		0.416	838.2	79.221
	116.735	150	156	128	158.347	183.999	244.424	250	226		3.994	813.221			5.392	872.142			4.427	950.421			3.728	902.723			3.994	1025.67			3.461	944.284			4.493	995.304			6.507	1056.41			6.507	1108.07			3.994	667.6
	110.657	144	163	135	212.335	185.675	252.685	459	325		0.416	1106.16	116.775		0.416	1278.76	142.588		0.416	1371.88	183.07		0.416	1229.04	158.681		0.416	1415.24	214.874		0.416	1328.16	177.031		0.416	1449.2	211.639		0.416	1824.92	322.624		0.416	1471.04	161.876		0.416	873.68	102.581
	107.844	159	135	162	184.18	175.515	256.309	255	148		3.744	856.64			4.743	966.063			3.728	980.915			4.26	884.844			5.375	938.693			2.929	963.045			4.793	984.608			10.334	1080.6			3.029	1135.36			4.243	651.267
	102.559	201	151	150	211.264	225.539	227.649	170	157		0.416	1011.24	92.0742		0.416	1385.72	180.668		0.416	1371.88	181.551		0.416	1328.68	183.69		0.416	1344.08	169.339		0.416	1367.24	208.604		0.416	1623.92	257.057		0.416	1571.44	192.296		0.416	1401.72	145.852		0.416	904.44	113.799
	95.9943	159	128	151.818	201.756	137.339	217.198	213	259		3.245	818.282			5.991	981.578			3.961	981.294			3.262	943.429			3.245	989.2			3.245	930.072			6.29	1046.86			7.588	1134.53			3.678	1090.77			4.526	656.029
	99.4303	126	189	165.961	203.478	174.955	247.309		166		0.416	1072.64	102.231		0.416	1253.32	125.878		0.416	1323.36	178.167		0.416	1171.96	126.818		0.416	1348.44	173.914		0.416	1255.2	161.731		0.416	1419.32	190.235		0.416	1703.52	250.203		0.416	1981.92	358.687		0.416	892.04	114.839
	101.934	166	164	195.295	210.112	121.753	286.396		195		2.563	866.779			7.655	967.172			4.793	932.247			5.375	890.703			4.243	971.365			5.092	898.186			5.059	999.628			6.007	1143.72			3.245	1230.23			5.691	636.164
	77.511	148	119	221.68	132.538	189.218	193.319		325		0.416	1139.76	125.984		0.416	1344.88	152.458		0.416	1293.4	177.924		0.416	1321.28	178.623		0.416	1576.52	255.644		0.416	1288.64	165.28		0.416	1401.84	191.274		0.416	1751.64	261.578		0.416	1695.76	254.132		0.416	803.88	80.4734
	78.5767	167	164	157.62	193.374	205.536	183.828		124		3.744	870.564			3.728	1019.29			6.29	893.984			5.658	923.468			3.461	1035.86			2.796	950.446			5.858	974.699			6.007	1166.39			2.995	1169.72			4.659	627.707
	105.046	219	128	178.174	164.198	178.05	251.93		232		0.416	1168.76	143.489		0.416	1260.24	123.569		0.416	1234.92	149.652		0.416	1185.2	117.828		0.416	1469.16	219.192		0.416	1266.28	171.516		0.416	1488.68	214.729		0.416	1962.12	337.521		0.416	1757.4	277.476		0.416	885.4	118.875
	86.0241	161	145.673	153.407	219.573	234.648	196.124		171		4.793	853.771			5.059	987.625			6.889	896.903			4.243	929.729			6.64	975.268			3.495	903.057			3.994	1026.27			6.64	1201.6			2.796	1189.63			4.526	625.908
	131.152	143	161.508	154.405	201.367	168.087	233.919		205		0.416	1090.76	118.331		0.416	1357	162.154		0.416	1248.6	149.777		0.416	1252.44	141.174		0.416	1397.6	178.536		0.416	1173.36	127.664		0.416	1420.52	175.371		0.416	1585.08	189.34		0.416	1727.08	281.69		0.416	836.36	109.856
	131.086	160	123.482	205.477	252.625	235.014	185.911		231		4.243	834.2			4.26	1005.27			3.495	931.414			5.092	940.804			2.812	1031.92			3.728	900.719			5.591	1030.32			7.588	1154.89			5.691	1099.44			4.493	596.733
	82.0383	163	153.09	161.963	225.593	263.509	281.482		168		0.416	1156	132.513		0.416	1277.04	112.551		0.416	1233.52	146.637		0.416	1387.68	190.232		0.416	1202.32	133.625		0.416	1188.2	146.381		0.416	1761.28	315.324		0.416	1696.88	236.157		0.416	1442.88	186.544
	116.778	193	141.732	202.239	182.113	286.615	184.376		192		4.26	868.566			3.029	1043.64			4.526	913.426			6.64	959.04			3.994	914.562			4.526	868.665			5.092	1065.22			7.272	1161.67			3.461	1048.36
	124.181	202	135.566	130.232	211.336	271.623	286.726		141		0.416	1152.16	140.289		0.416	1463.6	199.559		0.416	1404.56	193.315		0.416	1345.96	174.057		0.416	1286.36	149.284		0.416	1285.12	178.708		0.416	1519.72	206.052		0.416	1746.8	245.082		0.416	1460.48	211.351
	99.1143	176	143.04	173.193	147.824	266.139	179.352		176		3.728	852.558			7.655	1009.96			5.375	975.827			5.941	956.852			3.728	967.549			3.245	910.605			5.375	1062.74			5.059	1206.11			4.526	999.121
	98.1609	183	175.429	169.379	145.262	250.714	205.992		171		0.416	980.8	94.1308		0.416	1337.52	144.578		0.416	1313.92	158.509		0.416	1405.2	194.316		0.416	1203.48	134.962		0.416	1266.96	162.24		0.416	1482.4	203.888		0.416	1599.96	186.257		0.416	1459.76	215.78
	92.6002	209	114.901	140.634	200.911	166.091	226.151		173		3.495	781.457			3.495	1031.34			5.325	962.656			5.092	976.255			3.728	915.254			3.029	930.522			4.21	1040.71			3.495	1205.52			3.112	1010.4
	83.5405	210	117.317	151.066	200.16	178.887	242.032		262		0.416	1027.24	103.858		0.416	1500.2	217.615		0.416	1258.6	146.702		0.416	1562.52	253.936		0.416	1427.36	212.653		0.416	1426.04	219.333		0.416	1504.64	214.057		0.416	1808.48	286.267		0.416	1262.28	117.345
	79.221	137	135.84	109.758	175.404	138.347	475.53		161		4.526	800.529			4.493	1025.52			4.194	940.929			5.991	994.483			4.793	960.542			6.324	933.479			4.526	1037.38			8.786	1152.92			4.493	1006.32
	102.581	151	321.695	212.617	164.73	133.372	226.961		239		0.416	1003.8	92.0382		0.416	1342.56	150.234		0.416	1251.44	135.718		0.416	1362.04	174.055		0.416	1259.04	144.539		0.416	1203.64	131.645		0.416	1532.96	222.899		0.416	1468.96	141.929		0.416	1393.32	165.267
	113.799	150	142.237	156.732	187.414	207.693	268.738		197		3.029	812.94			5.991	1006.5			4.793	953.51			3.994	987.217			5.092	939.977			2.197	947.106			2.829	1075.93			4.526	1159.14			3.728	1040.38
	114.839	166	146.474	181.39	165.706	215.307	215.711		215		0.416	917.92	100.011		0.416	1257.36	128.914		0.416	1231.4	145.429		0.416	1337.92	166.457		0.416	1167.52	107.096		0.416	1402.96	196.291		0.416	1468.84	193.531		0.416	1541	187.92		0.416	1770.88	289.272
	80.4734	168	163.959	184.809	187.527	216.719	226.772		223		3.245	708.328			5.092	972.788			4.992	910.943			5.691	967.032			3.029	945.434			3.728	983.759			3.794	1054.63			6.59	1117.79			4.194	1144.49
	118.875	127	124.411	149.51	240.504	232.196	245.155		273		0.416	874.56	79.0484		0.416	1258.12	132.687		0.416	1260.96	146.676		0.416	1305.12	166.067		0.416	1408	195.512		0.416	1477.04	225.237		0.416	1511.68	205.351		0.416	1673.76	235.659		0.416	1539.52	202.927
	109.856	140	176.978	190.334	182.308	245.314	208.397		309		3.029	710.637			3.744	974.6			4.493	941.019			6.224	932.602			4.26	983.914			3.245	1005.01			2.563	1098.17			4.26	1162.59			3.495	1109.78
		110	149.647	164.999	196.771	290.173	250.72		243		0.416	848	72.4719		0.416	1266.04	152.267		0.416	1363.36	182.367		0.416	1158.56	116.161		0.416	1285.2	151.291		0.416	1462.2	221.658		0.416	1362.48	170.777		0.416	1759.52	265.915		0.416	1580.76	243.08
		118	107.422	126.798	267.036	260.923	173.461		173		4.526	689.801			2.247	967.778			5.059	961.026			4.793	903.562			3.994	959.4			3.495	992.79			4.659	988.614			5.658	1167.3			2.812	1082.88
		134	109.316	140.902	144.599	214.424	174.773		162		0.416	1025.12	116.816		0.416	1335.36	173.802		0.416	1491.12	239.249		0.416	1243.04	141.954		0.416	1409.16	189.359		0.416	1492.2	192.355		0.416	1567.36	231.746		0.416	1580.24	206.884		0.416	1401.16	184.483
		158	127.712	148.254	158.541	309.037	259.244		229		4.26	771.734			4.526	955.967			6.59	952.308			3.245	945.549			3.262	1012.02			3.461	1085.38			3.495	1076.59			5.242	1122.39			3.495	1010.48
		124	123.52	155.95	200.609	195.863	228.895		203		0.416	924.48	76.8315		0.416	1330.44	162.75		0.416	1241.24	146.845		0.416	1210.2	122.344		0.416	1221.84	123.283		0.416	1710.6	308.912		0.416	1466.24	216.354		0.416	2022.2	373.826		0.416	1647.04	222.945
		133	112.75	120.571	195.129	232.754	279.199		129		2.796	767.268			4.493	975.437			2.596	944.814			4.493	943.333			3.994	956.354			4.526	1036.28			7.072	976.751			5.408	1192.7			3.594	1173.15
		104	154.392	168.372	152.392	221.132	127.613		139		0.416	930.6	82.3903		0.416	1284.36	139.648		0.416	1190.64	123.818		0.416	1387.8	188.603		0.416	1399.64	181.378		0.416	1423.84	197.03		0.416	1585.56	248.834		0.416	1616.76	204.971		0.416	1790.72	295.695
		117	110.059	174.498	181.501	213.167	164.676		185		3.994	753.175			3.961	983.924			3.728	926.214			5.092	971.467			3.678	1012.95			3.029	1015.26			3.994	1049.7			3.295	1186.25			4.243	1149.6
		140	124.061	177.75	185.775	256.22	232.843		204		0.416	964.52	87.6433		0.416	1319.04	159.374		0.416	1263.4	148.256		0.416	1379.92	193.014		0.416	1405.48	200.417		0.416	1759.12	299.688		0.416	1529.96	205.677		0.416	1453.88	141.562		0.416	1649.28	252.853
		104	106.78	205.957	207.002	198.98	215.285		163		2.38	790.664			5.691	963.933			3.245	952.703			5.392	951.741			4.26	970.754			3.994	1113.75			2.812	1108.69			4.892	1142.52			4.526	1097.33
		141	127.67	187.147	234.857	255.743	190.458		275		0.416	1099.84	134.411		0.416	1307.68	155.403		0.416	1154.96	125.508		0.416	1411.88	198.079		0.416	1246.12	138.119		0.416	1420.76	148.779		0.416	1544.4	223.537		0.416	1847.16	295.527		0.416	1613.2	226.609
		135	101.389	200.216	230.819	214.015	179.132		313		3.495	815.195			4.543	968.322			4.243	882.839			3.245	996.769			3.195	957.333			3.728	1103.03			3.461	1071.64			4.194	1207.22			3.461	1133.94
		160	103.433	152.173	213.967	205.778	261.292		326		0.416	1012.92	98.565		0.416	1307.68	156.906		0.416	1232.56	158.399		0.416	1396.88	180.366		0.416	1368.44	185.228		0.416	1856.6	313.889		0.416	1611.56	257.803		0.416	1813.08	286.926		0.416	1723.92	284.497
		158	129.921	255.609	186.49	146.159	221.25		214		3.728	802.424			6.64	954.133			4.743	885.189			4.793	1000.94			5.059	959.793			4.526	1171.41			6.124	1033.94			6.224	1169.45			3.961	1111.86
		151	152.992	161.084	240.536	212.623	190.674		215						0.416	1465.8	210.424		0.416	1208.28	135.101		0.416	1351.28	165.798		0.416	1300.04	158.68		0.416	1458.72	190.74		0.416	1554.96	218.95		0.416	1547.04	178.124		0.416	1603.92	245.151
		169	149.991	149.59	265.693	225.682	193.632		188						5.059	1001.57			3.262	924.934			4.743	987.684			5.059	949.964			3.495	1054.79			5.092	1071.64			5.059	1154.07			3.112	1093.39
		135	170.353	199.273	182.09	197.259	211.318		215						0.416	1308.44	152.195		0.416	1208.32	140.09		0.416	1397.64	188.281		0.416	1306.72	203.117		0.416	1875	312.213						0.416	1959.12	351.934		0.416	1717.32	285.214
		134	140.484	195.652	217.409	228.605	203.07		202						5.059	972.671			3.728	909.143			4.793	984.323			4.243	866.329			5.242	1184.05							5.658	1175.33			2.929	1129.09
		159	164.545	181.34	197.74	195.871	182.018		159						0.416	1387.16	182.307		0.416	1214.08	149.414		0.416	1321.68	151.324		0.416	1129.4	124.533		0.416	1833.48	322.653						0.416	1684.88	230.36		0.416	1497.36	200.996
		136	175.34	144.252	226.119	182.065	173.67		174						11.682	964.528			4.743	886.414			3.461	1001.64			3.994	861.221			3.245	1157.3							5.059	1176.66			3.994	1064.52
		144	166.56	171.706	159.53	213.04	236.623		206						0.416	1138.08	105.649		0.416	1203.76	127.505		0.416	1343	169.197		0.416	1409.64	225.351		0.416	1579.2	220.501						0.416	1619.2	205.731		0.416	1745.04	278.843
		140	197.016	121.788	146.601	185.119	199.2		269						5.092	904.863			4.427	926.06			3.744	981.467			4.526	917.721			2.796	1128.01							6.007	1158.9			1.864	1224.34
		122	151.738	130.611	169.444	201.244	182.278		184						0.416	1172.24	106.456		0.416	1361.72	184.388		0.416	1362.52	175.083		0.416	1368.44	195.045		0.416	1562.64	191.436						0.416	1623.24	212.99		0.416	1709.52	279.179
		150	179.492	156.135	265.91	158.54	260.377		154						5.059	937.378			4.194	962.444			3.728	988.612			3.994	948.417			3.295	1160.56							4.243	1161.44			2.696	1141.97
		160	173.341	155.825		162.597	172.211		212						0.416	1255.92	136.088		0.416	1394.92	188.312		0.416	1352.92	172.08		0.416	1339.72	186.23		0.416	1412.24	154.553						0.416	1643.08	209.65		0.416	1737.16	285.59
		122	199.868	160.615		214.497	198.262		233						3.495	967.724			4.809	981.405			5.392	971.179			3.994	938.679			2.995	1092.32							5.325	1178.48			5.125	1106.37
		181	137.698	146.133		177.199	292.802		190						0.416	1432.44	195.988		0.416	1208.36	131.511		0.416	1268.76	136.978		0.416	1229.52	151.198		0.416	1412.24	158.792						0.416	1926.52	317		0.416	1502.4	198.63
		174	217.218	160.432		173.35	236.315		234						5.059	1000.06			6.324	913.024			3.728	976.228			3.461	909.75			3.245	1079.46							4.743	1231.34			3.295	1085.21
		181	185.049	152.081		200.024	199.177		201						0.416	1333.72	161.122		0.416	1397.56	182.72		0.416	1352	183.459		0.416	1579.64	262.238		0.416	1545.68	226.909						0.416	1406.12	138.673		0.416	1557.52	213.045
		152	136.906	174.119		212.878	217.422		208						4.526	982.007			3.678	1008.01			6.29	940.159			2.746	1044.76			3.594	1063.36							5.991	1095.92			3.245	1111.05
		111	156.781	149.452		173.022	189.379		150						0.416	1268.56	135.407		0.416	1393.4	187.454		0.416	1186.84	117.505		0.416	1307.76	175.224		0.416	1567.64	205.941						0.416	1654.48	228.918		0.416	1802.92	292.087
		168	187.333	206.551		164.523	240.403		244						3.961	977.248			3.495	996.424			4.793	928.892			3.262	940.265			4.659	1116.79							6.656	1138.59			3.245	1190.8
		146	145.809	125.378		181.647			142						0.416	1296.56	154.275		0.416	1376.16	180.273		0.416	1290.56	149.302		0.416	1410.68	215.068		0.416	1566.04	222.132						0.416	1539.48	167.894		0.416	1575.04	225.607
		171	196.873	202.922		193.182			128						7.655	945.861			4.526	982.643			6.224	955.65			4.743	939.035			3.195	1101.59							3.994	1177.92			2.563	1120.74
		138	214.699	170.101		221.289			209.63						0.416	1347.92	167.153		0.416	1179.52	105.622		0.416	1363.84	185.774		0.416	1504.92	244.141		0.416	1388.08	150.849						0.416	1661.72	207.822		0.416	1490.48	171.301
		156	130.476	189.676		220.447			187.788						3.744	990.756			3.744	953.831			3.961	964.168			2.812	1004.86			2.596	1083.57							4.809	1205.36			2.396	1150.19
		121	170.909	142.895		205.512			223.846						0.416	1277.6	149.942		0.416	1315.2	156.34		0.416	1194.04	127.723		0.416	1251.12	158.347		0.416	1441.64	183.999						0.416	1724.8	250.299		0.416	1599.88	226.472
		131	179.203	160.281		176.129			295.068						4.243	952.502			4.493	974.178			4.427	915.865			3.994	910.125			3.678	1049.36							5.591	1167.89			4.243	1108.85
			175.699	132.277		157.062			315.746										0.416	1269.36	163.454		0.416	1217.96	134.945		0.416	1404.44	212.335		0.416	1441.64	185.675						0.416	2333.52	459.059		0.416	1759.84	324.835
			169.232	165.62		174.135			261.97										4.793	910.545			3.678	930.262			4.526	940.934			3.728	1045.11							3.728	1353.15			4.493	1051.29
			170.114	199.323		129.279			314.719										0.416	1205.68	134.738		0.416	1226.16	161.858		0.416	1346.12	184.18		0.416	1383.8	175.515						0.416	1739.28	255.429		0.416	1313.24	147.717
			216.37	143.379		157.902			332.781										3.728	917.933			4.26	875.074			4.243	946.788			3.262	1015.69							5.941	1168.26			3.245	1003.67
				130.82		178.144			288.543										0.416	1196.44	151.247		0.416	1211	150.497		0.416	1414.08	211.264		0.416	1564.8	225.539						0.416	1510.16	169.852		0.416	1420.8	157.176
				178.508		143.206			241.819										4.526	866.283			6.656	871.838			3.744	962.662			4.526	1072.47							5.325	1133.76			4.493	1077.96
				212.504		152.162			314.041										0.416	1169.2	127.63						0.416	1352.72	201.756		0.416	1188.88	137.339						0.416	1656.04	213.491		0.416	1639.32	259.145
				153.259		180.919			265.342										3.461	899.274							3.744	921.618			5.658	883.012							5.092	1184.77			3.744	1085.59
				146.897		136.028			220.243										0.416	1349.52	188.614						0.416	1354.36	203.478		0.416	1314.2	174.955										0.416	1445.44	166.214
				149.514		188.508			210.334										3.728	946.714							3.029	932.407			3.029	951.396											3.594	1092.13
				128.303		151.33			200.77										0.416	1267.68	164.127						0.416	1376.04	210.112		0.416	1126.08	121.753										0.416	1498.2	195.393
				165.867		175.855			328.268										4.493	909.674							2.995	941.117			2.995	874.056											2.995	1093.74
				167.473		243.418			329.939										0.416	1166.48	119.311						0.416	1158.56	132.538		0.416	1292.68	189.218										0.416	1846.72	324.675
				132.601		250.274			232.66										3.728	911.679							2.596	891.013			3.029	900.297											1.165	1344.94
				161.346		171.235			279.512										0.416	1289.12	164.437						0.416	1330.56	193.374		0.416	1350.2	205.536										0.416	1361.92	124.014
				147.744		196.4			176.845										3.961	935.353							3.461	921.591			3.245	919.462											3.195	1102.62
				139.717		225.878			213.923										0.416	1222.96	127.908						0.416	1169.28	164.198		0.416	1321.36	178.05										0.416	1672.92	231.914
				119.622		170.281			180.332										3.728	949.799							5.375	805.121			3.744	940.911											3.728	1177.64
				171.04		205.825			264.386																		0.416	1353.32	219.573		0.416	1509.4	234.648										0.416	1469.04	170.694
				173.378		196.222			259.028																		3.744	884.147			3.262	1017.28											2.812	1119.42
				164.586		193.581			194.063																		0.416	1340.84	201.367		0.416	1294.64	168.087										0.416	1574.52	204.635
				126.54		202.67			266.516																		3.029	923.264			3.744	935.48											5.941	1117.05
				129.516		228.677			305.952																		0.416	1464.32	252.625		0.416	1605.76	235.014										0.416	1632.72	230.853
				109.813		175.225			291.593																		5.591	902.232			5.325	1084.96											3.744	1139.44
				193.034		190.78			235.013																		0.416	1407.8	225.593		0.416	1677.68	263.509										0.416	1435.28	168.158
				184.731		278.054			175.329																		3.994	921.992			3.728	1114.93											2.796	1091.2
				174.146		197.302			219.372																		0.416	1256	182.113		0.416	1829.16	286.615										0.416	1485.84	192.337
				121.542		195.957			352.764																		3.994	863.825			4.493	1203.97											2.995	1087.71
				175.047		226.502			225.041																		0.416	1343.16	211.336		0.416	1703.56	271.623										0.416	1412.48	140.705
				210.072		176.485			299.148																		4.793	879.233			6.29	1093.8											2.796	1124.57
				182.606		212.648			181.503																		0.416	1139.6	147.824		0.416	1765.84	266.139										0.416	1498.28	176.192
				159.164		197.147			256.654																		4.526	816.915			2.995	1214.94											3.461	1125.65
				159.049		130.456			250.357																		0.416	1139.8	145.263		0.416	1730.36	250.714										0.416	1527.84	171.398
				210.931		212.192			240.43																		4.243	824.847			2.995	1211.39											3.495	1164.87
				193.74		296.491			229.804																		0.416	1457.76	200.911		0.416	1503.24	166.091										0.416	1668.24	173.154
				195.138		144.946			218.595																		3.994	1025.1			2.812	1163.05											3.029	1309.17
				186.548		166.051			276.384																		0.416	1410.04	200.16		0.416	1476.84	178.887										0.416	1782.92	261.885
				183.644		196.248			293.752																		3.029	994.967			2.846	1109.68											5.092	1204.82
				232.672		238.745			231.102																		0.416	1333.12	175.404		0.416	1376.64	138.347										0.416	1411.32	160.839
				229.407		196.909			233.592																		3.994	955.392			1.082	1171.94											4.427	1061.02
				203.835		183.211			230.29																		0.416	1331.2	164.73		0.416	1380.48	133.372										0.416	1616.44	238.574
				230.306		192.289			240.7																		3.994	976.458			1.082	1183.14											3.195	1117.62
				219.667		244.998			217.289																		0.416	1415.04	187.414		0.416	1546.2	207.693										0.416	1543.16	197.044
				167.435		248.582			253.873																		3.262	1021.98			2.929	1117.85											4.526	1113.03
				178.386		192.315			327.08																		0.416	1372.12	165.706		0.416	1532.16	215.307										0.416	1521.68	215.087
				173.69		175.073			261.085																		4.493	1010.67			1.082	1213.59											3.994	1058.5
				233.581		165.174			279.371																		0.416	1383.4	187.527		0.416	1566.52	216.719										0.416	1586.72	222.846
				191.114		171.733			234.354																		3.744	982.702			0.832	1306.04											3.728	1110.81
				173.512		261.569			274.153																		0.416	1504.32	240.504		0.416	1599.36	232.196										0.416	1746.8	272.561
				231.749		195.8			221.103																		4.243	982.867			2.929	1120.47											3.961	1160.42
				177.495		158.069			210.843																		0.416	1374.12	182.308		0.416	1636.72	245.314										0.416	1775.88	308.96
				148.614		164.586			271.065																		2.995	996.75			4.493	1101.62											5.408	1090.32
				128.337		218.762			211.745																		0.416	1404.44	196.771		0.416	1785	290.173										0.416	1575.52	242.663
				161.021		162.123																					4.427	975.88			2.396	1208.58											7.272	1025.57
				192.312		180.589																					0.416	1613.36	267.036		0.416	1740.92	260.923										0.416	1411.12	173.23
				163.11		145.909																					2.796	1066.95			3.245	1194.11											5.059	1028.94
				166.993		152.517																					0.416	1308.68	144.599		0.416	1633.2	214.424										0.416	1348.16	162.09
				204.238		210.451																					3.245	1005.65			3.495	1179.11											3.744	1001.81
						176.8																					0.416	1299.88	158.541		0.416	1840.56	309.037										0.416	1558.68	228.868
						222.813																					4.243	956.137			3.994	1175.06											3.245	1079.05
						173.805																					0.416	1386.24	200.609		0.416	1470.52	195.863										0.416	1509.6	202.992
						155.351																					7.322	931.405			2.812	1069.35											6.324	1053.74
						198.362																					0.416	1388.6	195.129		0.416	1650	232.754										0.416	1371.76	129.241
						207.18																					2.596	994.705			3.961	1149.26											3.245	1100.91
						165.544																					0.416	1304.84	152.392		0.416	1565.24	221.132										0.416	1382.6	139.407
						199.904																					3.262	985.23			3.994	1089.04											3.262	1090.22
						157.547																					0.416	1325.2	181.501		0.416	1527.24	213.167										0.416	1522.4	184.751
						150.996																					3.195	945.708			4.194	1065.65											3.245	1135.22
						175.983																					0.416	1373.04	185.775		0.416	1646.72	256.22										0.416	1549.96	203.508
						171.056																					3.961	973.366			3.994	1094.96											3.894	1113.02
						189.275																					0.416	1419.04	207.002		0.416	1416.48	198.98										0.416	1484.12	163.16
						260.039																					3.495	980.667			4.194	985.607											3.029	1145.78
						145.001																					0.416	1521.52	234.857		0.416	1617.32	255.743										0.416	1735.92	274.836
						271.759																					3.461	1024.82			5.375	1050.13											5.658	1123.83
						207.505																					0.416	1500.36	230.818		0.416	1485.84	214.015										0.416	1852.52	312.763
						190.269																					6.29	982.204			3.894	1026.34											5.991	1152.89
						197.157																					0.416	1421.48	213.967		0.416	1523.6	205.778										0.416	1926.32	326.459
						159.128																					4.743	952.249			3.661	1085.15											4.743	1210.39
						221.499																					0.416	1377.16	186.49		0.416	1316.16	146.159										0.416	1530.24	214.182
						258.996																					4.526	970.07			3.728	1004.02											4.26	1065.66
						224.259																					0.416	1518	240.536		0.416	1503.52	212.623										0.416	1530.24	215.451
						187.72																					3.994	1000.01			4.243	1042.52											4.743	1057.75
						235.522																					0.416	1556.52	265.693		0.416	1490.2	225.682										0.416	1475.48	188.124
						219.13																					8.786	948.076			1.165	1141.41											3.461	1077.62
						288.525																					0.416	1348.76	182.09														0.416	1525.52	215.309
						212.573																					5.092	946.804															6.324	1042
						213.895																					0.416	1516.96	217.409														0.416	1506.48	202.044
						221.7																					3.728	1052.66															4.243	1068.42
						240.031																					0.416	1459.56	197.74														0.416	1470.8	159.475
						251.255																					3.262	1044.84															2.596	1148.88
						192.664																					0.416	1523.92	226.119														0.416	1406.68	174.164
						251.112																					3.961	1037.45															4.793	1024.35
						408.954																					0.416	1302.4	159.529														0.416	1537.16	206.386
						216.046																					3.994	958.858															5.059	1081.84
																											0.416	1276.88	146.601														0.416	1670.56	269.133
																											4.26	958.887															5.858	1069.55
																											0.416	1344.96	169.444														0.416	1423.6	184.116
																											6.007	965.85															4.194	1024.91
																											0.416	1583.44	265.91														0.416	1355.88	154.084
																											4.526	1002.99															4.194	1022.23
																																											0.416	1529.24	212.002
																																											4.759	1064.17
																																											0.416	1522.08	232.963
																																											3.678	1025.41
																																											0.416	1421.36	190.311
																																											3.678	1015.62
																																											0.416	1523.4	234.364
																																											3.461	1027.74
																																											0.416	1698.28	201.332
																																											3.112	1279.01
																																											0.416	1682.56	207.977
																																											2.995	1252.06
																																											0.416	1345.96	150.138
																																											3.245	1031.32
																																											0.416	1594.2	243.797
																																											4.743	1059.55
																																											0.416	1275.16	142.035
																																											3.961	969.588
																																											0.416	1227.12	128.374
																																											6.224	939.155

## Sheet: Feuil2
			Y12182
			Tub4 prolif	Tub4 T0	Tub4 T2	Tub4 4h	Tub4 5h	Tub4 +11h	Tub4 +22h	Tub4 +30h	Tub4 +40h	Tub4 +48h	Tub4 +88h	Tub4 +96h
		n	90	128	132	127	59	114	54	106	169	122	68	181
		Mean	103.236	151.889	158.156	167.852	171.98	188.984	188.413	201.869	202.881	217.732	222.058	230.855
		SD	17.4567	27.4505	33.2904	27.0586	31.4963	39.0166	31.7971	48.339	41.4789	46.375	62.2541	53.9302
		T-tset		2.37306e-38	0.0985337	0.0105498		2.68965e-06		0.0315001		0.0125008	0.617513	0.305742
			90
			86.8422	150.895	140.237	146.742	160.281	152.888	239.707	203.544	255.797	196.413	148.695	262.517
			116.522	140.255	189.14	132.022	132.277	175.918	212.083	207.755	368.036	306.414	165.382	201.937
			106.432	148.123	169.645	153.221	165.62	159.407	178.159	137.174	171.22	223.256	257.476	219.577
			78.1388	150.433	237.612	153.16	199.323	145.773	199.546	185.565	215.626	277.561	243.163	300.095
			98.8104	144.385	219.626	213.898	143.379	192.937	193.619	238.071	165.406	225.191	153.321	241.96
			100.107	117.145	173.373	171.545	130.82	169.156	235.227	186.897	186.599	255.098	152.443	198.202
			86.9078	137.779	208.033	132.181	178.508	230.802	172.924	161.908	258.409	174.068	191.229	355.652
			104.433	174.631	216.626	189.741	212.504	172.921	198.77	173.267	167.658	189.635	213.394	158.098
			92.0938	160.984	190.015	189.621	153.259	123.983	206.645	177.914	156.502	165.145	265.605	257.275
			79.1772	160.925	113.515	199.26	146.897	159.946	197.711	154.175	213.549	221.89	259.004	206.225
			93.4979	168.942	159.483	199.639	149.514	239.748	215.181	160.432	195.241	240.217	163.576	179.938
			90.4635	118.578	167.987	170.322	128.303	178.167	225.774	160.901	300.443	269.149	154.307	222.928
			92.516	159.483	140.179	172.084	165.867	154.299	176.02	179.801	247.583	215.949	159.574	186.684
			98.2045	114.234	177.087	151.064	167.473	153.975	136.205	180.111	176.173	219.295	205.405	209.658
			90.9054	201.421	149.946	163.123	132.601	141.981	202.698	164.753	276.928	171.024	160.007	327.377
			97.405	205.913	152.26	171.889	161.346	209.121	156.472	150.237	297.65	167.553	267.953	263.797
			102.473	176.195	162.489	145.336	147.744	98.1796	127.897	153.377	179.329	127.003	179.904	210.052
			87.1171	149.417	108.514	156.895	139.717	170.545	148.017	173.399	167.145	171.435	127.864	177.951
			80.3345	116.495	131.872	186.545	119.622	305.869	151.233	207.4	170.953	254.006	306.954	185.405
			121.406	163.672	127.448	179.156	171.04	165.019	242.814	255.308	229.669	140.364	226.517	320.18
			108.21	114.345	149.4	193.906	173.378	173.939	138.181	249.04	176.088	187.7	153.899	338.342
			107.009	121.094	157.151	204.04	164.586	175.679	145.452	317.506	153.12	174.636	164.895	190.737
			103.944	130.548	183.001	188.992	126.54	232.182	231.223	209.212	178.23	168.975	201.167	201.917
			89.0718	151.005	150.32	183.51	129.516	224.026	135.819	199.247	215.195	132.668	200.288	229.919
			97.1866	108.168	241.234	157.146	109.813	168.898	234.477	217.558	166.88	227.09	217.077	282.335
			102.839	114.106	158.019	170.082	193.034	215.692	142.5	226.993	253.431	194.237	201.316	151.486
			116.574	101.476	119.002	176.419	184.731	183.358	199.471	100.596	217.378	225.51	175.087	295.778
			116.418	231.872	193.063	209.006	174.146	268.336	187.17	112.132	233.606	191.224	240.878	250.034
			118.405	166.057	185.644	207.974	121.542	150.845	190.709	161.772	181.77	229.673	189.554	242.26
			109.935	166.483	164.667	171.068	175.047	272.213	162.59	194.838	209.529	244.559	224.096	362.194
			109.967	185.335	132.457	153.768	210.072	150.219	220.678	193.537	226.277	218.168	202.402	210.444
			84.9322	140.561	156.247	163.081	182.606	240.528	160.761	152.477	178.086	212.333	281.858	199.117
			116.775	142.588	183.07	158.681	159.164	214.874	146.302	177.031	211.639	217.256	322.624	161.876
			92.0742	180.668	181.551	183.69	159.049	169.339	165.898	208.604	257.057	199.728	192.296	145.852
			102.231	125.878	178.167	126.818	210.931	173.914	170.185	161.731	190.235	167.356	250.203	358.687
			125.984	152.458	177.924	178.623	193.74	255.644	174.297	165.28	191.274	203.803	261.578	254.132
			143.489	123.569	149.652	117.828	195.138	219.192	181.187	171.516	214.729	187.832	337.521	277.476
			118.331	162.154	149.777	141.174	186.548	178.536	171.232	127.664	175.371	178.781	189.34	281.69
			132.513	112.551	146.637	190.232	183.644	133.625	205.792	146.381	315.324	302.383	236.157	186.544
			140.289	199.559	193.315	174.057	232.672	149.284	199.751	178.708	206.052	268.645	245.082	211.351
			94.1308	144.578	158.509	194.316	229.407	134.962	170.533	162.24	203.888	350.291	186.257	215.78
			103.858	217.615	146.702	253.936	203.835	212.653	221.924	219.333	214.057	282.276	286.267	117.345
			92.0382	150.234	135.718	174.055	230.306	144.539	169.049	131.645	222.899	225.01	141.929	165.267
			100.011	128.914	145.429	166.457	219.667	107.096	204.973	196.291	193.531	262.582	187.92	289.272
			79.0484	132.687	146.676	166.067	167.435	195.512	172.044	225.237	205.351	178.153	235.659	202.927
			72.4719	152.267	182.367	116.161	178.386	151.291	211.851	221.658	170.777	188.562	265.915	243.08
			116.816	173.802	239.249	141.954	173.69	189.359	176.375	192.355	231.746	219.053	206.884	184.483
			76.8315	162.75	146.845	122.344	233.581	123.283	217.406	308.912	216.354	191.082	373.826	222.945
			82.3903	139.648	123.818	188.603	191.114	181.378	230.533	197.03	248.834	164.31	204.971	295.695
			87.6433	159.374	148.256	193.014	173.512	200.417	218.139	299.688	205.677	176.321	141.562	252.853
			134.411	155.403	125.508	198.079	231.749	138.119	229.709	148.779	223.537	189.718	295.527	226.609
			98.565	156.906	158.399	180.366	177.495	185.228	145.497	313.889	257.803	219.208	286.926	284.497
				210.424	135.101	165.798	148.614	158.68	195.121	190.74	218.95	220.904	178.124	245.151
				152.195	140.09	188.281	128.337	203.117	230.787	312.213		288.132	351.934	285.214
											197.259
				182.307	149.414	151.324	161.021	124.533		322.653		192.698	230.36	200.996
											228.605
				105.649	127.505	169.197	192.312	225.351		220.501		208.6	205.731	278.843
											195.871
				106.456	184.388	175.083	163.11	195.045		191.436		218.011	212.99	279.179
											182.065
				136.088	188.312	172.08	166.993	186.23		154.553		246.273	209.65	285.59
											213.04
				195.988	131.511	136.978	204.238	151.198		158.792		175.189	317	198.63
											185.119
				161.122	182.72	183.459		262.238		226.909		181.66	138.673	213.045
											201.244
				135.407	187.454	117.505		175.224		205.941		264.403	228.918	292.087
											158.54
				154.275	180.273	149.302		215.068		222.132		182.8	167.894	225.607
											162.597
				167.153	105.622	185.774		244.141		150.849		206.8	207.822	171.301
											214.497
				149.942	156.34	127.723		158.347		183.999		244.424	250.299	226.472
											177.199
					163.454	134.945		212.335		185.675		252.685	459.059	324.835
											173.35
					134.738	161.858		184.18		175.515		256.309	255.429	147.717
											200.024
					151.247	150.497		211.264		225.539		227.649	169.852	157.176
											212.878
					127.63			201.756		137.339		217.198	213.491	259.145
											173.022
					188.614			203.478		174.955		247.309		166.214
											164.523
					164.127			210.112		121.753		286.396		195.393
											181.647
					119.311			132.538		189.218		193.319		324.675
											193.182
					164.437			193.374		205.536		183.828		124.014
											221.289
					127.908			164.198		178.05		251.93		231.914
											220.447
								219.573		234.648		196.124		170.694
				144.499	145.673	151.818					205.512
								201.367		168.087		233.919		204.635
				159.438	161.508	165.961					176.129
								252.625		235.014		185.911		230.853
				200.695	123.482	195.295					157.062
								225.593		263.509		281.482		168.158
				159.174	153.09	221.681					174.135
								182.113		286.615		184.376		192.337
				125.514	141.732	157.62					129.279
								211.336		271.623		286.726		140.705
				165.944	135.566	178.174					157.902
								147.824		266.139		179.353		176.192
				147.572	143.04	153.407					178.144
								145.263		250.714		205.992		171.398
				167.277	175.428	154.405					143.206
								200.911		166.091		226.151		173.154
				219.225	114.901	205.477					152.162
								200.16		178.887		242.032		261.885
				161.017	117.317	161.963					180.919
								175.404		138.347		475.53		160.839
				142.858	135.84	202.239					136.028
								164.73		133.372		226.961		238.574
				159.833	321.695	130.232					188.508
								187.414		207.693		268.738		197.044
				163.359	142.237	173.193					151.33
								165.706		215.307		215.711		215.087
				193.411	146.474	169.379					175.855
								187.527		216.719		226.772		222.846
				202.066	163.96	140.634					243.418
								240.504		232.196		245.155		272.561
				175.76	124.411	151.066					250.274
								182.308		245.314		208.397		308.96
				183.4	176.978	109.758					171.235
								196.771		290.173		250.72		242.663
				208.96	149.647	212.617					196.4
								267.036		260.923		173.461		173.23
				209.766	107.422	156.732					225.878
								144.599		214.424		174.773		162.09
				136.755	109.316	181.39					170.281
								158.541		309.037		259.244		228.868
				150.961	127.712	184.809					205.825
								200.609		195.863		228.895		202.992
				150.128	123.52	149.51					196.222
								195.129		232.754		279.199		129.241
				166.252	112.75	190.334					193.581
								152.392		221.132		127.613		139.407
				168.328	154.392	164.999					202.67
								181.501		213.167		164.676		184.751
				127.02	110.059	126.798					228.677
								185.775		256.22		232.843		203.508
				140.157	124.061	140.902					175.225
								207.002		198.98		215.285		163.16
				109.947	106.78	148.254					190.78
								234.857		255.743		190.458		274.836
				118.161	127.67	155.95					278.054
								230.818		214.015		179.132		312.763
				134.114	101.39	120.571					197.302
								213.967		205.778		261.292		326.459
				157.983	103.433	168.372					195.957
								186.49		146.159		221.25		214.182
				124.092	129.921	174.498					226.502
								240.536		212.623		190.674		215.451
				133.233	152.992	177.75					176.485
								265.693		225.682		193.632		188.124
				104.007	149.991	205.957					212.648
								182.09				211.318		215.309
				117.221	170.353	187.147					197.147
								217.409				203.07		202.044
				139.66	140.484	200.216					130.456
								197.74				182.018		159.475
				103.723	164.545	152.173					212.192
								226.119				173.67		174.164
				140.699	175.34	255.609					296.491
								159.529				236.623		206.386
				135.381	166.56	161.085					144.946
								146.601				199.2		269.133
				160.057	197.016	149.59					166.051
								169.444				182.278		184.116
				158.227	151.738	199.273					196.248
								265.91				260.377		154.084
				150.795	179.492	195.652					238.745
												172.211		212.002
				169.426	173.341	181.34					196.909
												198.262		232.963
				134.909	199.868	144.252					183.211
												292.802		190.311
				133.646	137.698	171.706					192.289
												236.315		234.364
				158.893	217.218	121.788					244.998
												199.177		201.332
				136.463	185.049	130.611					248.582
												217.422		207.977
				144.442	136.906	156.135					192.315
												189.379		150.138
				140.371	156.781	155.825					175.073
												240.403		243.797
				122.42	187.333	160.615					165.174
														142.035
				150.396	145.809	146.133					171.733
														128.374
				160.434	196.873	160.432					261.569
														209.63
				121.797	214.699	152.081					195.8
														187.788
				181.486	130.477	174.119					158.069
														223.846
				173.718	170.909	149.452					164.586
														295.068
				180.924	179.203	206.551					218.762
														315.746
				152.367	175.699	125.378					162.123
														261.97
				111.246	169.232	202.922					180.589
														314.719
				167.504	170.114	170.101					145.909
														332.781
				145.688	216.37	189.676					152.517
														288.543
				170.716		142.895					210.451
														241.819
				138.286							176.8
														314.041
				156.326							222.813
														265.342
				121.146							173.805
														220.242
				130.966							155.351
														210.334
			123.692								198.362
														200.77
			83.8887								207.18
														328.268
			137.702								165.544
														329.939
			105.269								199.904
														232.66
			101.785								157.547
														279.511
			85.2236								150.996
														176.845
			152.675								175.983
														213.923
			119.691								171.056
														180.332
			134.46								189.275
														264.386
			112.538								260.039
														259.028
			95.5139								145.001
														194.063
			116.735								271.759
														266.516
			110.657								207.505
														305.952
			107.844								190.269
														291.593
			102.559								197.157
														235.013
			95.9943								159.128
														175.329
			99.4303								221.499
														219.372
			101.934								258.996
														352.764
			77.5111								224.259
														225.041
			78.5767								187.72
														299.148
			105.046								235.522
														181.503
			86.0241								219.13
														256.654
			131.152								288.525
														250.357
			131.086								212.573
														240.43
			82.0383								213.895
														229.804
			116.778								221.7
														218.595
			124.181								240.031
														276.384
			99.1143								251.255
														293.752
			98.1609								192.664
														231.102
			92.6002								251.112
														233.592
			83.5405								408.954
														230.29
			79.221								216.046
														240.7
			102.581
														217.289
			113.799
														253.873
			114.839
														327.08
			80.4734
														261.085
			118.875
														279.371
			109.856
														234.354
														274.153
														221.103
														210.843
														271.065
														211.745
