# Supplementary material for: A stable microtubule bundle formed through an orchestrated multistep process controls quiescence exit
Source: eLife. 2024 Mar 25;12:RP89958. doi: 10.7554/eLife.89958 (PMC10963028; doi:10.7554/eLife.89958)
Supplement: Figure 1—source data 5. [file elife-89958-fig1-data5.xlsx]

## Sheet: Feuil1
	+24h		+24h +24h Wash-out		+24h +48h Wash-out		+24h +144h Wash-out			+24h +24h Wash-out		+24h +65h Wash-out		+24h +168h Wash-out			+10h	+10h +26h Wash-out		+10h +50h Wash-out		+10h +74h Wash-out
	DMSO	NOC	DMSO	NOC	DMSO	NOC	DMSO	NOC		DMSO	NOC	DMSO	NOC	DMSO	NOC		NOC	NOC	DMSO	NOC	DMSO	NOC	DMSO
n=	226	222	221	213	213	222	214	215		123	125	122	113	116	123		104	252	285	214	208	150	282
Mean	1.41238	0.776108	1.36528	0.817404	1.36796	0.858104	1.41218	0.844205		1.47764	1.02933	1.55212	1.02326	1.52021	0.907992		0.508808	0.693071	1.23148	0.670486	1.37134	0.577433	1.00413
SD	0.573596	0.353014	0.579568	0.353171	0.596749	0.453839	0.670388	0.419062		0.59592	0.513728	0.591016	0.573668	0.574822	0.443934		0.105412	0.296541	0.492546	0.273986	0.532831	0.277285	0.494437
T-test	8.56461e-37		5.63618e-28		3.86351e-21		1.02995e-22			1.12544e-09		3.45872e-11		3.63968e-17				2.53286e-44		7.59909e-46		8.12702e-27
	0.388368	0.223369	0.962096	0.296072	0.471926	0.739474				0.326979	0.931813	0.673183	0.087727					0.393655	0.00313807	0.00169007	5.79477e-14
	1.6	0.882	1.849	1.524	1.781	0.797	1.659	1.004		1.878	1.294	1.226	0.503	1.947	1.846		0.32	0.791	1.707	0.434	2.365	0.551	0.88
	1.007	1.371	1.226	0.525	2.214	0.759	1.347	0.43		1.3	0.877	1.542	0.355	1.978	1.068		0.56	0.518	1.677	0.646	2.628	0.258	1.221
	1.334	0.424	3.32	1.288	2.258	2.458	2.315	0.42		0.896	0.868	1.269	0.845	2.129	1.323		0.347	0.975	1.259	0.502	0.557	0.304	0.62
	2.629	0.367	0.88	1.013	1.763	0.807	1.968	0.563		1.813	0.859	2.032	2.407	1.875	0.844		0.432	0.532	2.12	0.837	1.632	0.919	1.551
	1.411	0.355	2.408	1.013	0.808	0.439	1.987	1.702		2.121	0.62	2.465	0.665	1.163	0.822		0.379	0.387	1.544	0.571	1.521	0.476	1.463
	2.289	1.039	0.918	0.904	0.854	0.529	2.043	0.541		1.258	1.131	1.101	1.742	2.106	0.462		0.416	1.136	1.789	0.593	0.246	0.434	0.439
	1.886	0.599	1.392	1.091	0.949	0.838	1.025	0.626		0.692	0.643	1.907	0.577	1.112	0.448		0.591	0.645	1.387	0.777	1.01	0.563	0.258
	1.773	0.639	1.734	1.948	0.905	0.529	0.678	0.29		2.587	1.131	1.371	0.987	2.523	0.465		0.646	0.826	0.626	1.072	1.326	0.692	0.525
	2.043	0.503	0.658	0.68	1.582	1.437	2.326	0.623		2.44	2.34	1.548	1.058	1.28	0.563		0.441	0.449	0.689	1.008	2.694	0.453	1.653
	2.503	0.463	1.683	0.488	1.122	1.491	2.246	0.75		2.041	0.904	1.615	0.665	1.387	0.671		0.498	0.503	0.829	0.684	1.422	0.949	0.634
	1.17	0.903	1.494	0.276	0.769	0.626	1.44	0.252		1.968	1.48	2.062	0.595	2.685	0.817		0.379	1.973	1.088	0.419	1.646	0.634	1.368
	0.791	0.43	1.676	1.437	1	0.491	2.809	1.041		1.628	0.791	1.265	0.394	1.197	0.897		0.513	0.457	0.987	0.537	0.857	0.959	0.368
	2.173	0.939	0.712	0.388	1.411	0.297	1.462	0.677		1.037	1.245	2.098	1.033	1.113	0.408		0.495	1.088	1.214	1.296	1.322	1.154	0.332
	1.49	1.034	1.277	0.42	0.894	1.163	3.172	0.413		2.193	0.896	0.549	0.775	0.387	0.959		0.493	0.387	1.361	1.432	1.19	0.451	1.033
	2.546	0.827	1.173	1.068	1.008	1.151	1.851	0.616		2.002	0.865	0.684	0.684	0.871	2.082		0.603	0.365	0.458	1	1.372	0.449	0.479
	1.075	0.835	1.226	0.671	0.456	1.258	2.74	0.716		1.467	1.356	1.141	0.712	1.128	0.785		0.552	0.848	1.876	0.399	2.521	0.332	1.402
	0.731	0.385	1.393	1.857	1.995	1.938	1.066	0.887		0.356	0.42	1.298	0.716	1.341	0.69		0.36	0.481	0.6	0.133	2.161	1.025	0.276
	1.075	1.367	1.615	0.517	0.78	0.767	0.868	0.686		1.749	0.931	1.05	0.491	1.113	1.4		0.618	1.216	0.648	0.52	2.141	1.05	1.905
	2.433	1.121	1.056	0.571	1.777	0.517	1.341	0.288		1.805	0.69	1.813	0.517	1.936	0.319		0.475	1.367	1.688	0.616	1.935	0.388	1.244
	0.966	0.49	1.532	0.408	0.887	0.854	1.183	0.64		1.533	0.563	1.683	1.909	2.093	0.593		0.416	1.25	1.898	0.721	2.589	0.399	0.39
	1.389	0.962	1.042	0.216	1.088	0.563	2.698	0.434		2.19	0.479	1.168	1.326	1.803	2.054		0.432	0.585	1.306	0.388	2.365	0.623	0.413
	1.67	0.599	0.683	1.04	0.797	0.439	1.269	0.332		1.333	1.463	1.232	1.458	1.419	1.02		0.438	0.639	1.359	0.424	2.138	1.241	1.392
	1.91	0.732	1.746	0.728	0.767	0.525	0.71	0.297		0.847	0.814	1.073	1.781	0.923	0.955		0.475	0.31	0.43	0.665	1.344	0.319	0.886
	0.791	1.289	1.296	0.821	1.979	0.434	2.286	0.581		1.672	0.812	0.887	0.88	2.362	0.871		0.593	1.101	0.97	0.51	0.64	0.549	0.51
	1.004	0.597	1.246	0.78	1.564	0.465	1.847	0.608		0.897	0.304	2.388	0.337	0.684	0.847		0.524	0.389	0.798	0.376	1.94	0.665	1.978
	1.67	0.947	1.161	0.837	0.589	0.826	0.64	0.698		1.174	0.871	1.46	0.851	1.169	1.145		0.534	0.966	1.212	0.626	1.583	0.563	1.294
	3.115	1.121	1.586	0.479	1.717	0.233	2.356	0.365		1.622	1.792	1.129	0.968	2.122	1.088		0.472	0.827	1.111	0.593	1.174	0.361	1.33
	0.769	1.742	1.839	0.886	0.981	0.983	1.621	1.173		1.792	1.267	1.33	1.114	1.136	1.653		0.475	0.705	1.344	0.931	0.456	0.716	1.457
	1.121	1.525	2.255	1.259	1.369	0.844	0.297	0.593		2.091	0.809	0.748	0.555	0.505	0.793		0.416	0.732	1.724	0.548	1.305	0.394	0.935
	1.211	0.288	1.624	0.736	0.337	0.343	2.037	0.645		0.548	1.326	1.792	0.595	2.128	0.939		0.224	0.481	1.459	0.322	2.354	0.404	0.349
	1.116	0.928	1.872	1.563	0.324	1.145	2.246	1.026		0.491	0.424	1.857	2.36	1.098	0.987		0.483	0.668	1.848	0.662	1.174	0.288	0.91
	1.36	1.022	0.476	0.652	1.29	0.736	0.787	0.824		2.161	0.329	1.467	1.104	0.593	0.636		0.609	0.313	0.479	0.541	1.261	0.548	1.285
	1.789	1.047	1.925	0.881	2.011	1.559	0.525	0.648		0.752	1.347	0.548	0.841	0.26	0.735		0.517	1.019	1.674	0.501	0.812	0.376	0.465
	1.493	1.36	1.789	0.361	1.619	0.839	2.463	0.949		1.416	2.052	1.432	1.234	1.755	0.653		0.432	0.518	1.161	0.419	1.145	0.68	0.665
	1.155	0.766	1.994	0.343	1.692	0.479	0.981	0.448		0.824	0.649	1.378	0.458	1.645	0.332		0.455	0.43	1.037	0.318	1.819	1.14	0.737
	1.377	0.43	2.082	0.769	0.779	1.078	2.127	0.671		0.274	1.221	2.144	1.635	1.29	1.426		0.493	1.399	1.165	0.505	2.418	1.024	0.653
	1.646	1.231	2.819	0.41	1.241	0.767	0.408	0.671		1.745	0.645	2.558	2.237	1.961	1.103		0.646	0.473	1.587	0.462	2.105	0.235	0.322
	0.475	0.561	1.432	0.737	1.31	1.361	0.537	0.626		0.493	1.039	2.036	0.532	0.557	1.385		0.567	0.481	1.464	0.871	0.71	0.935	0.297
	0.695	1.553	1.76	1.508	1.209	1.295	0.707	0.692		1.994	1.143	1.572	2.264	1.847	0.492		0.554	0.885	1.385	0.626	0.653	0.304	0.349
	1.401	0.574	1.002	1.018	2.335	0.808	1.709	1.064		2.025	1.582	0.574	0.322	0.502	1.89		0.513	0.396	1.437	0.646	0.581	0.877	1.446
	2.197	0.579	1.129	0.51	2.037	0.516	0.306	0.623		0.392	0.937	2.548	1.356	1.952	0.368		0.593	0.262	0.616	0.408	2.159	0.368	0.329
	1.565	0.83	1.949	1.46	1.845	0.337	1.246	0.399		1.034	0.652	2.042	0.476	1.228	0.837		0.305	0.43	0.532	0.686	1.656	0.439	1.291
	1.256	0.656	1.438	0.88	1.252	1.096	1.065	0.51		1.438	0.981	2.438	0.332	1.324	1.018		0.438	0.803	1.161	0.653	1.431	0.439	0.957
	1.619	1.367	1.517	0.557	0.485	0.51	1.809	0.692		2.02	0.75	0.806	1.486	1.91	0.636		0.475	0.523	0.742	0.981	1.406	1.025	0.42
	1.867	0.585	1.194	0.347	0.521	1.183	1.605	1.963		2.085	0.616	0.589	0.52	2.091	1.053		0.567	0.532	0.785	0.698	1.194	0.931	0.377
	2.082	0.486	2.105	0.356	0.448	0.465	0.78	0.592		1.098	0.413	2.106	1.355	1.89	1.388		0.513	0.608	0.476	0.479	0.912	1.018	0.671
	2.803	0.616	0.541	0.987	0.753	0.549	0.297	0.645		1.008	0.708	1.103	2.131	0.851	0.665		0.495	0.561	1.122	0.51	0.861	0.822	0.394
	0.49	0.835	1.008	0.368	2.619	0.548	0.434	0.824		2.276	0.767	0.912	0.677	0.896	0.861		0.386	1.296	0.581	1.134	1.48	0.292	1.064
	1.808	0.336	0.868	0.761	2.806	1.091	2.424	0.913		1.846	1.938	1.781	0.68	1.999	0.69		0.475	0.926	0.867	0.394	1.622	0.29	0.708
	1.792	0.639	1.14	0.439	1.004	1.335	2.144	0.826		1.098	0.349	0.9	0.904	1.068	0.549		0.483	0.481	0.419	0.898	1.378	0.62	0.51
	0.712	0.695	1.683	1.88	1.396	0.42	1.471	0.708		1.904	0.399	0.949	0.453	2.237	0.634		0.713	1.293	1.939	0.355	0.376	0.376	1.126
	1.026	0.544	2.6	0.777	1.245	0.616	0.479	2.235		0.548	2.02	1.748	0.404	1.587	1.329		0.552	0.68	0.479	0.847	1.14	0.377	1.827
	1.003	0.481	1.448	1.538	2.344	1.276	0.968	1.385		1.112	1.413	1.756	0.552	1.572	0.419		0.524	0.769	1.461	0.635	1.361	0.462	0.983
	1.754	0.611	0.73	0.577	1.172	0.714	1.816	0.484		1.697	0.537	2.456	0.614	2.419	0.356		0.675	0.424	0.847	0.636	0.9	0.595	0.343
	1.598	0.817	0.797	0.623	1.644	0.492	1.628	0.877		0.462	0.725	1.936	1.111	2.057	0.404		0.379	0.877	1.254	1.494	1.419	0.388	0.288
	1.174	0.481	2.302	0.387	1.852	0.774	1.298	0.465		0.479	1.256	2.967	2.057	2.226	0.581		0.441	0.672	2.181	0.488	2.644	0.266	0.97
	0.272	1.046	0.957	0.612	1.273	0.68	2.51	0.614		1.335	1.358	1.316	1.557	1.98	0.613		0.432	0.808	1.098	0.877	2.38	0.276	0.485
	0.86	0.668	2.169	0.521	1.05	0.918	1.717	0.592		1.866	1.612	2.093	1.01	0.868	0.595		0.403	0.735	1.125	0.924	0.492	0.904	1.396
	1.605	0.731	1.264	0.392	1.194	0.581	1.2	0.521		1.316	0.848	1.111	0.755	0.765	1.151		0.438	0.608	1.477	0.408	1.859	0.68	0.434
	1.358	0.645	1.875	0.6	0.769	0.774	1.252	0.42		1.432	1.516	1.323	2.185	1.114	1.129		0.464	0.486	1.971	0.761	1.302	0.695	1.575
	1.491	0.457	0.809	0.896	1.888	1.241	0.51	0.798		0.571	1.396	1.717	0.826	1.125	0.388		0.585	0.566	1.129	0.419	0.408	0.548	2.003
	2.084	0.816	0.636	0.549	1.71	0.645	1.971	0.665		0.755	1.522	1.53	0.525	0.993	0.735		0.585	0.608	2.043	0.829	1.464	0.194	0.643
	0.827	0.182	1.907	0.602	1.226	0.458	1.833	0.626		2.34	0.781	2.048	0.465	0.64	1.239		0.441	0.327	1.297	0.75	1.002	1.102	0.377
	1.577	0.347	1.496	1.588	1.87	0.551	2.958	0.731		2.212	0.822	1.774	1.025	1.71	0.549		0.524	0.516	1.388	0.602	0.936	1.292	0.318
	1.198	0.262	1.618	1.072	1.2	0.399	1.729	1.125		1.226	0.581	1.491	0.368	1.872	1.446		0.475	1.125	0.913	1.288	1.793	1.231	1.392
	0.449	0.871	0.952	0.665	1.66	0.413	1.228	0.434		1.643	2.351	1.575	2.396	1.491	0.292		0.536	1.004	0.555	0.297	1.797	0.698	0.337
	0.904	0.547	1.491	0.534	0.913	0.424	1.776	1.168		1.327	0.563	0.684	1.662	1.442	1.338		0.475	0.043	0.975	0.534	2.481	0.563	0.935
	1.764	1.019	1.693	0.677	1.38	1	1.703	1.034		1.307	0.759	1.05	0.909	2.085	0.809		0.403	0.731	1.999	0.555	0.871	0.404	1.532
	1.238	0.406	0.765	1.367	2.672	1.297	2.587	1.622		1.013	1.002	2.568	0.39	1.991	0.908		0.707	0.646	2.034	0.653	0.678	0.737	0.671
	0.885	0.465	2.208	0.735	1.065	1.676	2.523	0.42		1.072	1.98	1.904	0.968	2.281	0.365		0.571	0.793	1.487	0.595	1.042	0.204	1.025
	1.102	0.304	1.638	0.43	1.081	0.917	1.05	0.962		2.012	1.38	1.226	0.505	2.131	0.343		0.495	0.551	0.769	0.368	0.809	0.368	0.808
	1.218	0.993	2.193	0.595	1.616	0.801	0.684	0.649		1.335	0.297	1.549	0.684	0.929	1.402		0.513	0.518	1.012	0.62	1.302	0.228	0.593
	1.49	0.503	1.103	0.767	0.777	0.935	0.465	0.356		1.368	0.592	1.326	0.871	0.593	1.01		0.464	0.982	0.959	0.924	1.154	0.962	0.26
	1.977	0.803	1.942	0.42	0.665	0.861	2.335	0.408		0.42	1.198	1.543	0.779	0.708	0.848		0.493	0.962	0.574	1.177	0.769	0.748	1.455
	1.125	0.83	0.671	0.721	2.148	0.492	1.165	0.69		2.354	1.125	1.316	1.145	1.58	0.791		0.648	0.396	2.194	0.449	0.696	0.501	0.297
	0.966	0.705	1.992	0.75	1.46	0.626	2.001	0.626		1.748	1.4	1.977	1.323	2.165	2.355		0.653	1.471	1.809	0.614	1.635	0.235	1.413
	2.524	0.731	0.942	0.841	2.252	0.433	1.613	0.787		1.897	1.809	1.174	1.001	1.01	0.448		0.536	1.036	1.449	0.529	1.123	0.322	1.084
	2.65	0.574	0.816	0.64	1.88	0.966	0.806	0.821		2.084	0.297	2.244	2.121	1.391	0.686		0.524	1.034	1.294	0.798	1.214	0.276	1.261
	2.281	0.639	1.11	1.519	0.555	1.226	1.163	1.809		1.621	0.918	2.328	0.753	1.227	0.501		0.707	0.731	0.368	0.671	1.018	0.322	0.548
	1.673	0.712	1.703	0.821	2.161	0.537	1.226	0.484		1.644	1.129	1.645	0.68	1.665	0.329		0.524	0.626	1.688	1.163	0.854	0.844	0.525
	0.775	0.785	0.716	1.673	2.664	1.322	0.88	0.731		1.861	0.525	1.95	1.258	2.073	2.163		0.552	0.396	0.492	0.684	1.431	0.356	1.516
	1.462	0.43	1.292	0.525	1.614	0.419	1.195	0.917		0.929	1.355	2.103	0.571	0.479	0.529		0.441	1.119	1.494	0.953	0.616	0.485	0.413
	1.395	0.503	2.031	1.717	2.606	0.451	0.985	0.62		2.539	1.919	1.14	2.569	1.807	1.98		0.515	0.962	1.252	0.841	1.853	0.413	1.643
	1.369	0.449	1.284	0.646	2.066	0.577	1.494	0.58		2.14	2.127	1.05	0.41	1.3	0.332		0.472	0.861	1.489	0.564	0.936	0.368	1.097
	1.379	0.709	2.042	0.88	1.779	0.329	0.935	0.78		0.809	0.985	0.821	0.829	1.918	1.781		0.495	0.31	0.517	0.337	0.689	0.75	1.14
	0.907	0.848	0.277	1.302	1.327	0.748	0.686	1.125		1.406	0.981	0.797	0.504	2.478	1.328		0.694	0.457	0.337	0.658	0.408	0.484	0.824
	2.322	0.904	0.993	0.658	1.948	0.897	1.049	0.52		2.3	0.318	0.574	0.557	1.343	1.234		0.705	0.539	1.942	0.913	1.197	0.958	0.484
	1.988	0.808	1.058	1.256	2.253	1.033	1.004	1.42		1.846	0.787	0.97	1.52	2.526	1.354		0.493	0.523	0.88	0.368	0.868	0.868	0.959
	1.265	0.639	1.198	0.684	1.648	0.678	0.952	0.71		1.959	0.347	1.51	0.975	1.44	0.448		0.713	0.695	1.736	1.069	1.46	0.29	0.484
	1.078	0.593	2.596	1.129	0.51	0.532	2.376	0.952		2.417	0.817	1.477	0.623	0.505	0.753		0.577	0.785	0.571	0.877	0.892	0.318	0.873
	1.422	0.419	2.126	1.082	1.852	2.601	2.384	1.658		1.194	0.62	1.683	1.875	0.564	0.785		0.495	0.465	1.28	0.844	1.335	0.297	1.258
	2.028	0.765	1.098	0.936	1.575	1.496	0.839	1.524		2.308	0.78	0.822	0.517	1.039	1.458		0.66	0.532	2.582	0.712	1.013	1.037	0.439
	1.811	0.712	1.753	0.689	1.477	0.798	0.736	0.571		1.619	1.214	1.183	0.745	1.658	0.626		0.214	0.602	0.989	0.68	1.909	0.505	1.084
	0.645	0.488	0.613	0.704	2.064	0.877	0.678	0.368		1.69	0.822	1.665	1.272	1.419	0.388		0.808	1.078	1.261	0.555	0.721	0.721	0.62
	1.733	0.71	2.686	0.908	1.258	0.549	2.424	0.612		1.779	0.678	1.674	1.033	2.163	1.501		0.571	0.895	1.487	0.602	0.288	0.671	0.712
	1.231	0.671	0.847	1.388	1.76	0.968	1.607	1.836		1.487	0.78	2.703	0.777	1.717	0.939		0.343	1.183	0.626	0.292	1.29	0.404	0.324
	1.119	0.51	1.586	0.571	0.798	0.832	1.096	0.958		1.261	0.448	1.226	0.987	1.643	0.404		0.585	1.224	1.072	0.355	0.859	0.235	1.491
	1.619	1.234	1.643	0.908	2.532	0.434	2.348	1.008		0.871	0.877	1.053	0.614	1.516	1.14		0.591	0.7	1.375	0.42	1.784	1.204	0.868
	1.424	1.024	0.73	0.728	1.2	0.589	1.97	2.269		1.588	0.826	1.945	1.232	0.968	1.045		0.483	0.344	0.678	0.476	1.056	0.399	0.939
	1.878	0.737	1.284	0.737	1.181	0.584	1.645	1.785		2.14	1.494	2.543	0.577	2.129	0.595		0.593	0.355	1.906	0.182	1.306	0.277	0.745
	0.646	0.753	1.141	0.707	1.19	0.777	2.135	1.356		1.539	0.847	0.574	1.949	1.029	0.808		0.648	0.43	1.228	0.529	1.543	0.361	0.923
	1.478	1.05	0.852	0.742	1.692	0.322	1.148	0.857		0.917	2.163	2.355	1.259	0.985	0.584		0.495	0.424	1.419	0.645	1.464	0.71	0.505
	0.574	0.456	1.879	0.735	1.723	1.244	0.981	0.904		1.487	1.318	1.397	0.571	1.453	0.392		0.472	0.791	1.161	0.636	1.624	0.504	0.337
	0.486	0.606	0.424	0.462	1.955	0.665	2.024	1.204		2.55	0.737	0.798	2.202	1.489	0.787		0.305	0.439	1.136	0.684	0.887	0.42	0.404
	0.49	0.844	2.034	0.712	1.488	0.602	1.485	0.648		1.101	0.492	1.417	1.091	1.197	0.563			0.817	0.742	0.555	1.601	0.337	0.981
	1.393	1.066	1.119	1.165	2.461	0.896	0.987	1.208		2.328	0.918	2.357	0.801	1.852	1.118			0.37	1.53	0.944	1.665	1.084	0.808
	0.864	0.548	0.868	0.877	1.916	0.39	2.344	0.68		1.002	0.484	1.039	1.372	1.93	1.296			0.912	2.393	0.841	2.203	0.521	1.296
	2.972	1.133	1.665	0.616	1.145	0.449	1.46	0.838		1.553	2.541	2.976	0.981	1.326	0.479			1.129	1.058	0.41	1.581	0.485	1.487
	0.52	1.039	1.066	0.517	0.574	1.925	0.52	1.05		0.742	0.614	0.898	1.466	2.408	0.616			1.4	0.525	0.488	1.487	0.555	1.396
	1.422	0.419	1.466	0.453	2.18	0.898	1.217	0.904		0.716	0.851	1.843	0.689	2.252	1.508			0.808	2.122	0.292	1.205	0.439	1.058
	1.485	0.462	1.197	1.05	0.797	0.793	2.193	0.735		0.735	1.938	2.324	0.439	1.581	1.042			0.712	1.442	0.775	1.195	0.493	1.825
	1.145	0.376	1.152	0.525	0.829	0.712	2.728	1.635		1.091	2.316	2.212	0.696	2.584	1.056			0.406	1.612	0.689	0.809	0.322	2.147
	1.541	1.128	2.04	0.827	2.856	0.593	0.695	1.92		0.376	0.728	0.456	2.174	2.072	1.267			0.7	1.228	1.174	1.029	0.547	1.94
	1.291	0.767	1.575	0.94	1.942	0.871	2.417	0.584		0.935	1.968	2.42		1.454	1.064			0.432	0.904	0.196	1.101	0.525	1.553
	1.856	0.677	1.847	0.563	0.484	1.56	2.916	0.555		2.648	0.68	0.537		2.048	1.228			1.217	1.129	0.871	2.006	0.593	1.033
	1.731	0.626	1.438	0.484	1.35	0.918	0.742	0.581		1.52	1.267	2.328		1.813	0.645			0.731	0.952	0.525	1.485	0.94	1.291
	2.19	2.443	0.557	0.871	0.808	0.857	2.472	0.826		1.789	1.469	1.76			0.75			0.864	1.803	0.838	1.583	0.297	0.678
	1.04	0.868	0.761	0.581	0.716	2.122	1.499	0.62		0.88	1.216	2.445			1.174			0.579	1.467	1.151	1.717	0.564	0.822
	0.669	0.504	0.456	0.721	0.616	0.678	1.254	0.809		0.886	0.479	1.4			0.877			0.775	0.759	0.707	1.501	0.904	1.673
	0.577	0.42	1.332	0.735	0.689	0.297	0.645	0.942		1.816	0.684	2.002			0.859			0.943	1.516	1.28	1.487	0.288	1.621
	0.793	0.742	1.279	0.462	1.212	0.504	1.229	0.448		2.464	0.643	1.129			0.887			0.818	0.541	0.434	2.032	0.918	1.809
	2.753	0.434	1.095	1.852	0.937	0.462	2.318	0.897		1.732	0.456	1.762			0.937			0.475	1.677	1.053	0.376	0.791	1.323
	1.442	0.716	1.729	0.847	2.1	1.236	0.903	1.095		1.3	0.716				0.439			0.981	1.857	1.008	1.587	0.505	0.555
	1.673	0.756	1.236	0.917	0.886	0.394	1.795	0.824			1.14							0.473	1.471	0.626	0.434	0.504	1.791
	2.176	1.169	1.33	1.004	1.163	0.557	0.827	0.886			1.332							0.658	0.955	0.634	1.119	1.39	1.516
	2.206	0.343	2.069	0.78	0.684	0.581	0.871	0.306										0.827	1.026	1.084	0.877	0.324	0.563
	1.947	0.665	1.183	1.02	1.405	1.278	0.968	0.419										1.089	0.908	0.976	1.542	0.347	0.707
	2.712	0.51	2.185	1.232	1.61	0.557	1.112	0.318										0.731	1.226	0.871	0.908	0.297	1.111
	1.637	0.368	1.835	0.854	1.529	0.745	1.148	0.797										0.608	1.002	0.42	1.524	0.525	0.589
	0.803	0.388	0.645	1.072	2.414	1.917	1.003	0.488										0.31	1.693	0.448	1.488	0.781	1.324
	1.325	0.735	1.209	0.521	1.204	2.424	0.837	1.076										0.791	0.806	0.456	1.437	0.707	2.174
	2.385	0.756	1.558	0.686	0.62	0.557	0.606	0.484										0.503	1.428	0.838	1.658	0.492	0.695
	1.822	0.458	1.52	0.479	0.696	0.505	2.246	0.479										1.102	0.935	1.112	0.787	0.616	1.156
	2.682	0.767	1.323	1.418	1.033	0.343	2.116	0.684										0.946	0.94	0.318	1.999	0.439	0.42
	0.947	0.908	0.913	1.056	1.756	0.64	0.322	0.62										0.761	1.3	1.551	1.942	0.361	1.623
	0.946	1.316	0.306	0.695	1.521	0.529	2.435	0.361										0.955	0.868	0.94	1.174	0.361	1.893
	1.851	0.616	0.419	1.67	1.688	0.616	1.204	0.868										0.955	0.274	0.349	1.284	0.329	1.342
	1.461	0.985	0.646	0.752	1.102	1.004	1.136	0.616										0.882	1.228	0.548	2.111	0.589	1.306
	1.704	0.608	2.715	0.458	0.748	1.234	1.347	0.368										1.338	1.672	0.574	1.995	0.595	1.336
	2.463	0.216	1.755	1.256	1.862	1.66	1.316	0.593										0.975	1.405	0.91	1.284	0.712	0.908
	1.478	0.439	1.378	0.913	0.453	0.394	1.123	1.008										1.033	0.439	1.259	1.296	0.408	1.428
	1.283	0.413	0.797	0.871	1.069	0.616	1.254	0.665										0.751	1.588	0.521	1.489	0.304	0.62
	0.955	2.168	2.392	0.775	1.189	0.708	1.551	0.355										0.385	0.75	0.913	0.649	1.226	0.78
	1.507	0.476	1.766	0.686	1.259	0.626	2.03	1.084										0.344	1.566	1.082	2.346	0.847	0.297
	1.145	0.548	1.506	0.479	2.075	1.548	0.923	0.716										0.473	2.312	0.349	1.288	0.504	0.581
	1.296	1.165	2	0.646	1.532	1.602	0.246	0.664										0.655	1.104	0.798	1.942	0.581	1.461
	1.463	1.229	1.396	0.877	0.871	2.201	1.265	0.942										0.532	0.484	0.26	0.71	0.277	0.479
	1.325	1.229	0.923	0.868	1.187	1.659	0.645	0.563										0.547	0.942	1.132	1.854	0.207	0.439
	1.765	0.847	0.88	1.039	1.548	1.02	0.894	1.742										1.31	1.809	0.343	0.737	0.563	1.409
	1.306	0.71	1.548	0.721	1.056	0.525	1.791	1.683										1.291	0.684	1.209	2.109	0.462	0.837
	2.115	1.072	2.126	1.348	0.987	2.05	1.806	1.389										0.539	1.496	0.745	1.2		1.893
	1.468	0.942	0.614	1.489	1.284	1.743	2.309	0.665										0.406	0.388	0.547	1.733		0.937
	0.8	1.091	0.439	0.689	1.764	0.645	0.448	0.877										0.923	0.861	0.735	2.582		1.39
	0.791	2.037	1.343	0.616	2.113	0.368	2.133	1.119										0.367	1.542	0.42	1.221		1.379
	0.732	0.793	2.442	0.491	1.936	0.704	2.181	0.479										0.486	1.082	0.742	1.517		1.613
	2.094	0.485	1.224	0.877	1.095	0.821	1.529	0.501										0.845	0.571	0.332	0.704		1.748
	1.118	0.707	1.832	0.517	1.056	0.905	1.596	0.571										0.981	1.932	0.88	1.355		1.703
	1.904	0.277	0.838	0.725	1.485	0.492	0.892	1.095										1.254	1.426	0.368	1.355		0.394
	0.962	0.434	2.037	1.056	1.95	0.71	1.259	0.996										0.43	1.144	0.581	1.459		1.129
	0.822	0.769	1.593	0.612	1.572	0.51	1.978	1.804										1.026	0.814	0.465	1.974		1.112
	1.174	0.292	2.093	0.671	2.06	0.26	0.662	2.545										0.385	0.959	0.581	0.419		1.503
	1.515	0.88	1.133	0.708	0.62	0.753	1.226	0.555										0.635	1.169	0.678	1.186		0.97
	1.136	0.735	1.378	0.479	0.51	1.054	0.235	1.091										0.911	1.194	0.767	1.298		0.88
	0.791	0.563	1.437	0.648	1.755	1.194	1.204	1.588										0.658	1.118	0.549	1.588		1.302
	1.096	1.082	0.608	0.525	1.583	1.449	2.646	1.662										0.532	1.829	1.197	0.51		1.076
	2.04	1.56	0.904	0.564	1.508	0.755	1.082	0.434										0.347	1.82	0.798	0.233		0.517
	1.765	0.635	0.465	0.912	0.532	0.488	1.731	0.68										0.439	0.645	0.47	1.163		0.623
	2.15	1.186	0.521	0.955	1.221	0.525	0.957	0.525										0.651	1.853	0.646	0.877		1.163
	0.74	1.136	0.451	1.618	1.355	0.564	1.061	0.658										0.304	1.133	0.832	1.581		1.361
	0.712	0.808	0.456	0.581	1.805	0.892	1.937	0.479										0.602	1.489	0.476	1.081		0.904
	1.085	0.665	0.721	0.716	1.269	0.563	1.002	1.208										0.367	0.652	1.039	0.865		0.979
	1.05	1.01	2.132	0.721	1.632	0.91	0.502	1.816										0.817	1.717	0.826	0.865		1.141
	1.422	1.528	1.369	0.935	0.548	0.626	2.144	0.548										0.845	1.229	0.712	1.548		0.306
	1.963	0.909	1.161	0.274	1.571	0.913	1.717	0.368										1.004	0.449	0.752	1.732		1.638
	2.097	1.145	1.797	1.529	1.328	0.769	0.886	1.347										0.577	1.746	0.748	1.588		1.033
	1.581	0.42	0.829	0.276	1.935	0.276	1.322	0.968										0.997	0.753	1.058	1.777		0.297
	0.523	0.737	1.163	1.245	0.235	0.94	0.557	0.996										0.835	0.608	1.024	1.852		1.491
	0.886	0.635	1.829	0.62	0.653	0.505	1.602	0.39										0.585	1.184	0.476	1.065		0.479
	0.406	1.768	0.972	0.678	0.368	1.306	0.807	0.534										0.215	0.608	0.868	1.438		1.002
	1.325	0.623	0.839	0.707	0.462	1.013	1.564	1.643										0.449	1.335	0.424	1.925		0.861
	1.308	0.581	1.355	0.534	2.207	1.491	1.095	1.082										0.313	1.91	1.101	0.982		1.558
	1.212	0.349	1.161	1.604	2.588	1.583	0.548	1.714										0.426	1.87	0.161	1.288		1.145
	1.096	0.376	1.072	0.908	1.593	0.981	0.721	0.692										0.192	1.624	0.47	0.88		0.692
	1.925	0.399	1.327	0.593	1.236	0.832	1.081	0.606										0.547	1.31	0.844	1.732		1.522
	1.27	1.136	0.881	1.029	0.419	0.736	1.99	1.805										0.861	1.271	0.456	1.601		1.572
	1.999	1.234	1.829	0.492	0.424	0.876	2.149	1.11										1.327	0.43	0.465	1.504		1.477
	1.116	0.581	0.704	0.571	2.601	1.174	1.755	0.939										0.966	1.557	0.942	1.168		0.541
	1.276	0.394	0.488	1.399	1.574	0.532	2.033	0.684										1.116	1.833	0.439	2.122		0.318
	0.481	0.71	1.326	0.936	0.42	0.721	0.712	0.731										0.835	0.851	0.548	1.392		1.907
	1.831	1.418	1.561	0.824	0.491	0.894	1.229	0.809										0.611	2.098	0.577	1.076		0.775
	2.096	0.97	1.474	0.777	1.419	0.593	2.03	0.892										0.486	1.313	0.51	0.905		0.664
	0.501	1.111	2.452	0.779	1.024	1.267	1.432	0.752										0.387	0.912	0.368	0.779		1.44
	2.251	1.018	1.768	0.908	0.959	0.761	0.376	0.839										0.365	0.913	0.821	1.746		1.065
	1.174	1.152	1.939	0.801	0.188	0.844	0.433	0.645										0.981	2.358	0.865	2.031		0.623
	1.768	1.51	0.534	0.549	1.344	1.717	2.077	0.981										0.775	0.252	0.318	1.742		1.532
	1.527	0.707	0.394	0.981	1.712	0.645	1.977	0.725										0.318	1.528	0.332	1.956		0.424
	1.646	1.054	1.879	0.491	2.372	1.755	0.534	0.69										0.424	1.529	0.894	1.494		0.962
	1.442	0.735	0.593	0.673	2.058	1.113	0.433	1										0.368	0.689	0.42	1.548		1.264
	0.871	0.781	0.306	0.595	2.001	0.501	2.197	0.564										0.449	1.258	0.692	1.278		0.643
	0.817	0.714	1.97	0.847	1.622	1.284	2.213	0.761										0.29	0.848	0.549	0.949		1.648
	0.835	0.787	0.456	0.753	1.675	0.665	1.71	1.448										0.493	1.56	0.324	1.355		1.653
	0.826	0.968	1.683	0.485	1.761	0.892	1.002	0.581										0.306	0.306	1.045	1.169		1.841
	0.547	0.505	2.348	0.678	2.506	0.39	1.551	0.972										0.322	1.627	0.684	1.48		1.364
	1.277	1.3	1.789	0.465	1.128	0.69	1.612	0.742										0.759	1.432	0.549	1.832		2.172
	2.028	0.505	2.052	0.626	0.68	0.857	1.326	0.581										0.658	0.501	0.29	1.296		0.996
	1.586	0.665	1.428	0.949	1.405	0.516	0.133	0.462										0.689	1.228	0.517	1.755		0.549
	1.041	0.686	1.653	0.491	1.506	2.121	1.091	1.072										0.456	1.952	0.73	1.99		0.343
	0.886	0.592	1.566	1.316	0.649	0.614	0.913	1.313										0.465	1.288	0.485	1.306		0.826
	2.302	0.361	0.801	0.868	1.313	0.698	1.061	0.683										0.476	1.236	1.226			1.893
	1.216	0.549	1.528	0.645	1.306	1.256	1.962	0.646										0.392	1.521	0.434			1.612
	1.797	0.584	1.28	0.581	1.114	0.616	0.707	1.285										0.439	0.595	0.329			0.368
	1.075	0.838	1	0.64	1.078	0.246	1.385	0.865										1.072	1.361	0.563			1.298
	1.143	0.64	0.595	0.355	0.78	0.698	0.871	0.462										0.867	1.14	0.439			1.047
	1.207	0.636	0.707			0.516	0.735	0.881										0.571	2.036	0.501			1.002
	1.174	0.537	1.395			0.698		1.097										0.761	1.677				0.922
	0.886	0.748	0.616			0.721												0.361	0.484				1.217
	1.646	0.903	0.449			0.449												0.394	1.99				0.6
	2.349	0.646	2.428			0.233												0.424	1.593				0.75
	0.8	0.748	2.036			1.807												0.886	1.356				0.968
	0.585	0.368	1.205			0.905												0.648	1.405				1.177
	0.732	1.284	1.444			0.42												0.563	0.164				1.399
	1.007	0.728				0.922												0.419	1.05				1.065
	1.86																	0.937	0.88				1.152
	2.25																	0.765	1.909				1.198
	0.835																	0.434	0.817				0.318
	0.62																	0.332	1.291				0.606
																		0.563	1.2				1.002
																		0.318	1.651				1.026
																		0.814	1.697				0.228
																		0.861	0.516				0.935
																		1.246	1.169				1.549
																		0.476	1.335				1.3
																		0.665	1.097				1.129
																		0.787	2.007				1.14
																		0.448	0.88				1.169
																		0.368	1.396				0.623
																		0.645	0.78				0.525
																		0.952	1.624				0.324
																		0.462	1.784				1.037
																		0.677	1.341				0.399
																		0.937	1.961				0.962
																		0.993	0.877				0.439
																		0.525	1.754				0.664
																		0.456	0.93				1.072
																		0.767	1.588				0.541
																		0.394	1.766				1.995
																		1.264	1.136				1.688
																		1.024	1.449				1.721
																		0.735	1.714				2.031
																		0.479	0.797				0.547
																		0.433	1.356				0.962
																		0.673	1.323				0.886
																			1.039				0.653
																			1.673				1.033
																			1.256				1.336
																			2.034				0.304
																			1.764				0.844
																			1.397				1.259
																			0.41				1.144
																			0.434				0.549
																			2.108				1.826
																			1.832				1.11
																			1.361				1.88
																			0.577				1.458
																			0.861				0.329
																			1.506				1.839
																			0.392				0.439
																			1.742				0.548
																			1.156				0.451
																			1.528				1.072
																			1.601				1.638
																			0.164				0.824
																			0.356				2.328
																			1.064				2.108
																			1.064				1.316
																			1.724				0.847
																			1.601				0.462
																			1.291				0.517
																			0.936				0.742
																			0.769				0.581
																			1.276				0.909
																			1.588				0.491
																			0.614
																			1.638
																			1.144
