# Supplementary material for: A stable microtubule bundle formed through an orchestrated multistep process controls quiescence exit
Source: eLife. 2024 Mar 25;12:RP89958. doi: 10.7554/eLife.89958 (PMC10963028; doi:10.7554/eLife.89958)
Supplement: Figure 2—source data 1. [file elife-89958-fig2-data1.xlsx]

## Sheet: Feuil1
	WT	WT	WT	WT	WT	WT	Tub3delta	Tub3delta	Tub3delta	Tub3delta	Tub3delta	Tub3delta	Tub1only	Tub1only		WT	WT	WT	WT	WT	WT	Tub3delta	Tub3delta	Tub3delta	Tub3delta	Tub3delta	Tub3delta	Tub1only	Tub1only		WT	WT	Tub1only	Tub1only		WT	WT	Tub3delta	Tub3delta	Tub3delta	Tub3delta	Tub1only	Tub1only		WT	WT	WT	WT	Tub3delta
	Isy693 2d -Noc	Isy693 2d +Noc	Isy694 2d -Noc	Isy694 2d +Noc	Y12051 2d -Noc	Y12051 2d +Noc	12137 2d -Noc	12137 2d +Noc	12138 2d -Noc	12138 2d +Noc	12052 2d -Noc	12052 2d +Noc	Isy702 2d -Noc	702 2d +Noc		693 5d -Noc	693 5d +Noc	694 5d -Noc	694 5d +Noc	12051 5d -Noc	12051 5d +Noc	12137 5d -Noc	12137 5d +Noc	12138 5d -Noc	12138 5d +Noc	12052 5d -Noc	12052 5d +Noc	702 5d +Noc	702 5d -Noc		694 5d -Noc	694 5d +Noc	702 5d -Noc	702 5d +Noc		694 2d -Noc	694 2d +Noc	12138 2d -Noc	12138 2d +Noc	12052 2d -Noc	12052 2d +Noc	702 2d -Noc	702 2d +Noc		694 5d -Noc	694 5d +Noc	12051 5d -Noc	12051 5d +Noc	12138 5d -Noc
n=	238	217	202	237	207	118	187	190	219	203	201	210	200	207		204	210	201	300	155	175	198	202	189	213	212	202	101	301		218	262	257	283		204	166	294	288	153	155	196	335		215	213	188	188	222
Mean	1.38881	1.26042	1.34299	1.23108	1.36302	0.878585	0.995888	0.432858	1.19686	0.394793	1.14775	0.470229	1.24511	0.892527		1.45754	1.36581	1.37521	1.27148	1.21966	1.16191	0.615884	0.436861	0.855413	0.432507	0.592835	0.51954	0.962515	1.07426		1.44616	1.3739	1.29765	1.21822		1.46785	1.29504	0.907075	0.448267	0.891699	0.520026	1.30083	0.870421		1.37465	1.31675	1.20591	1.26326	0.516815
SD	0.568843	0.514577	0.523769	0.527054	0.533194	0.349158	0.483832	0.222128	0.606783	0.158788	0.573977	0.191251	0.52425	0.35049		0.686259	0.601219	0.557024	0.51598	0.536242	0.446208	0.360045	0.184562	0.477593	0.200449	0.311675	0.259397	0.318204	0.449218		0.605246	0.642247	0.474576	0.473739		0.556755	0.482536	0.496146	0.18035	0.462831	0.167303	0.550923	0.371391		0.670901	0.673983	0.523846	0.464238	0.204326
	2.684	1.704	1.343	1.518	1.918	0.665	1.234	1.574	0.616	0.595	1.501	0.877	2.038	0.73		2.755	1.451	1.511	2.684	2.225	1.05	2.394	0.698	2.403	0.404	0.686	0.347	1.529	1.33		1.628	2.478	1.323	1.553		1.477	0.957	0.288	0.246	1.596	0.753	0.643	0.347		1.755	2.395	0.62	0.728	0.266
	2.14	0.775	0.551	0.966	1.816	1.194	1.86	0.377	1.4	0.388	2.355	0.413	0.952	1.313		1.548	1.156	2.235	1.615	2.561	2.33	0.465	0.322	1.5	0.47	0.233	0.297	0.94	1.327		1.942	1.14	1.422	1.198		2.03	0.959	0.939	0.292	0.529	0.64	1.041	1.3		2.026	2.816	0.982	1.799	0.643
	1.368	0.602	1.968	1.184	1.012	1.221	1.581	0.324	1.957	0.394	1.304	0.39	0.557	1.446		1.601	0.756	1.746	0.735	0.955	1.065	0.521	0.62	1.231	0.419	0.277	0.377	1.155	0.949		2.488	1.395	1.564	0.673		2.597	0.465	1	0.032	1.072	0.636	1.489	1.194		1.879	0.424	1.615	1.774	0.233
	2.423	1.42	1.05	0.812	2.792	0.571	0.653	0.29	0.653	0.343	1.292	0.581	1.391	0.775		0.852	1.246	1.02	0.648	0.892	1.061	0.58	0.51	1.776	0.207	0.42	0.51	1.211	1.328		0.368	1.753	2.062	1.582		1.653	1.791	1.187	0.365	1.258	0.716	1.047	1.028		0.976	1.012	1.156	1.843	0.322
	1.707	2.356	1.163	1.261	1.712	1.618	2.151	0.388	0.648	0.204	2.582	0.365	0.913	0.725		2.149	1.261	0.62	0.725	1.33	0.903	0.26	0.73	2.163	0.413	0.332	0.39	1.305	1.457		2.108	1.432	1.539	1.521		1.717	1.809	1.776	0.196	1.326	0.574	1.216	0.347		0.419	1.614	1.236	0.404	0.968
	2.114	0.551	2.136	1.484	1.134	0.593	1.05	0.306	2.499	0.246	1.717	0.949	1.212	1.002		2.612	2.932	0.69	1.967	1.416	1.082	0.246	0.343	0.646	0.26	1.14	0.246	0.555	0.505		1.588	1.793	1.428	1.621		0.51	1.415	0.458	0.318	0.684	0.491	1.484	0.51		1.04	0.917	2.592	1.551	0.953
	0.581	0.785	0.484	1.449	1.833	1.154	1.974	0.838	1.737	0.288	1.638	0.332	0.949	1.013		0.904	2.113	1.276	1.284	1.762	1.298	1.923	0.276	1.143	0.365	0.41	0.525	0.993	1.254		2.261	2.442	1.432	1.516		1.313	0.571	1.133	0.194	0.525	0.525	2.04	0.563		1.672	3.016	1.999	1.776	0.484
	1.244	1.39	1.872	1.148	1.351	0.767	0.194	0.26	0.51	0.837	1.428	0.319	2.138	1.136		1.156	1.259	0.78	1.261	1.391	1.742	0.361	0.26	0.851	1.217	0.376	0.266	0.756	2.345		1.101	1.234	0.756	1.632		1.104	2.744	0.484	0.987	0.602	0.504	1.841	0.356		1.46	2.682	1.642	1.776	0.424
	2.006	1.144	1.774	0.94	1.05	1.305	0.484	0.434	2.03	0.129	1.894	0.581	1.441	1.241		0.859	0.75	0.968	0.826	1.674	2.198	0.433	0.332	0.347	0.484	0.47	0.42	0.665	1.284		1.369	0.504	1.33	1.795		2.078	1.132	1.847	0.922	1.575	0.529	1.306	0.517		3.937	4.321	1.29	1.512	0.266
	1.01	1.004	0.26	1.512	1.313	1.013	1.582	0.356	0.816	0.458	1.38	0.304	1.316	1.4		2.744	1.774	2.229	0.904	1.46	1.14	0.233	0.361	1.457	0.292	0.322	0.318	0.634	1.053		2.195	1.93	1.419	1.809		1.836	0.89	1.653	0.678	0.476	0.476	1.406	0.753		2.032	2.005	1.978	2.466	0.581
	0.913	1.431	1.648	1.683	1.431	0.775	1.571	0.937	0.649	0.394	1.219	0.419	1.393	0.144		0.479	1.556	1.239	1.729	1.487	1.165	0.692	0.292	1.35	1.039	0.377	0.29	0.476	1.228		0.725	2.084	1.347	0.953		2.301	1.573	0.952	0.266	1.189	0.26	0.318	0.52		0.581	0.829	1.669	1.276	0.571
	1.643	0.753	1.072	1.399	1.33	1.125	1.464	0.324	1.522	0.288	0.983	0.551	0.923	1.002		1.99	1	1.328	0.742	1.774	1.212	0.246	0.26	0.532	0.399	0.39	0.458	0.549	0.817		2.217	0.949	0.777	1.97		0.571	1.422	0.448	0.361	0.924	0.534	1.053	0.665		1.528	0.491	1.506	1.44	0.704
	0.505	2.365	1.588	2.096	2.007	0.824	0.485	0.419	0.306	0.453	0.377	0.581	0.962	1.4		3.646	0.439	1.141	0.207	1.779	0.505	0.737	0.43	1.441	0.322	0.306	0.439	0.658	0.981		2.428	0.707	0.873	1.411		1.866	0.564	0.479	0.761	0.492	0.491	0.388	0.62		1.405	1.256	1.666	1.204	0.851
	1.841	1.651	1.784	0.43	1.385	0.957	0.959	0.462	2.58	0.361	0.365	0.433	1.875	0.731		2.433	1.46	2.167	1.593	2.807	0.595	0.204	0.204	1.861	1.313	0.551	0.387	0.904	0.886		1.004	2.075	1.073	0.78		2.064	0.821	0.525	0.448	1.369	0.462	1.39	0.809		2.664	2.632	1.338	1.098	0.276
	0.844	0.665	1.805	0.102	1.582	0.408	1.496	0.404	1.228	0.485	2.744	0.626	0.433	0.721		0.686	1.721	1.372	1.792	1.68	1.558	0.387	0.534	0.861	0.521	0.347	0.552	0.577	1.056		0.677	1.588	0.91	1.053		2.048	0.6	0.329	0.47	1.494	0.493	0.851	0.756		0.534	1.845	1.71	1.204	0.64
	0.714	0.826	0.505	2.297	1.084	1.069	0.47	0.332	0.439	0.652	1.804	0.548	1.807	0.62		1.14	1.424	2.152	1.613	0.563	1.369	0.26	0.228	0.485	0.194	0.332	0.549	1.165	0.871		1.329	2.728	0.868	0.258		1.391	0.851	2.582	0.616	0.677	0.552	2.135	1.126		1.665	2.181	1.018	1.261	0.424
	0.684	1.276	1.318	1.761	1.004	0.616	2.503	0.329	0.71	0.329	0.944	0.377	1.126	0.841		2.523	0.365	1.638	0.388	0.557	1.805	0.277	0.434	0.392	0.368	0.349	0.848	0.646	0.908		0.645	1.437	1.99	1.489		1.054	1.737	0.787	0.196	0.892	0.456	2.034	0.439		1.66	2.226	0.712	2.604	0.347
	1.942	1.516	0.324	1.14	1.422	0.686	1.942	0.394	1.35	0.806	1.581	0.671	0.908	0.887		3.545	0.68	1.46	1.11	0.614	1.543	0.349	0.228	1.001	0.306	0.26	0.347	1.487	0.684		0.837	1.187	1.516	1.002		1.734	2.258	1.306	0.377	1.065	0.476	0.94	0.774		0.684	0.645	1.712	1.907	0.564
	2.04	1.336	0.949	1.168	1.297	0.581	0.537	0.277	2.065	0.196	0.806	0.434	0.898	0.777		1.103	0.678	2.004	2.121	0.745	0.97	0.517	0.433	0.847	0.434	0.277	0.292	1.35	1.183		0.775	1.784	1.82	0.839		2.291	0.952	1.194	0.88	0.987	0.904	1.487	0.777		0.767	0.735	1.372	0.548	0.394
	1.937	1.279	1.482	1.604	1.02	0.593	0.534	0.413	0.69	0.196	0.867	0.781	0.854	1.01		1.948	1.189	1.962	0.686	1.236	1.989	0.368	0.462	0.987	0.332	0.292	0.306	0.824	0.787		0.207	0.525	1.082	0.987		2.272	1.637	1.457	0.399	1.375	0.297	2.066	1.04		0.707	0.707	0.689	1.261	0.551
	0.89	1.256	0.822	0.752	0.816	0.678	0.643	0.488	1.226	0.337	0.501	0.207	1.064	0.877		1.118	0.826	0.689	0.848	1.755	1.367	1.002	0.332	1.174	0.377	0.361	0.413	1.183	0.62		1.724	0.484	1.444	1		1.644	1.096	0.387	0.465	0.129	0.456	0.949	1.252		0.608	0.665	0.51	1.643	0.368
	0.952	1.695	1.01	0.982	0.777	0.767	0.534	0.424	1.025	0.479	0.917	0.288	0.658	0.577		1.419	1.763	0.581	0.593	1.186	1.864	0.43	0.419	0.698	0.564	1.413	0.502	0.822	0.52		0.492	0.6	1.985	1.33		0.769	1.677	0.51	0.216	0.759	0.404	1.11	0.377		1.197	1.739	0.955	0.491	0.306
	0.226	2.551	0.78	1.126	0.725	0.635	1.341	0.424	1.586	0.534	2.397	0.277	1.852	0.324		0.935	1.682	1.718	0.322	1.375	0.987	0.484	0.322	1.428	0.492	1.026	0.182	1.46	0.698		2.786	1.567	1.935	1.194		2.3	1.757	0.116	0.413	0.349	0.563	0.502	0.549		0.636	2.392	2.933	0.742	0.548
	1.712	1.4	0.485	1.839	1.542	1.184	0.571	0.433	1.112	0.233	0.343	0.207	1.866	0.78		1.697	1.385	0.662	0.737	1.632	0.837	0.392	0.368	1.072	0.721	0.91	1.053	1.14	1.446		1.561	0.453	1.677	2.234		1.416	1.506	0.581	0.549	0.26	0.735	1.962	0.827		0.785	0.476	1.033	0.62	0.228
	1.516	1.271	1.854	1.232	1.169	1.112	0.549	0.488	1.122	0.292	0.844	0.94	0.476	1.56		1.807	1.929	1.437	1.724	0.613	1.642	0.376	0.73	0.68	0.361	0.274	0.731	1.442	1.053		0.923	1.197	2.646	1.396		2.041	0.664	0.949	0.419	0.493	0.448	2.011	0.775		0.91	0.493	1.635	1.573	0.549
	1.343	0.58	0.957	1.231	1.616	1.174	0.439	0.319	1.807	0.368	1.05	0.343	1.87	0.563		1.012	0.736	1.02	1.411	1.829	0.276	0.665	0.322	0.581	0.252	1.265	0.388	0.639	0.993		0.75	1.789	1.288	1.155		1.879	1.05	0.349	0.88	0.865	0.332	0.868	1.234		1.471	0.949	1.935	1.469	1.284
	1.385	1.174	1.62	0.549	1.519	1.163	0.394	0.297	1.557	0.479	0.721	0.337	1.272	1.012		1.89	0.989	1.018	0.708	0.725	0.972	0.332	0.399	0.798	0.448	0.517	0.662	0.887	2.02		1.644	1.968	1.269	1.496		1.118	1.064	0.388	0.797	1.714	0.453	0.678	1.012		2.567	1.92	1.128	1.569	0.388
	0.645	1.511	1.35	1.4	2.025	1.284	1.779	0.532	1.583	0.304	1.673	0.246	0.923	0.434		1.67	1.024	1	0.937	0.673	0.871	0.332	0.408	0.689	0.42	0.581	0.549	1.193	0.635		1.012	1.92	1.264	1.578		3.528	1.169	0.854	0.388	0.392	0.623	1.145	0.742		0.501	0.708	0.985	0.987	0.365
	1.385	0.488	2.102	0.993	0.491	1.587	0.781	0.485	0.781	0.39	0.322	0.252	1.061	0.361		1.674	2.497	2.386	0.662	0.62	1.034	0.324	1.025	1.209	0.479	0.349	0.377	0.913	0.841		2.12	0.868	1.034	1.082		1.968	1.672	1.864	0.504	1.042	0.347	0.929	0.52		1.583	1.677	0.939	0.88	0.324
	1.276	1.501	0.479	1.596	0.958	0.981	1.2	0.276	2.914	0.204	0.404	0.343	1.704	0.52		1.755	0.593	1.784	1.419	0.791	1.442	0.404	0.29	1.56	0.288	0.517	0.343	1.096	0.29		1.959	1.169	0.485	0.798		1.898	1.542	1.791	0.297	0.29	0.424	0.42	0.39		2.392	2.258	1.212	0.394	0.304
	0.851	1.285	2.136	0.571	1.826	1.482	0.829	0.288	1.14	0.246	1.929	0.449	2.421	0.449		1.156	0.806	1.871	1.244	1.356	0.252	0.097	0.332	0.47	0.491	0.399	0.188	1.477	1.045		1.94	1.869	0.456	1.326		1.98	1.567	0.753	0.759	0.665	0.476	1.165	0.571		3.172	1.108	0.376	0.868	0.62
	0.798	1.053	0.937	1.306	1.533	0.616	1.581	0.868	0.645	0.297	1.402	0.43	1.549	0.42		1.088	1.234	1.799	1.156	1.058	2.151	0.812	0.361	0.399	0.304	0.721	0.413	1.261	1.183		2.617	1.388	0.462	0.942		1.451	1.637	0.62	0.817	0.982	0.434	0.479	0.361		1.956	1	2.218	0.716	0.822
	1.588	0.735	1.053	0.904	0.742	1.346	0.735	0.129	0.898	0.394	1.564	0.645	1.501	0.581		2.331	1.372	0.634	0.69	1.929	1.542	0.673	0.476	0.859	0.337	0.347	0.318	1.208	0.767		1.278	1.453	1.05	0.521		1.688	1.729	0.614	0.43	1.729	0.297	1.148	0.648		1.63	0.897	0.721	1.058	0.322
	1.129	0.504	1.271	1.719	0.645	1.028	1.369	0.549	1.442	0.996	1.316	0.292	2.342	1.406		0.857	1.512	0.356	0.608	1.265	0.529	0.196	0.456	1.536	0.204	0.868	0.318	1.212	0.602		0.581	0.714	1.457	1.529		2.137	1.193	1.161	0.292	0.42	0.439	0.752	1.049		0.976	0.658	1.887	1.327	0.574
	1.65	1.193	0.806	1.151	2.39	0.228	1.484	0.252	1.144	0.465	1.638	0.404	1.328	0.822		1.5	1.33	1.073	2.045	1.241	1.231	1.03	0.252	1.271	0.343	0.42	0.42	0.944	1.193		2.817	0.304	1.46	1.91		2.193	0.812	1.494	0.365	1.034	0.534	0.798	0.898		1.143	0.525	1.244	0.851	0.479
	0.297	1.985	0.97	1.306	1.197	1.061	0.493	0.745	2.6	0.228	1.549	0.51	1.126	1.241		1.703	1.356	0.814	1.209	1.359	0.958	0.329	0.664	1.145	0.388	0.635	0.368	1.003	1.241		1.512	0.645	1.637	1.305		1.612	2.02	0.376	0.665	1.514	0.258	1.532	0.894		2.784	0.909	0.648	0.485	0.394
	0.388	0.332	1.737	2.165	1.94	1.232	1.37	0.408	0.791	0.929	0.174	0.456	1.131	0.504		1.46	1.894	2.091	1.181	0.847	1.268	0.376	0.399	0.476	0.388	0.479	0.297	1.126	1.916		1.839	0.276	1.56	0.756		1.567	1.226	0.292	0.356	0.807	0.29	1.256	0.752		3.125	0.861	0.337	0.361	0.399
	0.9	0.64	0.809	1.968	1.542	0.462	0.479	0.347	0.516	0.47	0.767	0.318	1.402	1.056		1.347	1.839	2.222	0.453	0.557	1.506	0.404	0.356	0.216	0.235	0.434	0.449	1.591	1.197		2.136	0.848	1.165	1.33		1.745	1.666	0.42	0.258	0.887	0.808	0.704	0.404		2.168	2.901	0.563	0.476	0.78
	1.612	1.879	1.226	1.335	2.952	1.252	1.236	0.288	0.433	0.228	0.517	0.595	1.669	1.111		0.937	1.073	1.126	1.775	0.501	1.226	0.439	0.439	0.433	0.361	0.479	0.404	0.595	0.574		2.237	1.03	1.632	2.041		0.942	0.595	1.441	0.246	0.68	0.504	1.324	0.89		1.903	2.545	1.154	0.376	0.439
	1.853	1.409	1.536	1.734	2.064	0.777	1.336	0.433	0.492	0.504	0.737	0.349	0.332	1.597		1.397	0.966	1.691	1.524	1.145	1.487	1.542	0.501	1.298	0.365	0.322	0.476	1.408	1.31		1.775	1.503	1.999	1.557		1.361	0.525	0.534	0.274	0.736	0.456	1.542	0.449		0.871	2.707	0.972	1.327	0.504
	0.968	0.979	1.543	0.993	1.604	0.698	1.136	0.235	1.628	0.174	1.219	0.343	1.2	0.653		2.415	1.012	0.812	1.103	0.465	0.462	0.71	0.822	1.091	0.368	0.903	0.449	1.284	1.893		1.418	0.982	1.368	0.785		1.387	1.235	0.635	0.266	0.698	0.912	0.826	0.616		1.623	2.805	0.75	1.347	0.26
	1.985	0.324	1.973	1.189	0.277	0.917	1.252	0.439	0.614	0.276	1.236	0.42	0.929	0.981		1.775	2.959	1.643	0.904	0.216	0.68	1.717	0.29	1.746	0.593	0.458	0.47	1.336	1.205		1.387	0.388	0.581	1.739		1.417	0.557	0.735	0.347	1.189	0.394	1	0.839		1.306	0.962	0.968	1.396	0.42
	1.214	0.413	1.839	1.14	0.793	0.368	1.76	0.985	0.968	0.26	1.852	0.318	1.161	0.931		1.01	1.076	0.94	1.546	1.471	1.462	1.387	0.368	0.404	0.504	0.387	0.458	0.806	1.347		2.925	2.442	0.71	0.807		1.082	1.653	1.471	0.653	0.904	0.376	1.458	0.365		1.884	1.047	1.169	1.496	0.365
	0.851	1.356	1.63	1.163	1.128	0.448	1.431	1.356	1.284	0.456	1.259	1.348	0.589	1.01		1.942	1.356	0.985	0.365	0.877	1.484	1.144	0.361	0.935	0.164	0.394	0.297	0.793	1.512		1.033	1.936	1.904	0.981		1.378	1.775	1.665	0.829	0.484	0.492	1.091	0.462		1.781	1.452	1.68	1.226	0.742
	1.241	1.501	2.096	1.839	1.296	0.525	1.731	0.537	0.479	0.306	2.264	0.297	0.868	0.944		1.143	2.322	1.601	1.771	0.662	1.217	0.516	0.388	0.649	0.306	0.349	0.563	0.97	1.076		1.52	2.193	0.78	1.607		1.195	1.065	1.422	0.898	1.755	0.541	1.474	0.759		2.05	1.074	1.313	1.574	0.78
	1.348	1.008	1.209	1.67	0.728	1.502	0.712	0.434	0.593	0.368	2.161	0.595	0.665	0.781		0.817	2.63	0.822	1.406	2.418	0.322	1.278	0.304	0.649	0.801	0.322	0.376	1.047	0.785		1.888	1.316	1.563	1.129		1.757	0.725	1.047	0.235	2.291	0.529	1.444	0.871		1.405	0.645	0.814	0.769	0.517
	1.485	0.908	0.433	0.777	1.258	1.839	1.559	0.484	1.082	0.297	1.69	0.62	0.665	1.506		0.677	1.852	2.904	0.448	1.318	1.333	1.278	0.304	0.908	0.216	0.993	0.322	1.05	1.635		1.3	1.432	1.471	1.091		1.474	1.834	1.46	0.304	0.684	0.458	1.615	0.347		1.02	1.33	0.521	1.104	0.725
	2.063	1.714	0.695	1.013	0.484	0.71	0.652	0.368	1.053	0.439	0.775	0.671	1.258	0.532		0.571	0.665	1.428	0.614	1.518	1.87	0.492	0.574	0.626	1.302	1.136	0.164	0.847	0.996		1.451	2.582	0.935	1.216		1.553	0.736	2.152	0.812	1.214	0.806	1.226	0.493		1.945	1.324	0.736	1.613	0.448
	2.158	2.096	0.439	0.949	1.56	0.589	0.297	0.116	0.439	0.246	2.505	0.449	1.396	0.812		1.71	0.492	1.013	1.143	2.157	1.749	0.26	1.061	0.501	0.276	1.01	0.548	1.304	1.033		2.157	2.001	1.056	0.877		1.306	1.551	0.39	0.356	1.516	0.462	0.456	0.707		1.575	2.309	1.419	0.909	0.581
	0.678	1.261	1.39	1.076	0.549	0.725	0.798	0.304	0.78	0.534	1.14	0.563	0.838	0.814		1.313	1.013	1.621	1.04	1.559	1.601	0.571	0.329	0.368	0.277	0.735	1.261	0.976	0.775		1.965	1.714	1.163	1.136		1.724	1.304	1.313	0.196	1.239	0.42	1.458	0.521		1.533	0.897	2.872	0.886	0.745
	1.01	0.392	1.518	1.29	0.822	1.197	1.564	0.41	1.503	0.347	1.126	0.548	0.635	0.905		1.148	1.097	0.636	0.322	1.904	1.354	0.662	0.304	0.419	0.252	0.484	0.252	1.103	1.393		1.432	2.444	1.729	1.97		1.673	1.118	1.126	0.39	0.753	0.388	1.145	0.332		1.194	0.838	1.186	1.165	0.955
	1.5	0.708	1.064	0.989	1.467	0.968	1.574	0.116	0.434	0.174	1.4	0.297	0.329	1.348		0.683	1.29	0.649	1.04	1.909	0.64	0.413	0.388	0.388	0.277	0.504	0.491	1.211	1.72		1.431	0.43	1.258	1.323		2.167	1.846	1.826	0.304	0.721	0.433	1.516	1.097		0.525	1.612	1.347	1.717	0.848
	2.005	1.177	0.75	1.008	0.987	1.573	0.887	0.368	0.534	0.593	2.065	0.288	1.143	0.972		1.935	1.342	2.191	0.753	1.144	1.165	0.26	0.377	1.556	0.304	0.42	0.548	0.26	0.664		0.777	0.71	3.132	0.826		2.032	1.71	0.769	0.347	0.456	0.246	1.402	0.968		1.025	0.822	1.02	1.647	0.356
	2.204	1.042	2.506	0.485	0.859	0.847	0.745	0.39	0.517	0.387	1.503	0.322	0.47	0.484		1.369	2.317	0.867	0.981	1.156	1.638	1.056	0.252	0.93	0.228	0.71	0.439	0.775	0.812		0.892	0.51	1.635	0.581		1.875	0.678	0.462	0.361	0.516	0.451	0.708	0.949		1.025	1.245	0.775	1.347	0.196
	2.044	1.529	1.62	1.118	1.326	0.708	0.502	0.449	2.106	0.332	1.197	0.319	1.688	1.29		2.122	1.269	0.787	1.226	1.122	1.898	0.665	0.368	0.479	0.361	0.896	0.456	0.918	0.89		1.342	2.463	0.962	0.614		1.471	0.665	0.032	0.673	0.574	0.537	1.453	1.194		1.039	1.575	1.245	1.587	0.332
	1.133	1.588	2.355	1.968	1	1.29	0.905	0.216	1.474	0.26	1.232	0.652	0.207	0.917		1.968	0.949	1.259	0.806	0.806	0.689	0.516	0.484	0.347	0.355	1.379	0.318	1.081	1.189		1.183	0.322	0.69	1.87		0.985	1.428	1.141	0.347	0.376	0.725	1.775	1.045		1.418	1.232	2.234	1.111	0.337
	1.736	1.612	1.665	2.021	1.058	0.648	1.904	0.365	0.64	0.26	0.589	0.41	2.24	1.31		1.313	1.405	2.036	1.084	1.367	1.901	1.05	0.525	0.937	0.555	0.484	0.502	1.103	0.653		1.277	0.581	0.769	0.731		0.937	1.234	1.893	0.41	0.577	0.419	1.596	0.626		1.818	0.775	0.623	1.129	0.368
	0.975	1.952	1.11	0.377	1.145	1.163	0.616	0.534	0.635	1.136	1.504	0.361	2.093	1.128		1.4	1.195	1.125	0.274	1.419	0.767	0.322	0.129	0.742	0.571	0.616	0.492	1.096	1.328		1.729	2.135	0.577	1.356		0.769	1.575	1	0.424	1.734	0.737	1.644	0.69		2.592	0.653	1.02	1.788	0.424
	2.337	1.949	0.574	0.653	1.396	0.962	0.356	0.164	0.525	0.324	1.31	0.355	1	0.612		1.437	1.637	0.753	2.198	2.323	1.298	0.377	0.228	2.44	0.456	0.871	0.529	1.408	0.51		1.658	0.812	0.935	0.636		1.518	2.322	0.505	0.388	0.735	0.62	1.04	0.708		1.575	1.131	1.4	1.477	0.434
	0.987	1.655	1.226	1.012	0.903	0.822	0.462	0.216	0.797	0.288	2.072	0.602	1.543	0.881		2.35	1.292	2.323	0.765	1.52	1.876	0.595	0.276	1.123	0.91	0.548	0.653	1.118	0.233		1.2	2.05	1.14	0.949		1.806	1.322	1.02	0.226	0.785	0.413	0.404	0.787		1.291	2.407	1.529	0.824	0.322
	1.261	2.478	1.226	1.072	1.096	0.698	1.388	0.42	1.87	0.318	1.219	0.841	0.462	0.581		3.972	0.742	1.638	1.496	0.42	0.752	0.39	0.484	1.393	0.258	0.735	0.434	1.026	1.543		2.347	0.775	1.578	0.728		0.377	1.187	1.387	0.377	0.555	0.42	1.905	0.606		1.173	1.906	0.873	1.463	0.355
	1.805	1.049	1.285	1.673	0.929	1.01	0.258	0.502	1.236	0.343	0.343	0.686	1.156	0.548		1.923	0.892	0.968	2.041	0.484	1.674	0.626	0.458	0.408	0.377	0.987	0.808	1.276	1.756		1.03	1.236	1.369	0.557		1.378	1.168	0.297	0.361	0.52	0.233	1.33	0.797		1.607	1.393	0.769	0.851	0.552
	0.728	0.91	1.42	1.971	2.198	0.894	1.569	0.368	1.432	0.252	0.51	0.322	0.408	1.155		1.548	1.163	1.658	0.793	0.756	0.962	0.196	0.29	0.571	0.26	0.322	0.492	1.683	2.215		2	1.613	1.935	1.648		1.99	0.448	1.074	0.413	1.544	0.462	0.905	0.361		2.351	0.716	1.065	0.837	0.529
	1.195	0.653	0.761	1.118	2.51	0.329	0.347	0.297	0.775	0.649	0.376	0.47	0.876	1.03		1.285	1.271	2.36	1.732	0.859	1.241	1.252	0.343	0.343	0.226	0.78	0.502	1.084	1.82		1.791	0.71	1.714	1.791		0.847	1.432	0.399	0.274	0.448	0.324	0.981	1.29		0.534	1.516	1.53	1.186	0.266
	0.752	0.678	0.696	1.797	0.841	1.03	0.648	0.399	0.64	0.537	0.871	0.288	1.064	0.453		1.081	2.33	1.542	1.627	1.069	0.581	0.488	0.491	0.62	0.226	0.52	0.563	0.419	1.347		1.929	1.989	1.463	1.428		0.968	1.588	0.643	0.69	0.322	0.52	1.936	0.322		0.347	0.355	0.801	0.935	0.319
	2.409	0.71	1.424	0.721	0.349	0.449	0.571	0.476	0.297	0.133	0.707	0.332	0.51	0.42		1.053	1.278	1.624	1.118	1.148	1.763	0.456	0.343	0.449	0.387	0.787	0.304	0.492	0.913		2.274	2.222	1.33	1.707		1.82	1.358	0.484	0.602	0.88	0.912	2.075	0.394		1.029	1.039	1.265	1.682	0.58
	2.903	0.742	1.415	1.354	1.68	0.646	0.297	0.322	0.873	0.196	1.033	0.26	0.188	0.388		1.269	1.395	0.419	1.278	1.551	1.05	0.571	0.343	1.2	0.337	0.368	1.068	1.103	0.721		0.716	1.072	1.091	1.066		1.551	2.052	1.305	0.485	1.226	0.297	0.897	0.636		0.574	1.586	0.439	1.327	0.646
	1.942	0.433	1.354	1.169	1.744	1.033	0.537	0.388	0.404	0.564	0.616	0.332	0.394	0.476		0.756	0.424	1.026	2.433	1.053	1.264	0.867	0.456	0.394	0.785	0.42	0.394	0.343	0.71		1.989	1.11	1.98	1.073		1.356	1.836	1.648	0.377	1.373	0.388	0.671	0.51		0.721	2.487	2.512	0.456	0.276
	1.082	1.054	2.226	0.68	1.827	0.43	1.098	0.216	1.3	0.595	0.51	0.577	2.491	0.51		2.669	1.197	1.952	1.646	1.097	1.053	0.678	0.361	0.52	0.388	0.626	0.439	0.728	0.806		1.289	0.595	1.524	0.942		1.322	1.807	0.78	0.504	1.463	0.548	0.838	0.716		2.528	1.316	0.529	1.047	0.347
	1.426	0.52	1.091	1.504	1	0.922	0.692	0.322	1.326	0.306	1.118	0.484	0.462	0.462		1.245	0.677	1.235	0.636	0.465	1.488	0.983	0.458	0.368	0.204	0.434	0.419	0.476	0.707		0.918	0.75	0.777	1.151		1.717	1.212	0.424	0.462	0.419	0.492	1.195	0.304		1.559	1.815	1.348	1.494	0.451
	1	0.859	0.64	1.792	0.822	1.103	0.807	0.332	1.56	0.434	0.574	0.274	0.975	0.448		0.851	2.121	1.219	1.774	0.913	0.935	1.028	0.319	0.812	0.759	0.584	1.737	0.458	0.677		1.432	2.05	0.392	1.378		0.737	1.261	1.326	0.652	0.886	0.806	0.742	1.324		1.378	1.897	0.439	1.082	0.504
	1.186	1.406	0.196	1.451	0.797	1.05	0.958	0.116	0.42	0.355	1.743	0.648	1.232	1		0.904	1.791	1.013	1.228	1.89	1.097	0.822	0.233	1.131	0.388	0.69	0.555	0.376	0.937		0.399	1.968	1.39	1.241		1.734	1.226	1.058	0.643	0.942	0.343	1.621	0.306		1.597	1.964	1.195	1.228	0.332
	2.112	0.658	0.904	0.798	0.748	1.355	0.502	0.574	1.897	0.847	1.432	0.355	2.05	1.361		1.305	0.742	0.822	1.48	1.226	0.807	0.581	0.347	0.525	0.465	0.616	0.394	1.161	0.848		0.816	1.313	0.905	1.088		2.294	2.191	0.742	0.419	0.909	0.448	1.785	0.775		0.645	2.286	1.123	2.108	0.484
	1.101	1.102	2.165	0.877	1.28	1.361	0.458	0.39	1.963	0.322	1.082	0.29	1.244	0.456		1.528	1.948	1.472	1.53	1.548	0.806	1.417	0.462	0.448	1	0.456	1.284	0.686	0.502		0.595	0.355	1.942	1.025		1.899	1.053	0.368	0.39	1.214	0.488	1.045	0.958		0.26	1.084	1.66	0.476	0.476
	1.415	1.504	1.489	1.511	1.428	0.942	0.462	0.555	1.432	0.304	1.359	0.484	1.186	0.959		1.39	0.94	0.806	1.392	0.97	0.451	0.451	0.549	0.491	0.502	1.836	0.462	0.62	0.595		1.004	0.767	1.272	0.653		1.184	0.913	0.465	0.365	1.306	0.832	1.489	0.774		1.88	2.077	1.221	0.449	0.368
	0.207	1.396	1.551	0.564	0.52	1.276	1.313	0.204	0.968	0.228	0.917	0.529	0.737	0.949		1.259	1.241	1.136	1.582	1.372	0.868	0.985	0.306	0.968	0.923	0.046	0.462	1.261	1.399		0.886	1.387	1.471	0.851		0.725	1.098	0.549	0.433	1.803	0.593	2.309	0.608		0.707	0.908	0.731	1.61	0.877
	1.984	1.347	1.54	0.491	1.593	1.284	1.158	0.376	2.165	0.319	0.368	0.584	1.846	1.03		2.111	1.069	0.529	0.793	0.492	1.571	0.456	0.387	0.684	0.235	0.785	0.297	0.871	0.521		0.419	1.141	1.31	0.521		1.241	1.426	0.274	0.462	0.581	0.404	1.332	0.742		2.065	1.487	1.318	1.542	0.653
	0.707	0.909	2.024	1.792	1.725	0.589	0.829	0.434	1.4	0.304	0.274	0.557	1.113	0.413		1.887	0.838	1.697	1.861	1.373	1.323	0.26	0.42	0.595	0.29	0.58	0.662	0.725	0.673		0.453	1.088	1.081	0.62		2.085	0.433	0.94	0.424	0.548	0.479	0.962	0.188		1.276	3.065	0.949	0.922	0.584
	1.14	1.118	0.696	1.665	1.631	1.502	0.449	0.433	0.73	0.42	1.305	0.424	0.953	1.082		1.232	2.024	1.601	2.167	0.347	1.449	0.78	0.337	0.361	0.501	0.577	0.614	0.868	1.136		1.688	0.394	0.929	1.55		1.4	1.913	1.008	0.343	0.892	0.549	0.894	0.935		1.323	0.908	0.871	0.847	0.555
	1.656	1.361	0.996	0.937	0.975	0.392	0.502	0.488	0.595	0.297	1.125	0.319	1.056	0.188		0.584	0.913	1.935	2.044	0.194	1.072	0.439	0.505	1.276	0.26	1.496	0.322	1.03	1.506		0.753	0.968	2.628	1.128		2.656	1.806	2.183	0.434	0.88	0.78	2.091	0.571		2.042	1.054	1.887	1.656	0.537
	1.186	2.246	1.53	0.886	0.968	0.698	1.082	0.361	0.787	0.292	1.714	0.488	1.378	0.817		0.931	0.626	1.169	1.949	1.461	0.822	1.261	0.52	1.356	0.767	0.376	0.944	0.735	1.145		1.521	1.779	1.533	2.235		1.194	1.064	0.491	0.388	0.748	0.646	1.805	0.388		1.52	1.734	0.614	1.198	0.43
	2.129	1.04	0.841	1.414	1.771	0.517	1.487	0.439	1.367	0.51	1.962	0.318	1.341	0.592		1.863	0.439	1.582	1.557	1.761	0.52	1.013	0.653	1.354	0.501	0.399	0.419	0.807	1.252		1.71	0.662	1.616	1.347		1.665	1.791	1.004	0.356	0.975	0.377	2.109	0.501		1.644	1.118	0.731	1.567	0.376
	1.548	0.949	2.122	0.439	0.485	0.923	0.756	0.394	0.868	0.376	1.512	0.292	1.306	0.949		1.945	0.68	1.517	0.479	2.149	0.626	1.025	0.277	1.169	0.216	0.492	0.505	1.183	1.324		0.841	0.826	1.548	1.406		1.615	0.419	1.784	0.448	1.408	0.337	1.662	0.645		0.868	1.737	1.054	1.307	0.413
	2.199	1.553	1.647	0.753	0.937	0.88	1.029	0.424	0.52	0.634	1.173	0.399	0.71	1.582		1.862	1.848	2.29	0.807	2.122	1.228	0.318	0.306	0.942	0.368	0.52	0.547	0.94	1.925		1.938	0.39	0.752	1.474		2.29	0.97	1.714	0.612	1.406	0.388	1.995	0.394		1.316	1.438	0.537	1.737	0.349
	0.904	1.967	1.816	1.846	1.65	1.029	0.924	0.349	1.624	0.408	1.276	0.516	1.342	0.581		0.942	2.408	1.42	1.219	1.533	0.71	0.297	0.355	1.11	0.368	0.616	0.695	1.096	1.322		1.879	0.388	1.305	1.749		1.745	2.229	0.361	0.456	1.212	0.731	1.573	0.462		1.575	1.14	1.707	1.44	0.349
	1.792	0.847	1.324	1.841	2.434	0.868	1.742	0.188	1.028	0.404	0.809	1.096	0.51	0.69		1.898	1.582	2.048	1.601	2.069	0.626	0.332	0.133	0.761	0.504	0.908	0.534	0.88	1.841		1.813	0.922	0.881	1.748		1.217	1.369	1.074	0.39	1.778	0.748	1.241	0.6		2.165	2.113	1.174	1.368	0.355
	1.165	1.431	1.529	1.821	1.193	0.51	1.026	0.42	1.024	0.319	1.593	0.807	0.765	0.774		0.837	1.553	1.959	2.308	1.034	1.326	0.9	0.297	0.534	0.581	0.649	0.448	1.128	0.785		1.593	0.809	2.356	0.924		1.379	1.347	0.777	0.292	0.877	0.581	2.015	0.404		2.426	1.284	2.084	1.05	0.563
	1.714	1.313	2.116	0.665	1.688	1.29	0.714	0.52	1.103	0.451	1.361	0.577	0.987	1.258		0.636	1.604	0.612	1.69	1.03	0.912	0.658	0.304	1.072	0.424	0.343	1.511	0.765	0.753		0.844	0.838	1.761	1.073		0.942	1.428	1.291	0.816	1.002	0.91	1.221	0.479		1.354	1.091	0.52	0.73	0.288
	1.521	0.246	0.881	1.458	1.458	0.94	1.025	0.274	1.05	0.322	0.43	0.826	1.284	0.548		0.841	1.336	0.962	1.627	0.981	1.933	0.841	0.226	1.71	0.716	0.485	0.51	1.387	0.574		2.684	1.88	0.649	1.854		1.029	1.487	1.757	0.52	0.584	0.347	2.497	0.742		1.575	0.822	1.126	1.356	0.484
	1.968	1.35	1.557	0.557	1.615	0.337	0.493	0.207	1.553	0.329	1.519	0.595	1.593	0.827		0.534	1.333	1.241	1.024	0.557	0.949	0.368	0.817	1.119	0.753	0.534	0.306	1.013	1.112		1.284	1.316	1.521	0.434		0.235	1.62	0.942	0.337	0.292	0.735	1.061	0.306		1.813	0.439	2.161	0.812	0.365
	2.106	1.078	1.977	0.829	1.719	0.753	1.813	0.456	1.53	0.144	1.802	0.581	1.76	0.785		0.97	1.742	1.098	0.404	0.976	0.47	0.532	0.306	0.71	0.479	0.246	0.51	0.897	1.385		1.614	0.29	0.798	1.453		1.29	1.567	0.602	0.343	0.563	0.68	2.005	1.097		0.555	1.361	1.869	0.645	0.574
	1.126	1.284	1.647	1.236	1.52	1.484	1.098	0.376	1.437	0.479	1.899	0.304	1.567	1.581		1.449	1.409	2.052	2.44	0.716	1.66	0.387	0.329	1.183	0.453	0.551	0.91	1.467	0.635		1.48	2.081	1.359	1.48		1.724	0.277	1.338	0.419	0.517	0.476	1.819	0.767		1.444	1.557	1.346	1.305	0.993
	0.549	1.428	1.839	1.294	1.018	0.658	0.329	0.865	0.976	0.465	0.439	0.26	1.163	0.62		1.968	0.898	0.78	1.33	1.261	1.291	0.752	0.387	0.976	0.649	0.377	0.319	1.294	0.462		0.785	1.37	1.409	1.826		2.417	0.532	0.671	0.551	0.861	0.537	0.612	0.602		0.761	0.982	1.254	1.949	0.343
	1.612	0.735	1.333	1.069	0.626	0.52	1.908	0.318	0.548	0.456	0.707	0.318	1.097	0.584		0.581	2	1.511	1.566	1.073	0.958	0.476	0.322	0.555	0.26	0.62	0.678	0.332	0.356		1.126	1.98	1.14	0.809		0.748	2.165	0.652	0.228	1.012	0.975	1.173	0.537		0.944	0.777	1.008	1.98	0.593
	1.53	0.595	2.067	1.054	1.62	0.534	1.399	0.552	0.981	0.399	1.049	0.557	1.871	1.163		1.335	0.602	0.548	0.809	0.392	1.35	0.368	0.277	0.491	0.337	0.665	0.258	0.664	0.548		2.631	0.876	1.457	1.695		1.623	1.161	1.471	0.207	0.854	0.541	2.006	0.837		1.52	0.881	1.505	1.276	0.529
	0.68	1.387	0.922	0.774	1.029	0.26	1.165	0.322	0.78	0.42	0.752	0.488	1.228	0.581		2.835	1.244	1.343	1.987	2.441	1.163	0.394	0.614	0.413	0.479	0.252	1.306	0.645	0.653		1.128	2.036	1.65	0.616		2.057	1.557	0.581	0.532	1.025	0.504	2.02	0.807		1.419	1.967	1.548	0.821	0.68
	0.769	1.231	1.008	1.845	1.413	0.504	1.644	0.258	1.415	0.476	0.564	0.26	1.807	0.581		1.937	1.897	1.025	0.968	1.511	0.806	0.419	0.563	0.42	0.492	0.361	0.368	0.867	1.87		1.02	1.529	1.259	1.265		1.487	1.05	1.724	0.355	0.529	0.462	0.73	0.329		1.351	1.379	1.706	2.011	0.707
	1.898	1.244	1.272	1.02	1.776	0.814	0.47	0.258	1.402	0.332	1.746	0.419	0.69	0.937		1.683	0.814	1.101	2.354	0.266	0.976	0.979	0.343	0.476	0.319	0.492	0.571	0.626	0.658		1.042	1.4	2.255	1.013		2.106	1.462	0.595	0.252	0.29	0.769	1.904	0.745		0.419	1.232	1.122	1.804	0.745
	0.548	0.462	1.284	1.245	2.054	0.791	0.43	0.551	0.808	0.204	1.791	0.408	2.151	0.822		2.615	1.068	0.745	1.432	1.241	1.204	0.753	0.361	0.602	0.419	0.365	0.725	0.581	2.144		2.29	1.582	1.008	1.284		1.426	1.756	0.728	0.288	0.564	0.297	1.987	0.626		0.847	1.387	0.877	0.725	0.712
	1.025	0.322	1.762	1.746	0.832	0.868	1.012	0.252	1.002	0.188	0.775	0.537	1.076	0.708		2.669	1.494	0.529	2.011	1.156	1.065	0.555	0.42	0.394	0.707	0.68	0.491	0.616	0.484		1.474	0.504	0.924	0.646		1.084	2.38	1.072	0.29	0.548	0.365	1.39	1.197		1.651	2.193	0.917	0.868	0.639
	1.591	0.838	1.995	0.292	1.042	0.769	1.084	0.43	1.395	0.207	1.324	0.343	1.739	0.94		1.618	1.551	0.937	0.987	1.271	1.406	0.595	0.6	0.745	0.404	0.761	0.361	1.14	1.165		1.487	1.602	0.332	1.632		0.626	1.506	0.356	0.434	0.548	0.593	1.174	1.519		2.384	0.917	0.966	1.14	0.439
	0.735	0.908	2.106	0.797	1.905	1.053	1.44	0.479	1.258	0.274	0.332	0.968	0.456	0.476		2.124	1.504	0.42	1.453	1.235	0.62	1.372	0.462	0.504	0.413	0.51	0.479		1.288		0.936	1.524	1.069	1.335		1.485	1.604	1.296	0.571	0.484	0.51	1.779	0.759		0.52	0.52	0.491	1.322	0.525
	1.818	1.963	2.151	1.336	1.904	0.653	1.329	0.306	1.546	0.552	0.904	0.488	0.865	0.923		1.525	1.154	0.574	2.156	0.968	1.053	0.404	0.424	1.419	0.377	0.277	0.595		0.329		1.897	0.683	1.616	1.56		1.746	1.656	0.465	0.671	1.956	0.332	1.113	0.966		2.433	0.458	0.91	1.123	0.521
	1.647	1.3	0.377	1.341	1.904	0.532	0.989	0.581	1.368	0.361	1.05	1.14	0.643	0.822		1.764	1.368	1.136	0.787	1.001	0.434	0.266	0.288	1.644	0.26	0.537	0.399		0.521		1.813	1.91	2.254	0.939		0.93	1.053	0.577	0.368	1.884	0.388	0.204	0.361		2.395	0.347	1.756	1.488	0.517
	1.259	0.777	0.439	0.451	1.098	1.232	0.662	0.577	0.653	0.252	2.19	0.47	2.003	0.419		0.595	0.904	1.919	1.072	0.798	1.369	0.368	0.797	0.996	0.233	1.174	0.462		0.832		2.051	0.43	0.433	0.777		0.767	0.917	0.355	0.368	0.91	0.388	1.05	0.612		1.873	1.494	1.848	0.968	0.525
	1.807	1.528	1.442	1.558	1.344	0.517	0.634	0.394	0.491	0.322	0.725	0.658	0.501	0.678		0.639	0.847	1.234	1.809	0.923	1.385	0.937	0.408	0.808	0.388	0.844	0.652		0.564		1.621	1.52	1.112	0.606		2.006	0.683	0.571	0.595	1.158	0.645	2.161	0.861		0.404	1.576	0.868	1.05	0.653
	1.438	1.252	1.008	2.131	1.774	0.777	1.232	0.274	1.945	0.246	1.155	0.439	1.599	0.814		1.673	2.552	2.144	1.551	0.909	0.94	0.736	0.292	1.169	0.26	0.361	0.337		0.595		1.041	1.665	1.072	0.982		1.187	0.634	0.297	0.462	0.39	0.51	1.968	0.394		0.913	1.375	0.923	1.632	0.552
	1.899	1.33	1.491	1.91	0.62	1.156	1.165	0.394	1.356	0.355	0.689	0.26	1.615	0.439		1.346	0.645	1.789	1.133	2.011	1.807	0.102	0.404	0.476	0.377	0.646	0.456		0.797		2.387	0.564	0.695	0.716		2.235	2.229	1.272	0.439	1.387	0.388	1.583	0.491		0.806	1.632	2.19	1.485	0.608
	1.789	2.138	1.183	0.639	1.368	1.742	1.236	0.174	0.525	0.288	1.255	0.737	1.762	0.592		1.002	0.704	0.736	0.347	1.415	0.571	0.824	0.365	0.917	0.216	1.033	0.439		0.753		1.977	1.197	1.623	0.777		2.221	1.129	1.072	0.456	0.935	0.388	0.725	0.376		1.737	1.615	1.762	1.69	0.324
	1.628	1.848	0.957	0.892	2.461	0.652	1.642	0.228	1.163	0.347	0.952	0.356	0.62	1.56		0.593	1.197	1.437	1.575	1.463	1.471	1.428	0.534	1.682	0.408	0.822	0.479		0.942		1.937	2.63	1.395	1.604		1.923	1.542	0.673	0.258	0.844	0.462	1.442	0.549		1.227	0.485	0.996	0.595	0.465
	1.204	2.3	1.845	2.042	1.71	0.51	0.449	0.226	1.569	0.868	1.569	0.404	1.226	1.072		1.002	1.056	0.769	1.469	1.103	0.233	0.548	0.563	1.29	0.361	0.458	0.424		1.3		2.192	2.227	1.254	1.714		1.719	0.456	0.937	0.549	0.753	0.387	1.053	0.829		1.385	0.549	0.841	2.354	0.602
	1.904	0.649	2.111	1.292	1.446	0.649	0.753	0.337	1.646	0.532	0.549	0.595	0.765	0.501		1.346	1.968	0.649	1.336	0.839	1.072	1.582	0.26	0.962	0.235	0.837	0.266		0.355		1.508	0.324	0.785	1.469		1.297	0.859	0.698	0.476	0.62	0.448	0.634	0.623		0.555	0.871	1.174	0.233	0.456
	0.841	1.066	1.925	1.888	2.39	0.809	1.4	0.392	0.355	0.593	1.511	0.388	1.214	1.437		1.3	3.314	1.788	0.492	0.712	0.731	1.074	0.306	0.844	0.368	0.581	0.318		2.065		0.728	1.235	1.378	1.032		1.848	0.775	1.279	0.439	0.785	0.548	0.549	0.329		0.923	1.811	1.755	1.87	0.504
	1.28	1.506	0.852	1.703	1.119	0.653	1.229	0.42	1.529	0.731	1.51	0.377	1.039	0.987		1.154	0.959	2.498	1.601	1.097	1.208	0.798	0.277	0.75	0.188	0.394	0.304		0.924		1.335	2.202	2.052	1.306		1.295	0.912	0.844	0.297	0.761	0.456	0.962	1.074		2.806	1.241	1.163	0.904	0.392
	0.812	1.061	0.504	1.3	1.042	0.871	1.004	0.563	0.537	0.368	0.867	0.392	0.816	1.163		0.871	0.78	2.284	1.31	2.291	1.472	0.571	0.318	0.923	0.29	0.306	0.516		0.419		1.378	1.807	1.551	1.444		0.549	0.993	0.571	0.347	0.785	0.419	0.332	0.775		0.777	2.031	1.231	0.453	0.361
	1.271	1.97	1.002	1.714	1.553	0.529	0.962	0.297	1.285	0.377	1.563	0.493	1.533	1.719		0.516	1.87	1.789	1.141	2.221	1.417	0.424	0.277	2.219	0.424	0.434	0.434		0.571		0.827	0.922	1.885	1.156		0.439	1.341	0.698	0.252	0.324	0.476	1.05	0.476		2.295	1.169	1.294	1.471	0.797
	1.259	1.673	1.355	1.264	0.548	0.161	0.635	0.204	1.623	0.505	0.816	0.29	0.42	1.118		0.52	0.922	1.284	1.096	2.013	1.424	0.376	0.479	1.516	0.548	0.64	0.319		1.197		1.487	2.308	1.647	2.075		0.696	0.581	0.516	0.297	0.64	0.577	0.555	1.437		1.097	1.045	1.947	1.543	0.695
	1.2	2.024	1.601	1.724	0.42	0.652	1	0.361	1.004	0.465	0.791	0.324	0.413	1.749		1.673	0.779	1.361	1.068	1.272	0.662	0.332	0.322	0.62	0.292	0.216	0.368		0.88		2.37	2.465	1.904	0.306		1.082	1.627	0.662	0.801	0.368	0.505	0.707	1.214		1.155	0.903	1.677	1.324	0.462
	0.365	1.502	1.11	2.253	0.912		1.096	0.399	0.665	0.332	0.851	1.078	0.529	1.163		1.809	2.19	1.549	1.295	1.284	0.502	0.434	0.434	0.439	0.129	0.484	0.337		0.929		2.3	2.484	1.04	1.575		1.653	2.122	1.29	0.297	0.434	0.716	1.683	1.061		0.525	0.204	0.801	1.776	0.493
	0.807	1.37	1.271	1.961	1.414		1.347	0.392	0.801	0.322	0.968	0.51	1.58	1.348		1.096	1.864	1.774	1.369	1.978	0.797	0.534	0.484	0.355	0.42	0.492	0.266		1.241		1.364	0.871	1.843	1.703		1.033	0.645	1.776	0.616	2.034	0.646	1.431	0.51		1.638	1.169	0.775	1.123	0.563
	1.665	1.755	1.764	1.764	0.318		0.329	0.462	1.004	0.288	0.26	0.413	1.419	0.537		0.394	1.101	1.056	1.854	0.93	1.239	0.392	0.349	0.419	0.408	0.319	1.039		1.195		2.473	2.122	1.916	1.508		0.983	1.342	1.246	0.349	1.227	0.42	0.665	0.877		1.234	1.273	0.448	1.46	0.292
	0.404	0.434	1.467	1.781	0.6		2.132	0.274	0.419	0.388	0.297	0.42	1.372	0.791		1.743	2.519	0.164	1.111	1.46	1.847	0.458	0.635	0.678	0.479	1.601	0.662		1.583		1.355	1.924	1.298	0.841		1.612	0.589	0.62	0.71	1.627	0.456	0.896	0.775		0.93	0.917	0.6	1.285	0.26
	1.323	0.929	1.952	1.653	2.037		0.549	0.228	2.407	0.42	1.195	0.39	0.39	1.126		1.451	1.033	0.698	1.241	1.665	0.392	0.448	0.485	0.877	0.62	1.2	0.752		1.261		2.194	1.298	1.504	0.775		1.372	1.228	1.065	0.602	2.252	0.52	0.852	0.58		0.857	1.669	0.548	1.03	0.516
	1.112	0.745	1.784	2.512	0.752		0.595	0.399	1.834	0.304	1.388	0.516	1.133	0.376		2.174	1.393	2.409	2.04	1.592	1.229	0.368	0.671	0.62	0.465	0.306	0.439		2.091		0.525	1.462	1.777	0.774		0.742	0.801	1.255	0.419	1.933	0.304	0.458	0.71		1.322	0.548	0.857	1.068	0.904
	0.851	1.487	1.393	1.642	1.341		1.012	0.434	0.595	0.616	1.952	0.608	1.128	1.847		1.154	1.265	1.987	1.298	2.072	1.29	0.377	0.376	1.977	0.41	0.479	0.42		0.689		0.844	1.169	2.342	1.852		1.112	1.316	1.187	0.297	0.574	0.465	1.212	0.981		1.52	0.865	1.163	1.041	0.577
	0.555	1.234	2.041	1.583	0.433		0.571	0.274	0.887	0.525	0.276	0.324	1.2	0.944		1.833	2.207	1.393	0.806	0.981	1.316	0.462	0.329	1.122	0.266	0.41	0.439		0.887		1.487	1.666	1.29	1.163		2.048	1.326	1.682	0.725	0.821	0.332	1.878	0.525		2.863	1.245	1.53	1.316	0.69
	1.818	0.752	1.189	1.533	1.003		1.02	0.404	2.309	0.394	0.94	0.182	1.385	0.593		1.932	1.112	0.639	1.506	1.92	1.494	0.274	0.465	0.399	0.606	0.368	1.097		1.183		1.914	1.333	0.848	1.557		1.702	1.084	1.042	0.337	0.501	0.551	1.613	0.571		0.777	1.378	1.072	1.29	0.775
	1.411	1.432	0.848	1.807	2.121		1	0.451	2.384	0.479	1.11	0.634	0.451	1.197		1.477	0.692	1.872	1.161	1.918	1.258	0.361	0.26	1.307	0.563	0.847	0.557		1.246		0.826	2.012	1.984	1.169		1.252	1.356	0.684	0.692	0.71	0.368	0.801	0.608		1.278	1.068	1.284	1.833	0.324
	1.806	1.714	2.428	1.879	1.514		0.68	0.388	2.813	0.297	1.316	0.433	2.163	0.368		2.219	0.716	0.774	0.75	0.52	1.385	0.216	0.453	0.798	0.356	0.793	0.274		1.569		0.595	2.358	1.091	0.731		0.493	1.129	1.511	0.725	0.413	0.806	1.065	0.822		0.989	1.612	0.844	1.184	0.297
	1.245	2.27	2.18	1.644	0.78		0.716	0.42	1.484	0.626	1.056	0.368	0.683	0.645		1.908	1.129	2.496	0.753	1.378	0.517	0.349	0.453	0.479	0.408	0.612	0.534		1.258		1.516	1.033	1.414	1.012		2.011	1.234	1.521	0.684	0.673	0.704	1.347	1.197		0.626	0.534	2.575	1.489	0.42
	1.986	1.012	0.968	1.432	0.689		0.929	0.517	0.839	0.276	1.69	0.484	0.958	0.537		0.847	0.873	1.397	1.241	1.211	1.129	0.529	0.404	0.322	0.349	0.439	0.228		1.369		1.622	2.753	1.666	1.2		1.709	1.114	0.408	0.376	1.343	0.453	1.601	0.392		0.88	0.923	1.824	0.78	0.456
	1.816	1.129	1.082	1.186	2.78		0.551	0.365	0.822	0.488	2.56	0.174	0.881	0.64		3.633	1.918	1.033	0.534	0.959	0.479	0.365	0.29	0.541	0.144	0.29	0.636		0.725		1.197	0.785	1.992	1.141		1.729	1.126	0.266	0.434	1.002	0.322	0.851	0.365		1.852	1.02	0.993	1.69	0.399
	0.752	1.232	1.676	1.304	1.604		0.801	0.376	0.707	0.297	0.931	0.318	1.482	1.246		3.081	1.811	1.004	1.846	0.492	0.877	0.809	0.318	0.935	0.662	0.653	0.297		1.632		2.073	0.266	1.163	0.635		1.3	1.968	1.665	0.814	0.456	0.404	1.409	1.212		0.962	1.918	1.778	2.007	1.746
	0.698	2.124	0.564	1.583	1.99		0.646	0.376	1.148	0.343	0.73	0.337	1.582	0.917		1.489	2.192	0.774	1.971	0.465	0.827	0.548	0.51	0.777	0.376	0.987	0.439		0.394		1.529	1.771	1.415	0.492		1.227	0.91	0.361	0.584	0.616	0.721	1.158	1.484		1.034	1.976	1.409	2.065	0.767
	1.344	0.832	1.813	0.908	0.797		1.685	0.349	0.623	0.361	1.877	0.318	1.485	1.472		2.489	2.042	1.836	0.742	1.081	0.712	0.182	0.39	2.235	0.505	0.791	0.329		1.054		1.012	1.571	1.743	1.134		1.118	1.582	0.549	0.204	0.552	0.43	1.732	0.595		0.549	0.504	1.431	0.71	1.058
	2.063	1.633	1.581	0.671	0.94		1.032	0.394	0.504	0.319	1.618	0.388	0.767	0.62		0.696	1.962	0.987	1.432	1.033	1.241	0.555	0.439	0.595	0.388	1.002	0.692		1.501		0.434	0.665	1.246	1.01		0.602	1.784	0.161	0.476	0.643	0.69	1.078	0.563		1.316	1.496	1.195	1.074	0.993
	1.836	1.904	1.255	0.678	2.159		1.762	0.343	2.509	0.648	1.356	0.532	1.642	0.894		2.04	1.335	1.572	1.506	0.456	0.962	1.556	0.376	0.392	0.479	0.324	0.349		0.953		1.183	1.88	1.324	1.645		2.36	0.97	1.037	0.602	0.349	0.42	0.356	1.081		2.755	0.905	2.215	1.673	0.602
	1.187	1.013	1.417	0.492	2.488		1.197	0.392	1.516	0.347	1.338	0.376	2.181	0.581		0.913	1.653	1.71	1.04	0.62	2.151	0.322	0.376	0.516	0.392	0.93	0.376		1.644		0.571	1.596	1.307	1.278		2.85	1.618	0.529	0.413	0.52	0.753	1.033	1.103		1.457	1.136	0.549	1.591	0.448
	0.532	0.392	1.457	1.034	1.624		0.322	0.318	1.936	0.349	1.264	0.343	1.418	0.439		0.306	1.561	1.856	0.865	0.993	1.551	0.439	0.376	0.664	0.735	0.725	0.288		1.372		1.744	0.58	1.503	1.369		1.29	1.775	0.868	0.814	1.209	0.408	0.752	0.563		0.322	2.142	1.361	1.742	0.235
	1.165	1.285	1.731	0.484	1.669		1.172	0.476	1.368	0.365	2.054	0.392	1.627	0.634		0.801	1.397	1.893	1.018	1.264	1.306	0.377	1.123	0.424	0.424	0.917	0.458		0.419		0.745	2.048	0.69	1.323		0.877	0.665	1.588	0.368	0.365	0.361	2.054	0.541		1.152	1.231	1.708	1.764	0.491
	1.197	1.974	1.126	2.263	1.491		0.981	0.838	1.91	0.413	2.03	0.318	1.074	0.616		1.024	0.297	1.148	1.803	2.072	1.256	0.376	0.69	0.196	0.721	0.529	1.013		1.264		2.451	1.55	0.653	0.356		0.935	1.748	0.752	0.361	0.453	0.292	1.42	1.072		1.33	1.646	0.756	0.753	0.71
	0.534	1.846	0.646	0.826	0.996		1.05	0.297	1.816	0.322	0.731	0.419	1.417	1.144		0.47	0.626	1.623	1.058	0.563	1.172	0.793	0.392	0.797	0.324	0.832	0.602		1.604		1.675	0.548	1.581	2.193		0.824	0.9	0.696	0.52	0.399	0.332	1.371	1.134		1.737	1.396	1.186	1.97	0.394
	1.29	1.884	0.555	1.056	1.683		0.521	0.377	1.542	0.492	0.458	0.399	0.785	1		0.806	1.441	2.269	2.235	0.557	1.415	0.748	0.318	0.775	0.42	0.552	0.837		1.2		1.359	1.62	1.254	1.255		0.456	1.084	1.072	0.47	0.742	0.388	2.846	1.194		1.356	0.808	1.489	1.226	0.577
	1.064	0.917	0.368	1.143	1.437		0.952	0.228	0.665	0.643	0.449	0.387	0.868	0.525		2.156	2.417	1.665	1.457	1.145	1.809	0.465	0.71	0.462	0.277	0.844	0.574		0.785		1.971	1.665	1.676	1.168		0.439	2.006	0.877	0.662	1.095	0.781	1.607	1.28		1.141	0.962	1.55	1.288	0.492
	0.737	0.574	0.376	1.129	1.037		0.449	0.161	0.955	0.356	0.434	0.347	1.58	0.844		2.112	2.634	1.419	0.652	1.393	1.519	0.368	0.593	0.377	0.571	0.404	0.297		2.122		0.491	1.492	1.766	2.258		1.615	1.01	1.396	0.161	1.72	0.456	1.98	1.284		1.621	1.173	1.258	1.103	0.258
	1.399	1.776	1.474	1.256	1.428		1.004	0.388	0.923	0.465	0.64	0.686	1.645	0.924		0.968	1.644	1.103	0.549	1.306	0.753	0.581	0.39	0.196	0.479	0.541	1.466		1.776		1.245	1.578	1.506	1.521		1.779	1.884	1.047	0.491	0.671	0.525	0.645	1.214		1.37	0.337	1.356	1.328	0.419
	2.325	1.081	2.089	1.241	1.438		2.227	0.388	0.865	0.365	0.491	0.922	1.63	0.806		0.797	2.273	1.084	1.041	1.033	1.548	0.288	0.549	0.388	0.399	0.343	0.502		0.673		1.516	1.962	1.241	1.278		1.528	1.519	0.529	0.51	1.342	1.066	1.536	1.239		2.114	1.361	0.306	1.096	0.319
	1.989	2.12	1.779	1.37	1.482		1.123	0.465	0.434	0.319	0.476	0.529	1.31	1.141		1.601	1.665	2.688	1.516	1.076	1.256	0.695	0.434	0.716	0.388	0.972	0.752		1.42		1.049	1.194	1.879	1.161		1.677	1.084	0.755	0.361	1.235	0.52	1.98	1.161		1.342	0.42	1.204	1.901	0.549
	0.716	0.797	1.211	1.347	1.487		1.485	0.368	1.755	0.368	1.724	0.361	1.098	1.485		0.777	1.037	0.595	1.361	1.047	0.892	1.004	0.26	0.419	0.216	0.174	0.534		1.596		0.678	0.377	1.642	1.258		1.393	1.209	1.174	0.392	0.809	0.854	0.917	1.633		0.903	1.33	1.189	1.112	0.662
	0.966	1.979	1.781	1.38	1.441		1.823	0.41	2.604	0.731	0.329	0.493	2.45	1.02		2.37	1.469	1.774	1.045	0.908	1.774	0.62	0.602	1.05	0.894	0.521	0.355		1.825		2.07	0.456	1.05	1.428		2.185	0.529	1.538	0.277	0.276	0.826	0.612	0.898		0.649	0.781	1.004	1.487	0.365
	0.707	1.224	0.707	1.528	0.801		0.433	0.589	2.697	0.39	0.712	0.306	1.754	0.581		2.032	1.618	1.118	1.025	1.034	1.01	0.707	0.246	0.686	0.419	0.918	0.52		1.869		1.487	2.472	1.295	0.989		1.995	0.806	0.759	0.361	0.502	0.608	2.02	0.844		1.593	1.932	1.111	1.103	0.26
	1.252	0.571	1.559	1.755	0.985		1.047	0.595	0.571	0.388	1.163	0.737	0.493	0.797		1.018	2.161	0.42	1.937	0.822	1.271	0.806	0.394	0.593	0.332	0.645	0.439		0.69		1.058	1.271	1.672	0.839		1.415	1.343	1.128	0.161	0.297	0.491	0.645	0.62		1.417	2.085	0.993	1.4	0.458
	0.779	0.433	0.892	1.859	1.2		0.871	1.252	1.219	0.484	0.664	0.501	1.254	0.571		1.709	0.246	1.216	1.431	0.983	1.204	0.408	0.479	1.494	0.182	0.377	0.433		0.505		0.779	0.779	1.521	1.168		1.63	1.278	1.692	0.41	0.292	0.288	1.065	1.817		1.989	0.297	0.692	1.101	0.937
	1.643	1.385	1.471	1.101	1.517		0.643	0.376	1.444	0.501	0.953	0.361	1.916	1.103		1.864	2.112	1.228	2.024	0.69	2.28	0.332	0.439	1.995	0.376	0.318	0.47		1.189		1.134	0.662	1.082	1.097		1.967	0.832	0.931	0.71		0.716	1.646	1.012		1.265	0.525	0.923	2.007	0.493
	2.032	1.05	1.226	1.448	0.868		1.02	1.155	0.837	0.808	1.241	0.665	1.776	0.896		1.2	2.337	1.628	1.219	0.952	0.549	0.787	0.404	0.652	0.404	0.329	1.076		1.004		1.326	0.376	1.118	1.136		1.209	1.018	1.707	0.329		0.658	0.51	0.653		1.749	1.682	1.847	1.013	0.493
	1.971	1.586	1.123	0.769	1.228		1.355	0.329	0.777	0.404	0.981	0.456	1.193	0.456		1.347	0.451	1.583	1.642		1.371	0.6	0.433	0.868	0.26	1.088	0.677		0.643		2.136	1.749	1.165	1.298		0.871	1.551	1.422	0.129			2.219	1.469		0.376	1.932	0.721	1.054	0.332
	1.307	1.267	2.302	1.578	0.88		0.896	0.913	0.658	0.465	1.506	1.126	1.899	1.131		1.119	0.574	1.646	1.968		1.082	0.347	0.462	0.793	0.292	0.504	0.589		0.665		1.496	0.555	1.129	1.487		0.809	1.582	1.118	0.525			1.729	1.033		1.604	0.318	1.258	1.228	0.534
	0.501	0.742	2.136	1.959	1.918		1.485	0.355	0.712	0.484	0.129	0.488	2.263	0.716		1.904	0.716	0.51	2.04		1.189	0.433	0.662	0.091	0.39	0.368	0.521		1.156		1.556	0.51	1.51	0.898		0.529	0.936	1.144	0.26			1.967	0.987		1.709	0.571	1.415	0.653	0.399
	0.913	2.506	1.415	1.01	1.949		1.477	0.448	1.053	0.581	1.469	0.557	0.865	1.306		0.6	0.434	1.181	2.02		0.636	0.742	0.434	0.593	0.297	0.505	0.258		0.492		1.824	1.485	0.581	0.537		0.501	1.356	0.355	0.761			1.776	0.756		0.808	0.361	0.821	1.33	0.355
	1.539	1.336	2.005	1.784	0.581		0.636	0.458	1.461	0.516	1.369	0.613	2.007	1.053		1.271	1.875	1.336	1.464		1.387	1.61	0.456	0.465	0.376	0.837	0.252		0.686		2.098	0.993	1.101	1.183		0.266	1.396	1.265	0.304			1.635	0.492		0.981	0.517	0.745	1.62	0.361
	0.368	1.5	0.678	2.749	1.848		0.413	0.144	1.699	0.324	1.532	0.356	1.512	1.255		1.431	1.414	1.228	1.405		1.256	0.581	0.645	0.51	0.532	0.388	1.039		1.477		1.184	2.316	1.211	1.029		1.967	1.226	0.465	0.288			1.665	1.001		0.488	0.725	0.288	0.742	0.484
	0.785	1.984	0.708	1.484	1.245		0.652	0.347	3.081	0.64	0.643	0.665	1.462	1.582		0.634	0.529	1.484	1.327		1.771	0.64	0.458	0.26	0.306	0.413	0.233		2.02		1.553	2.031	1.846	1.295		1.373	2.037	1.214	0.297			1.039	0.787		0.689	0.62	1.084	1	0.549
	1.265	1.174	1.501	2.264	1.454		0.479	0.448	1.471	0.485	0.485	0.246	2.386	0.361		1.195	0.616	0.897	1.4		1.183	0.93	0.595	1.181	0.26	0.133	0.502		0.671		1.084	1.76	1.53	1.532		1.83	1.571	0.388	0.42			1.638	0.593		0.725	0.564	1.163	1.674	0.439
	1.415	1.918	1.379	2.057	1.61		0.504	0.41	0.413	0.322	1.037	0.277	1.294	0.525		0.736	0.424	1.76	1.111		0.62	0.377	0.368	2.122	0.97	0.439	0.365		1.843		2.075	1.2	1.87	2.163		0.962	2.264	0.453	0.779			0.781	0.837		2.456	1.123	0.529	1.724	0.39
	1.952	1.001	0.868	1.261	2.291		0.504	0.196	0.904	0.525	0.581	0.51	1.389	0.29		1.508	1.387	1.261	0.725		2.02	0.721	0.368	0.47	0.392	0.525	0.541		0.721		1.174	2.098	1.529	1.968		1.029	1.003	0.304	0.144			1.05	0.737		1.645	3.073	1.198	1.779	0.595
	0.58	1.637	1.2	1.717	1.123		1.615	0.662	2.136	0.235	0.626	0.356	1.2	1.83		2.516	0.877	1.304	1.484		0.69	0.304	0.361	1.714	0.329	0.551	0.68		2.163		0.787	2.013	1.899	1.14		1.336	0.937	1.517	0.246			2.226	0.413		2.348	2.322	0.704	1.92	0.42
	1.385	1.695	0.812	1.592	1.402		0.648	0.996	0.623	0.266	0.564	0.492	1.081	0.639		0.94	1.571	1.563	0.859		1.226	0.643	0.458	0.413	0.465	0.226	0.319		1.053		1.189	2.376	1.451	1.676		0.502		0.563	0.626			1.496	1.471		0.595	2.112	0.484	2.233	0.235
	1.995	1.707	1.724	0.959	1.631		0.686	1.008	1.491	0.259	1.097	0.595	1.987	0.563		1.088	1.101	0.868	1.234		0.892	0.388	1.082	0.852	0.387	0.673	0.488		1.457		1.012	1.396	1.448	0.985		0.62		1.034	0.196			2.72	0.886		1.297	1.866	1.278	1.336	0.665
	1.136	1.519	2.366	0.959	1.448		1.039	0.465	1.385	0.221	0.696	0.207	1.024	1.204		1.44	0.504	1.037	1.061		0.698	0.847	1.706	0.756	0.479	0.678	0.404		1.065		1.614	0.337	1.047	0.616		1.431		1.336	0.399			1.174	0.456		0.75	0.937	1.484	0.458	0.484
	1.118	2.121	0.662	2.326	0.777		1.174	1.143	1.784	0.619	1.411	0.137	1.843	0.653		1.431	2.163	1.974	0.814		0.664	0.662	0.548	0.097	0.324	0.923	0.62		1.693		1.096	0.742	1.905	1.347		2.102		1.236	0.347			1.372	0.748		2.02	1.323	1.211	1.714	0.89
	1.19	1.169	0.981	1.961	1.14		1.082	0.439	0.465	0.233	1.112	0.235	1.323	1.387		2.18	0.822	2.127	0.501		0.623	1.557	0.822	0.465	0.343	0.532	0.318		1.177		0.861	1.798	1.444	1.338		2.239		1.002	0.266			0.787	0.807		1.072	1.101	1.186	1.605	0.521
	1.186	0.549	0.993	1.136	1.675		1.097	0.337	1.602	0.31	0.408	0.491	1.935	1.294		0.458	1.821	0.297	2.05		1.395	0.721	0.439	0.306	0.329	0.571	0.277		1.346		1.494	0.944	1.064	1.307		1.653		1.645	0.52			0.785	0.742		0.867	1.5	1.645	0.541	0.505
	1.072	1.076	1.211	1.428	2.181		1.313	0.868	1.169	0.43	0.608	0.448	1.098	0.868		0.71	0.876	2.217	0.549		1.103	0.453	0.355	1.442	1.103	0.448	0.365		0.712		0.712	1.19	0.448	1.096		0.595		0.88	0.277			1.484	1.306		2.001	1.823	0.492	1.422	0.525
	1.543	1.763	1.355	0.462	0.939		0.908	0.502	0.529	0.308	1.02	0.343	0.626	0.71		0.94	1.189	1.183	0.871		1.336	0.476	0.356	0.806	0.361	0.252	0.993		0.484		2.334	2.271	0.686	1.234		1.948		1.012	0.753			2.181	1.484		2.294	1.665	1.411	0.365	0.714
	1.313	1.126	1.189	0.88	1.91		0.41	0.188	0.606	0.334	0.458	0.26	1.163	0.838		0.71	2.58	2.205	0.297		0.479	1.214	0.365	0.62	0.394	0.355	0.42		0.592		1.682	0.653	1.665	1.66		2.172		1.62	0.448			2.04	1.096		0.479	2.174	0.898	1.437	0.394
	1.131	1.457	1.02	2.149	2.034		0.188	0.26	0.817	0.317	2.081	0.957	1.294	0.886		1.148	2.566	2.281	0.228			0.504	0.492	0.318	0.306	0.584	0.39		1.169		2.317	1.122	2.151	1.241		1.256		0.492	0.318			0.419	0.982		0.292	1.19	1.012	0.909	0.58
	0.292	1.389	2.36	1.369	1.408		1.637	0.276	1.918	0.395	0.448	0.479	1.126	1.208		0.692	1.571	1.744	0.549			0.399	0.368	0.806	0.196	0.517	0.292		1.323		2.303	1.918	1.284	1.03		0.923		0.564	0.404			2.142	0.71		1.259	1.378	0.88	1.573	0.42
	0.376	1.161	1.2	1.665	1.271		1.528	0.517	0.252	0.32	1.332	0.456	0.923	1.328		1.835	1.673	1.648	0.52			0.465	0.488	0.731	0.47	1.278	0.349		0.226		1.183	0.564	1.797	0.797		0.742		1.581	0.258			2.144	1.245		1.123	1.259	0.51	0.537	0.517
	0.563	1.053	1.236	1.026	0.791		0.424	0.857	1.907	0.411	1.829	0.439	2.113	0.871		2.072	1.744	1.621	0.69			0.636	0.252	1.074	0.634	0.822	0.516		0.26		1.486	1.779	1.474	1.226		1.99		0.563	0.449			1.866	1.458		2.463	0.485	0.765	1.666	0.798
	0.798	1.823	1.776	1.737	1.095		0.233	0.826	0.649	0.24	0.686	0.616	1.642	0.847		1.968	1.33	1.448	1.791			0.626	0.332	0.608	0.161	0.577	0.71		1.065		1.561	0.602	1.692	0.62		1.551		0.623	0.266			1.378	2.112		0.433	1.254	1.637	1.673	0.748
	2.296	0.484	1.71	1.46	2.654		1.04	0.26	1.702	0.473	2.004	0.462	1.58	1.144		0.793	1.532	1.252	1.593			0.337	0.26	0.785	0.322	0.626	0.505		1.673		1.252	0.551	1.29	2		2.09		0.94	0.592			1.054	1.413		3.82	0.62	0.571	1.482	0.297
	0.595	0.953	1.42	2.207	2.146		1.437	0.252	1.076	0.347	1.875	0.39	0.246	1.097		0.847	2.08	0.537	0.626			1.002	0.458	0.868	0.517	0.377	0.388		1.764		1.956	1.333	1.597	0.838		1.512		0.324	0.434			1.081	0.645		1.04	0.413	0.775	0.606	0.462
	1.843	1.588	0.774	1.533	1.646		1.364	0.29	2.144	0.26	1.341	0.557	1.587	0.52		1.574	1.615	2.101	1.53			0.419	0.433	1.254	0.424	0.897	0.368		0.548		0.94	1.635	1.229	1.03		1.258		0.388	0.322			0.501	0.721		2.358	1.62	1.101	1.651	0.361
	1.989	1.809	1.029	0.91	2.219		1.557	0.551	1.219	0.427	1.333	0.557	0.318	0.645		1.428	2.167	1.807	1.904			0.555	0.502	0.837	0.616	0.434	0.871		1.372		0.837	1.918	2.003	2.281		1.548		0.361	0.26			0.854	1.391		1.012	1.725	2.199	1.131	0.337
	0.793	0.922	1.372	0.695	1.284		0.361	0.368	1.361	0.28	0.549	0.387	1.571	1.053		0.748	0.525	2.163	0.636			0.433	0.525	0.664	0.571	0.448	0.857		1.284		2.174	1.234	1.252	0.318		1.391		0.361	0.274			0.439	1.231		1.129	1.725	1.371	1.31	0.297
	1.025	1.575	1.862	1.452	1.131		0.801	0.673	2.185	0.192	2.152	0.388	0.68	0.873		0.419	0.649	1.968	1.415			0.449	0.43	0.332	0.484	0.343	0.981		0.434		1.129	0.52	1.091	1.29		0.742		1.119	0.504			2.753	0.791		2.109	1.197	0.759	1.144	0.26
	1.084	0.246	1.136	1.793	1.413		0.571	0.484	0.909	0.272	1.304	0.612	1.976	0.548		2.052	0.979	1.277	1.762			0.616	0.574	0.809	0.434	0.297	0.277		0.981		1.261	2.326	2.032	1.797		0.917		0.51	0.517			1.328	1.2		2.445	1.635	2.767	0.826	0.424
	1.471	0.909	0.886	1.448	1.933			0.42	1.76	0.483	0.43	0.614	1.516	0.42		2.601	1.373	0.581	1.136			0.529	0.555	0.728	0.292	0.721	0.448		1.413		1.4	0.953	2.859	1.53		1.825		1.316	0.462			1.136	1.073		1.942	1.88	0.841	0.721	0.574
	0.903	1.924	1.3	1.859	0.806			0.413	0.801	0.313	0.365	0.517	1.804	0.968		2.461	2.362	1.168	0.89			0.683	0.602	0.476	0.182	0.501	0.571		1.685		1.779	1.521	1.356	1.645		2.213		0.458	0.388			0.838	0.791		1.699	1.241			0.439
	1.356	1.506	0.476	0.274	1.811			0.392	0.276	0.299	2.193	0.616	2.007	0.368		2.098	1.582	1.784	0.304			0.329	0.42		0.769	0.581	0.349		0.931		0.798	0.837	1.471	1.336		1.557		1.163	0.347			2.27	1.272		1.893	1.544			0.368
	0.839	0.91	1.091	0.909	2.037				0.505	0.375	2.037	0.52	1.733	1.165		1.864	0.488	2.601	2.221			0.593	0.329		0.226	0.549	0.377		0.987		2.851	2.144	1.356	0.959		1.836		1.516	0.361			0.809	0.962		0.949	1.385			0.387
	1.574	1.42	1.749	0.753	1.318				1.422	0.4	0.996	0.343	1.406	0.91		0.525	2.031	1.437	1.411			0.491	0.516		0.288	0.349	1.292		0.692		2.373	1.292	0.71	1.995		1.784		1.245	0.453			1.322	1.108		0.529	0.696			0.377
	1.969	0.962	1.51	0.636	1.415				1.605	0.336	1.797	0.451	1.169	1.236		0.547	2.05	1.369	1.066			0.636	0.29		0.549	0.645	0.608		0.504		1.399	2.131	2.483	1.44		1.835		1.823	0.419			0.832	1.239		1.753	0.841			0.394
	2.657	1.994	2.153	1.198	1.875				0.563	0.26	1.861	0.306	0.917	1.132		2.413	1.516	0.745	0.975			0.258	0.47		0.42	0.525	0.829		0.868		0.662	1.049	0.399	1.839		2.02		0.616	0.551			0.837	0.602		0.69	0.504			0.52
	1.785	0.806	1.549	0.798	2.009				0.404	0.245	1.244	0.43	1.129	1.449		1.66	2.131	1.269	0.592			0.43	0.68		0.29	0.606	0.419		0.453		0.777	0.652	0.456	0.665		1.187		0.228	0.801			0.814	0.646		1.211	0.645			0.58
	0.993	1.265	1.504	2.062	1.644				0.276	0.35	0.937	0.484	1.746	1.065		0.645	2.163	1.126	1.627			0.563	0.822		0.392	0.517	0.824		0.306		1.288	0.731	1.14	0.525		1.848		0.292	0.479			0.608	1.42		1.239	2.172			0.505
	1.113	0.841	1.762	1.385	1.084				1.666	0.358	0.742	0.462	0.821	1.053		1.977	0.812	1.428	1.593			0.548	0.277		0.493	1.851	1.091		1.702		0.665	0.745	1.484	1.871		0.485		0.319	0.329				1.866		1.721	2.036			0.439
	1.576	1.437	1.477	2.122	1.348				2.076	0.35	0.595	0.349	1.477	1.098		0.62	1.091	0.841	0.808			0.413	0.394		0.492	0.555	0.349		1.791		0.365	0.6	1.872	1.997		0.6		0.636	0.376				0.433		1.344	0.349			0.564
	0.88	0.595	0.571	0.551	0.368				0.777	0.334	0.388	0.292	0.534	0.886		2.013	1.499	0.721	1.256				0.322		0.388	0.233	0.361		0.781		0.806	2.043	1.582	0.877		1.528		1.864	0.322				1.04		1.428	0.563			0.671
	0.388	0.968	0.904	0.557	0.816				2.058	0.299	0.824	0.51	1.843	0.952		0.548	1.14	1.764	1.504				0.456		0.413	0.361	0.347		0.931		2.231	1.69	1.572	0.394		1.903		1.026	0.549				1.612		0.555	1.945			0.809
	2.064	0.777	2.001	0.102	1.189				1.197	0.4	0.349	0.458		0.71		0.838	1.65	1.388	0.824				0.356		0.408	0.347	0.541		1.457		2.048	1.056	1.267	0.434		1.336		0.501	0.574				1.118		0.881	0.982			0.458
	1.748	0.993	2.048	1.29	1.3				1.4	0.487		0.404		0.908		2.058	1.128		0.643				0.356		0.29	0.376	0.42		1.485		1.877	1.419	0.645	0.246		1.638		1.484	0.304				0.968		1.424	1.169			0.419
	1.529	1.187		0.563	0.584				1.952	0.28		0.306		1.387		1.033	2.034		0.886						0.781	1.806			1.041		1.037	1.463	1.101	1.566		0.504		1.432	0.322				1.264		1.781	0.71			0.929
	1.992	1.165		0.908	2.064				1.897			0.616		1.518		1.346	0.814		1.597						0.623	0.388			1.731		2.723	2.007	0.955	1.209		1.31		1.903	0.144				1.269		1.613	1.76			0.525
	1.575	1.925		0.529	1.469				0.564			0.581		0.908			1.491		1.298						0.493	0.51			1.169		1.52	1.963	1.642	1.332				0.332	0.387				1.082		1.143	2.02			0.752
	1.766	1.98		1.04	0.68				0.983			0.266		1.097			1.174		0.904						0.485	0.643			0.816		1.997	0.955	1.361	1.729				0.491	0.228				1.419		1.004	0.745			0.635
	1.852	1.217		0.581	1.068				1.326			0.356		1.256			0.549		2.388						0.62	1.582			1.025		0.94	1.805	0.708	1.761				1.371	0.174				1.474		0.626	1.592			0.755
	2.778	1.861		0.721					1.963			0.537					1.136		1.848						0.484	0.905			1.197		0.592	2.113	0.662	1.487				0.434	0.277				0.898		0.698	2.031			0.525
	2.397	0.635		1.073					1.358			0.288					1.133		1.432						0.563	0.626			1.288		2.075	1.846	0.716	0.399				0.549	0.297				0.653		1.624	0.742			0.847
	1.683	2.212		0.877					0.665			0.493					0.343		1.259						0.343	0.47			0.966		0.571	1.272	0.93	2.075				1.399	0.26				1.072		0.982	1.422			0.534
	1.551	1.163		1.329					1.045										0.775						0.292	0.413			1.66		0.549	0.645	0.529	1.949				0.297	0.453				1.294		0.602	0.502			0.277
	1.298	1.691		0.662					2.271										1.183						0.274	0.274			1.197		0.451	0.877	1.025	2.064				1.854	0.288				1.803		0.806	0.658			0.365
	1.683	1.516		0.458					0.368										1.666						0.306				1.813		1.183	1.645	0.665	1.026				0.652	0.337				1.134		0.859	0.936			0.419
	2.068	1.848		1.012					1.228										2.138										0.75		2.089	1.072	0.574	1.897				0.476	0.347				0.824		0.646				0.41
	1.621	0.968		0.78					1.578										1.51										0.394		1.449	1.872	1.211	2.478				1.061	0.595				0.859		0.966				0.912
	1.602	0.635		1.128					1.69										1.418										1.779		0.851	1.163	1.485	1.929				0.812	0.356				1.097						0.458
	1.843	0.413		0.785					1.544										1.197										1.056		0.837	2.28	0.479	2.077				0.62	0.297				0.581						0.623
	1.798			0.266					0.465										0.704										1.183		1.97	2.415	1.033	0.923				0.88	0.714				1.316						0.419
	2.373			0.816					0.822										0.737										0.892			1.174	1.129	1.525				0.51	0.439				0.731						0.235
	0.549			0.725															2.1										0.781			1.691	1.084	2.453				1.354	0.851				1.347						0.51
	1.928			1.632															1.4										0.952			0.606	0.93	1.489				1.125	0.47				1.3						0.388
	2.869			0.549															0.646										0.735			1.452	1.756	1.119				1.186	0.898				1.825						0.537
	0.959			0.137															1.697										1.209			1.525	0.304	1.5				0.972	0.62				1.422
	2.19			0.479															1.553										1.864			1.932	0.838	1.511				0.322	0.595				1.342
	2.253			0.408															1.302										0.258			2.625	0.775	0.841				0.548	1.088				1.226
	1.4			1.395															2.589										1.078			1.847	0.935	1.627				1.065	0.347				0.6
	2.292			0.94															1.444										1.058			2.195	1.133	1.848				0.549	0.413				0.636
	0.838			0.755															2.699										1.056			2.266	0.847	1.873				1.267	0.593				0.871
	1.367			1.072															1.04										1.538			2.202	1.51	1.209				1.024	0.194				0.816
	1.755			0.451															1.682										2.096			2.303	1.01	0.924				1.28	0.439				1.616
	1.908			0.408															1.742										1.745			2.093	1.039	0.9				0.434	0.537				1.082
	1.88			1.776															1.098										0.563			1.703	1.194	1.425				1.184	0.329				1.666
	2.075			0.297															0.708										1.289			1.613	1.012	1.494				0.377	0.484				1.575
	1.072			0.356															2.032										0.547			1.932	1.145	0.683				0.388	0.485				0.456
	0.686			1.231															1.422										1.004			1.592	1.269	0.458				0.671	0.349				1.588
	1.839			1.033															0.58										1.228			0.626	1.163	1.328				1.764	0.324				1.877
	2.073			0.288															0.91										0.755			0.9	1.097	1.256				0.839	0.532				0.913
	1.169																		0.521										0.439			0.735	0.985	0.581				0.343	0.43				0.844
																			1.553										1.405			0.584	1.001	1.553				0.439	0.365				0.781
																			1.474										0.645			0.571	1.118	1.65				0.292	0.504				1.144
																			1.775										0.865			2.144	1.141	1.422				1.677	0.388				0.388
																			1.368										1.227			1.76	1.323	1.442				1.033	0.318				1.081
																			1.189										1.026			2.167	1.008	1.744				0.453	0.337				1.653
																			1.396										0.41			1.731	1.267	0.975				0.957	0.394				1.411
																			0.892										1.55			1.42	1.053	0.922				0.42	0.419				1.563
																			0.662										1.781			0.806	1.072	2.741				0.665	0.368				0.634
																			1.041										1.082			1.012	1.697	1.119				0.549	0.563				1.141
																			1.556										1.018			1.045	0.462	1.174				0.434	0.292				1.276
																			1.163										0.716			1.666	1.313	1.732				1.306	0.742				0.801
																			1.025										0.807			1.907	0.502	1.096				0.332	0.453				1.918
																			0.504										1.31			1.118	0.779	0.707				0.102	0.449				0.716
																			1.469										1.234			0.721	0.612	1.739				0.324	0.555				0.745
																			1.551										1.224			2.512	1.064	1.428				1.633	0.424				1.193
																			1.269										0.962			0.97	0.851	1.103				1.646	0.78				1.173
																			1.231										0.73			2.45	0.935	1.132				0.952	0.555				1.665
																			0.897										1.31			1.204	1.496	0.918				1.385	0.636				1.158
																			1.503										0.91			0.549	1.053	0.606				1.806	0.593				1.393
																			1.656										0.983			0.388		1.174				0.246	0.868				0.777
																			0.892										1.753			0.581		0.909				0.439	0.646				1.053
																			0.557										1.081			0.465		0.564				0.476	0.39				1.234
																			0.571										0.801			1.258		0.593				0.404	0.479				0.838
																			1.528										1.001			1.268		0.686				1.026	0.388				0.827
																			0.51										1.298					0.58				1.847	0.324				0.968
																			1.645										0.462					0.665				0.196	0.462				0.634
																			1.425										1.14					1.209				0.721	1.114				0.664
																			1.477										0.807					0.94				1.566	0.39				1.183
																			1.053										1.226					0.581				1.29	0.484				0.809
																			0.721										1.228					0.563				0.26	0.42				0.949
																			1.232										0.841					0.555				0.439	0.392				0.832
																			1.072										0.806					0.753				1.419	0.714				1.224
																			2.206										1.355					0.645				0.574	0.292				0.602
																			1.604										0.742					1.008				0.479	0.356				1.3
																			2.05										0.881					0.297				0.529	0.377				0.949
																			1.347										1.417					0.394				0.51	0.292				1.449
																			0.649										1.536					0.981				0.277	0.517				0.388
																			0.922										1.101					0.765				0.897	0.41				0.329
																			1.307										1.446					0.645				0.246	0.548				0.26
																			1.462										1.347					1.096				0.529	0.356				0.665
																			1.546										1.714					0.868				0.408	0.337				1.126
																			0.881										1.966					1.101				0.456	0.39				0.958
																			1.437										0.557					1.226				0.504	0.465				1.151
																			0.735										0.838					1.072				0.304	0.504				1.073
																			1.877										0.75					0.484				1.269	0.324				0.593
																			1.918										1.356									0.996	0.505				0.653
																			1.788										1.785									0.47	0.479				0.88
																			0.769										0.871									0.41	0.413				1.053
																			0.854										0.534									1.563	0.525				0.966
																			2.064										0.492									0.868	0.47				0.686
																			1.316										0.534									1.4					0.277
																			0.708										0.678									1.119					0.626
																			1.322										0.686									1.181					1.512
																			1.675										0.581									1.66					1.4
																			1.601										0.653									1.241					1.254
																			1.095										1.528									0.137					0.755
																			1.955										1.01														1.341
																			1.487										1.261														0.664
																			2.048										1.256														1.355
																			1.183										0.808														0.968
																			1.538										0.662														0.689
																			1.229										0.643														0.349
																													0.571														0.806
																																											1.041
																																											0.204
																																											0.555
																																											0.42
																																											1.068
																																											1.231
																																											0.695
																																											0.817
																																											0.532
																																											0.551
																																											0.635
																																											0.837
																																											0.779
																																											0.704
																																											0.987
																																											0.548
																																											0.504
																																											0.606
																																											1.457
																																											0.944
																																											0.388
																																											0.288
																																											1.103
																																											0.297
																																											0.504
																																											0.716
																																											0.548
																																											0.94
																																											0.877
																																											0.68
																																											0.626
																																											0.767
																																											0.343
																																											0.765
[truncated: 7 more columns]
