# Supplementary material for: A stable microtubule bundle formed through an orchestrated multistep process controls quiescence exit
Source: eLife. 2024 Mar 25;12:RP89958. doi: 10.7554/eLife.89958 (PMC10963028; doi:10.7554/eLife.89958)
Supplement: Figure 2—source data 2. [file elife-89958-fig2-data2.xlsx]

## Sheet: Feuil1
n=	72										Isy639 phase I
Length	Q-nMTbundle intensity		3	4	5	6	7	8	9	10	11	12	13	14	15	16	17	18	19	20	21	22	23	24	25	26	27	28	29	30	31	32	33	34	35	36	37	38	39	40	41	42	43	44	45	46	47	48	49
0		324		432	212	186	286	185	67				220	275		210	140						60	158	106						105	180		244			239					162	232	346	263			84
0.129		372		461	409	472	434	427	255	427	405	608	355	392	267	479	292			367	303	588	141	410	339			411		353	245	390		387	401		303			234		226	426	508	142		268	255
0.258	904	644	518	684	729	771	633	583	622	638	689	807	614	763	604	750	932	697	622	692	535	654	442	638	658	694	773	666	597	523	490	580	876	675	716	764	513	784	551	487		678	621	590	265	506	525	423	572
0.387	1168	1051	904	840	758	742	822	901	1306	1166	1015	947	933	990	854	819	1338	1238	1127	1126	877	1000	900	740	931	1106	1254	847	846	820	527	551	1139	777	1236	1147	860	1121	953	871	778	1082	782	1040	351	809	792	517	972
0.516	1358	1187	1263	810	947	798	775	1177	1452	1401	1315	1168	1100	1057	1042	870	1171	1521	1520	1729	1329	1506	1440	871	1094	1445	1989	800	1140	1235	508	618	1480	754	1678	1667	1205	1447	1555	1128	1579	1147	925	1504	437	1183	947	666	1505
0.645	1877	1246	1595	836	953	757	631	1121	1541	1458	1395	1325	1044	943	1165	954	1115	1463	1600	2311	1425	1795	1507	852	1013	2177	2296	771	1086	1356	604	535	2177	771	1937	1976	1507	1523	1581	1108	1865	1087	1000	1690	402	1461	945	741	1965
0.774	1977	1354	1483	764	967	655	560	1219	1239	1499	1251	1321	1032	920	1136	759	1098	1485	1339	2316	1388	1843	1289	884	955	2621	2311	598	1191	1461	611	529	2707	830	1853	1935	1429	1736	1539	1274	1575	1338	1085	1620	381	1364	938	835	2033
0.903	2293	1271	1480	548	892	529	527	1225	1095	1490	1096	1155	1165	822	1024	716	1117	1317	1275	2273	1399	1881	1114	762	954	2545	2346	620	1125	1437	668	482	2446	806	1620	1767	1369	1774	1638	1195	1491	1300	1066	1500	310	1106	954	692	2043
1.032	2130	1125	1501	501	752	564	514	1191	855	1501	1057	1022	1113	687	906	585	913	1056	1004	1906	1396	1797	1129	719	924	2414	2141	610	1304	1310	444	411	2313	848	1524	1882	1273	1892	1425	1141	1431	1133	938	1437	290	1199	988	652	1851
1.161	1826	1024	1235	261	422	422	392	1223	680	1253	964	858	1048	619	651	591	834	875	870	1568	1164	1532	920	739	828	2357	1968	603	1209	1010	490	375	1929	708	1516	1631	1159	1850	1330	1207	1636	1151	887	1416	221	1152	1055	618	1557
1.29	1984	794	1168	139	289	233	335	1213	467	1049	708	521	999	432	505	395	759	791	808	1118	973	1579	753	797	715	2173	1625	547	1090	1011	352	305	1737	602	1254	1213	830	1516	1391	1093	1533	1222	790	1260	196	1133	945	538	1274
1.419	1555	699	916	21	73	124	374	1120	247	827	624	303	963	352	326	379	619	654	521	501	798	1558	893	646	540	1801	949	495	928	696	181	247	1631	581	1192	1217	587	1521	1248	1250	1357	1237	575	1222	243	986	984	455	1128
1.548	1526	651	592		115			1160	379	601	491		792	317	57	294	464	432	451	323	505	1566	789	534	415	1455	562	422	777	669	93	96	1501	502	1121	886	519	1269	1089	1048	1206	1395	464	1111	165	676	903	254	1158
1.677	1649	634	224		65			1054	228	287	408		668	272		155	234	338	290		384	1400	695	465	334	1246		310	647	640	131	133	1241	412	976	711	412	1232	911	932	1117	1120	198	1001		548	903	283	892
1.806	1628	427						882	171		279		528	131		120	297	286	106			1264	557	481	218	754		290	417	306			1021	332	880	559	274	990	473	1020	918	1081	100	867		422	810	218	554
1.935	1670	288						678	186		424			-38		109	195		9			1072	246	408	123	693		145	280	149			703	185	871	341	189	854	310	915	649	1034		620		145	842		413
2.064	1227	199						464	81		409					125						661	57	186	147	470		31					446		697	171	161	596		681	510	861		508		-8	643		195
2.193	782							349			280											436		100		331							193		643			367		300	248	542		463			344
2.322	502							204			194											292											52		573			242		120	89	311					275
2.451	414										180																						50		600			78									225
2.58	170										141																						58		603												66
2.709																																			517
2.838																																			384
																																			335
																																			383
																																			199
n=	69										Isy702 phase I
Length	Q-nMTbundle intensity		3	4	5	6	7	8	9	10	11	12	13	14	15	16	17	18	19	20	21	22	23	24	25	26	27	28	29	30	31	32	33	34	35	36	37	38	39	40	41	42	43	44	45	46	47	48	49
0	125	119	233		191		244			190	100	271	181	161		324			316	176		186	147		430	177	150			201					279	216		277	183		208	161	175	346	223		216	110	38
0.129	230	407	453	574	269	335	389	311	280	316	263	498	353	392	391	483	420	388	350	262	242	235	252	225	546	498	290	220	262	412	325		383	428	519	267		483	391	141	276	337	279	508	356	211	217	199	308
0.258	579	660	711	695	395	695	707	542	547	683	454	570	490	684	843	782	795	809	705	451	593	469	529	489	703	721	605	438	496	552	561	640	639	579	759	658	585	708	440	401	447	534	661	590	584	788	455	519	629
0.387	846	911	984	999	449	1112	862	807	655	864	752	635	539	936	1004	937	1191	1130	772	537	777	640	722	1159	858	965	738	655	757	786	680	1174	942	826	957	854	1008	1012	504	1002	571	728	1260	1040	886	1592	669	954	1019
0.516	1208	1080	1132	1378	522	1292	983	989	1221	831	887	838	615	1025	1189	964	1274	1309	852	531	882	522	751	1900	910	1013	715	756	721	893	800	1491	1335	1115	802	952	1290	1096	624	1223	547	884	1297	1504	795	2028	726	1022	1226
0.645	1405	1237	1186	1405	572	1180	951	854	1433	724	723	824	772	1000	1188	802	1367	1466	945	558	927	482	801	2465	821	886	548	596	820	860	904	1404	1592	1266	850	903	1632	1169	523	1431	589	835	1631	1690	656	1701	651	1140	1300
0.774	1524	1180	1070	1484	578	893	752	848	1398	776	540	934	666	1024	1066	909	1308	1626	962	681	898	614	734	2037	751	864	577	534	732	894	969	1664	1551	1352	747	734	1398	1037	590	1342	662	728	1521	1620	818	1550	715	1366	1203
0.903	1474	1164	823	1470	649	868	820	851	1409	769	447	933	674	974	799	896	1053	1496	944	605	913	616	637	1406	760	797	555	596	682	848	716	1469	1515	1234	558	718	1467	1002	748	1091	468	722	1669	1500	776	1215	691	1270	1382
1.032	1369	1033	749	1336	638	581	675	747	1063	703	347	891	619	787	501	802	955	1509	648	527	851	502	499	864	831	821	501	604	706	827	845	1263	1418	1096	630	667	1357	639	670	922	429	674	1371	1437	820	876	625	1028	1319
1.161	1368	908	640	1219	533	657	583	701	865	552	237	946	483	692	224	731	752	1367	545	573	665	477	358	515	784	713	598	565	664	728	661	833	1497	1050	392	672	1260	377	630	647	473	606	1419	1416	680	815	513	1019	1438
1.29	1100	808	509	940	458	533	322	632	554	504	304	801	413	671	119	611	544	1216	433	455	609	457	144	289	799	418	490	649	504	426	682	538	1364	959	366	469	1109	193	550	501	381	428	1216	1260	393	494	489	623	1407
1.419	885	654	378	714	360	246	335	509	277	372	222	702	254	449		488	424	647		414	563	423		188	819	225	468	557	406	314	544	365	1129	808	259	343	814	237	550	314	481	314	726	1222	254	339	333	280	1175
1.548	641	434	313	510	312		243	423	120	311	222	575		354		327	322	522		222	344	170		122	784		322	537	269	139	427	187	1084	678	178	224	718	24	449	184	439	167	499	1111	258	253	359	180	1026
1.677	504	302	274	492	265			263	177	194	187	373		230		205	240	224		147	358				599		434	440	281	173	227	241	804	359	230	200	574		221	117	203	107	253	1001	105	167	277	85	989
1.806	320	227	223		189			187			155	321		242		152		173			217				450		200	362	118		173		647			294	448		184					867			167		841
1.935	165	178	133		131			163			297	315		228				115			159				438		306	234	34		121		594			136	428		145					620			136		620
2.064	146	126	104		129			106			10	166		223							71				381		184	315			235		449				372							508					501
2.193			69					20			58	180		179											347		89	119			191		239				450							463					245
2.322			59									80													244		88				142						230
2.451			15									96													165						54						225
2.58																															101						403
2.709																															50						57
2.838
2.967
3.096
3.225
n=	64										Isy639 phase II 36h
Length	Q-nMTbundle intensity		3	4	5	6	7	8	9	10	11	12	13	14	15	16	17	18	19	20	21	22	23	24	25	26	27	28	29	30	31	32	33	34	35	36	37	38	39	40	41	42	43	44	45	46	47	48	49
0																																			451	388			411			341				184		278
0.129			745		812		874					336	443		397			329								1038	497		547			721	507	596	787	605	396	378	671	898	646	797	469	532		406		484	219
0.258			970		846		989				833	869	773		833	671	795	687		875	570		1182	639		1087	757	506	1019	892	865	1000	790	1036	1043	954	703	842	1208	1106	952	885	957	583	618	600	568	938	787
0.387		1181	1554	1619	1129	1471	1176	1102	1266	1080	1409	1555	1334	1092	1190	1084	1007	1256		1534	1244	1127	1293	966	1115	1272	1751	1043	1268	1276	1263	1376	1427	1848	1674	1475	1289	1819	1456	1385	1219	1342	1904	1260	1468	822	1284	1628	1312
0.516	1865	2140	2466	1534	1672	1910	1881	1408	2369	2144	2495	2599	1683	1911	1829	1693	1249	1381	1879	2067	1759	2214	1722	1321	2077	1944	2943	1990	1570	1817	1710	1623	2115	2239	2399	1562	1778	1992	1547	1464	1439	1640	2497	2164	1914	818	2330	1576	1505
0.645	2982	3510	2667	1989	1918	2582	2069	1716	3602	2995	3091	2508	1800	2952	2582	1787	1222	1772	2500	2748	2167	3139	2171	1529	3478	2139	3395	2133	1753	2238	1728	2077	2550	2176	2256	1640	2069	1970	1437	1622	1620	1527	2900	2585	1676	833	2820	1966	1585
0.774	3906	4398	2711	2363	1957	3487	2161	1902	4079	3063	3256	2340	1740	4019	2951	1767	1309	2162	3925	2949	1978	3822	2143	1459	4538	2099	3683	2288	1589	2559	1885	2462	2338	2118	2080	1435	2043	2334	1409	1409	1817	1343	3271	2369	1825	979	2920	2106	1339
0.903	4317	4264	2442	2432	2168	4191	2422	2167	4420	2793	3314	3003	2050	4044	2777	1512	1335	1988	5592	3063	1815	4438	2184	1499	4934	1977	4054	2331	1534	2331	1934	2601	2076	2019	2015	1576	2062	2113	1374	1370	1663	1208	3031	2239	2079	914	2725	1728	1348
1.032	4112	4048	2029	2527	2249	4320	2615	2833	4575	2017	3138	2771	2201	3634	2493	1641	1316	1882	6489	3227	1935	4330	2324	1612	4734	1818	3515	2359	1590	2172	1805	2590	1986	1940	1814	1382	2098	1980	1125	1385	1474	1202	2767	2062	1859	877	2365	1655	1405
1.161	4092	3761	2038	2421	2262	4267	2425	2906	3894	1276	3170	2540	2341	3698	2324	1465	1104	1842	6542	3050	1942	3896	2248	1453	4687	1741	3088	2446	1446	2059	1856	2554	1686	1808	1607	1331	1869	1970	1064	1306	1319	1062	2720	1933	1780	857	2033	1958	1081
1.29	3841	3393	2111	2248	2265	4513	2259	2776	3229	998	2917	2773	2300	3714	2271	1365	1211	1948	6261	3043	1849	2983	2212	1440	4073	1765	3347	2302	1318	1836	1662	2389	1482	1657	1566	1224	1624	1712	932	1172	1205	921	2728	1781	2040	856	1912	1680	1002
1.419	3766	3049	2027	2210	2225	4075	2185	2597	2450	835	2748	2590	2367	3302	2392	1078	1117	1805	5992	2939	1581	2282	2104	1277	3710	1709	2398	2374	1123	1543	1507	2272	1637	1707	1498	1210	1988	1459	916	1144	1177	862	2765	1540	1904	864	1759	1290	925
1.548	3510	2890	1998	2272	1940	3711	1855	2536	2024	756	2505	2872	2338	3051	2343	1147	984	1777	5552	2716	1484	1416	1767	1230	3249	1551	1579	2367	944	1479	1416	2283	1532	1594	1151	1140	1981	1310	781	1094	1040	861	2701	1316	1980	718	1410	946	921
1.677	3286	1972	1745	2253	1690	3141	1527	2433	1613	307	2151	2687	2238	3077	1944	1000	975	1749	5255	2429	1376	817	1588	1104	2811	1327	983	2437	841	1297	1346	2021	1317	1396	835	1253	1739	1399	580	1014	1037	617	2265	995	2000	751	778	632	852
1.806	2848	1324	1632	2124	1371	2887	1305	2351	858	191	1641	2436	2190	2842	1954	918	931	1701	4482	1964	1136	358	1525	822	2322	907	527	2362	435	926	940	1713	1309	1150	652	1172	1553	1276	462	708	997	514	2091	662	1767	564	318	436	735
1.935	2316	836	1473	1911	1018	2797	923	2016	589		1309	1614	2088	2613	1681	565	832	1969	3450	1777	998		1351	704	1989	554	479	2241		765	697	1461	1185	808	455	1062	1394	909	318	504	910	482	1487	443	1731	543	247		752
2.064	1917		1084	1897	687	2685	597	1618	164		1049	1175	1838	2341	1316	238	719	1739	2579	1435	798		1043	492	1549	329		2202		555	458	1112	871	553	176	742	1006	641	207	378	844	251	1277		1494	627			606
2.193	1373		733	1874		2269	522	1396			717	898	1866	1764	1176		561	1555	1956	1083	767		599	312	1248	263		1807		394	283	709	656	436	144	576	593	462			836	135	1043		1179	658			155
2.322	894		316	1763		1690	390	1220			540	580	1324	1477	942		307	1324	1033	671	640		355	197	1161	169		1568		199	15	392	440	228		414	249	338			897	114	883		878	559			29
2.451	841		127	1657			272	1235			379	244	973	1083	444		86	1116		400	470				1006	115		1359			79	195	223	142		233		125			992		575		735	746
2.58	573		149	1443			274	1278			305	160	744	671			12	957			241				1044			910						54							905		317		121	691
2.709	268		164	1162				1008					439	611				679			286				953			588						-69							719					626
2.838				877				902					333	550				340							858			265													574					486
				634				777						433				112							526			140													513					144
								689						110				37							256																332
																																									275
																																									107
n=	69										Isy702 phase II 36h
Length	Q-nMTbundle intensity		3	4	5	6	7	8	9	10	11	12	13	14	15	16	17	18	19	20	21	22	23	24	25	26	27	28	29	30	31	32	33	34	35	36	37	38	39	40	41	42	43	44	45	46	47	48	49
0					21	23																									22
0.129	70	169			67	47																									76																28
0.258	99	160	220		70	81		153		22	76				167					100		195		370	182	92	48	-45			127														38		80	135
0.387	36	269	301	189	86	236		336	344	155	157				286			354		202	243	416	308	483	419	273	166	102	78	141	231										118			248	113	118	305	292	146
0.516	575	438	432	337	269	368	450	367	559	321	399	622	264	418	603	307	396	632	419	320	406	497	417	590	615	488	394	466	240	436	402	190	437	450		353	207	212	288	259	372	486	414	366	297	355	279	410	456
0.645	1068	650	708	641	536	493	765	556	921	686	941	893	644	694	930	599	909	988	684	850	550	798	785	986	758	729	554	901	659	832	732	617	847	722	441	849	507	608	764	921	779	902	626	716	452	570	488	597	1037
0.774	1349	654	1100	733	717	479	1069	517	1257	725	1336	1541	802	1119	1083	1068	1233	1464	1094	1533	636	968	1230	1003	962	1151	531	1194	1136	1116	1007	1306	789	785	1111	1035	785	922	1209	1468	997	1021	1170	915	378	1009	638	675	1308
0.903	1607	655	1418	943	731	425	1238	658	1483	1039	1601	1786	966	1529	1401	1378	1497	1866	1182	2189	718	1034	1343	1232	1255	1946	516	1482	1618	1002	1210	2149	808	757	1208	1200	1208	830	1329	1723	1174	901	1294	1060	185	1621	683	902	1313
1.032	1620	806	1495	1043	692	474	1353	863	1574	1290	1621	1935	1188	1489	1483	1852	1524	1906	1326	2321	791	955	1371	1516	1442	2265	456	1185	1913	1005	1248	2299	459	691	1215	937	1126	782	1227	1726	1108	553	1351	1016	110	1933	679	726	1230
1.161	1473	659	1540	1103	713	404	1316	931	1449	1114	1636	1634	1231	1137	1381	2002	1466	1679	1193	2326	809	864	1302	1607	1271	2243	581	1239	1689	915	1209	2257	691	701	1414	821	1144	995	969	1680	1296	571	1123	1154	20	2024	527	658	1081
1.29	1441	584	1435	1057	784	470	1134	1015	1368	945	1333	1400	1507	977	1462	2028	1426	1542	1386	2142	862	732	1272	1567	1146	2222	458	1138	1680	815	1144	2034	455	578	1324	569	1168	910	820	1478	1371	506	914	1042	1	2125	524	682	1099
1.419	1275	573	1498	1016	757	347	1022	851	1278	944	1448	1320	1447	711	1268	1835	1244	1207	1392	1855	775	619	1067	1664	1073	2181	506	996	1467	742	1049	1733	522	444	1195	430	1135	802	788	1460	1291	537	948	818	-24	1974	519	473	926
1.548	1090	454	1336	834	805	334	969	898	1064	918	1579	1212	1266	589	1395	1473	1149	1092	1471	1662	617	586	765	1621	1027	2218	332	917	1126	739	975	1627	730	576	1125	279	1173	842	888	1223	1171	268	707	935	-21	2053	547	560	581
1.677	703	516	1264	671	729	336	876	1015	1036	882	1449	1092	1139	564	1387	1207	971	823	1323	1471	493	507	691	1434	930	2191	346	690	1139	570	862	1240	440	485	812	404	1001	718	688	881	1101	238	574	777	104	1837	388	568	693
1.806	656	503	1145	684	800	308	779	853	831	942	1292	880	941	345	1263	1028	768	887	1311	1461	461	476	564	1096	810	2036	303	695	933	480	776	1322	578	495	624	159	943	643	518	512	834	263	469	533		1671	176	553	649
1.935	250	487	790	620	607	263	619	686	617	903	1205	667	880	417	1077	756	598	926	1023	1481	448	393	313	948	892	1803	208	428	918	565	656	868	256	384	546	208	626	709	347	221	777	286	194	268		1830		357	506
2.064	69	431	715	468	539	224	537	794	526	873	1017	446	794	328	1080	628	522	605	1059	1423	337	307	176	853	818	1685	171	264	523	412	552	939	228	242	231	139	502	563			619	163		43		969		213	262
2.193	13	335	502	383	489	170	479	570	348	704	828	465	755		898	467	388	671	987	1207	230	254	147	903	680	1348	219	222	362	455	505	791		186				545			635			117		607		116	199
2.322	42	322	439	395	397	105	315	493	202	581	764	385	564		905	424	375	820	788	1244	152	413	53	809	537	1243	99		241	335	454	506		192				372			521					293			117
2.451		319		385	212	108	263	316	179	380	489	345	377		645	392	337	646	701	1133	127	296		394	397	838	140			220	364							148			255					36			106
2.58		250		350	129	14	200	273		269	294	323	465		492	138	178	685	566	1284		186		295	228	494	78			96	325																		187
2.709		184		367	82					199	234	219	458		357	165	83	550	465	1078		186		204	101	324				138	300
2.838		69		341							251	177	356		236		5	562	388	1033		170		195	143	188				153	284
2.967				347									261		71			520	314	863					80						351
3.096				246									264					546	145	685											377
3.225				206									279					451	308	512											351
3.354				186														391
3.483				102														328
																		167
n=	103										Isy639 phase II I 5d
Length	Q-nMTbundle intensity		3	4	5	6	7	8	9	10	11	12	13	14	15	16	17	18	19	20	21	22	23	24	25	26	27	28	29	30	31	32	33	34	35	36	37	38	39	40	41	42	43	44	45	46	47	48	49
0
0.129																	21																	169					251
0.258					190					164							97						7			71				225			327	231				132	278	59			44
0.387		493	370		295	487	90		381	252		33		335			276	147					271	178	355	189		210	129	287	109	122	459	264		256	164	313	369	344	158	221	189	148		174			511
0.516	725	808	514	708	640	884	554	817	854	437		316	502	692	1008	876	474	293	615	468	974	438	287	624	510	422	552	565	375	620	403	224	655	812	538	679	700	520	881	535	347	574	638	600	482	602	1075	211	792
0.645	1940	1945	970	1399	681	1199	1103	1642	1204	990	2329	307	1092	1287	1873	1685	606	174	1715	1545	2250	1470	398	1291	1963	781	1333	1006	494	1012	827	1856	1067	1060	1089	1274	1045	714	606	1332	427	1055	1430	665	970	1009	2346	1298	1533
0.774	2647	2774	1466	1802	792	1977	1478	3189	1159	1591	3262	231	1563	1897	2581	2460	743	247	2152	2583	3206	2214	468	1876	3437	939	1978	1785	574	1272	1311	4179	1779	1667	1839	1854	1478	598	728	1912	525	960	1681	880	1901	1560	3519	2105	2432
0.903	2898	2833	1346	2314	686	2327	1334	3892	1619	1533	3098	135	1411	2359	3051	2804	562	462	2055	3785	3131	2289	268	2017	3433	1131	2470	2693	736	1367	1405	3285	2356	1833	2469	2018	1315	363	659	1958	574	1122	2169	990	2737	1389	4245	2638	3567
1.032	2940	3272	1309	2765	928	1795	1818	4014	1344	1532	1910	171	1243	2388	2757	3389	260	488	2257	3903	3032	1942	116	2024	3909	1130	2180	2456	686	1582	1370	3020	2204	1628	2641	1863	1238	523	685	1721	372	1109	1839	1027	4116	1392	3998	2776	3260
1.161	2405	2932	1129	3075	1074	2057	1777	3288	1417	1381	998		1157	2373	2883	2916	511	779	2348	3540	2760	1584	-217	2136	3255	919	2398	2841	644	1695	1051	2229	2404	1641	1968	1822	1040	549	516	1162	329	931	1579	1132	4590	1714	3799	3037	2886
1.29	2727	2543	1214	2637	1527	2156	1283	3489	1068	1220	1161		1200	2076	2829	2763	473	502	2272	3426	2512	1271	44	1897	3217	936	1989	2575	626	1290	933	1742	2335	1836	2040	1440	992	405	586	781	236	1398	1282	1305	3811	1576	3247	2529	2736
1.419	2337	2229	921	2497	1588	2194	1446	3366	956	1092	844		1326	1419	2847	2849	590	127	2150	2579	2644	1037	154	1513	2405	582	1702	2715	360	1313	796	1404	2120	1376	1480	1078	986	99	674	646	227	1056	1027	1442	3042	2124	3328	2476	2084
1.548	2135	2304	695	2300	1551	2013	1456	2976	959	945	429		1288	1005	3005	2664	284	135	1906	2640	2359	883	11	1078	2704	589	1234	2946	302	1445	961	1119	2158	1644	899	1044	718	150	383	447	181	1135	918	1468	1779	1455	2573	2264	1972
1.677	1841	1384	528	1884	1391	2193	1560	2441	632	892	64		1022	913	2964	2542	297	300	2015	2133	2284	721	-86	567	2158	338	1251	2446	160	1228	770	813	2032	1275			575	98	379	348	-50	804	636	1371	1212	1434	2523	2001	1975
1.806	1969	888	234	1941	1218	1904	1111	2570	609	593			1244	531	3223	2195	134	438	2118	1889	2077	314		242	2282	297	1222	2059	159	1130	666	718	1867	1246			284		349		65	734	533	1307	713	905	1557	2139	1789
1.935	1666	451	182	1136	1204	1445	340	2259	485	613			1127	483	2973	1856	218	255	1412	1457	1582	389			1815		919	1905	171	1193	791	464	2012	1050			76		443		60	613	366	1347		414	499	1853	1662
2.064	1242	264	48	1082	894	1389	336	2065	591	100			1052	383	3075	1903	253			1065	1184	421			1934		643	1568	103	1119	542	283	1964	934					318		98	734	536	1362		354	-40	1669	1457
2.193	1020				530	1066		1720	451				1069		2660	1207	182			942	798				1596			1442	83	1000	402	311	1501	724					297		75	802	326	1076		240		1381	880
2.322	779				451	787		1835	439				534		2248	952				373	356				1503					723	175		1426	558					137		72	328	576	778				1265	807
2.451					857	704			216				79		2278	912				294					1326					546			1133	521					208			360	349	495				1077	505
2.58					718	721			188				-51		1756	432									1288					428			959	330					188			103	268	429				501	224
2.709					566	513							112		877	391									864					267			893	94					205					309
2.838					466	351									316	287									657								806	182					132
2.967					464	77									109	358									323								801
3.096					207	118																			193								751
3.225																																	407
n=	50										Isy702 phase II i 5d
Length	Q-nMTbundle intensity		3	4	5	6	7	8	9	10	11	12	13	14	15	16	17	18	19	20	21	22	23	24	25	26	27	28	29	30	31	32	33	34	35	36	37	38	39	40	41	42	43	44	45	46	47	48	49
0																																								32		54				104
0.129	183																																							60				1		133	154	103
0.258	65	227				79	109	86						98				119							36			20	66		275				176	70	65			112	124	50	73	157	64	0	103	147	234
0.387	186	285	202	211	186	211	225	289	161	82	97	227	144	159	381	140	216	173	159	190	338	195	136	422	345	459	197	67	307	156	226	94	115	212	194	140	73	485	411	234	222	341	333	176	212	177	132	0	213
0.516	550	391	464	380	460	440	396	541	291	302	405	432	299	589	724	367	499	216	347	306	666	522	474	842	548	1164	321	251	706	346	672	433	305	305	436	428	298	937	922	328	370	707	470	402	714	367	445	259	437
0.645	1597	507	844	535	625	875	774	780	655	334	988	783	218	1345	656	547	771	357	614	528	1149	642	511	1382	755	1955	508	512	886	445	1115	1271	525	408	650	694	248	1489	1282	419	641	903	543	888	932	345	269	354	642
0.774	2152	667	832	647	600	1064	959	855	934	399	1786	854	238	1932	779	526	499	259	672	1190	1589	576	582	1297	750	1573	785	539	1077	420	957	1259	721	682	1054	1121	330	1672	1243	401	542	790	465	693	1148	43	360	298	503
0.903	2104	825	780	513	511	1042	659	879	901	397	2052	761	255	2072	1503	544	490	513	563	1382	1519	755	504	949	1088	552	962	333	971	424	1244	1267	751	957	1529	1399	290	1439	1172	344	375	748	390	947	1171	109	432	219	319
1.032	1866	724	585	219	598	1075	718	824	726	415	1909	853	284	1164	1224	456	513	481	531	800	1641	574	449	656	959	298	1179	570	914	452	1150	1366	441	716	1399	1353	290	1440	1036	242	396	730	440	631	762	131	286	212	286
1.161	1527	615	706	5	596	1156	493	648	575	384	1537	852	304	918	1112	517	523	541	714	510	1137	451	338	379	900	471	1103	510	776	511	1173	1382	422	932	1163	1161	285	1354	818	208	516	616	387	715	797	193	282	385	346
1.29	1283	562	763	8	649	1058	344	601	239	301	1215	901	-19	886	833	427	150	377	485	262	859	437	321	415	570	999	941	386	579	638	1109	1038	469	829	1241	1212	287	1194	406	220	466	603	377	710	833	70	130	273	356
1.419	1096	563	570	42	561	803	262	547	436	265	757	827	-61	696	906	427		212	316	276	654	261	353	420	225	846	866	314	565	679	897	960	425	612	1044	946	157	897	585	232	627	498	240	540	762	11	301	352	320
1.548	750	416	401	19	549	696	421	524	159	125	407	804	159	824	989	177		103	205	241	490	384	291	379	27	760	726	262	563	370	797	1003	366	600	942	471	132	850	334	108	548	273	225	688	797	12	266	211	394
1.677	521	279	505	56	448	576	211	480			667	665	162	614	610	169				203	142	250	60	243		572	573	66	209	325	590	613	313	697	902	266		743	390	79	557	151	173	586	588		222	249	326
1.806	363	78	300		360	613	63	349			287	542		6	270	143				189	93	115	11	269		326	556		175	291	322	560	274	710	875	278		519	8		464	263	94	468	629		124	159	82
1.935		21	0		349	527		255			199	410				277				286		4	23	253			311		172	176	66	214	178	539	947	55		436	146		406	105	105	278	338		47	4	25
2.064			49		438	168		225				470				268								198			261		56	169		143	123	551	765	36		326	113		397		118	352	142			62	25
2.193			105		351			246				350				191											254		93	61		123	121	623	310			294			304		114	298	369
2.322			209		110			152				199				248											439		72				187	513	173			59			340		137	194
2.451			207					61				166				144											272						184	563	134						94			266
2.58			175					134				55															46						92	521										169
2.709												2																					14	448										164
2.838																																	45	178
2.967
3.096
3.225
[truncated: 55 more columns]
