# Supplementary material for: A stable microtubule bundle formed through an orchestrated multistep process controls quiescence exit
Source: eLife. 2024 Mar 25;12:RP89958. doi: 10.7554/eLife.89958 (PMC10963028; doi:10.7554/eLife.89958)
Supplement: Figure 3—figure supplement 1—source data 1. [file elife-89958-fig3-figsupp1-data1.xlsx]

## Sheet: Feuil1
	Entry +48h 37°						Entry quiescence + 3d 25° + 48h 37°
	WT I	Isy248 I	WT II	Isy248 II	Isy249 II		wT +noc	Isy248+noc	Isy249 +noc	WT -noc	Isy248 -noc	Isy249 -noc
n=	93	173	109	103	128	0	220	116	200	216	118	121
Mean	1.62341	0.725457	1.61868	0.739359	0.740352	#DIV/0!	1.43276	1.37395	1.32129	1.35347	1.48334	1.42917
SD	0.593744	0.392255	0.700726	0.367852	0.303574	#DIV/0!	0.521899	0.594614	0.487254	0.510202	0.53289	0.43249
T-test		5.98397e-26		6.14352e-23	0.982467			0.0461055		0.0416342	0.028991
	1.782	0.419	3.916	0.405	0.955		2.165	1.385	1.952	2.065	1.797	1.289
	1.602	0.542	1.625	0.453	0.816		2.408	1.588	1.892	1.582	2.111	1.898
	1.703	0.401	2.614	0.389	0.516		0.62	1.665	1.259	0.742	0.975	1.291
	2.5	1.097	1.244	1.018	0.725		1.693	1.582	1.484	2.368	0.525	2.064
	2.176	1.001	2.595	0.521	0.559		2.157	1.082	0.989	0.939	1.524	1.135
	2.029	0.34	1.29	0.679	1.045		1.847	2.888	1.261	0.912	1.046	1.327
	2.014	0.548	1.608	1.993	0.716		1.369	2.566	1.847	2.623	2.118	1.265
	1.721	1.464	0.769	0.286	1.038		0.894	1.459	1.71	1.88	1.851	1.849
	1.609	0.331	1.195	1.069	0.852		0.612	1.096	1.455	2.212	1.8	1.054
	0.98	0.61	1.08	0.653	0.879		1.4	1.364	1.154	1.474	1.654	1.437
	2.138	0.403	3.505	0.866	0.163		0.756	1.084	0.871	1.876	1.096	1.596
	1.448	0.753	2.51	0.258	0.551		1.294	0.664	1.415	1.962	1.73	1.612
	1.677	0.368	2.546	0.889	0.854		1.46	1.161	1.432	0.785	1.327	0.731
	1.284	0.89	1.413	0.816	0.488		1.622	1.19	2.129	1.546	0.926	1.254
	1.702	0.374	1.625	0.329	0.295		1.31	1.487	0.493	0.71	1.712	2.003
	2.425	0.641	2.482	0.657	0.689		1.454	2.054	0.47	1.529	2.004	0.731
	2.585	0.403	1.666	0.472	0.865		2.141	1.532	1.586	1.2	0.559	1.558
	2.662	0.411	1.172	1.105	0.769		0.876	1.533	1.194	1.145	1.465	2.312
	2.233	1.026	3.15	0.611	0.747		1.516	1.197	1.638	2.069	1.525	1.792
	0.825	0.469	2.497	0.601	1.165		2.438	1.356	1.428	1.633	1.593	1.935
	2.179	0.979	1.43	0.774	1.012		1.214	0.684	1.369	1.485	0.761	1.885
	1.912	0.49	1.453	0.365	1.109		1.974	0.908	2.077	0.912	0.577	1.17
	1.874	0.447	1.51	1.226	0.933		0.94	1.924	0.913	0.876	2.714	1.11
	1.495	0.438	1.494	0.516	0.988		2.04	1.612	0.485	1	1.301	1.393
	1.762	0.74	1.418	0.808	0.802		1.129	2.079	1.69	1.419	1.621	1.52
	0.99	1.468	1.494	0.629	1.56		1.643	0.905	1.91	1.62	1.371	1.591
	1.903	0.362	1.584	0.933	0.982		0.775	0.91	0.68	0.959	0.559	0.966
	1.426	0.461	1.223	0.358	0.329		1.31	1.659	1.183	1.399	0.789	1.259
	2.099	0.528	1.126	0.462	1		0.665	1.566	1.665	2.009	1.217	1.161
	2.048	0.678	2.329	0.854	0.644		1.543	1.458	1.264	1.642	1.382	1.3
	1.73	0.87	2.045	0.792	0.997		2.593	1.607	0.646	0.541	0.406	1.106
	1.612	0.404	1.743	0.703	1.446		2.061	1.477	1.596	1.323	1.485	1.334
	2.016	1.088	3.837	0.771	0.854		2.063	1.29	1.118	1.388	1.933	1.678
	1.333	1.865	1.843	0.429	1.266		1.575	0.987	0.276	2.064	0.816	1.849
	1.345	0.528	1.488	0.559	0.891		1.487	1.839	0.62	1.184	1.478	1.371
	2.657	0.662	0.787	1.064	1.314		1.68	1.643	1.037	1.952	1.377	1.095
	1.571	0.454	2.391	0.711	0.455		1.347	2.526	0.801	2	1.265	1.933
	1.617	1.458	1.409	0.387	0.921		1.879	0.549	1.516	1.809	1.283	1.853
	1.518	0.836	1.407	0.417	1.06		1.256	1.452	1.529	1.784	1.442	1.095
	3.163	0.581	1.349	0.187	1.287		1.776	1.884	1.602	2.161	2.294	1.129
	3.102	1.25	1.541	0.567	0.48		2.481	1.612	1.169	1.326	1.054	1.135
	2.704	0.458	2.18	1.206	0.64		2.483	0.361	1.781	2.058	1.485	1.722
	1.34	1.475	2.147	0.865	0.763		2.191	1.126	1.379	0.787	1.254	1.661
	0.722	1.531	1.374	0.329	0.577		1.184	1.991	1.46	1.024	1.294	0.99
	1.537	0.563	1.493	0.533	0.8		1.165	1.95	0.886	2.085	1.369	1.367
	1.792	0.982	2.229	0.901	0.673		1.737	1.163	1.519	0.94	1.537	1.773
	1.362	0.412	1.473	0.83	0.566		1.001	0.52	1.582	0.595	1.886	0.981
	1.785	0.707	1.473	0.304	0.82		2.355	1.506	1.323	1.217	1.041	0.639
	2.353	0.951	1.186	0.506	1.257		1.212	1.012	1.748	1.683	2.791	1.504
	2.276	0.424	1.832	0.577	0.75		1.033	1.856	1.134	0.841	1.256	1.954
	1.445	0.439	1.859	0.345	0.405		0.917	1.42	1.425	2.226	1.039	1.91
	0.976	0.41	0.65	0.358	0.497		1.593	1.516	1.432	1.268	1.69	1.46
	1.63	0.366	2.385	0.621	0.346		0.859	1.406	0.26	1.666	1.27	1.705
	2.558	0.861	1.573	0.801	0.699		1.33	1.937	1.356	1.368	2.08	1.17
	1.187	0.924	1.12	1.632	1.177		1.422	1.3	2.302	1.744	1.67	1.808
	1.665	1.761	2.569	1.376	1.12		1.948	1.933	1.87	1.809	2.245	2.211
	1.971	0.696	1.376	0.346	0.746		0.908	2.486	1.58	1.437	0.597	1.294
	2.08	0.358	0.85	0.572	0.692		0.484	1.458	0.917	0.484	3.144	1.442
	1.44	0.371	1.126	0.315	0.401		1.623	1.396	0.616	1.602	0.559	1.661
	0.497	0.687	1.19	0.256	0.779		1.677	0.456	0.653	0.903	1.838	1.062
	0.987	0.452	1.148	0.375	0.462		1.097	0.94	0.73	0.731	1.52	1.273
	1.777	0.438	1.244	0.401	0.358		1.118	1.612	2.176	2.062	0.751	1.308
	0.7	0.368	1.186	1.261	0.923		1.271	0.204	1.774	0.434	1.66	2.176
	2.376	0.403	1.223	0.773	0.891		0.742	0.529	0.801	1.072	1.8	0.914
	2.073	0.924	1.165	0.948	1.131		0.355	1.586	1.602	1.69	2.161	1.889
	1.4	1.108	1.26	1.376	0.358		1.82	2.072	0.748	1.774	2.877	0.981
	1.239	0.658	1.185	1.131	0.83		1.371	0.62	1.588	1.442	1.308	1.301
	0.85	0.765	2.163	0.691	0.845		1.297	1.645	1.496	0.857	1.442	1.346
	1.387	2.202	2.049	0.968	0.548		0.537	1.417	1.762	1.569	2.236	1.231
	0.526	0.433	1.159	0.803	0.416		1.8	0.491	1.784	1.746	1.625	2.434
	0.366	0.394	1.666	0.955	0.387		1.916	1.551	1.676	1.875	1.47	1
	1.713	0.365	1.371	1.012	0.59		1.114	0.886	0.343	0.376	1.164	0.962
	2.037	0.833	1.515	1.548	0.577		1.517	1.76	1.557	0.735	0.639	0.904
	1.29	0.485	1.26	0.719	1.258		1.134	1.691	1.372	2.075	0.885	1.015
	1.418	0.564	1.149	0.82	0.806		0.868	2.818	0.979	0.959	1.254	1.686
	1.173	1.28	0.944	0.774	0.224		1.368	1.918	0.476	1.003	1.385	1.136
	1.95	0.564	0.724	0.329	0.5		1.628	1.422	0.322	2.253	1.129	1.36
	1.519	0.394	0.907	0.648	0.699		1.854	0.488	1.002	0.93	0.919	1.691
	0.449	0.594	1.459	0.385	0.405		1.261	0.484	1.387	1.025	2.517	1.515
	2.073	0.32	0.521	0.973	1.017		1.012	0.839	1.4	1.92	2.185	1.813
	1.249	0.534	2.294	0.795	0.389		1.288	0.665	1.724	1.631	1.655	1.089
	0.376	1.342	1.028	0.611	0.75		0.775	0.868	1.457	1.607	1.161	0.716
	1.4	0.733	0.603	0.417	0.224		1.46	1.717	1.064	1.511	1.388	1.505
	1.669	0.331	1.86	0.609	0.618		1.025	1.209	1.211	0.745	1.527	1.034
	1.51	0.368	1.038	0.416	0.545		1.197	0.356	2.034	0.684	1.811	2.115
	1.016	0.524	1.088	1.087	0.497		1.656	3.954	1.71	1.449	2.128	1.551
	1.143	0.822	1.498	1.088	0.429		1.414	1.525	1.367	0.465	1.136	1.143
	1.097	0.759	1.12	0.678	1.038		0.361	1.835	1.129	1.231	0.367	1.565
	0.497	0.388	1.498	0.761	0.687		0.775	0.798	1.861	1.278	0.865	1.461
	0.808	0.693	1.228	0.536	0.739		1.612	1.172	0.62	0.329	1.596	1.395
	1.591	0.354	2.306	0.577	0.73		2.322	1.341	1.415	1.02	2.708	1.646
	2.158	0.388	1.468	0.917	0.941		0.817	0.917	1.817	1.506	1.062	2.979
	1.393	0.388	2.658	0.675	0.59		1.618	1.181	0.987	1.807	1.867	1.586
		0.327	1.069	0.275	0.761		1.449	1.651	0.319	1.405	1.411	2.266
		0.322	0.828	0.874	0.929		1.925	1.214	1.449	1.601	1.807	1.387
		0.871	1.594	0.889	0.638		1.516	0.844	1.269	1.691	1.67	1.661
		0.433	1.593	1.537	0.326		1.197	2.5	1.688	1.824	1.982	1.366
		0.892	0.85	1.632	0.962		1.14	1.38	1.444	1.169	1.635	0.993
		0.44	2.265	2.054	0.559		1.714	1.399	1.632	1.959	1.782	1.808
		1.147	2.137	0.737	0.673		0.742	1.419	1.876	1.784	1.316	1.691
		0.396	2.996	0.66	0.387		0.78	1.112	0.322	1.181	1.885	0.811
		0.463	2.294	0.607	0.417		2.458	0.623	0.983	0.88	1.923	1.313
		0.525	2.233	0.577	0.517		1.914	0.918	1.449	1.834	1.768	0.816
		0.419	0.863		0.396		0.761	1.918	0.297	1.48	2.001	1.933
		0.678	1.222		0.761		0.775	1.503	2.264	1.181	1.204	1.068
		1.076	0.854		0.329		1.471	1.28	1.673	2.971	1.796	1.034
		0.654	0.905		1.375		1.343	1.129	1.101	1.026	1.646	1.29
		0.465	0.535		0.722		1.428	1.575	1.546	0.976	1.806	1.385
		0.816	3.725		0.621		1.504	1.825	1.71	0.822	1.276	1.544
		0.759			0.362		1.096	1.567	1.405	0.68	1.339	0.732
		1.293			0.711		1.673	1.847	1.244	1.575	1.425	0.966
		1.632			1.35		2.362	1.605	0.698	1.047	1.143	1.424
		0.441			0.506		1.826	0.361	0.937	1.847	0.7	2.044
		0.361			1.038		1.451	0.595	0.258	1.63	1.376	1.796
		1.471			0.375		1.33	0.408	0.714	1.971	1.5	1.121
		0.383			0.449		1.316	0.897	1.767	0.868	1.411	2.1
		0.839			0.417		1.35		1.091	1.419	1.598	0.525
		0.642			0.704		1.532		0.962	2.397	0.928	0.49
		0.346			0.512		2.042		2.183	0.451		2.014
		0.368			0.725		2.1		1.387	1.183		1.216
		0.514			0.643		1.2		0.847	1.064		1.036
		0.412			1.581		2.222		0.388	1.258
		1.198			0.389		1.284		1.721	1.714
		1.288			1.361		1.717		1.163	1.375
		0.365			0.618		1.957		0.94	1.284
		0.42			0.673		1.212		2.473	1.189
		0.542			1.25		2.077		1.963	1.114
		0.925			0.601		1.774		1.819	1.688
		0.766					1.227		1.033	1.184
		0.51					1.258		1.227	0.608
		1.165					1.195		1.396	1.97
		0.884					1.455		1.163	0.78
		0.597					0.388		1.813	1.413
		0.65					1.419		0.917	1.516
		0.499					1.444		1.503	1.8
		1.439					1.746		1.14	1.053
		1.08					0.62		0.809	0.816
		0.736					2.259		1.721	1.074
		1.006					1.53		1.101	1.209
		0.952					1.533		0.824	1.487
		0.399					2.044		1.05	1.65
		0.592					1.512		1.631	0.276
		0.999					1.824		1.169	0.993
		0.937					1.378		1.905	0.847
		1.384					1.666		1.004	1.489
		0.953					1.516		1.269	1.204
		1.096					1.29		1.712	1.29
		2.034					2.588		1.763	1.457
		0.587					1.853		2.161	1.316
		0.549					1.742		1.743	0.996
		0.56					0.479		1.44	0.981
		0.797					2.744		0.814	1.887
		0.868					1.145		1.278	1.658
		1.063					2.316		1.46	0.377
		0.433					1.517		1.432	0.877
		0.901					1.942		2.044	0.838
		0.411					1.294		0.462	1.102
		0.597					1.877		0.844	1.025
		2					0.801		1.246	1.962
		1.106					1.358		1.095	1.245
		0.39					0.742		0.42	2.585
		0.376					0.922		1.163	1.575
		0.355					1.749		1.453	1.008
		0.563					1.446		1.318	0.404
		0.581					1.697		1.813	1.395
		1.106					2.25		0.936	0.761
		0.39					1.717		0.78	1.451
		0.592					1.677		1.942	1.11
		0.512					1.008		1.096	0.549
		0.381					0.479		1.19	0.721
		0.658					1.884		1.947	0.451
		0.536					0.814		1.632	0.388
		1.769					1.685		0.949	2.073
							0.653		2.515	1.28
							1.14		2.062	1.457
							2.208		1.532	1.621
							0.975		2.386	1.197
							1.316		1.463	2.227
							1.82		1.169	1
							0.589		1.742	2.096
							0.707		1.158	1.703
							0.97		1.601	1.198
							2.106		1.068	0.807
							2.424		1.986	1.662
							2.006		1.267	1.948
							1.52		0.78	1.724
							1.518		0.981	0.993
							1.651		0.88	1.002
							0.698		0.871	1.907
							1.065		1.018	1.2
							1.916		2.128	1.431
							1.056		1.239	0.704
							1.265		1.643	0.917
							1.582		1.829	1.879
							2.309		1.112	1.952
							2.066		1.387	0.909
							0.924		0.71	0.837
							0.343		0.9	1.14
							0.462		1.802	1.328
							0.767		1.839	2.054
							1.757			1.422
							1.556			0.646
							1.129			1.234
							0.735			1.095
							1.848			1.323
							1.512			1.195
							1.278			1.125
							1.254			1.387
							0.662			1.959
							2.207			1.612
							0.292			0.584
							1.846			2.156
							1.593			2.234
							1.877			1.682
							0.987			1.596
							1.3			0.904
							0.97
							1.543
							1.184
							0.968
