# Supplementary material for: A stable microtubule bundle formed through an orchestrated multistep process controls quiescence exit
Source: eLife. 2024 Mar 25;12:RP89958. doi: 10.7554/eLife.89958 (PMC10963028; doi:10.7554/eLife.89958)
Supplement: Figure 3—figure supplement 1—source data 2. [file elife-89958-fig3-figsupp1-data2.xlsx]

## Sheet: Feuil1
	WT 37 DMSO		WT 37 noc		WT 25 DMSO		WT 25 noc		sli15-3 37 DMSO		sli15-3 37 noc		sli15-3 25 DMSO		sli15-3 25 noc
n=	370	213	359	201	221	231	230	224	221	205	224	312	227	0	224
Mean	1.324	1.43127	1.17506	1.29393	1.55562	1.40884	1.49235	1.34734	0.827425	0.830893	0.628429	0.702013	1.40276	#DIV/0!	1.42543
SD	0.468255	0.508067	0.441507	0.438341	0.60784	0.641204	0.582845	0.527993	0.489556	0.454117	0.379196	0.364831	0.613177	#DIV/0!	0.597616
T-test strain	1.10402e-59	nd	1.10385e-89	nd	0.12245	nd	0.922926	nd	nd	nd	nd	nd	nd	nd	nd	nd
t-test intrastrain	0.0119357	nd	0.00227829	nd	0.0128302	nd	0.00566887	nd	0.939585	nd	0.0248419	nd	#DIV/0!	nd	#DIV/0!	nd
t-test +- Noc	4.70358e-08	nd	nd	nd	0.119403	nd	nd	nd	3.50602e-08	nd	nd	nd	0.664645	nd	nd	nd
	Data1	Data2	Data1	Data2	Data1	Data2	Data1	Data2	Data1	Data2	Data1	Data2	Data1	Data2	Data1	Data2
	1.099	1.597	3.291	1.757	1.784	2.102	3.251	1.332	1.814	1.096	0.611	1.205	3.32		2.934
	1.892	1.486	1.231	3.51	1.818	1.186	2.688	0.968	1.17	1.062	0.847	0.367	2.541		1.644
	1.814	1.056	1.923	1.327	1.336	2.373	2.837	1.774	0.639	0.439	0.551	0.616	2.459		1.316
	2.283	1.539	1.278	1.455	2.258	2.48	2.05	2.096	0.518	0.766	0.336	0.599	1.587		1.024
	1.418	1.452	1.078	2.475	0.662	1.852	2.397	1.03	1.155	0.532	0.845	0.68	1.451		4.211
	2.024	2.26	1.154	1.131	1.335	3.621	2.132	1.678	1.346	1.085	0.344	0.639	1.032		0.408
	2.138	1.851	0.946	1.293	1.861	1.165	1.217	2.025	0.424	0.762	0.473	0.406	0.953		2.257
	1.4	1.355	2.675	1.293	0.798	1.045	1.588	0.69	0.367	1.468	0.551	0.389	1.816		1.14
	0.655	1.652	1.29	1.195	3.139	0.78	1.451	2.032	0.604	2.025	1.217	0.463	2.132		2.198
	0.865	1.571	0.68	1.605	1.697	1.209	1.827	1.226	2.262	0.43	0.716	0.693	1.806		2.889
	1.746	2.176	1.815	1.3	1.064	0.97	1.512	0.822	1.695	1.472	0.518	0.997	1.344		1.04
	1.259	2.284	1.158	1.126	0.851	1.48	0.368	0.458	0.518	0.877	0.616	0.344	0.94		0.755
	0.827	0.616	1.168	1.143	2.744	1.119	0.548	0.525	1.181	1.265	0.463	0.966	1.871		0.52
	1.265	2.178	1.889	1.056	1.945	1.633	0.967	1.419	1.195	1.121	0.947	0.602	0.755		1.372
	0.602	1.246	1.628	0.742	0.865	0.664	1.87	2.639	0.602	0.939	0.544	1.022	0.47		1.278
	1.096	0.959	1.102	0.777	1.461	1.169	1.511	1.231	1.558	0.775	0.721	0.668	1.284		1.168
	1.036	0.664	0.83	1.285	0.376	1.39	2.108	1.417	0.49	1.347	0.406	0.566	1.018		1.575
	0.835	1.901	1.247	1.923	2.73	1.517	0.6	1.246	0.367	0.327	0.367	0.751	1.548		1.231
	2.251	1.827	1.42	0.912	2.223	0.949	1.441	1.449	0.304	2.324	0.439	1.198	2.161		2.253
	1.535	1.666	1.004	1.082	2.362	2.646	2.601	1.234	1.414	0.566	0.673	0.616	1.417		2.065
	0.993	0.614	1.24	0.871	2.016	1.887	1.916	1.548	2.09	0.449	0.577	1.377	1.676		2.122
	1.019	2.091	0.481	1.612	1.676	0.787	2.187	0.574	0.835	1.088	0.751	1.771	1.228		1.361
	1	0.857	1.431	1.553	1.833	2.193	1.163	1.678	1.377	1.205	0.49	0.424	0.337		1.28
	1.278	1.463	1.102	1.05	2.051	0.841	1.018	1.987	0.385	0.43	0.716	0.406	2.238		1.444
	1.046	1.428	1.768	2.032	1.415	2.308	1.471	1.574	1.619	0.389	0.518	0.465	1.551		1.037
	1.003	0.952	1.35	1.118	0.94	2.003	1.246	1.798	0.895	1.581	0.561	0.449	0.996		1.578
	2.41	1	0.304	0.571	2.144	0.64	0.58	1.219	0.981	0.288	0.288	0.95	0.936		1.518
	1.694	0.982	1.306	1.56	0.736	1.284	1.593	1.978	0.481	1.923	0.347	1.096	0.653		1.648
	0.389	1.813	0.424	1.633	1.347	0.822	2.135	1.347	0.262	0.732	0.408	0.716	1.013		0.931
	1.022	1.793	1.319	1.632	2.673	1.613	1.644	1.628	0.904	0.616	0.251	0.599	1.544		0.439
	0.732	1.546	1.129	1.012	1.71	1.385	1.441	1.744	1.143	1.204	0.336	0.658	1.402		1.102
	0.616	1.405	0.826	1.205	1.133	1.161	0.939	1.653	0.716	0.789	0.705	1	2.338		1.485
	0.501	1.42	1.075	1.511	1.279	1.368	1.369	1.583	0.481	0.761	1.083	0.597	1.261		1.522
	1.849	1.792	0.426	0.897	1.709	2.443	0.731	1.405	0.275	0.886	1.366	0.655	1.98		1.596
	1.189	1.56	0.457	0.841	1.413	0.51	1.056	1.306	0.406	0.651	0.731	1.198	1.836		1.417
	0.923	0.448	0.848	1.316	0.484	0.548	0.714	2.058	1.333	0.432	0.426	0.288	1.118		1.464
	1.075	1.2	1.238	2.057	0.857	1.969	1.3	2.122	0.481	0.539	0.251	0.635	0.548		1.437
	1.385	1.593	0.155	1.284	2.093	1.177	1.939	1.056	0.432	0.523	0.406	0.639	1.755		1.29
	1.999	2.396	2.289	1.013	1.452	1.789	2.488	1.084	0.789	0.672	0.232	2.006	2.33		1.318
	1.119	1.651	0.503	1.103	1.355	0.761	1.29	1.373	2.15	0.387	0.389	0.52	1.516		1.482
	1.119	1.245	1.55	1.133	0.532	2.387	1.615	1.472	0.577	0.566	0.877	1.252	1.864		0.71
	1.118	1.194	1.04	1.467	1.361	1.729	1.329	1.807	1.395	0.793	0.503	0.808	1.068		0.767
	1.158	1.389	0.845	1.69	1.578	2.169	0.886	1.367	0.789	0.232	0.355	0.791	0.725		1.392
	1.015	1.62	1.078	0.62	1.129	1.241	1.241	1.933	0.928	0.732	0.604	0.424	2.195		1.372
	1.75	1.361	0.939	0.735	1.683	2.372	1.395	1.618	2.109	1.655	0.518	0.602	3.171		1.212
	1.366	1.524	0.608	1.012	1.806	1.665	0.976	0.347	0.43	0.525	1.106	0.473	1.697		2.265
	1.015	1.302	1.118	0.555	1.48	0.962	1.557	1.647	0.928	0.336	0.635	1.271	1.256		2.122
	1.952	1.133	1.634	2.124	1.776	2.112	2.259	1.591	0.904	0.304	0.616	1.659	2.642		1.63
	1.217	1.516	1.099	2.207	1.326	2.451	1.471	1.862	1.581	1.119	0.367	1.465	2.127		1.216
	1.125	2.6	1.327	1.532	1.948	1.644	1.438	1.676	1.054	0.635	0.693	0.616	1.829		1.727
	0.518	2.09	0.904	0.824	1.072	0.563	0.564	1.448	0.463	0.574	0.68	0.735	1.683		1.076
	0.432	1.517	0.385	1.853	1.241	0.861	1.614	1.426	0.574	1.773	1.771	0.327	0.767		2.186
	1.168	1.809	1.064	1.29	1.072	0.917	1.163	1.101	0.182	0.616	0.52	0.327	1.302		2.746
	1.308	1.294	1.371	1.183	1.677	1.326	0.742	1.438	0.367	0.424	1.125	0.304	2.172		0.949
	0.355	0.807	0.808	0.892	2.244	1.501	1.405	1.432	0.457	0.396	0.774	0.347	1.91		1.615
	0.561	1.228	1.388	1.091	1.583	2.121	2.152	1.658	0.215	0.645	0.639	0.251	1.798		1.208
	0.981	1.224	1.265	0.347	1.474	1.709	3.075	1.703	1.301	0.518	0.886	0.503	0.623		0.952
	1.195	1.674	0.262	1.264	1.123	1.402	1.163	0.689	0.355	1.033	0.301	0.457	1.471		0.798
	0.766	1.084	0.962	0.936	1.627	0.69	1.638	1.212	0.408	0.822	0.705	0.816	2.093		1.516
	0.645	0.602	1.701	1.065	2.081	1.612	1.02	0.937	0.406	0.52	0.561	0.443	1.361		2.354
	1.283	0.361	1.125	1.834	2.372	0.894	0.851	0.753	0.443	0.439	0.808	0.396	0.42		1.816
	1.204	1.525	0.705	0.837	1.316	1.642	0.408	0.857	0.818	0.518	0.232	0.518	1.161		1.936
	1.619	1.426	1.078	1.29	1.355	1.013	1.246	1.168	0.752	0.439	0.424	0.989	0.71		1.118
	1.92	1.039	0.827	1.025	2.209	1.444	2.138	1.123	0.955	1.083	0.83	1.078	2.843		1.245
	1.196	2.356	0.635	1.235	1.039	2.308	1.838	2.098	1.598	0.816	0.803	0.827	2.519		1.638
	1.483	0.288	0.92	1.656	1.05	1.968	1.892	1.76	0.886	0.347	0.561	0.689	1.581		1.088
	1.553	2.232	1.504	1.256	2.801	2.417	1.781	1.483	0.43	0.37	0.313	0.544	1.763		1.642
	1.505	1.87	1.004	0.484	2.336	2.53	2.273	1.587	0.877	0.779	0.408	0.847	0.623		1.744
	1.032	1.393	1.654	1.316	1.289	2.425	1.232	0.982	1.52	1.058	0.775	0.551	1.583		1.333
	1.294	1.163	1.291	1.02	2.084	1.945	1.71	1.118	0.355	0.604	0.272	0.731	2.001		1.347
	1.125	1.692	0.886	1.485	1.469	0.337	0.759	0.809	0.854	1.316	0.947	0.766	1.114		1.252
	1.652	1.593	0.955	1.028	1.789	0.812	1.968	0.94	0.432	0.99	0.258	0.396	1.575		1.194
	0.52	1.101	0.877	1.148	1.235	1.496	0.716	1.177	0.68	0.523	1.347	1.088	1.419		1.354
	0.611	1.29	1.214	1.056	0.78	1.096	1.762	0.735	0.473	1.6	0.258	1.007	0.957		1.29
	0.907	1.89	1.335	1.19	2.582	0.721	0.936	1.358	0.389	0.301	0.129	0.946	2.225		1.789
	1.496	1.836	1.25	0.541	2.034	1.324	1.168	1.025	0.539	0.74	0.83	0.251	0.456		0.292
	0.347	1.785	0.87	1.224	1.62	2.292	1.424	2.175	0.347	0.432	0.516	0.406	1.605		1.402
	0.443	1.637	1.679	1.385	0.704	1.4	2.376	2.068	0.475	0.709	0.975	1.254	2.424		1.084
	0.762	1.72	1.143	1.847	2.606	0.462	1.827	0.827	0.288	0.365	0.385	0.865	0.671		1.775
	1.404	1.413	1.168	1.807	1.761	1.244	2.128	0.877	1.338	0.656	1.616	0.993	0.9		2.545
	1.289	0.419	0.791	1.183	2.568	1.387	1.58	0.868	0.501	0.695	0.396	2.015	1.152		1.548
	0.761	0.809	1.007	1.485	1.2	1.904	1.88	1.979	1.696	0.406	0.49	1.222	0.839		1.529
	0.406	0.912	1.034	1.875	1.615	1.441	0.976	0.822	0.7	1.125	0.791	0.827	1.675		1.151
	0.943	1.095	1.283	1.393	1.784	2.379	1.642	1.219	1.334	0.574	0.177	0.49	1.917		1.98
	1.704	1.241	1.55	1.564	2.048	0.725	1.588	1.356	0.74	1.293	0.962	0.997	1.343		0.755
	1.336	1.11	1.707	0.975	1.415	0.505	1.053	1.586	0.327	2.176	0.626	0.577	1.44		0.742
	1.273	1.923	0.83	1.646	0.337	0.349	2.122	0.78	0.611	0.827	0.49	1.442	0.577		0.6
	1.218	1.8	0.327	1.948	1.084	1.252	1.235	0.678	0.424	1.058	0.523	0.43	1.304		1.144
	0.62	0.913	1.695	1.081	0.871	0.365	1.415	0.689	0.639	0.775	0.396	0.561	2.467		1.779
	0.752	1.583	0.49	1.487	1.737	0.52	1.725	0.894	0.365	0.789	0.367	0.31	1.529		1.697
	1.757	1.245	0.457	1.739	0.714	1.621	1.28	0.707	1.199	1.036	0.336	0.561	1.066		1.727
	1.047	1.519	1.189	1.356	0.347	2.365	0.769	0.959	0.177	1.174	1.377	0.561	1.739		2.068
	1.75	1.602	0.827	1.588	0.982	1.646	1.409	1.658	0.232	1.313	0.365	0.439	2.031		1.82
	1.828	1.622	0.551	1.432	1.018	1.839	1.734	0.196	0.559	0.8	0.585	0.658	1.779		1.025
	1.52	1.246	1.733	1.572	2.48	1.19	1.449	0.93	0.313	0.95	0.122	0.947	0.646		1.845
	0.396	2.132	1.822	1.451	2.805	1.409	1.333	1.997	0.981	1.095	0.122	0.639	0.777		3.029
	0.854	1.228	1.068	2.016	0.581	0.88	0.955	1.264	0.327	0.732	0.585	0.585	1.963		1.441
	1.256	1.732	1.372	0.937	1.511	1.899	1.012	0.505	0.86	0.481	0.544	0.457	0.581		0.779
	1.36	0.696	1.064	1.072	1.318	1.792	1.221	0.979	1.334	1.414	1.058	0.86	0.653		1.14
	0.608	1.323	1.506	0.388	2.414	2.205	2.342	2.102	1.765	0.761	0.347	0.597	1.551		1.197
	1.24	1.648	0.947	1.258	1.56	1.405	1.905	1.818	1.885	0.389	0.347	1.598	2.534		0.658
	1.195	0.996	0.396	1.582	1.712	1.703	1.732	1.097	0.327	0.742	0.396	0.865	0.73		2.3
	1.472	1.134	1.078	1.143	0.742	1.069	2.168	0.716	0.789	0.539	0.439	0.481	0.552		1.846
	1.52	0.777	1.116	1.184	0.704	0.664	1.474	1.91	0.232	1.039	0.672	0.344	1.618		0.276
	0.993	1.039	0.646	1.648	0.735	2.435	0.841	0.593	0.336	0.658	0.304	0.457	1.294		1.172
	1.181	1.246	0.997	1.053	0.332	0.41	1.467	2.786	0.551	1.118	0.822	0.993	0.798		1.097
	1.849	1.82	1.619	0.505	0.714	1.03	2.239	0.581	0.947	0.83	0.288	0.532	0.868		1.396
	1.29	1.816	1.054	1.68	1.656	2.863	1.173	2.144	0.518	0.669	0.742	0.817	1.012		1.581
	1.382	1.581	1.498	1.236	1.453	0.29	1.118	2.159	0.457	0.645	0.975	1.118	1.165		1.424
	1.704	1.211	1.586	1.645	2.216	0.683	1.426	1.628	0.432	0.443	0.775	0.7	0.769		1.091
	1.143	1.254	1.04	0.981	2.539	0.721	1.025	1.35	1.306	1.211	1.52	0.43	1.717		0.996
	1.637	1.428	0.616	1.388	2.34	0.781	1.143	1.914	1.515	0.272	0.551	0.327	2.09		0.868
	1.5	1.214	1.377	0.777	2.631	1.313	1.208	1.252	0.518	1.635	0.827	0.465	0.873		1.904
	2.064	1.064	1.04	1.145	1.387	1.209	0.71	1.136	0.7	0.365	0.822	0.192	1.393		0.623
	1.813	3.081	1.125	1.302	1.703	0.985	0.695	1.627	0.516	0.848	1.058	0.847	1.098		0.595
	1.273	2.433	0.389	2.051	0.388	0.91	2.517	1.169	0.481	0.518	2.039	0.8	1.047		1.144
	1.35	1.761	1.247	0.983	1.5	1.19	0.88	1.662	0.313	1.007	0.481	0.668	1.67		1.764
	1.129	2.201	1.247	1.852	0.936	1.364	0.62	1.553	0.31	1.129	0.288	1.217	1.284		0.343
	1.273	1.187	1.085	1.968	1.487	0.721	0.851	0.865	0.408	0.886	0.473	0.465	2.503		1.415
	1.414	1.396	0.789	1.033	1.295	0.479	1.415	0.235	0.232	0.566	1.577	1.291	1.174		2.224
	0.693	1.736	0.544	0.88	2.551	2.124	1.226	0.277	0.574	0.424	0.258	0.426	1.2		2.089
	1.041	1.307	0.751	0.767	1.601	1.986	1.165	0.983	1.218	0.751	0.061	0.523	0.806		1.369
	1.828	1.112	1.404	1.948	1.771	0.501	0.993	1.033	1.034	0.993	0.579	0.355	1.977		1.189
	1.406	1.485	0.655	0.957	0.673	0.448	2.116	1.039	0.689	0.443	0.68	0.481	2.549		0.716
	1.336	2.45	0.426	1.316	0.868	2.348	2.032	1.306	0.561	0.775	0.463	0.62	0.976		2.431
	1.896	2.545	1.164	0.904	1.781	2.911	2.246	1.743	0.793	0.599	0.656	0.826	1.025		0.62
	1.369	1.952	0.532	0.957	1.942	1.174	1.818	1.56	1.901	0.822	0.367	1.808	1.827		0.905
	1.189	1.613	0.857	1.097	2.093	1.884	1.601	1.446	0.966	1.162	0.851	0.523	1.197		1.236
	1.451	1.938	1.241	1.208	1.449	1.94	1.097	1.214	0.966	2.016	0.155	0.523	0.913		0.968
	1.211	1.721	2.107	1.771	1.97	0.626	0.361	2.344	1.679	0.735	0.544	0.262	0.909		1.561
	0.579	1.219	0.779	1.161	1.084	0.595	1.174	2.076	0.43	0.68	0.52	0.616	0.852		0.935
	1.224	1.296	0.975	0.584	1.018	0.953	1.632	0.602	0.865	1.199	0.518	1.157	1.072		1.053
	0.736	0.47	0.626	2.058	0.923	0.62	1.938	0.551	0.518	0.585	0.481	0.882	1.211		2.167
	1.5	2.605	0.712	0.868	0.612	2.342	2.28	0.521	1.73	1.316	0.396	0.585	1.669		1.316
	0.975	1.87	0.947	1.709	1.354	2.597	1.076	0.753	1.136	0.336	0.155	0.962	2.47		0.847
	1.158	1.034	1.773	1.212	1.774	1.648	0.837	0.959	0.219	0.385	0.742	0.347	1.163		1.432
	1.395	1.706	0.803	1.467	0.937	1.638	0.923	0.102	0.716	0.68	0.7	0.347	1.101		2.782
	1.462	1.781	1.022	0.714	1.258	0.678	1.744	1.369	0.811	0.709	0.523	0.301	1.01		1.897
	1.505	2.246	1.29	1.236	1.859	0.851	1.371	1.804	1.506	0.457	0.793	1.17	1.396		1.343
	1.376	1.336	0.871	0.877	1.673	2.587	1.4	2.28	0.396	0.262	0.7	0.406	2.007		1.091
	1.395	1.35	0.847	1.646	1.172	0.953	0.288	0.678	0.775	0.327	0.262	1.015	2.512		1.193
	1.616	1.734	1.204	0.975	1.627	1.068	2.012	0.824	1.033	0.742	0.192	1.387	0.626		1.644
	1.579	1.2	1.429	1.209	0.684	1.39	1.073	1.111	1.654	0.597	0.449	0.449	1.148		1.259
	0.848	0.886	0.898	0.909	0.861	1.241	0.288	1.501	1.181	0.561	0.645	1.478	0.433		0.549
	0.871	1.854	1.216	0.937	1.55	1.204	2.213	1.72	0.93	0.923	0.313	1.853	1.795		0.652
	0.673	1.502	0.886	1.607	2.108	2.079	1.887	1.857	0.793	0.449	1.701	0.857	2.352		0.857
	1.6	1.183	1.101	1.682	1.432	0.448	1.494	1.809	1.471	1.247	2.372	1.389	0.759		0.859
	0.871	1.326	1.078	0.962	1.952	1.02	1.273	1.532	0.387	0.347	0.336	0.31	1.697		1.457
	2.109	1.228	1.471	1.173	0.985	0.593	0.97	1.098	1.271	0.551	0.272	0.365	3.434		1.328
	1.039	0.332	1.162	1.145	2.356	0.871	1.62	1.181	1.867	0.475	0.449	0.336	2.219		1.755
	1.431	1.259	0.981	0.707	2.337	1.521	1.963	2.202	1.216	0.793	1.372	0.895	1.152		0.93
	1.49	1.278	1.46	1.516	2.091	0.777	1.824	1.174	1.232	0.518	0.626	0.336	1.144		0.775
	0.597	1.004	1.707	1.444	1.662	2.111	2.436	0.742	1.143	0.465	0.645	0.645	1.491		0.696
	1.896	0.785	1.036	0.623	1.29	0.571	1.379	1.122	0.232	0.731	0.585	1.189	1.974		2.06
	1.366	0.975	1.336	1.632	1.841	1.967	0.581	0.868	0.886	0.396	0.518	0.579	1.756		1.647
	1.3	1.003	0.845	1.742	2.176	2.034	0.549	1.068	0.31	0.877	2.272	1.015	1.101		1.14
	1.696	1.553	0.481	1.391	1.028	1.29	1.805	1.307	0.736	0.732	0.136	0.396	1.612		1.482
	1.121	1.297	0.845	1.372	0.93	1.112	0.78	1.069	0.816	0.822	0.539	0.903	0.993		1.05
	1.525	0.822	1.404	1.373	2.326	0.809	1.212	1.806	1.491	2.203	0.31	0.83	1.873		1.813
	1.25	1.306	1.374	0.767	1.87	1.601	1.872	1.464	0.347	0.432	0.347	1.29	1.821		1.169
	1.343	2.639	0.457	1.638	2.698	2.102	2.356	2.002	1.311	2.327	0.327	0.8	1.316		0.42
	1.733	2.988	1.036	1.638	0.616	1.033	0.593	0.822	1.377	0.982	0.31	0.923	1.361		0.394
	1.722	1.37	0.355	1.46	2.715	1.198	1.665	0.97	0.449	0.559	0.944	1.232	2.391		2.76
	1.741	1.241	0.7	1.471	0.816	1.348	2.263	1.454	0.355	0.577	0.424	1.52	1.452		2.239
	1.199	0.725	1.639	1.305	1.995	2.869	2.244	1.02	0.219	1.17	0.817	0.817	0.78		0.955
	1.162	0.996	0.742	1.477	1.66	0.777	1.551	1.128	1.212	0.769	0.304	0.735	0.755		1.113
	1.498	1.932	1.036	1.44	1.484	0.387	1.955	1.258	0.847	2.445	0.861	0.389	0.537		2.297
	1.678	1.853	1.437	1.528	1.341	1.039	1.907	1.347	1.614	1.247	0.473	0.766	0.479		2.135
	1.214	0.981	0.898	0.377	2.611	0.658	0.923	1.517	1.333	2.233	0.37	0.37	0.665		2.237
	1.682	0.704	1.046	1.819	1.959	1.049	2.062	0.949	1.742	0.817	0.219	1.8	1.462		1.261
	1.773	0.616	1.646	1.205	0.822	1.31	0.982	1.161	0.539	1.247	2.171	1.075	2.451		1.33
	1.372	1.631	2.235	1.4	1.44	2.33	1.571	2.186	0.579	0.396	0.385	0.655	1.789		2.561
	1.69	1.084	0.752	1.402	1.959	1.177	1.46	1.807	1.076	2.297	0.503	1.068	1.756		2.556
	1.886	2.064	0.86	1.256	1.553	1.623	2.209	1.753	2.368	0.811	0.262	0.92	1.4		0.832
	1.705	1.596	1.431	1.163	0.987	2.352	1.744	1.642	0.463	0.68	0.347	1.414	1.551		0.606
	1.096	0.504	1.4	1.54	1.05	0.937	1.161	1.327	0.577	1.036	1.291	1.196	1.65		1.101
	1.158	1.378	1.183	0.258	1.457	0.967	1.184	0.797	0.355	0.668	0.731	0.406	0.419		2.089
	0.993	1.29	1.686	1.727	1.799	2.075	1.748	1.065	0.251	0.673	1.116	2.312	0.731		1.732
	1.241	1.942	1.459	1.405	0.816	2.091	1.98	1.11	0.243	0.645	0.439	0.68	0.868		1.548
	1.978	1.52	1.283	1.302	1.803	1.582	1.305	0.678	0.732	0.651	0.907	0.406	0.929		0.645
	1.792	1.279	1.316	1.28	2.397	1.328	1.205	2.206	0.721	0.645	0.946	0.561	0.939		1.614
	0.463	1.387	1.598	0.491	2.116	1.643	2.519	1.307	1.022	0.432	0.406	0.966	2.031		1.719
	1.265	0.42	1.119	0.841	0.785	1.652	1.506	2.825	1.6	0.566	0.651	0.52	1.748		0.664
	1.565	0.981	1.106	0.839	2.271	0.552	1.145	1.29	0.518	0.973	0.907	0.74	1.46		1.119
	0.817	0.876	1.015	1.258	1.418	1.033	1.781	1.553	0.136	0.907	1.216	1.007	2.201		1.33
	0.898	1.516	1.465	1.666	2.157	0.537	1.217	2.472	1.36	0.585	0.43	0.731	0.767		1.288
	1.068	1.4	0.523	1.788	2.456	2.408	0.742	2.036	1.478	0.848	0.406	0.532	0.777		0.923
	1.138	1.764	0.616	0.68	2.165	2.189	0.645	1.441	1.254	0.463	0.585	0.439	0.347		1.047
	1.347	0.88	1.379	1	1.408	1.4	1.848	0.873	0.826	1.343	0.559	0.709	0.808		0.865
	1.679	1.464	1.096	1.948	1.131	0.987	1.012	0.868	0.791	1.319	0.432	0.602	0.936		2.236
	1.31	1.125	0.903	1.419	1.644	1.804	2.832	1.028	0.288	0.822	1.265	0.486	1.225		1.272
	1.35	1.484	1.837	2.259	0.349	1.785	1.225	0.838	0.424	1.35	0.288	0.857	1.174		1.593
	1.205	0.643	0.808	1.516	0.987	1.852	1.784	2.163	0.955	0.639	1.004	0.49	1.368		2.326
	1.231	0.547	1.374	1.284	2.379	0.756	1.254	2.106	0.518	0.355	0.639	0.645	1.737		2.036
	1.35	2.044	1.181	0.981	2.879	2.536	1.987	1.05	0.408	0.993	0.774	1.283	0.967		1.3
	1.445	2.114	1.129	1.01	0.88	1.569	2.167	1.604	1.5	0.219	0.304	0.766	1.968		1.226
	1.52	2.004	1.586	1.356	2.082	0.809	2.775	1.588	0.465	0.389	0.7	0.639	1.241		1.897
	1.033	1.491	0.574	2.065	1.744	0.993	0.841	1.697	1.852	1.247	0.803	0.443	1.989		1.294
	1.849	1.635	1.254	1.504	1.709	1.458	0.935	1.581	0.518	0.656	0.365	0.585	0.714		1.284
	0.604	1.746	1.388	0.665	1.613	1.001	1.112	1.732	0.857	0.215	0.396	0.406	0.809		0.769
	1.401	2.246	1.205	1.571	1.528	0.953	0.94	0.246	0.751	0.443	0.811	0.31	1.267		2.612
	1.6	1.375	1.462		1.627	1.324	0.683	0.826	0.262	1.705	0.761	0.389	1.893		0.972
	1.147	0.698	1.369		1.875	2.04	2.26	1.226	0.693	0.912	0.408	0.611	0.707		1.522
	1.916	1.268	1.563		1.378	1.959	1.693	1.155	0.688	0.443	0.37	0.656	1.503		0.51
	1.548	1.685	1.377		1.65	1.857	0.684	0.42	0.347	0.608	0.408	0.481	0.451		0.851
	0.579	1.8	1.6		1.918	1.313	0.913	1.041	0.923		0.426	0.518	1.919		1.502
	1.98	1.784	1.527		1.811	0.881	1.688	1.936	0.406		1.096	0.49	1.968		1.252
	1.033	2.003	0.406		1.197	1.028	1.752	1.76	0.822		0.389	1.083	0.981		1.039
	0.43	1.252	0.481		1.336	1.204	1.985	2.106	0.943		0.449	0.751	0.525		0.549
	2.075	0.458	0.355		2.463	0.712	1.361	0.665	0.272		0.539	0.639	1.123		1.561
	1.125	0.658	1.379		1.385	0.936	1.888	1.437	0.86		0.439	0.721	1.028		1.905
	1.947	1.512	0.95		2.156	1.278	2.277	2.096	0.251		0.656	0.731	2.038		1.272
	1.211	1.369	0.705		1.644	1.861	1.131	1.056	0.689		0.443	0.811	1.516		1.39
	1.313		1.505		0.755	0.413	1.354	1.097	0.475		0.822	0.886	1.261		0.574
	0.857		1.848		0.592	1.341	2.589	1.564	0.688		1.004	0.602	0.952		2.195
	1.686		1.707		1.789	1.428	2.431	0.838	1.369		0.304	0.599	0.707		2.582
	3.533		2.006		2.356	2.418	1.451	2.038	0.473		0.355	0.655	0.877		1.174
	1.238		0.785		0.987	1.707	1.101	0.377	0.673		0.7	0.551	1.673		2.065
	2.454		1.069		1.428	1.528	1.064	1.665	1.135		1.291	0.301	0.51		1.133
	1.174		1.572		0.791	1.551	1.652	2.634	0.367		0.313	0.449	1.42		1.551
	1.969		1.729		0.779	1.487	2.397	1.768	0.775		0.709	0.752	1.37		2.757
	1.947		1.512			2.553	1.607	1.89			0.432	0.432	2.063		1.205
	1.425		0.686			0.851	0.306	1.189			0.385	0.327	1.04		1.512
	1.982		1.625			2.582	0.806	0.775			0.503	0.457	2.354		1.578
	1.79		1.947			0.501	1.378					0.693	0.29
	1.008		1.558			1.31	1.228					0.288	1.041
	1.569		2.367			1.502	1.189					0.313	1.097
	1.69		1.339			1.284	2.6					1.686
	1.825		1.896			1.372	2.048					0.408
	2.025		0.907			1.457	1.194					0.389
	0.955		1.553			0.563						1.106
	1.851		1.162									0.693
	0.518		0.599									0.62
	1.637		1.211									0.473
	2.115		0.74									0.566
	2.118		0.68									0.551
	1.596		1.241									0.463
	1.637		1.289									0.327
	1.643		1.207									0.396
	2.044		1.705									0.616
	1.48		1.435									0.288
	1.022		1.541									0.344
	1.502		0.751									0.408
	1.096		0.898									0.432
	1.429		1.162									0.347
	1.736		1.55									0.215
	1.857		1.36									1.729
	1.578		0.854									0.52
	1.72		1.065									0.327
	1.831		1.422									0.251
	1.733		0.86									0.501
	1.291		0.989									0.43
	1.4		0.37									0.68
	1.223		1.118									0.669
	1.558		1.825									1.278
	1.23		0.854									0.791
	1.79		0.389									0.544
	2.135		0.645									0.766
	1.278		0.847									0.518
	1.992		1.008									0.336
	1.158		1.022									0.766
	1.316		2.019									0.688
	1.29		0.751									0.551
	2.161		1.008									0.516
	1.319		0.385									0.604
	1.679		0.604									0.481
	1.254		1.296									1.541
	1.575		0.639									0.656
	1.36		1.254									0.31
	1.52		1.48									1.012
	1.3		1.965									0.616
	1.367		0.705									0.551
	1.277		0.955									0.481
	1.158		0.904									0.387
	1.217		0.604									0.561
	1.366		1.654									1.136
	1.733		1.445									0.87
	1.918		1.121									0.97
	0.975		1.308									0.566
	1.078		0.808									0.501
	1.773		2.068									0.49
	0.895		1.35									0.574
	0.721		1.216									0.31
	1.98		1.186									0.789
	1.327		1.6									0.243
	1.565		1.065									0.886
	0.304		1.131									0.635
	1.308		2.03									0.43
	1.36		1.888									0.465
	0.539		0.762									0.355
	2.15		1.214									0.367
	2.076		1.49									0.457
	1.712		2.418									0.215
	1.881		1.389									0.449
	1.271		1.205									0.577
	0.503		1.778									0.243
	1.478		1.371									0.673
	1.316		1.855									0.803
	0.355		2.075									0.518
	0.327		1.575									0.463
	0.955		1.019									0.262
	0.99		1.865									0.432
	2.193		0.854									0.385
	1.377		1.52									1.145
	1.79		0.919									1.393
	1.254		0.92									0.532
	1.36		0.559									0.885
	1.768		1.158									0.626
	1.825		1.565									0.585
	0.551		1.948									0.475
	0.68		2.071									0.532
	0.396		1.174									0.347
	0.122		0.981
	1.27		1.531
	1.406		1.6
	1.054		1.48
	1.296		1.36
	1.637		1.704
	1.515		1.196
	0.871		1.04
	1.829		1.496
	1.849		1.6
	1.339		0.871
	2.068		0.262
	0.585		1.136
	0.8		1.646
	1.291		1.125
	1.377		0.973
	1.52		1.158
	1.096		1.096
	2.152		1.655
	1.385		1.74
	1.252		0.975
	1.429		1.143
	0.396		0.68
	0.845		1.377
	1.036		0.871
	0.406		0.962
	1.248		1.11
	0.762		1.643
	1.135		1.004
	0.551		1.541
	0.74		1.136
	1.192		0.926
	1.48		1.189
	1.445		1.487
	1.598		1.145
	1.183		1.217
	1.558		1.458
	0.693		1.737
	2.458		0.708
	1.338		0.962
	1.123		0.785
	0.62		0.806
	0.491		1.472
	1.673		1.774
	0.957		1.033
	1.825		0.981
	1.425		1.212
	1.227
	1.749
	1.737
	1.582
	1.4
	1.358
	2.203
	1.682
	1.655
	0.761
	1.835
