# Supplementary material for: A stable microtubule bundle formed through an orchestrated multistep process controls quiescence exit
Source: eLife. 2024 Mar 25;12:RP89958. doi: 10.7554/eLife.89958 (PMC10963028; doi:10.7554/eLife.89958)
Supplement: Figure 3—figure supplement 1—source data 3. [file elife-89958-fig3-figsupp1-data3.xlsx]

## Sheet: Feuil1
	+7h		+26h		+50h
	TUb1 intensity	Bim1 Intensity	TUb1 intensity	Bim1 Intensity	TUb1 intensity	Bim1 Intensity
Mean	967.906	1057.12	2696.97	3254.4	2785.97	3313.79
SD	460.512	559.524	1030.39	1695.93	1004.54	2274.69
n=	32	32	30	30	29	29
	871	1513	2676	4248	2206	5963
	342	306	2037	2753	5069	3361
	797	1390	2608	2175	2854	4193
	767	616	2991	1600	1637	4346
	732	1405	2717	5820	1476	5424
	1032	787	1765	4231	4159	646
	678	1011	2212	1738	3153	2801
	2360	1060	3287	1591	3337	4268
	1501	368	2369	5508	1662	8715
	1416	789	2842	1757	1837	2750
	1139	510	2361	2791	3498	2521
	849	777	1869	2854	3828	6832
	1095	1158	2982	7481	2748	6483
	1007	787	2980	3343	2785	2658
	945	776	1705	5022	2778	1055
	891	1019	2649	1669	2967	6372
	1799	1155	2135	2086	2536	1931
	501	2392	2360	3204	5661	2119
	428	1039	2832	1346	2099	1516
	895	1338	2890	6409	1386	1629
	684	1448	5045	2543	1795	3074
	917	1096	3601	2668	2515	449
	998	532	5210	2008	2504	1179
	692	592	3588	1680	3197	2912
	1525	1274	1795	3286	3543	609
	547	1089	3234	3101.93	2629	571
	275	331	4192	3196	1983	720
	1118	1065	2922	4227	2315	6578
	844	478	585	1066	2636	4425
	941	1308	470	6230
	1899	1436
	488	2983
