# Supplementary material for: A stable microtubule bundle formed through an orchestrated multistep process controls quiescence exit
Source: eLife. 2024 Mar 25;12:RP89958. doi: 10.7554/eLife.89958 (PMC10963028; doi:10.7554/eLife.89958)
Supplement: Figure 3—source data 3. [file elife-89958-fig3-data3.xlsx]

## Sheet: Isy83 2d
		ROI 1									ROI 2									ROI 3									ROI 4									ROI 5									ROI 6
								Normalized									Normalized									Normalized									Normalized									Normalized
								TUb1	Sli15								TUb1	Sli15								TUb1	Sli15								TUb1	Sli15								TUb1	Sli15
		TUb1		sli15		TUb1	Sli15	19			TUb1		sli15		TUb1	Sli15	13			TUb1		sli15		TUb1	Sli15	14			TUb1		sli15		TUb1	Sli15	15			TUb1		sli15		TUb1	Sli15	18			TUb1		sli15
length						792.776	1028.56	6.33333							643.649	1403.93	4.33333							299.42	968	4.66667							304.67	716.185	5							1344.49	1136.07	6
0		256.194	220.302	607.926	600.3	71.7844	15.252	0.0905226	0.0148222		407.743	352.611	1472.47	1362.34	110.266	220.264	0.17122	0.156883		145.562	141.42	574.899	654.845	8.284	-159.891	0.0277057	-0.165177		132.004	137.721	684.532	676.295	-11.4332	16.4724	-0.0374859	0.0230061		1644.36	1719.15	2730.67	2779.84	-149.574	0	-0.11129	0		246.553	232.82	514.773
0.129		377.393	305.209	584.422	560.192	144.367	48.4614	0.182052	0.0470956		508.474	470.861	1599.82	1577.36	75.2256	44.9214	0.11681	0.0319953		187.476	166.345	721.054	792.006	42.2626	0	0.141346	0		133.692	160.259	874.289	841.059	-53.1334	66.4608	-0.174208	0.0928223		1922.02	1886.84	3338.99	3364.76	70.3564	0	0.0523485	0		366.839	311.926	671.517
0.258		503.213	406.568	620.167	605.477	193.29	29.3804	0.243746	0.0285524		930.989	711.318	2041.56	1931.71	439.34	219.69	0.682206	0.156475		256.331	205.72	922.681	963.336	101.222	0	0.338536	0		180.301	190.611	977.96	960.938	-20.62	34.045	-0.0676066	0.0475489		1918.22	1868.94	3632.72	3697.26	98.5626	0	0.0733353	0		724.438	551.511	916.424
0.387		863.375	618.222	1074.93	878.76	490.305	392.344	0.618292	0.381287		1217.31	900.092	2404.41	2148.3	634.44	512.211	0.985155	0.364823		467.605	340.389	1152.69	1104.1	254.432	97.1882	0.850942	0.100401		256.734	228.279	1076.62	1011.07	56.9092	131.094	0.186588	0.183092		2041.9	1809.21	3681.05	3512.61	465.382	336.883	0.346266	0.296552		917.402	698.894	995.849
0.516		1066.5	764.868	1239.1	994.296	603.265	489.607	0.760738	0.475809		1283.71	985.516	2257.29	2089.86	596.381	334.868	0.926057	0.23851		573.948	437.577	1285.88	1232.64	272.743	106.483	0.912183	0.110003		369.736	322.659	1396.09	1239.79	94.1554	312.594	0.308706	0.436584		2390.62	1948.83	4059.2	3893.99	883.584	330.412	0.657428	0.290856		1064.71	793.736	1221.91
0.645		1192.15	795.763	1323.48	1038.05	792.776	570.855	0.999717	0.554767		1281.31	996.982	2234.59	2051.58	568.663	366.015	0.883017	0.260694		585.147	449.352	1212.99	1127.11	271.59	171.759	0.908326	0.177437		555.934	441.653	1648.97	1417.68	228.562	462.581	0.749385	0.646063		2712.52	2040.27	4289.11	3998.91	1344.49	580.396	1.00036	0.510912		1060.99	824.939	977.396
0.774		1002.18	687.129	1172.61	999.939	630.093	345.336	0.794569	0.335603		1273.13	951.301	2125.4	1925.48	643.649	399.843	0.999455	0.284789		633.797	516.942	1236.13	1131.55	233.709	209.165	0.781637	0.216079		624.196	471.861	1786.6	1580.07	304.67	413.059	0.998919	0.576899		2665.79	2056.47	4145.73	3858.83	1218.65	573.803	0.906732	0.505108		1068.71	810.115	1044.68
0.903		873.189	598.231	1025.18	887.837	549.916	274.681	0.693463	0.26694		1198.89	883.388	1954.47	1768.33	631.01	372.281	0.979829	0.265157		663.58	520.55	1277.82	1187.38	286.06	180.878	0.956723	0.186857		578.713	466.416	2044.93	1686.84	224.593	716.185	0.736372	1.00026		2495.15	1965.18	3777.4	3748.28	1059.94	58.234	0.788643	0.0512623		1135.55	843.932	1233.39
1.032		762.909	542.358	1109.15	873.779	441.103	470.751	0.556246	0.457484		1006	766.335	1900.24	1795.95	479.322	208.583	0.744289	0.148564		658.921	533.208	1387.43	1141.06	251.426	492.74	0.84089	0.509029		488.904	404.142	1992.41	1674.23	169.526	636.354	0.555822	0.888763		2447.99	1892.7	3727.67	3647	1110.58	161.34	0.826323	0.142024		1048.33	768.176	1144.65
1.161		649.65	477.019	1276.32	991.676	345.262	569.288	0.435387	0.553244		875.623	657.172	2026.66	1769	436.902	515.317	0.67842	0.367035		593.713	444.003	1464.03	1155	299.42	618.063	1.00141	0.638495		507.714	381.31	1874.78	1562.32	252.809	624.93	0.828881	0.872807		2427.04	1843.27	3529.6	3420.07	1167.54	219.062	0.868705	0.192837		1056.31	761.924	1254.82
1.29		522.059	369.62	1272.7	949.615	304.879	646.166	0.384463	0.627955		622.374	490.044	2103.06	1671.85	264.659	862.414	0.410961	0.614255		534.254	415.45	1763.67	1343.37	237.609	840.589	0.79468	0.868377		464.302	347.707	1520.63	1299.8	233.19	441.658	0.764557	0.616841		2468.36	1850.88	4013.86	3609.44	1234.95	808.856	0.918862	0.712021		990.917	737.081	1471.09
1.419		426.991	342.471	1437.5	1027.96	169.039	819.073	0.213164	0.79599		609.836	464.599	2776.73	2074.76	290.474	1403.93	0.451046	0.999952		390.373	340.615	1620.8	1264.5	99.5164	712.618	0.332831	0.736175		462.409	374.3	1470.89	1315.84	176.217	310.096	0.577762	0.433095		2253.21	1707.96	3722.75	3218.47	1090.5	1008.57	0.811385	0.887829		986.36	714.39	1366.8
1.548		284.111	261.109	1539.43	1073.55	46.0032	931.76	0.0580116	0.905501		470.304	408.461	2653.12	2034.8	123.686	1236.64	0.192059	0.880796		328.117	289.875	1731.47	1290	76.4836	882.925	0.255798	0.912112		467.632	372.777	1396.72	1247.49	189.709	298.463	0.621996	0.416848		2068.57	1562.27	3496.09	3149.07	1012.59	694.038	0.753415	0.610949		1021.79	725.865	1834.92
1.677		269.179	226.321	1549.45	1091.72	85.715	915.462	0.10809	0.889661		331.475	312.925	1948.3	1653.45	37.1006	589.708	0.0576096	0.42002		233.49	189.858	1787.86	1303.86	87.264	968	0.291853	1		435.35	353.851	1477.12	1279.79	162.998	394.663	0.53442	0.551205		1891.27	1480.65	3377.25	3069.26	821.224	615.973	0.61103	0.54223		972.959	706.707	1841.09
1.806		288.938	233.994	1599.34	1085.06	109.887	1028.56	0.138572	0.999568		299.568	293.007	1762.86	1602.33	13.1236	321.055	0.0203783	0.228672		203.859	206.307	1616.11	1261.35	1	709.52	0.00334448	0.732975		422.878	319.738	1399.76	1269.14	206.279	261.222	0.676324	0.364836		1642.04	1267.25	3270.31	2885.89	749.57	768.851	0.557716	0.676806		952.556	708.287	1773.84
1.935		248.815	208.353	1112.49	791.2	80.9248	642.576	0.102049	0.624466		218.595	186.907	1771.44	1403.52	63.3756	735.853	0.0984093	0.524112		182.488	188.09	973.512	768.17	1	410.684	0.00334448	0.42426		350.811	295.466	1379.43	1221.25	110.69	316.361	0.362917	0.441844		1221.24	981.096	3128.25	2778.84	480.288	698.818	0.357357	0.615157		916.679	716.823	1813.38
2.064		234.853	192.955	654.965	491.432	83.7954	327.067	0.105669	0.31785		177.741	189.165	1475.22	1362.57	-22.8468	225.295	-0.0354764	0.160466		183.693	187.65	658.341	565.845	1	184.992	0.00334448	0.191107		311.873	275.105	1478.15	1248.34	73.5348	459.615	0.241098	0.64192		983.81	855.048	3337.78	2918.37	257.524	838.821	0.19161	0.738399		782.471	637.953	1650.42
2.193		158.936	125.419	288.134	191.493	67.0326	193.283	0.0845304	0.187836																				212.381	210.115	1345.34	1145.26	4.5328	400.178	0.0148616	0.558907		799.519	736.654	3695.19	3127.16	125.729	1136.07	0.0935482	1.00006		765.25	599.279	1661.19
2.322		114.368	97.0305	202.68	190.817	34.6746	23.7266	0.0437259	0.0230579																				172.213	172.775	942.218	993.817	-1.1258	-103.198	-0.00369115	-0.144132		623.101	574.722	3146.03	2716.4	96.7574	859.264	0.0719921	0.756395		698.106	520.073	1686.83
2.451		89.3017	83.7545	217.08	223.31	11.0944	-12.4612	0.0139904	-0.01211																													536.817	520.769	2765.5	2443.68	32.096	643.639	0.023881	0.566583		635.769	491.923	1945.4
2.58																																						464.626	440.729	2351.97	2161.64	47.7928	380.659	0.0355601	0.335087		723.169	568.843	2130.55
2.709																																															695.015	536.325	2011.74
2.838																																															532.643	467.054	1651.82
2.967																																															532.037	467.775	1581.29
3.096																																															564.38	467.982	1773.85
3.225																																															571.205	472.697	2040.18
3.354																																															523.484	442.255	2039.52
3.483																																															428.735	379.463	1839.53
3.612																																															488.416	410.958	1744.23
3.741																																															385.652	328.095	1478.91
3.87																																															294.54	276.12	1187.57
3.999
4.128
4.257
4.386
4.515
4.644
[truncated: 53 more columns]

## Sheet: realigned
														mTQZ-Tub1															Artificial Q-nMT bundle expansion (blue box) for the one <2µm (16measurements)
	RoI	1	2	3	4	5	7	9	10	12	14	15		MEAn	SD		Realigned toward Tub1 fluo increasing												1.53846		20	16	14	16	20	18	17	13	21	20	20	MEAn	SD
	Mean Tub1 Measured	71.7844	110.266	8.284	0	-149.574	21.3156	3.3342	89.021	1.917	3.925	100.233		23.6824	72.1381		71.7844	110.266	8.284	0	70.3564	21.3156	46.253	2.3	2.8478	-6.1074	100.233		17		71.7844	110.266	8.284	0	70.3564	21.3156	46.253	2.3	2.8478	-6.1074	100.233	38.8666	39.8079
		144.367	75.2256	42.2626	0	70.3564	63.4396	42.2722	2.3	0	0.1886	53.9712		44.9439	44.4377		144.367	75.2256	42.2626	56.9092	98.5626	63.4396	18.642	53.4142	36.1278	114.562	53.9712		0	0	144.367	75.2256	42.2626	56.9092	98.5626	63.4396	18.642	53.4142	36.1278	114.562	53.9712	63.1237	42.3099
		193.29	439.34	101.222	0	98.5626	176.909	46.253	53.4142	2.8478	-40.4058	189.757		114.654	134.044		193.29	439.34	101.222	94.1554	465.382	176.909	139.064	237.841	132.462	356.035	189.757		1.53846	1	193.29	439.34	101.222	94.1554	465.382	176.909	139.064		132.462	356.035	189.757	208.056	156.523
		490.305	634.44	254.432	56.9092	465.382	210.903	18.642	237.841	36.1278	-6.1074	272.087		242.815	213.469		490.305	634.44	254.432	228.562	883.584	210.903	270.411	327.854	169.155	602.284	272.087			2	490.305				883.584	210.903	270.411	237.841	169.155	602.284	272.087	348.73	282.732
		603.265	596.381	272.743	94.1554	883.584	287.936	139.064	327.854	132.462	114.562	383.561		348.688	251.73		603.265	596.381	272.743	304.67	1344.49	287.936	233.047	434.368	231.577	825.475	383.561		3.07692	3	603.265	634.44	254.432	228.562	1344.49	287.936	233.047	327.854	231.577	825.475	383.561	446.47	377.041
		792.776	568.663	271.59	228.562	1344.49	404.159	270.411	434.368	169.155	356.035	330.142		470.032	338.35		792.776	568.663	271.59	224.593	1218.65	404.159	349.235	464.404	275.355	554.801	330.142		4.61538	4	792.776	596.381	272.743	304.67	1218.65	404.159	349.235		275.355	554.801	330.142	463.901	337.885
		630.093	643.649	233.709	304.67	1218.65	291.051	233.047	464.404	231.577	602.284	328.067		471.018	297.002		630.093	643.649	233.709	169.526	1059.94	291.051	331.525	468.462	272.041	560.646	328.067			5	630.093	568.663		224.593	1059.94	291.051	331.525	434.368	272.041	560.646	328.067	427.817	288.547
		549.916	631.01	286.06	224.593	1059.94	274.587	349.235	468.462	275.355	825.475	356.588		481.929	265.087		549.916	631.01	286.06	252.809	1110.58	274.587	431.758	386.482	339.454	614.282	356.588		6.15385	6	549.916	643.649	271.59	169.526	1110.58	274.587	431.758	464.404	339.454	614.282	356.588	436.028	293.513
		441.103	479.322	251.426	169.526	1110.58	224.744	331.525	386.482	272.041	554.801	354.569		416.011	257.539		441.103	479.322	251.426	233.19	1167.54	224.744	386.425	327.778	305.227	567.41	354.569		7.69231	7	441.103		233.709		1167.54	224.744	386.425		305.227	567.41	354.569	409.747	346.121
		345.262	436.902	299.42	252.809	1167.54	246.63	431.758	327.778	339.454	560.646	291.758		427.269	262.3		345.262	436.902	299.42	176.217	1234.95	246.63	555.941	269.327	339.201	602.582	291.758			8	345.262	631.01		252.809	1234.95	246.63	555.941	468.462	339.201	602.582	291.758	452.419	329.848
		304.879	264.659	237.609	233.19	1234.95	252.541	386.425	269.327	305.227	614.282	211.976		392.279	301.215		304.879	264.659	237.609	189.709	1090.5	252.541	313.46	172.66	220.677	619.023	211.976		9.23077	9	304.879	479.322	286.06	233.19	1090.5	252.541	313.46	386.482	220.677	619.023	211.976	367.259	281.345
		169.039	290.474	99.5164	176.217	1090.5	186.757	555.941	172.66	339.201	567.41	242.185		353.628	289.3		169.039	290.474	99.5164	162.998	1012.59	186.757	341.154	98.7716	221.454	515.73	242.185		10.7692	10	169.039	436.902	251.426	176.217	1012.59	186.757	341.154		221.454	515.73	242.185	323.95	279.357
		46.0032	123.686	76.4836	189.709	1012.59	287.893	313.46	98.7716	220.677	602.582	272.718		294.961	283.662		46.0032	123.686	76.4836	206.279	821.224	287.893	365.533	41.7526	196.275	496.385	272.718		12.3077	11	46.0032	264.659	299.42	189.709	821.224	287.893	365.533	327.778	196.275	496.385	272.718	298.217	220.83
		85.715	37.1006	87.264	162.998	821.224	241.386	341.154	41.7526	221.454	619.023	188.038		258.828	249.878		85.715	37.1006	87.264	110.69	749.57	241.386	283.84		139.452	399.54	188.038			12	85.715				749.57	241.386	283.84	269.327	139.452	399.54	188.038	263.208	228.44
		109.887	13.1236	1	206.279	749.57	223.434	365.533	1	196.275	515.73	147.923		229.978	233.407		109.887	13.1236		73.5348	480.288	223.434	223.031		88.7948	196.054	147.923		13.8462	13	109.887	290.474	237.609	162.998	480.288	223.434	223.031		88.7948	196.054	147.923	197.59	127.373
		80.9248	63.3756	1	110.69	480.288	231.193	283.84	44.0706	139.452	496.385	156.569		189.799	168.39		80.9248	63.3756		4.5328	257.524	231.193	243.248		160.106	163.112	156.569		15.3846	14	80.9248	123.686	99.5164	206.279	257.524	231.193	243.248	172.66	160.106	163.112	156.569	159.068	75.0745
		83.7954	-22.8468	1	73.5348	257.524	96.0826	223.031	1	88.7948	399.54	84.1014		116.869	127.513		83.7954				125.729	96.0826	116.326		119.364	157.821	84.1014			15	83.7954	37.1006		110.69	125.729	96.0826	116.326	98.7716	119.364	157.821	84.1014	94.9801	42.2522
		67.0326			4.5328	125.729	93.9702	243.248	1	160.106	196.054	67.516		106.577	82.7084		67.0326				96.7574	93.9702			122.159	108.194	67.516		16.9231	16	67.0326	13.1236	76.4836	73.5348	96.7574	93.9702			122.159	108.194	67.516	73.4771	37.9636
		34.6746			0	96.7574	0	116.326	1	119.364	163.112	50.3686		64.6224	61.1378		34.6746				32.096				178.557	173.997	50.3686		18.4615	17	34.6746		87.264		32.096			41.7526	178.557	173.997	50.3686	76.9637	68.7734
		11.0944				32.096				122.159	157.821	50		74.6341	62.5147		11.0944				47.7928				97.382	23.6458	50		20	18	11.0944	63.3756		4.5328	47.7928				97.382	23.6458	50	39.4779	33.4566
						47.7928				178.557	108.194	102.169		109.178	53.6398										15.3976					19									15.3976			17.1988	2.54728
										97.382	173.997	39.5928		103.657	67.4215														21.5385													#DIV/0!	#DIV/0!
										15.3976	23.6458	42.6156		27.2197	13.9565														23.0769													#DIV/0!	#DIV/0!
										43.532		0		21.766	30.7818														24.6154													#DIV/0!	#DIV/0!
												33.819		33.819	#DIV/0!														26.1538													#DIV/0!	#DIV/0!
																										0
														Sli15-GFP						16.4724			117.05		0	0
	RoI	1	2	3	4	5	7	9	10	12	14	15		MEAn	SD					66.4608	0		0	141.959	0	0			Expansion according to the one applied for Tub1
	According Mean Sli15 Measured	15.252	220.264	0	16.4724	0	0	117.05	141.959	0	0	76.411		53.4008	75.7258		15.252	220.264	0	34.045	0	0	0	32.1848	0	0	76.411				15.252	220.264	0	34.045	0	0	0	32.1848	0	0	76.411	34.3779	68.1818
		48.4614	44.9214	0	66.4608	0	0	0	32.1848	0	0	0		17.4571	25.4304		48.4614	44.9214	0	131.094		0	197.504	267.138	110.793	12.2076	0				48.4614	44.9214	0	131.094		0	197.504	267.138	110.793	12.2076	0	81.212	94.2502
		29.3804	219.69	0	34.045		287.944	0	267.138	0	0	60.928		89.9126	118.991		29.3804	219.69	0	312.594	336.883	287.944	476.399	237.121	235.514	214.282	60.928				29.3804	219.69	0	312.594	336.883	287.944	476.399		235.514	214.282	60.928	217.362	148.175
		392.344	512.211	97.1882	131.094	336.883	285.96	197.504	237.121	110.793	0	203		227.645	147.262		392.344	512.211	97.1882	462.581	330.412	285.96	440.061	213.792	149.242	53.2744	203				392.344				330.412	285.96	440.061	237.121	149.242	53.2744	203	261.427	135.663
		489.607	334.868	106.483	312.594	330.412	83.31	476.399	213.792	235.514	12.2076	327.656		265.713	153.629		489.607	334.868	106.483	413.059	580.396	83.31	456.399	367.959	344.398	381.522	327.656				489.607	512.211	97.1882	462.581	580.396	83.31	456.399	213.792	344.398	381.522	327.656	359.006	175.126
		570.855	366.015	171.759	462.581	580.396	444.984	440.061	367.959	149.242	214.282	294.556		369.335	148.896		570.855	366.015	171.759	716.185	573.803	444.984	618.651	349.127	582.099	92.7566	294.556				570.855	334.868	106.483	413.059	573.803	444.984	618.651		582.099	92.7566	294.556	403.211	201.634
		345.336	399.843	209.165	413.059	573.803	330.76	456.399	349.127	344.398	53.2744	233.487		337.15	137.089		345.336	399.843	209.165	636.354	58.234	330.76	384.02	513.412	542.509	102.442	233.487				345.336	366.015		716.185	58.234	330.76	384.02	367.959	542.509	102.442	233.487	344.695	199.764
		274.681	372.281	180.878	716.185	58.234	141.034	618.651	513.412	582.099	381.522	376.399		383.216	209.752		274.681	372.281	180.878	624.93	161.34	141.034	284.396	598.434	211.934	266.359	376.399				274.681	399.843	171.759	636.354	161.34	141.034	284.396	349.127	211.934	266.359	376.399	297.566	147.259
		470.751	208.583	492.74	636.354	161.34	-204.214	384.02	598.434	542.509	92.7566	152.77		321.459	259.952		470.751	208.583	492.74	441.658	219.062	-204.214	251.678	564.121	234.295	128.039	152.77				470.751		209.165		219.062		251.678		234.295	128.039	152.77	237.966	115.284
		569.288	515.317	618.063	624.93	219.062	217.225	284.396	564.121	211.934	102.442	107.405		366.744	210.69		569.288	515.317	618.063	310.096	808.856	217.225	929.521	545.422	353.669	630.078	107.405				569.288	372.281		624.93	808.856	217.225	929.521	513.412	353.669	630.078	107.405	512.667	225.032
		646.166	862.414	840.589	441.658	808.856	285.577	251.678	545.422	234.295	266.359	156.197		485.383	268.001		646.166	862.414	840.589	298.463	1008.57	285.577	948.374	694.432	611.041	795.586	156.197				646.166	208.583	180.878	441.658	1008.57	285.577	948.374	598.434	611.041	795.586	156.197	534.643	293.265
		819.073	1403.93	712.618	310.096	1008.57	119.38	929.521	694.432	353.669	128.039	393.475		624.801	403.208		819.073	1403.93	712.618	394.663	694.038	119.38	1433.28	992.503	762.652	735.905	393.475				819.073	515.317	492.74	310.096	694.038	119.38	1433.28		762.652	735.905	393.475	627.596	371.479
		931.76	1236.64	882.925	298.463	694.038	237.74	948.374	992.503	611.041	630.078	379.809		713.034	317.932		931.76	1236.64	882.925	261.222	615.973	237.74	863.894	995.558	608.37	639.076	379.809				931.76	862.414	618.063	298.463	615.973	237.74	863.894	564.121	608.37	639.076	379.809	601.789	228.141
		915.462	589.708	968	394.663	615.973	752.548	1433.28	995.558	762.652	795.586	376.488		781.811	300.436		915.462	589.708	968	316.361	768.851	752.548	720.347	864.352	229.817	964.557	376.488				915.462				768.851	752.548	720.347	545.422	229.817	964.557	376.488	659.187	248.091
		1028.56	321.055	709.52	261.222	768.851	913.406	863.894	864.352	608.37	735.905	420.978		681.464	251.412		1028.56	321.055	709.52	459.615	698.818	913.406	907.61	923.006	293.873	745.711	420.978				1028.56	1403.93	840.589	394.663	698.818	913.406	907.61		293.873	745.711	420.978	764.814	331.026
		642.576	735.853	410.684	316.361	698.818	643.905	720.347	923.006	229.817	639.076	275.424		566.897	223.367		642.576	735.853	410.684	400.178	838.821	643.905	924.657	744.407	294.828	682.777	275.424				642.576	1236.64	712.618	261.222	838.821	643.905	924.657	694.432	294.828	682.777	275.424	655.263	283.017
		327.067	225.295	184.992	459.615	838.821	308.157	907.61	744.407	293.873	964.557	229.953		498.577	302.476		327.067	225.295	184.992		1136.07	308.157	196.542	466.381	510.938	183.182	229.953				327.067	589.708	882.925	316.361	1136.07	308.157	196.542	992.503	510.938	183.182	229.953	515.764	345.634
		193.283			400.178	1136.07	135.306	924.657	466.381	294.828	745.711	296.805		510.357	347.469		193.283				859.264	135.306		115.788	589.43	424.839	296.805				193.283	321.055	968	459.615	859.264	135.306			589.43	424.839	296.805	471.955	298.129
		23.7266			-103.198	859.264	-386.664	196.542	115.788	510.938	682.777	283.043		242.468	392.003		23.7266				643.639				468.45	267.801	283.043				23.7266		709.52		643.639			995.558	468.45	267.801	283.043	484.534	343.479
		0				643.639				589.43	183.182	167.429		316.736	283.584		0				380.659				170.732	266.012	167.429				0	735.853	410.684	400.178	380.659			864.352	170.732	266.012	167.429	377.322	282.672
						380.659				468.45	424.839	288.962		390.728	76.7288										113.927							225.295	184.992					923.006	113.927			361.805	376.956
										170.732	267.801	65.3088		167.947	101.275
										113.927	266.012	83.3368		154.425	97.8396
										165.084		21.468		93.276	101.552
												109.905		109.905	#DIV/0!
