# Supplementary material for: A stable microtubule bundle formed through an orchestrated multistep process controls quiescence exit
Source: eLife. 2024 Mar 25;12:RP89958. doi: 10.7554/eLife.89958 (PMC10963028; doi:10.7554/eLife.89958)
Supplement: Figure 3—source data 4. [file elife-89958-fig3-data4.xlsx]

## Sheet: Feuil1
		TReated nocodazole											Treasted DMSO
	4d	WT				bim1delta		bir1delta		bir1 bim1delta			WT			bim1 delta	bir1delta		bir1 bim1delta
	Mean	1.32907	1.4455	1.54254	1.40128	1.29741	1.59049	1.01992	1.11857	0.646759	0.813364		1.44957	1.54269	1.43648	1.49904	1.30963	1.34998	1.29741	1.59049
	SD	0.465209	0.50324	0.519892	0.496202	0.515676	0.563895	0.427481	0.524473	0.368663	0.44361		0.521302	0.59087	0.506045	0.535746	0.516329	0.609696	0.515676	0.563895
	n=	138	320	189	342	145	108	122	233	216	214		477	175	269	370	134	244	145	108
	T-test -+ Noc	0.000243256	nd	0.998011	0.389699	0.2141	nd	1.67139e-06	1.07202e-05	4.41625e-07	0.00515295		nd	nd	nd	#DIV/0!	nd	nd	nd	nd									manip II sli15
	T-test strain	nd	nd	nd	nd	0.587641	0.0250952	4.93166e-19	1.40216e-10	8.43351e-58	1.7753e-40		nd	nd	nd	0.0850463	0.00026389	0.0827899	9.10007e-20	1.01558e-17									manip III sli15
		Data1	Data2	Data3	Data4	Data1	Data2	Data3	Data4	Data3	Data4		Data1	Data3	Data4	Data1	Data3	Data4	Data3	Data4
		1.852	1.132	1.46	1.35	1.284	2.155	0.56	1.869	0.25	1.6		1.326	2.02	2.059	2	2.89	1.128	3.2	1.1									manip IV bir
		1.853	0.95	1.32	1.935	1.045	1.832	1.31	0.848	0.57	0.31		1.161	1.06	0.731	1.2	1.51	1.425	0.86	1.09									manip II bir
		1.4	1.184	2.06	1.721	1.601	2.02	1.33	1.414	0.85	0.31		1.041	1.54	2.197	0.716	1.39	1.496	0.86	1
		1.795	1.06	1.4	1.334	1.551	0.528	0.71	1.026	0.41	0.31		0.608	1.54	2.281	0.716	2.18	1.936	0.47	0.58
		2.129	0.705	0.92	1.247	1.458	0.528	0.71	1.181	0.41	0.31		1.737	1.88	2.408	1.041	0.89	0.877	1.52	0.44
		1.14	0.705	2.32	1.409	0.959	1.475	0.71	1.376	1.1	0.82		1.764	0.7	2.138	2.19	0.89	0.877	1.12	1.29
		1.466	1.635	2.06	1.181	1.744	0.845	1.22	0.93	0.52	0.82		0.584	1.49	1.789	2.34	0.79	0.877	1.12	0.98
		1.908	1.774	2.55	1.91	0.698	0.973	1.59	0.408	0.52	1.22		2.253	1.35	1.639	1.604	0.77	0.877	1.89	1.26
		2.176	1.833	0.85	1.372	0.714	0.973	0.65	0.408	0.67	1.22		1.683	1.42	1.646	1.813	0.38	0.47	0.5	0.16
		1.422	1.679	0.85	1.778	1.327	2.462	1.11	0.928	0.52	1.17		1.516	2.23	0.944	1.19	1.25	1.518	0.5	0.96
		1.935	1.591	1.46	1.158	0.52	1.29	1.06	1.521	0.47	1.01		1.536	1.12	2.1	1.596	1.99	1.154	0.5	0.42
		1.4	1.032	2.02	1.158	1.712	1.834	0.81	1.036	1.12	1.06		1.431	0.44	2.581	2.064	0.99	4.061	0.5	0.8
		1.962	1.704	1.44	1.896	1.396	2.371	2.33	1.977	0.52	0.41		1.415	0.79	0.8	1.169	1.88	1.33	1.39	1.5
		2.02	1.154	2.14	1.131	1.154	1.9	0.35	1.379	0.52	0.41		1.761	2.05	1.824	2.264	1.25	1.163	1.16	1.55
		1.431	1.066	0.46	1.642	1.651	1.933	1.01	1.771	0.66	0.31		1.948	1.37	1.291	0.602	0.61	1.163	3.41	1.27
		1.607	1.569	1.72	2.024	1.792	2.103	1.03	1.796	0.4	0.31		1.644	1.37	2.128	1.87	0.61	1.549	0.41	1.19
		0.966	1.704	1.28	1.888	0.664	2.42	0.82	1.867	0.4	0.31		1.082	1.51	2.039	2.372	0.61	1.474	0.41	1.14
		0.456	1.836	1.28	2.008	1.879	2.05	1.12	1.404	0.4	1.12		2.079	0.71	1.918	2.122	1.08	1.836	1.48	1.32
		0.854	1.599	1.53	0.845	0.439	1.675	0.43	0.525	0.4	1.25		1.825	0.71	1.94	2.013	1.54	1.296	0.87	1.01
		1.784	1.694	1.69	1.978	1.745	2.521	0.43	0.525	0.4	0.89		0.761	1.25	2.037	1.791	0.69	0.612	1.63	1.01
		1.621	2.421	1.12	1.52	0.456	2.198	0.62	1.42	0.4	0.99		1.172	1.56	1.429	2.456	0.69	1.697	1.31	1.41
		0.769	1.299	1.15	1.174	0.456	1.927	0.84	0.943	0.4	1.06		1.091	1.25	1.04	0.924	0.66	0.721	1.51	1.45
		0.871	2.147	0.77	1.765	1.879	2.122	0.77	1.885	1.67	0.79		0.493	1.45	0.716	1.743	1	1.241	0.55	0.92
		1.158	0.668	0.97	2.098	1.942	1.56	0.83	1.125	0.38	0.91		1.239	1.64	1.52	2.421	1.06	1.241	0.55	0.84
		1.501	1.824	0.76	1.742	1.163	1.807	0.78	1.102	0.38	0.73		1.763	1.14	1.075	2.058	1.16	2.239	0.62	0.84
		1.635	1.337	0.76	1.811	1.76	1.898	0.91	0.895	0.38	0.29		2.163	1.6	1.143	1.114	1.57	0.777	0.62	1.19
		0.581	1.6	0.76	1.27	1.328	1.125	0.47	0.811	0.38	0.29		2.135	1.71	0.731	1	1.32	1.489	0.79	0.96
		1.463	0.598	1.99	0.83	1.757	1.017	1.19	1.301	0.92	0.29		1.918	1.69	1.892	1	1.17	1.102	0.82	0.58
		1.161	1.42	2.13	0.481	0.985	1.299	0.6	0.602	0.73	0.29		1.276	2.37	1.718	1	1.5	1.597	0.78	0.58
		1.564	1.255	1.58	0.481	0.767	2.542	1.31	0.547	0.46	0.83		1.973	1.26	1.805	1.593	0.8	1.533	0.78	0.38
		1.084	0.83	1.32	1.192	0.767	2.273	1.02	1.635	0.46	1.78		1.866	1.62	0.966	1.977	1.42	0.841	0.78	0.38
		1.186	1.652	1.32	1.623	0.962	1.989	1.12	0.975	0.46	0.61		1.591	1.02	2.135	0.983	1.42	0.939	1	0.38
		1.457	1.791	1.32	1.259	0.424	0.679	1.27	1.247	0.73	1.08		2.122	0.85	1.328	0.983	1.23	1.875	1.35	1.95
		1.691	1.334	1.32	1.064	2.129	2.097	0.62	0.602	0.95	0.83		1.676	0.85	2.454	0.649	0.55	1.277	1.22	1.47
		1.804	1.67	1.66	1.72	1.833	1.772	1.34	0.602	0.52	1.57		1.662	0.85	1.382	1.528	1.51	2.27	0.58	0.97
		1.194	0.87	2.31	1.278	2.213	1.316	0.75	0.602	0.52	1.46		1.632	0.72	2.058	1.878	1.39	1.553	1.17	1.11
		1.373	1.605	1.48	1.278	1.4	2.278	2.34	0.847	0.52	0.34		1.872	1.43	1.085	1.373	1.53	0.481	1.1	0.94
		1.152	1.024	1.1	0.518	0.798	0.353	0.68	0.775	0.52	0.34		2.161	1.62	1.085	1.229	2.38	0.481	1.2	0.45
		0.826	1.569	1.46	0.463	0.798	1.134	1.04	0.775	0.52	0.34		0.94	1.33	1.23	1.432	1.65	0.481	1.1	1.32
		1.511	1.68	1.68	0.463	0.634	2.035	0.92	1.065	0.56	1.33		0.94	1.87	1.308	1.717	0.85	1.623	1.1	1.57
		1.19	0.897	2.17	0.547	1.69	0.749	1.14	1.925	1.11	2.64		1.719	2.24	1.062	1.419	0.85	1.283	0.58	1.3
		2.068	0.897	1.82	1.135	0.822	1.024	0.55	1.311	0.34	0.77		1.785	2.06	0.981	1.4	1.81	2.616	0.65	1.55
		1.369	1.844	2.33	2.021	2.176	0.53	0.55	0.481	0.34	0.41		1.372	1.48	0.981	2.401	1.43	2.939	0.65	0.92
		1.54	1.181	0.93	0.693	1.002	2.158	1.61	0.481	1.54	0.41		1.775	2.31	1.677	1.976	1.22	0.997	0.91	1.21
		1.646	1.413	2.24	1.502	1.861	1.777	1.14	0.481	0.35	0.41		2.378	2.19	1.806	1.834	1.24	0.997	0.91	0.31
		0.827	1.03	1.85	1.211	1.228	1.346	1.87	2.157	0.35	0.47		2.037	0.69	1.648	1.95	1.79	0.854	1.43	0.31
		1.369	1.065	2.01	0.907	2.156	1.514	0.85	0.736	0.99	1.93		1.347	0.69	1.712	1.627	1.59	1.527	1.5	0.31
		0.392	1.589	0.66	1.256	1.132	1.732	0.85	1.278	0.5	1.21		1.843	2.49	0.731	0.777	0.75	0.835	1.07	0.58
		0.392	1.415	1.77	1.478	1.296	2.212	1.64	2.048	0.5	1.47		2.106	1.5	0.731	0.777	0.75	1.333	1.01	1.32
		1.69	1.296	1.17	1.162	1.039	1.038	0.92	1.125	0.58	0.85		1.511	1.71	1.101	1.506	0.89	1.022	0.85	1.46
		1.612	1.377	2.18	0.808	0.707	0.692	0.92	0.501	0.92	0.85		1.613	1.67	1.682	2.193	2.69	1.527	0.83	0.77
		0.355	1.35	1.73	0.808	0.707	1.645	0.49	1.491	0.61	0.79		1.674	1.53	1.923	2.236	1.97	1.046	0.71	0.41
		1.197	1.024	2.07	1.181	0.707	1.493	0.49	1.022	0.79	0.72		0.913	1.68	1.849	1.656	2.07	1.538	0.61	0.41
		0.785	1.292	1.14	0.457	0.707	0.607	1.16	1.596	0.3	0.43		0.913	1.21	1.757	0.662	1.5	1.849	0.97	0.76
		1.948	1.642	1	0.457	1.876	1.92	0.86	1.819	1.1	0.43		0.913	1.35	1.904	0.662	1.04	1.982	0.49	1.2
		1.718	2.423	2.16	1.596	1.126	1.391	2.18	1.559	0.52	0.38		2.318	0.5	1.019	1.618	0.7	3.442	1.41	0.61
		1.422	1.206	2.02	2.034	1.503	0.901	1.38	0.481	0.37	0.38		1.792	1.83	0.689	2.255	1.23	1.162	0.82	0.78
		1.351	1.749	1.95	1.036	1.333	1.647	1.25	0.751	0.37	0.38		1.706	1.17	0.689	2.196	2.58	1.162	0.72	1.96
		1.326	0.902	0.68	1.04	1.388	1.594	1.49	1.157	0.37	0.38		1.082	2.26	0.689	1.214	2.22	1.289	0.72	1.21
		1.645	2.052	1.54	0.608	1.141	3.174	1.04	1.502	0.37	1.46		1.082	2.02	1.704	1.214	2.36	1.068	0.72	0.92
		1.205	1.312	1.9	0.608	1.256	1.44	1.04	1.346	0.52	0.38		1.503	1.84	2.016	2.132	1.03	2.375	0.72	1.55
		0.952	0.545	1.64	0.608	1.082	1.44	1.48	1.346	1.2	0.38		1.743	1.29	1.409	0.88	0.96	0.919	1.21	1.16
		1.707	1.719	1.47	1.064	0.736	2.454	1.68	1.118	0.87	0.46		0.848	1.59	1.525	1.499	1.03	0.854	0.5	1.23
		0.376	1.901	0.63	1.857	1.411	1.677	1.39	2.157	0.57	1.29		2.214	2.2	1.181	2.126	1.34	1.861	0.63	1.47
		1.409	1.459	1.7	1.98	1.779	1.385	1.26	0.439	0.57	0.94		1.659	1.28	0.914	2.301	1.04	1.768	0.83	1.28
		1.607	1.752	0.83	1.524	2.802	1.603	1	1.04	0.95	0.77		1.084	1.63	0.914	1.703	1.71	0.822	1.72	1.16
		0.736	1.92	1.23	1.369	2.025	1.174	1.48	0.566	0.34	0.39		1.084	0.6	1.947	0.798	1.87	0.822	0.67	0.46
		1.074	0.84	1.68	2.039	0.913	1.746	0.91	0.886	0.34	1.22		1.103	2.62	1.026	0.798	0.95	0.736	1.15	0.46
		1.378	0.933	1.52	1.125	0.913	1.059	1.16	0.981	0.34	1.72		0.785	0.91	1.339	1.119	1.65	1.67	1.74	0.48
		1.391	1.296	2.05	1.385	1.864	1.67	1.02	1.498	2.22	1.58		1.372	0.91	1.372	1.428	1.23	2.886	2.81	0.48
		1.318	1.083	1.34	1.789	0.816	0.808	1.02	1.271	1.37	1.71		0.904	2.16	1.896	1.428	1.35	1.739	0.47	0.48
		0.388	1.189	1.92	1.022	0.816	0.883	1.02	0.919	0.41	0.63		1.692	2.06	0.99	1.768	2.27	1.199	1.01	0.46
		2.082	1.417	1.57	2.001	1.484	1.274	0.73	0.559	0.41	0.63		1.871	1.09	1.619	1.642	0.99	0.608	0.44	3.29
		1.4	1.248	2.06	1.659	1.871	2.362	0.79	0.559	0.41	1.45		0.735	1.57	1.596	1.183	1.37	1.393	0.7	1.36
		0.419	1.746	1.4	1.325	1.677	1.544	2.18	0.886	0.41	0.5		1.757	1.43	2.084	1.102	1.77	3.291	0.7	1.01
		0.725	1.131	1.4	0.847	1.962	2.501	0.56	1.096	0.41	0.5		2.082	2.03	2.24	1.3	1.17	1.379	0.43	0.97
		1.254	1.095	1.26	1.873	1.823	2.204	0.56	0.689	0.97	1.14		0.606	3.08	1.873	0.892	1.37	0.503	0.6	1.41
		1.35	1.927	2.2	1.483	1.714	2.016	0.56	0.939	0.64	0.79		0.606	2.29	1.807	0.892	1.37	0.503	0.6	0.61
		1.71	1.332	1.56	0.886	1.714	1.358	0.56	0.775	0.74	0.79		0.606	0.95	1.635	0.716	1.01	1.418	0.6	1.57
		1.221	1.545	1.42	1.442	1.71	1.965	0.79	0.501	0.83	1.29		1.627	1.39	1.496	1.962	1.85	1.992	0.53	0.82
		0.976	1.664	2.44	1.746	1.165	1.742	0.52	1.563	0.3	0.38		2.448	1.65	0.861	2.541	1.37	1.058	0.44	1.19
		2.39	1.632	1.38	1.814	1.145	1.607	0.52	0.947	0.3	0.76		1.501	1.12	2.019	2.001	1.86	1.135	0.56	1.07
		0.458	1.118	2.19	1.712	1.316	1.684	1.22	1.429	0.3	0.35		1.632	1.72	0.817	1.948	1.02	1.125	0.56	0.43
		1.48	1.545	1.72	1.465	1.968	2.433	1.46	1.796	0.63	0.35		1.916	1.57	1.102	1.082	1.57	1.718	1.04	1.22
		1.48	0.68	1.28	1.72	1.905	1.335	0.8	1.041	1.22	0.35		0.966	1.83	0.944	1.061	1.4	0.672	1.16	0.64
		1.129	1.409	0.48	1.181	2.167	1.749	1.34	0.501	0.63	0.35		0.966	0.57	0.944	1.806	1.82	0.672	0.49	1.62
		0.451	0.59	0.48	1.632	0.448	1.701	0.93	0.818	0.74	1.08		2.108	0.57	0.693	1.102	2.32	1.058	0.64	0.55
		1.284	1.79	1.12	1.995	0.725	1.944	1.4	0.818	1.95	0.85		1.446	1.6	1.965	0.877	1.25	0.731	0.52	0.82
		1.313	1.72	1.12	1.376	1.666	0.933	0.77	0.712	0.45	0.85		1.803	2.02	1.648	1.373	1.13	1.283	0.81	0.5
		2.042	1.544	1.49	1.17	2.323	0.933	0.77	0.779	0.42	0.85		1.761	1.9	1.31	0.871	1.51	1.276	0.62	0.5
		1.92	1.314	2.55	1.985	1.676	2.088	0.75	0.693	0.35	1.16		1.129	1.28	1.422	0.871	1.58	1.211	0.62	0.5
		1.144	2.068	2.1	1.062	2.02	0.82	0.83	1.311	0.6	1.06		1.129	1.13	1.419	1.749	0.91	1.075	0.62	0.75
		1.356	0.975	1.88	2.276	2.1	0.763	1.36	0.926	0.79	0.89		2.376	1.79	1.925	2.458	1.59	1.265	0.35	0.83
		0.939	1.268	1.1	1.525	0.51	1.6	1.29	1.459	0.44	0.89		0.765	1.84	1.677	1.966	2.33	1.207	0.35	1.28
		1.69	1.048	1.03	1.541	1.743	1.568	1.28	1.254	0.58	1.08		0.765	1.46	2.118	2.102	0.52	1.768	0.35	0.3
		1.672	1.689	1.95	2.08	1.114	1.229	0.56	1.14	0.58	0.31		0.765	1.55	1.135	1.736	0.52	1.829	0.35	0.3
		1.355	1.58	0.8	0.751	0.777	1.343	0.3	0.616	0.97	0.31		1.742	2.41	2.04	1.724	0.52	2.051	0.35	0.3
		1.872	0.57	1.66	0.751	1.417	1.783	1.07	1.591	0.77	0.62		2.381	0.57	0.732	1.71	0.76	0.817	1.81	0.79
		0.767	1.965	1.32	1.372	1.549	1.516	1.07	2.044	1.27	0.62		2.295	0.57	1.231	1.92	1.72	0.817	1.5	0.56
		0.767	1.704	1.99	0.818	2.019	2.157	0.98	0.774	1.04	0.62		1.411	0.57	2.266	2.487	1.91	0.689	0.73	0.56
		1.612	1.429	1.49	0.732	0.458	1.81	1.06	1.773	0.56	0.6		1.411	2.08	2.385	1.992	0.78	0.689	0.95	1.41
		0.777	0.358	1.72	1.686	0.465	2.512	1.29	1.49	0.56	1.21		1.861	1.65	2.445	1.482	0.57	0.962	1.81	2.45
		0.826	2.229	2.18	1.731	0.852	1.697	1	1.301	0.56	0.52		1.004	1.52	1.189	1.913	0.57	1.116	1.81	0.48
		1.816	1.517	1.55	1.635	1.066	1.135	1.04	1.502	0.73	1.31		2.532	1.98	0.947	1.416	1.26	1.52	0.82	1.52
		1.432	1.389	1.62	1.733	1.746	0.879	1.42	0.389	1.1	0.8		1.56	2.03	1.223	1.261	1.39	0.982	0.82	0.47
		1.771	1.206	1.79	1.717	1.072	0.879	0.49	2.001	0.73	1.03		1.252	0.49	1.806	1.144	1.31		0.35	0.58
		2.337	1.092	1.89	1.596	0.827	0.997	1.12		1.39	1.13		1.385	0.49	1.856	1.389	0.95	1.189	0.35	1.89
		1.516	1.326	2.28	1.733	1.152	1.92	0.38	0.43	1.08	1.24		1.566	0.49	0.835	1.933	1.16	2.339	0.35	0.77
		2.073	1.087	1.53	1.963	1.197		0.69	0.43	0.47	0.34		0.73	0.98	1.138	2.072	1.06	0.658	1.85	1.57
		1.702	2.247	2.24	1.721	1.245		0.69	0.43	0.47	0.34		1.627	1.53	1.696	2.072	2.02	0.658	0.93	0.95
		1.417	2.319	2.37	1.119	1.784		1.2	0.579	0.46	0.34		1.265	2.59	1.432	1.48	1.73	1.054	0.93	1.23
		1.355	2.01	2.01	2.349	1.029		0.62	1.367	0.3	0.94		1.757	2.07	2.064	1.417	1.99	1.485	0.92	0.3
		1.575	1.855	1.66	1.515	1.073		1.44	2.128	0.3	0.78		1.714	2.13	2.04	1.564	1.53	1.25	1.21	1.01
		1.024	0.901	1.85	1.333	1.095		0.93	1.442	0.3	1.39		1.212	1.7	1.278	0.787	1.69	1.11	1.12	0.81
		1.742	0.901	2.07	1.765	1.848		0.71	1.291	0.3	1.23		1.228	1.75	1.943	0.787	0.99	0.751	1.05	1.24
		2.273	2.021	1.98	1.019	0.97		1.66	1.291	0.4	1.16		1.55	2.37	1.712	1.332	0.85	0.993	0.44	1.1
		0.678	2.159	2.64	0.449	1.025		2.04	1.637	0.4	1.27		0.68	0.52	1.965	2.325	1.5	0.912	0.44	0.59
		0.678	1.409	2.29	0.449	0.652		1.77	2.253	0.4	0.95		1.623	0.52	1.308	1.217	0.91	1.36	0.43	0.9
		0.678	0.59	1.91	1.273	0.652		0.58	1.205	1.77	1.35		2.29	1.79	1.29	2.001	1.81	2.615	0.43	0.56
		0.439	1.775	1.81	1.442	1.013		0.76	1.008	0.82	0.6		1.511	1.21	1.319	1.442	1.3	0.975	0.82	0.51
		1.097	2.393	2.61	2.021	1.529		1.63	0.577	0.35	1.24		1.168	2.3	1.733	2.04	0.97	1.809	0.64	0.52
		1.061	1.849	1.84	0.566	1.546		0.41	1.004	0.35	0.43		1.168	1.26	1.739	2.337	1.03	2.312	0.52	2.13
		1.125	0.8	0.3	1.673	1.72			0.539	0.35	0.43		1.039	1.26	0.847	2.387	0.48	0.769	1.32	1.76
		0.923	0.8	1.75	2.037	0.826			1.174	0.35	0.43		1.717	2.17	2.039	1.628	0.55	0.769	0.49	0.69
		1.216	2.044	1.26	0.616	0.826			1.198	0.35	0.43		2.459	1.77	1.675	1.145	1.24	1.511	0.49	0.97
		0.97	2.176	1.56	1.619	0.785			0.791	0.82	0.43		2.058	2.12	2.485	1.145	0.85	1.92	0.49	0.84
		1.136	1.475	1.53	2.037	0.785			0.49	0.56	0.43		1.542	1.9	1.754	1.785	0.67	2.308	0.49	1.12
		1.209	1.382	1.69	1.873	1.226			0.608	0.56	0.43		1.789	2.21	2.338	1.797	1.59	2.135	0.49	1.08
		1.724	1.869	1.53	0.73	0.88			0.52	2.36	0.86		2.18	0.71	1.385	0.765	1.45	2.406	1.45	0.63
		1.228	2.541	1.62	0.705	0.376			0.947	0.87	1.41		0.812	0.71	1.652	0.765	1.77	1.25	1.77	0.97
		1.183	2.462	1.67	2.19	2.063			1.062	0.44	1		0.812	0.83	1.965	2.062	1.55	1.033	1.55	1.57
		1.444	2.409	2.11	1.769	1.378			0.49	0.72	0.35		1.278	2.38	1.682	1.816	1.68	1.033	1.68	0.3
		0.841	1.904	1.08	2.054	2.091			0.885	1	0.35		1.97	0.89	0.822	1.372	0.94	1.047	0.94	0.3
		1.877	0.889	0.68	1.904	1.644			0.864	0.85	0.97		0.593	1.79	1.778	2.246	0.68	0.518	0.68	1.35
		1.746	1.406	0.85	1.675	1.984			2.028	0.9	1.51		1.827	1.81	1.623	1.971		1.054		1.44
		1.484	1.361	1.55	1.162	0.731			1.252	0.58	1.03		1.797	2.15	1.569	1.62		0.651		0.67
		1.375	1.729	1.64	1.498	0.731			0.92	0.58	1.3		2.176	1.46	1.308	1.872		2.695		0.32
		0.865	0.93	1.38	1.064	0.677			0.426	0.58	0.56		1.803	2.04	0.481	2.181		1.729		0.9
			0.93	2.2	1.605	0.677			0.426	0.58	0.56		1.356	1.46	2.216	1.613		1.961
			1.914	1.31	2.854	1.557			1.068	0.58	1.33		1.616	1.63	1.551	1.472		1.78
			2.202	1.36	0.616	1.839			0.585	0.58	0.43		1.643	2.27	1.768	1.955		0.673
			2.08	1.36	0.301	1.385			1.216	1.13	0.87		1.995	2.08	1.961	3.09		1.334
			2.536	1.3	1.451	1.56			0.871	0.83	1.85		1.494	2.24	1.869	0.696		1.502
			0.666	1.86	1.815	1.385			2.154	1.05	1.22		2.337	1.65	1.054	0.696		2.281
			2.201	0.47	2.214	1.2			1.943	1.05	1.45		2.006	2.82	1.054	1.306		1.138
			1.344	0.81	1.168				0.882	1.06	0.56		1.918	2.11	1.238	1.614		1.198
			1.344	0.66	1.67				0.882	0.67	0.71		0.996	0.71	1.718	2.049		0.709
			2.31	0.66	0.886				0.559	0.67	0.26		1.843	0.71	1.496	2.068		0.709
			0.977	0.66	0.886				1.186	0.83	0.26		1.612	0.71	2.016	1.559		0.904
			0.928	0.94	1.847				0.939	0.71	0.26		1.774	0.71	2.195	1.753		1.66
			0.928	1.17	2.028				1.47	0.93	1.54		1.621	0.9	1.605	1.464		1.673
			1.498	1.75	0.432				1.217	0.54	0.46		1.621	1.81	1.35	2.073		1.026
			2.046	2.09	0.432				0.857	0.54	0.46		1.474	0.99	2.623	1.938		0.732
			2.073	1.34	0.432				0.577	0.35	0.89		1.484	2.2	1.755	2.165		0.735
			1.99	0.86	1.682				1.445	0.35	1.35		1.387	2.04	1.313	2.227		1.965
			1.918	1.12	1.344				1.377	0.35	0.33		1.623	1.31	1.04	1.193		2.408
			1.909	1.37	1.867				0.532	1	0.87		1.298	1.18	1.161	1.049		1.654
			1.243	1.18	0.847				1.328	0.6	1.44		2.345	1.18	0.845	1.51		1.67
			1.918	1.43	0.847				1.25	0.4	0.8		1.746	1.18	1.693	2.011		1.554
			1.147	2.39	0.928				2.683	0.38	0.8		1.265	1.69	1.081	2.645		1.637
			1.389	1.52	1.635				1.032	0.38	0.94		1.369	2.1	0.824	1.239		1.815
			1.544	2.5	1.207				1.271	0.48	0.46		2.031	2.72	1.418	1.239		2.332
			1.447	1.66	0.822				2.279	0.35	0.46		1.908	1.62	1.141	1.373		1.49
			1.344	2.39	1.425				1.248	0.35	0.99		1.974	2.1	1.219	0.913		0.86
				2.05	1.763				0.835	0.35	0.83		1.885	1.21	1.533	0.913		1.334
			2.862	1.59	1.659				1.558	0.35	0.87		2.222	1.21	1.742	1.809		1.575
			1.177	1.53	1.637				1.224	0.77	0.55		1.012	2.02	0.868	1.899		1.692
			0.462	1.93	0.766				0.818	0.6	1.31		1.012	2.77	1.71	1.764		0.92
			1.314	2.2	0.766				0.68	0.5	0.64		1.755	2.37	1.184	2.29		1.158
			2.233	2.22	0.766				1.873	1.22	0.52		1.884	3.03	1.87	2.105		2.138
			1.559	1.86	0.766				1.9	0.3	0.52		1.326	1.75	1.811	1.096		0.816
			0.865	1.28	1.442				0.635	0.3	0.9		1.326	2.17	1.452	2.065		1.692
			1.67	1.28	1.096				1.978	1.12	1.03		1.529	1.59	1.702	1.714		0.826
			1.857	1.86	2.139				1.6	2.58	1.42		0.787	1.59	1.368	2.057		0.559
			0.8	0.49	1.796				1.319	0.48	1.62		0.787	0.89	1.165	1.234		1.347
			0.8	0.98	1.677				0.68	0.64	1.09		1.697		1.724	2.365		1.25
			1.135	2.13	0.803				0.475	0.52	1.09		0.516		0.329	2.174		0.857
			1.053	0.91	1.722				0.475	0.52	0.87		1.612		0.329	0.939		1.621
			1.74	1.34	1.646				0.885	0.39	0.44		1.298		0.329	0.939		2.316
			0.616	1.18	0.886				1.256	0.56	0.44		0.929		1.88	1.676		1.782
			0.616	1.59	1.199				0.716	0.42	0.7		0.886		1.774	1.809		1.336
			2.113	0.87	1.55				1.377	0.34	0.7		1.919		1.327	1.388		0.864
			1.689	1.4	1.984				1.17	1.36	0.82		1.511		1.499	1.669		1.849
			2.284	1.67	0.914				0.835	0.39	1		0.707		1.69	1.669		1.432
			0.659	1.35	1.661				0.835	0.97	0.6		0.707		1.413	1.999		1.039
			0.659	1.55	3.054				0.579	1.03	1.05		1.234		2.226	1.875		0.503
			1.633	0.87	2.124				0.579	0.31	1.45		1.731		1.582	2.229		0.503
			0.916	0.95	1.591				0.579	0.31	1.89		1.734		1.847	2.298		1.157
			1.303	2.52	1.504				0.579	0.31	0.31		1.676		1.255	2.41		0.912
			1.472		1.619				1.186	0.53	0.31		1.506		1.717	1.406		1.582
			1.032		1.212				1.143	0.55	0.31		1.739		0.635	1.46		1.797
			0.79		1.096				1.119	0.85	0.31		1.496		0.953	1.932		1.679
			0.967		1.91				1.985	0.63	0.31		2.122		1.313	2.157		1.625
			1.319		0.608				1.646	0.63	0.31		1.245		1.025	1.599		1.686
			0.784		0.608				0.532	0.75	0.99		1.729		1.888	1.501		1.849
			1.767		1.918				0.532	0.75	1.03		1.214		1.103	1.823		0.585
			1.619		1.395				2.084	0.49	1.1		1.929		1.413	1.424		0.585
			2.306		1.837				1.367	0.49	0.69		1.438		1.683	2.084		0.668
			1.328		1.49				1.371	0.86	0.85		1.252		1.088			1.254
			2.534		0.914				1.72	0.29	0.4		1.448		0.574	1.845		1.468
			1.326		1.515				1.51	0.29	0.4		1.487		2.152	1.621		2.086
			1.62		1.625				0.793	0.49	1.24		1.452		2.102	0.851		0.559
			1.299		1.054				0.539	0.46	0.75		2.246		0.955	0.851		0.793
			2.242		1.054				0.539	1.36	0.47		1.546		1.583	1.697		1.637
			2.052		1.782				0.539	0.97	0.47		1.503		1.496	1.371		0.87
			1.765		2.195				1.3	0.34	0.66		1.571		0.838	1.864		0.525
			1.917		2.081				3.983	0.34	1.1		0.774		1.409	1.496		0.525
			1.414		0.73				1.927	0.77	0.24		2.374		0.634	2.178		1.692
			1.731		1.162				0.639	0.42	1.53		1.008		0.634	1.169		1.198
			1.337		1.218				1.212	0.42	2.23		2.216		1.647	1.408		0.86
			1.473		1.867				1.829	0.42	0.57		2.528		1.183	0.955		1.861
			1.777		1.414				1.17	0.42	0.36		1.862		1.426	1.46		0.689
			1		1.95				0.904	0.42	0.36		2.068		1.491	2.521		0.689
			1.012		2.025				0.904	0.9	0.36		2.316		0.52	1.305		1.371
			1.967		0.742				0.742	0.69			1.533		1.646	1.665		1.089
			1.024		1.435				0.904	0.98			1.688		1.065	1.252		1.782
			1.174		1.462				1.612				1.114		1.169	1.252		2.374
			1.457		1.807				1.222				1.982		2.144	1.252		1.496
			0.838		1.961				0.518				2.051		1.963	1.734		1.496
			1.889		0.443				0.646				0.521		1.4	0.589		2.328
			1.316		1.395				0.646				1.065		1.987	0.589		2.451
			1.923		0.68				0.646				1.396		0.775	1.683		0.86
			1.605		1.55				1.42				1.187		1.361	1.261		0.672
			0.85		1.591				0.762				1.887		0.404	1.947		0.481
			1.64		2.111				0.762				1.392		0.404	2.037		1.811
			0.57		1.773				1.216				1.181		0.404	1.697		0.848
			1.933		0.811				1.088				0.716		0.404	1.633		0.635
			1.748		0.811				0.99				0.716		1.817	1.962		1.054
			1.5		1.696				2.589				1.449		1.576	2.019		2.003
			1.421		1.733				0.944				1.322		2.318	1.938		0.7
			1.335		1.985				0.944				1.673		0.905	0.89		1.25
			1.918		1.945				1.616				0.852		0.844	0.89		0.7
			0.992		1.558				1.593				1.415		0.844	1.5		1.943
			1.763		0.585				1.224				1.369		1.338	1.56		2.553
			1.805		0.585								1.379		1.672	1.805		2.044
			1.451		0.585								1.228		1.819	1.714		0.501
			1.101		2.214								1.851		0.877	1.259		1.211
			2.344		0.561								2.308		1.04	1.119		2.803
			2.534		1.374								2.201		1.688	1.306		1.096
			1.279		1.635								1.341		1.408	2.29		1.889
			1.118		1.033								2.016		0.695	0.686		1.607
			1.711		1.755								1.033		0.97	0.686		1.05
			1.998		1.157								2.186		1.601	0.917		2.014
			1.12		1.916								1.494		1.3	2.161		2.058
			1.484		0.525								0.787		1.607	1.068		0.779
			2.135		0.525								1.104		1.298	1.068
			2.207		1.471								1.323		1.029	1.524
			0.774		1.809								2.36		0.975	1.236
			0.774		1.954								1.183		1.665	1.847
			1.812		1.697								1.542		1.04	0.349
			1.807		1.961								1.336		0.809	1.298
			0.932		1.205								1.358		1.592	1.078
			1.361		1.162								2.467		1.356	1.356
			1.516		1.892								1.521		1.904	0.721
			0.826		1.659								1.457		0.865	0.721
			2.144		1.012								1.183		0.865	1.471
			1.21		1.531								1.367		1.964	0.847
			0.838		1.558								1.904		1.607	1.054
			0.98		1.623								1.503		0.684	1.612
			1.397		1.678								1.359		2.096	0.775
			2.18		1.909								1.485		1.655	1.799
			1.127		2.341								0.394		0.479	0.793
			1.779		2.26								0.958		0.479	0.793
			0.719		0.912								1.556		1.665	1.163
			1.478		1.764								1.551		1.833	0.917
			1.76		1.885								2.203		1.723	1.272
			0.705		2.235								2.418		0.908	0.324
			0.705		1.704								1.542		0.748	0.877
			1.704		1.548								1.945		0.635	0.877
			1.72		1.186								1.674			0.877
			1.038		1.502								0.806			1.781
			0.737		0.847								1.805			1.919
			1.087		1.129								1.347			0.419
			0.847		1.183								1.557			1.672
			1.181		1.205								1.348			0.923
			0.792		0.769								1.346			2.229
			1.337		0.95								2.484			1.018
			1.609		1.847								1.032			1.072
			0.59		2.176								1.646			2.129
			1.79		1.085								0.765			1.757
			1.344		1.982								1.336			1.995
			0.898		2.068								2.4			2.08
			0.898		1.741								0.753			1.744
			0.773		2.135								0.725			1.662
			0.921		1.682								1.692			1.739
			0.921		0.73								2.181			1.923
			0.869		1.155								1.702			1.612
			1.691		0.943								1.449			1.388
			2.313		0.943								0.592			1.799
			1.35		2.021								2.451			2.295
			1.079		1.106								0.935			1.785
			1.367		1.231								0.935			1.56
			1.136		2.04								1.873			1.677
			1.103		0.585								2.24			1.246
			2.476		1.11								1.942			0.716
			1.934		1.831								0.838			1.685
			0.358		0.912								0.838			0.748
			1.686		1.116								1.592			0.917
			1		1.963								1.797			0.917
			1.965		1.463								2.04			1.797
			2.082		1.247								2.152			1.789
			1.813		1.254								1.359			1.354
			0.421		1.52								1.37			0.972
			2.115		1.661								2.259			0.972
			1.29		1.27								1.973			0.592
			1.417		1.121								1.588			0.592
			2.22		1.205								1.084			2.032
			1.045		1.703								1.391			1.605
			1.045		1.746								2.386			1.145
			1.274		1.078								2.242			1.438
			1.852		1.121											1.409
			2.034		1.336								3.12			2.08
			0.905		1.72								0.368			1.917
			2.08		1.216								1.613			2.114
			1.518		1.642								1.442			1.838
			2.105		1.344								0.479			2.613
			2.313		1.118								2.683			2.281
			2.082		1.468								1.784			1.329
			1.85		0.585								2.961			0.387
			0.935		0.585								1.214			0.387
			0.607		0.689								1.829			0.47
					1.248								2.96			1.97
					1.118								2.459			1.088
					1.308								1.843			1.805
					1.498								1.549			1.714
					1.806								0.865			1.703
					1.174								0.865			1.644
					1.635								1.405			0.665
					1.605								0.816			1.442
					1.541								0.816			1.866
					2.016								1.532			1.288
					1.857								1.58			1.432
					1.637								1.691			1.575
					1.471								0.827			2.335
					1.259								0.827			2.153
					1.982								0.827			1.259
					1.846								0.439			1.259
					1.741								2.093			2.013
					2.064								0.88			0.785
					1.078								1.245			1.546
					0.525								1.859			0.979
					1.48								0.484			1.417
													0.484			0.937
													1.369			0.306
													1.163			0.306
													0.838			1.392
													0.419			1.551
													0.419			2.639
													1.714			0.51
													1.717			0.501
													2.21			1.169
													1.451			2.058
													1.866			1.775
													2.227			1.914
													1.467			1.154
													1.101			0.266
													0.912			1.62
													2.138			1.432
													1.551			1.46
													1.256			1.446
													0.742			2.076
													0.742			0.968
													0.448			0.968
													1.03			0.968
													1.126			0.549
													1.963			0.742
													1.966			1.355
													1.405			1.413
													1.148			1.306
													1.583			1.38
													0.777			0.424
													1.295
													0.822
													1.273
													1.172
													1.342
													1.717
													1.152
													0.689
													0.937
													1.066
													1.66
													1.561
													0.646
													1.072
													0.753
													0.904
													2.495
													1.69
													1.422
													0.868
													0.868
													0.868
													0.918
													1.714
													1.112
													0.742
													0.742
													1.114
													1.516
													1.2
													0.957
													0.643
													1.05
													0.614
													1.415
													1.073
													1.258
													0.581
													1.71
													1.567
													1.19
													1.385
													1.385
													1.853
													0.479
													1.471
													1.2
													1.318
													1.717
													0.465
													1.635
													1.485
													2.031
													1.397
													1.385
													0.64
													2.664
													1.396
													1.457
													1.731
													1.442
													0.975
													1.224
													2.157
													1.551
													1.707
													1.887
													1.098
													1.098
													1.267
													2.091
													0.71
													0.71
													2.045
													1.31
													1.378
													1.061
													1.186
													2.229
													1.306
													0.484
													0.484
													1.604
													0.955
													0.6
													0.6
													1.549
													1.449
													2.085
													1.356
													1.444
													1.42
													1.37
													1.126
													1.278
													1.742
													1.601
													2.473
													0.361
													1.503
													0.857
													1.605
													0.606
													1.186
													1.039
													0.922
													1.632
