# Supplementary material for: A stable microtubule bundle formed through an orchestrated multistep process controls quiescence exit
Source: eLife. 2024 Mar 25;12:RP89958. doi: 10.7554/eLife.89958 (PMC10963028; doi:10.7554/eLife.89958)
Supplement: Figure 3—source data 5. [file elife-89958-fig3-data5.xlsx]

## Sheet: Feuil1
	Isy53				Isy115				Isy126
	WT		WT +Noc		slk19delta		slk19delta +noc		double slk19 bim1 delta		double slk19 bim1 delta+ noc
n=	292	151	145	206	145	275	137	402	293	180	181	206
Mean	1.51547	1.68885	1.47874	1.58877	1.37186	1.28941	1.00702	1.02633	0.767311	0.913011	0.55074	0.569049
SD	0.621757	0.535976	0.585187	0.56644	0.601539	0.558595	0.424378	0.470191	0.46125	0.52569	0.269174	0.329552
T-test	0.545569	0.0898128	ND	ND	1.06815e-08	3.54658e-10	ND	ND	2.7329e-10	4.76893e-13	ND	ND
	data1	data2	data1	data2	data1	data2	data1	data2	data1	data2	data1	data2
	1.642	2.779	1.646	1.095	1.558	2.572	1.207	1.162	1.731	0.673	0.457	0.355
	2.677	2.155	0.693	0.93	1.154	0.584	1.036	1.867	0.611	1.026	0.457	0.355
	2.383	2.141	0.693	2.1	1.256	0.448	0.599	0.481	0.611	0.616	0.424	0.355
	1.548	2.049	2.332	0.947	1.256	1.696	0.68	0.481	0.611	0.997	0.396	0.426
	1.597	1.704	1.143	1.429	1.867	1.602	1.575	1.277	1.553	0.86	0.396	0.426
	1.128	2.521	1.431	1.129	0.73	1.098	0.752	1.527	0.808	0.712	0.561	0.426
	0.626	2.29	1.145	1.313	1.316	0.999	1.102	0.822	0.808	0.639	0.561	0.457
	2.018	1.973	2.463	1.569	1.878	2.094	1.485	0.761	0.396	2.055	0.539	0.473
	1.358	1.802	1.406	0.975	1.064	0.559	1.311	0.761	1.116	0.37	0.439	0.463
	2.872	1.335	1.66	1.91	1.064	1.375	1.563	0.761	1.116	0.525	0.439	0.463
	1.415	1.028	0.481	1.135	1.064	1.445	1.222	0.761	1.92	1.259	0.473	0.463
	1.186	2.057	0.481	1.451	1.064	0.684	1.078	1.445	2.372	0.775	0.473	0.304
	1.04	1.953	2.142	1.718	2.028	2.511	0.539	0.43	1.878	0.775	0.473	0.304
	0.968	2.233	1.374	0.86	1.55	2.774	0.539	1.387	0.439	1.943	0.473	0.301
	0.968	1.568	1.565	1.819	0.943	1.507	1.218	1.801	0.439	1.621	0.473	0.304
	1.453	1.225	2.835	1.524	1.995	1.04	0.43	1.389	0.993	2.942	0.761	1.064
	1.4	1.346	1.278	0.86	2.032	2.132	0.919	0.975	2.298	0.898	0.599	0.31
	1.012	1.367	1.278	0.851	1.558	0.877	1.325	1.366	0.914	0.275	0.449	0.31
	1.33	2.692	1.385	3.104	1.851	1.122	1.181	1.837	0.86	0.406	0.449	0.432
	1.264	0.89	1.765	0.561	1.135	0.683	0.645	1.625	0.585	0.355	0.501	0.432
	1.163	2.625	1.437	1.308	1.101	0.558	0.645	0.882	0.585	0.367	0.501	0.432
	1.467	1.337	1.948	1.099	2.23	1.998	0.645	1.515	0.585	0.532	0.473	0.288
	1.422	1.205	1.78	1.768	0.742	1.038	1.677	0.561	0.585	0.577	0.473	0.443
	1.619	1.364	1.265	0.689	2.016	1.308	0.93	1.739	1.675	0.658	0.547	0.443
	1.136	1.954	2.135	1.222	1.577	2.581	1.605	1.17	1.393	1.265	0.547	0.645
	1.846	2.27	1.241	1.335	1.819	2.099	1.661	2.598	0.426	1.892	0.432	0.645
	1.224	2.664	1.395	2.058	1.577	1.694	0.791	1.24	0.426	0.882	0.432	0.645
	1.978	1.382	1.628	2.15	2.142	2.217	1.442	1.824	0.626	0.827	0.639	0.769
	2.554	1.496	1.399	1.406	2.414	1.097	1.205	1.344	0.944	0.7	0.639	0.443
	1.995	1.394	1.541	0.904	0.68	1.916	0.981	0.544	2.517	0.791	0.639	0.475
	1.072	0.792	1.881	0.396	0.68	0.912	0.7	0.544	1.385	0.288	0.639	0.251
	2.06	0.973	0.258	1.195	1.969	2.118	0.7	1.008	0.761	0.672	0.645	0.347
	1.739	2.703	1.682	1.429	1.789	1.277	1.308	1.008	0.761	0.721	0.37	0.347
	0.456	3.176	1.217	1.592	1.278	1.902	0.645	0.822	0.761	1.655	0.37	0.347
	1.165	2.114	2.088	2.565	1.411	2.642	1.382	0.903	3.467	0.566	0.37	0.779
	1.214	1.811	1.116	1.367	1.646	1.04	0.789	0.903	0.608	1.089	0.37	0.396
	1.101	1.789	1.763	1.586	1.4	1.435	0.93	1.158	0.608	0.645	0.408	0.396
	1.754	1.216	1.174	2.043	1.855	1.901	0.93	1.483	0.608	0.847	0.52	0.327
	1.462	2.233	1.943	1.857	0.817	1.411	1.765	0.365	1.659	0.449	0.355	0.327
	1.343	1.863	1.746	0.396	0.845	2.169	1.004	0.611	0.712	0.789	0.355	0.336
	0.557	1.854	1.387	1.592	1.648	1.025	0.847	0.611	0.712	0.559	0.355	0.735
	0.547	0.924	1.636	1.643	0.597	2.479	0.898	0.577	0.712	0.87	0.37	1.089
	1.163	2.985	0.789	1.988	0.597	1.291	0.449	1.978	1.857	0.861	0.385	0.465
	1.471	1.557	0.789	1.586	1.673	1.293	0.347	0.465	0.385	1.085	0.559	0.465
	1.53	2.84	0.523	1.217	1.679	1.765	1.003	0.465	0.385	0.785	0.559	1.493
	1.123	1.29	0.523	2.372	0.424	2.253	1.089	1.379	0.882	2.076	0.475	0.389
	2.021	1.248	1.935	1.429	1.565	1.717	0.599	0.585	0.432	0.532	0.43	0.716
	1.496	2.299	1.591	1.704	2.914	2.047	0.599	0.585	0.525	1.755	0.43	0.716
	2.151	1.468	0.847	2.414	0.871	1.641	0.86	1.686	0.525	1.231	0.716	0.608
	1.559	1.018	2.311	0.655	2.135	1.773	0.74	0.327	1.886	1.036	0.424	0.646
	1.261	1.63	0.387	1.102	2.22	1.772	1.05	0.327	0.585	0.95	0.439	0.585
	1.033	1.933	0.387	2.655	1.625	1.531	0.775	1.765	0.864	0.943	0.43	0.347
	2.018	1.19	1.336	1.075	1.247	0.527	0.775	0.639	0.946	0.668	0.525	0.347
	1.347	2.003	1.91	2.024	1.478	1.976	0.775	1.224	0.882	0.993	0.473	0.288
	0.777	2.19	1.982	2.326	2.507	1.481	1.101	0.49	0.882	0.87	0.473	0.37
	1.962	2.695	1.192	0.752	2.279	1.505	1.498	0.49	0.882	1.078	0.473	0.37
	1.816	2.409	1.755	0.752	0.882	1.518	1.065	1.837	1.675	0.693	0.288	0.37
	0.75	1.541	2.907	1.369	1.707	0.9	0.827	1.435	2.084	1.121	0.406	0.982
	0.75	2.095	1.367	1.815	2.086	2.009	0.639	1.308	1.174	1.301	0.544	0.639
	2.169	0.994	1.367	1.945	2.326	1.239	1.471	1.11	0.611	0.68	0.486	2.388
	1.817	1.449	1.55	0.981	1.442	1.076	0.885	0.668	0.611	0.736	0.313	0.396
	2.469	1.375	1.25	0.981	0.518	2.565	1.483	0.639	0.611	1.531	1.008	0.43
	0.871	0.795	1.276	1.198	1.619	1.261	1.158	1.493	0.611	0.501	0.68	0.43
	2.576	1.664	1.945	1.198	1.98	2.371	1.36	1.022	0.611	1.129	0.68	0.396
	0.453	1.729	1.429	1.118	1.773	1.382	2.118	0.443	0.611	2.436	0.68	0.396
	3.219	2.768	0.981	0.886	1.377	2.365	1.401	1.867	1.256	0.835	0.672	0.396
	0.923	2.377	0.981	1.865	0.818	1.815	0.566	0.993	0.68	0.473	0.672	0.396
	1.98	2.448	2.629	1.605	1.712	1.976	1.216	1.211	0.68	0.655	0.854	0.396
	1.444	1.252	1.217	1.308	1.635	0.985	2.059	1.211	0.68	2.277	0.585	0.396
	1.256	2.016	2.421	1.379	0.639	0.593	1.411	1.273	0.68	0.695	0.503	1.35
	2.258	1.024	2.465	0.547	0.639	1.493	1.814	1.6	0.68	1.431	1.565	0.426
	1.739	0.84	1.654	1.794	1.824	1.038	1.083	0.827	0.516	0.655	1.007	0.426
	1.635	2.551	1.952	1.973	1.164	1.115	0.486	0.525	1.199	0.716	0.481	0.426
	2.081	1.268	1.254	1.965	0.347	1.76	1.773	1.962	1.424	0.962	0.43	0.389
	1.638	1.744	0.775	1.283	0.443	1.028	1.296	2.472	1.125	0.952	0.43	0.52
	1.464	1.62	0.775	1.675	2.193	1.051	0.645	1.265	0.525	1.041	0.43	0.52
	1.89	1.86	0.775	2.279	1.174	1.122	0.645	1.48	0.525	0.877	0.385	0.775
	0.755	1.552	2.341	2.214	1.527	1.931	0.645	0.793	2.319	0.473	0.658	0.443
	0.755	1.662	1.198	2.454	0.52	2.414	0.645	1.17	1.471	1.223	0.501	0.561
	1.045	1.749	1.041	1.838	1.885	2.074	0.997	1.717	1.765	1.592	0.561	0.561
	1.045	1.739	1.6	2.154	1.563	2.04	0.559	0.895	0.579	1.52	0.258	0.646
	0.94	1.142	1.904	1.308	1.792	1.059	0.975	1.223	0.579	0.387	0.443	0.646
	1.948	1.438	2.019	2.851	1.327	0.582	1.445	0.275	0.579	1.409	0.73	0.336
	1.516	1.017	0.793	2.076	0.857	1.42	1.512	1.904	0.585	1.008	0.639	0.547
	1.893	1.243	0.793	1.336	1.316	2.059	0.616	0.952	0.585	1.125	0.585	0.396
	0.827	1.67	0.793	0.955	0.947	1.463	0.616	0.406	0.585	0.599	0.516	0.262
	2.108	1.451	1.3	1.771	0.561	1.383	0.616	0.406	1.387	2.135	0.243	1.344
	1.623	1.749	2.624	1.174	0.822	1.415	0.616	0.981	1.481	0.389	0.645	1.429
	1.677	2.136	2.039	1.52	1.062	0.853	1.199	0.822	0.923	0.944	0.818	0.347
	1.779	1.541	1.814	2.149	1.306	1.33	1.254	1.721	0.923	1.596	0.579	0.347
	1.354	1.35	1.058	1.507	0.816	1.779	0.616	1.401	0.923	0.62	0.465	0.658
	1.504	1.878	1.377	1.646	0.579	0.927	0.616	0.861	1.252	0.355	0.43	0.923
	0.329	1.674	1.621	1.652	0.481	1.86	1.463	1.686	1.455	0.481	0.439	0.258
	0.329	1.571	1.096	2.139	2.469	1.199	1.797	0.898	1.637	0.424	0.439	0.62
	0.329	1.587	1.746	1.861	1.55	0.615	0.37	0.898	1.4	0.439	0.288	0.232
	1.703	1.252	2.14	1.94	2.118	1.593	0.37	0.955	0.645	0.432	0.288	0.232
	0.71	1.25	1.527	2.142	2.23	0.688	0.37	1.825	0.645	0.385	0.288	0.387
	1.356	1.795	1.121	1.704	0.779	0.96	0.37	0.585	0.645	0.639	0.731	0.387
	1.784	1.882	1.125	1.733	0.336	1.266	0.37	0.997	0.645	0.288	0.503	0.387
	2.4	2.092	2.46	1.195	1.026	1.734	1.17	0.955	0.7	2.19	0.608	0.611
	1.101	2.921	1.471	2.204	1.796	0.579	0.904	1.099	0.439	2.1	0.481	0.611
	2.871	1.278	0.74	1.596	0.92	0.769	0.904	0.848	0.288	1.367	0.481	0.365
	1.163	1.48	0.74	0.639	1.154	2.617	1.565	0.854	1.485	0.981	0.481	0.473
	1.169	2.419	1.682	0.639	0.882	1.969	0.559	1.442	0.288	1.339	0.785	0.473
	1.197	2.068	1.36	0.639	0.826	1.604	0.943	0.791	1.003	0.473	0.432	0.473
	1.449	1.696	2.034	1.36	0.432	0.86	0.275	0.762	0.387	0.975	0.432	0.473
	1.835	1.999	0.93	2.043	2.159	0.462	0.68	1.91	0.74	0.43	0.544	1.575
	2.222	1.946	2.422	1.17	1.3	0.431	0.766	1.789	0.561	0.975	0.518	0.367
	1.516	0.916	1.809	2.481	1.339	1.892	1.704	1.705	0.688	0.651	0.585	0.367
	0.808	1.477	1.247	2.554	0.732	0.415	0.457	0.547	0.301	0.789	0.347	0.367
	2.355	0.887	0.551	1.643	2.992	1.897	0.301	0.547	0.347	0.463	1.75	1.815
	1.736	1.492	1.35	2.054	1.419	1.355	1.062	1.308	0.406	0.37	0.327	0.439
	1.3	2.104	1.35	1.35	1.343	1.611	1.121	0.816	0.52	0.658	0.645	0.439
	1.4	1.073	1.52	1.78	1.66	0.777	1.541	0.288	1.565	0.559	0.501	0.439
	2.272	1.819	1.52	0.966	1.195	1.616	0.695	1.468	0.669	0.775	0.577	0.49
	1.061	2.068	1.022	0.966	0.344	1.858	1.696	0.947	0.463	0.475	0.408	1.42
	2.812	1.187	1.116	2.196	0.599	1.011	0.655	2.162	1.223	0.886	0.408	0.43
	1.771	1.154	1.525	2.157	1.358	1.449	1.861	0.561	0.424	0.288	0.406	0.43
	0.756	1.319	1.216	1.849	2.414	1.462	0.947	0.639	1.739	0.811	0.721	0.43
	0.756	1.989	2	1.445	1.17	1.773	1.945	0.639	0.827	0.465	0.408	0.43
	1.351	0.98	1.525	2.061	0.895	1.452	0.982	1.034	0.426	0.751	0.408	0.43
	0.665	1.485	0.818	1.712	1.796	1.626	1.106	1.369	0.426	0.518	0.408	1.334
	0.665	2.015	0.818	2.649	1.551	0.895	1.485	1.807	1.418	0.645	0.408	1.334
	1.3	1.646	2.22	1.335	2.114	0.918	0.463	1.35	1.078	0.484	0.579	0.712
	1.322	1.358	2.173	1.096	0.566	1.135	0.463	1.553	1.965	0.949	0.31	0.712
	2.738	2.402	1.79	1.294	0.566	1.625	0.463	0.912	0.424	0.563	0.387	0.523
	1.775	1.948	0.885	1.806	0.566	1.959	0.981	1.047	0.424	0.71	0.37	0.523
	1.656	0.88	0.885	1.05	1.867	1.781	1.17	0.424	0.481	0.361	0.272	0.37
	1.897	0.702	0.885	1.78	0.561	1.122	0.928	1.155	0.481	1.012	0.43	0.327
	1.549	2.267	1.746	2.118	1.31	1.957	0.74	1.012	1.558	0.673	0.43	0.327
	1.53	1.046	2.037	1.116	0.304	0.456	1.691	1.755	1.504	0.684	0.602	0.635
	2.626	0.795	1.637	2.581	1.143	0.86	1.265	1.17	0.501	0.252	2.142	0.635
	1.602	2.338	2.22	1.385	2.339	1.655	1.125	1.231	0.501	1.053	0.503	0.68
	1.514	1.765	0.914	2.352	1.625	1.654	1.23	1.565	0.501	0.456	0.439	0.68
	0.532	1.152	1.67	1.778	1.637	0.47	0.92	0.49	1.569	1.148	0.432	0.396
	1.517	1.5	1.424	1.847	1.379	0.67	1.311	1.918	1.068	1.004	0.503	0.551
	1.112	1.389	1.424	1	2.1	0.745	0.904	0.716	0.385	0.39	0.574	0.822
	1.112	1.211	1.643	1.241	1.623	0.686		0.716	0.385	0.626	0.574	0.408
	1.239	1.087	1.062	1.399	2.176	1.57		1.992	0.668	2.378	0.83	0.408
	0.47	1.306	1.003	0.449	2.23	1.675		2.003	0.668	0.602	0.822	0.408
	1.621	1.832	1.801	0.449	0.561	1.622		0.693	0.668	0.593	1.769	0.385
	1.674	1.356	0.761	1.174	0.561	1.664		0.693	0.668	0.392	0.597	0.385
	1.87	1.608	2.829	2.331	1.158	1.465		2.463	0.886	1.371	0.775	0.385
	2.181	1.647	3.615	1.797	1.565	1.299		1.294	0.8	2.237	0.465	1.062
	1.774	1.538	1.414	2.637	0.716	1.457		0.904	0.539	0.485	0.465	1.694
	1.677	1.791		1.455		2.107		1	0.539	0.355	0.651	0.532
	1.651	1.645		1.036		1.461		2.835	0.539	0.716	0.475	0.574
	0.801	2.17		1.036		1.601		0.626	0.539	0.896	0.475	0.516
	1.442	1.336		1.705		2.023		1.468	2.243	0.662	0.611	0.424
	2.06	0.577		1.809		0.858		1.022	1.424	0.645	0.426	0.68
	1.48	2.12		2.629		1.78		1.022	0.518	0.324	0.732	0.385
				1.101		0.948		1.116	0.579	0.683	0.475	0.385
	1.164			0.947		0.723		1.905	0.785	1.72	0.693	0.385
	0.408			0.947		0.885		1.096	0.785	0.356	0.559	0.585
	0.525			1.339		2.322		1.223	0.503	0.662	0.443	0.585
	1.325			1.498		0.587		0.539	0.389	0.324	0.762	0.762
	1.654			2.15		2.336		0.539	0.389	1.273	0.639	0.43
	1.646			1.801		1.054		1.27	0.389	0.504	0.424	0.43
	2.712			1.248		1.359		1.598	0.389	1.638	0.689	0.43
	2.001			1.794		1.065		0.645	0.465	2.192	0.736	0.313
	2.462			1.089		0.555		1.485	0.465	1.821	0.365	0.313
	1.121			2.603		1.052		1.102	0.465	0.484	0.389	0.313
	1.039			1.655		1.269		1.036	0.465	0.989	0.525	0.465
	2.347			2.339		1.347		0.525	0.465	0.516	0.525	0.712
	1.27			1.54		1.64		0.525	0.465	0.683	0.693	0.518
	1.558			1.465		0.856		1.686	0.465	0.876	0.473	0.656
	2.171			1.807		0.639		0.561	0.811	0.767	0.574	0.656
	1.52			2.384				1.078	0.327	0.51	0.501	1.648
	2.962			2.554		1.785		2.316	0.327	1.123	0.611	1.581
	1.52			1.291		0.595		0.865	0.327	0.68	0.272	0.539
	1.98			1.72		1.154		0.975	0.327	1.655	0.272	0.539
	1.382			2.019		1.259		1.796	0.327	0.297	0.611	0.559
	0.981			1.954		1.316		2.115	0.327	0.537	0.406	0.559
	1.065			1.99		2.271		1.041	0.258	2.077	0.406	0.37
	0.803			2.066		0.767		1.041	0.646	1.756	0.304	0.37
	0.608			1.95		0.752		1.041	0.645	1.688	1.3	0.37
	2.276			2.114		0.71		0.7	0.532	0.68	0.475	0.539
	1.982			1.125		0.73		2.048	0.532	1.633	0.475	0.539
	0.518			1.125		0.394		2.347	0.396	1.056	0.396	0.481
	0.92			3.156		1.488		0.989	0.396	0.821	2.068	0.457
	1.367			0.793		1		1.102	0.396		0.735	0.406
	2.451			1.943		0.504		1.334	0.396			0.406
	1.335			1.635		1.313		1.527	0.396			0.406
	1.121			1.977		1.4		0.751	0.396			0.406
	1.062			2.021		0.62		0.817	0.396			0.406
	2.365			0.732		0.39		0.817	0.396			0.693
	2.203			0.732		0.413		1.442	0.396			0.693
	2.421			2.051		1.295		0.539	0.608			0.7
	2.142			1.145		0.388		1.863	0.845			0.705
	2.693			1.238		0.563		0.673	0.993			0.705
	2.26			1.238		1.003		1.559	0.712			0.914
	2.314			1.796		1.36		1.577	0.518			0.389
	0.793			2.214		0.367		1.154	0.885			0.673
	1.451			2.136		0.395		0.68	0.355			0.751
	1.047			3.298		1.008		1.085	0.775			0.475
	1.935			1.703		1.896		1.328	0.646			0.475
	2.14			2.169		1.451		0.827	0.646			0.475
	1.062			1.463		0.853		1.727	0.646			0.585
	1.755			1.463		1.351		0.668	0.367			0.585
	2.494			0.912		1.206		1.05	0.525			0.551
	0.585			1.189		1.919		0.525	1.455			2.058
	0.585			1.581		2.21		0.944	0.408			0.579
	0.585			1.336		1.509		1.418	0.616			0.655
	0.946			1.007		0.774		2.016	0.262			0.655
	1.223			1.637		1.43		0.886	0.712			0.655
	2.327			1.855		1.982		0.673	0.344			0.655
	2.257					0.569		0.673	0.344
	1.195					1.184		1.283	0.611
	0.882					0.579		0.955	0.611
	1.4					0.881		0.793	0.68
	1.205					1.966		0.981	0.68
	1.642					0.955		0.848	0.626
	1.851					1.058		0.579	0.732
	1.343					0.963		1.805	0.645
	0.886					1.234		0.735	0.365
	1.158					0.531		1.935	0.365
	1.254					1.115		0.177	0.365
	1.328					2.03		1.429	0.599
	1.621					0.735		1.395	0.387
	1.121					0.433		1.265	0.387
	0.396					0.422		1.558	0.387
	2.136					1.507		0.669	1.401
	0.911					1.686		1.701	0.465
	2.243					0.532			0.192
	1.17					1.439		1.667	0.656
	2.757					1.491		1.384	0.432
	1.695					1.262		0.819	1.019
	1.311					2.587		2.089	0.882
	0.424					1.294		1.95	0.732
	1.174					0.9		0.645	0.732
	2.336					0.873		0.728	1.36
	2.408					1.162		0.771	0.645
	1.717					0.931		0.99	0.732
	1.404					1.394		0.539	0.847
	0.785					0.612		0.595	0.716
	1.129					1.247		0.826	2.066
	2.066					1.071		0.623	1.254
	0.304					2.323		0.637	0.645
	1.94					0.523		0.353	0.449
	2.243					0.612		1.386	0.449
	0.817					0.688		1.189	0.616
	0.608					0.633		1.507	0.616
	1.637					1.357		0.692	0.616
	1.593					0.787		0.532	0.616
	2.169					0.722		0.955	0.848
	2.769					0.579		0.532	0.559
	0.847					1.888		0.666	0.822
	1.579					1.005		0.664	0.818
	1.502					0.886		0.581	0.818
	0.551					1.242		0.878	0.818
	1.675					1.17		1.14	0.49
	0.688					1.409		0.885	0.732
	1.129					1.133		1.008	0.668
	1.102					1.422		0.443	0.539
	1.367					1.201		1.25	0.539
	2.191					0.715		1.051	0.656
	2.233					1.465		0.76	0.955
	0.327					1.119		0.65	0.49
	0.597					1.646		0.559	0.408
	0.803					0.777		0.798	0.443
	1.371					0.699		1.213	0.443
	1.829					1.234		0.84	0.443
	2.19					0.24		0.672	0.301
	1.697					0.964		1.442	0.742
	1.885					1		0.517	0.83
	1.773					1.038		1.354	0.808
	2.589					0.731		0.851	0.752
	1.739					0.686		0.895	0.525
	1.52					1.07		1.046	0.602
	1.939					0.731		1.212	0.611
	2.372					1.115		1.473	0.705
	1.824					1.409		0.933	0.903
	2.081					0.803		0.31	0.673
	0.426					1.42		0.896	0.673
	0.672					0.709		1.106	0.742
	1.768					1.184		1.118	0.851
	2.025							1.008	0.732
	1.778							0.608	0.559
	2.193							0.62	0.626
	0.7							0.616	0.501
	0.585							1.034	1.102
	0.672							0.292	0.304
	1.27							1.205	0.304
	2.768							1.707	0.611
	1.931							0.385	0.86
	2.748							0.946	0.457
	2.066							0.668	0.457
	1.174							0.577	0.457
	1.491							0.937	0.457
	2.121							0.616	0.457
	2.537							1.187	0.86
	1.089							0.809	0.611
	2.706							1.553	0.68
								0.752
								0.664
								0.639
								0.221
								1.217
								2.15
								0.791
								1.054
								0.946
								1.493
								1.02
								0.939
								0.695
								1.195
								1.206
								1.265
								1.333
								0.796
								0.865
								0.581
								0.662
								0.805
								0.799
								1.444
								0.487
								0.746
								0.987
								0.994
								1.08
								1.039
								0.472
								0.946
								0.906
								0.881
								0.924
								0.934
								0.881
								0.787
								0.409
								0.775
								0.645
								0.898
								0.734
								0.9
								1.489
								0.945
								0.645
								0.494
								1.096
								1.095
								0.963
								0.578
								0.561
								0.456
								0.366
								0.406
								0.699
								0.739
								0.688
								1.193
								1.151
								1.384
								1.062
								0.808
								0.383
								0.662
								0.99
								1.936
								1.313
								1.088
								1.406
								0.387
								1.115
								1.531
								1.358
								0.507
								1.125
								0.669
								0.435
								0.387
								0.852
								0.761
								0.495
								0.927
								0.654
								0.328
								1.007
								1.803
								0.913
								0.74
								0.702
								0.608
								1.389
								1.076
								0.966
								1.189
								0.845
								0.914
								0.864
								0.262
								0.568
								0.898
								0.52
								0.456
								0.569
								0.388
								0.388
								0.827
								1.31
								0.885
