# Supplementary material for: A stable microtubule bundle formed through an orchestrated multistep process controls quiescence exit
Source: eLife. 2024 Mar 25;12:RP89958. doi: 10.7554/eLife.89958 (PMC10963028; doi:10.7554/eLife.89958)
Supplement: Figure 4—figure supplement 1—source data 1. [file elife-89958-fig4-figsupp1-data1.xlsx]

## Sheet: Feuil1
						kip1delta 4d + noc (individual Q-nMT bundle mesurments)
0	75															76	87		30
0.126	25		4	25	1	54			23							38	95	64	68	36	67		29																					215
0.252	153	30	114	107	133	212			49		149	11	43			39	20	121	139	66	231	138	85																	62				207			109
0.378	224	265	198	340	341	347	207	115	275	202	331	207	162	84	53	248	148	219	305	35	389	353	142			211			223			175						318	194	176			381	239	307		209		365
0.504	529	556	615	873	860	704	557	508	632	934	849	480	524	849	594	561	434	763	598	361	672	666	545	473	576	489	604		425	548	510	627	437			554	347	794	668	417		803	468	275	679	528	642	563	450
0.63	1138	818	1321	1844	1117	1317	1508	1283	1469	1451	1113	1116	1306	1511	1010	633	398	1188	649	1028	1274	1129	1131	877	1156	976	1519	1807	571	1570	1045	1631	796	1360	1986	1205	928	1311	1629	829	1382	1321	241	1022	1398	1207	968	828	736
0.756	1176	852	1557	2171	905	1428	2756	2037	1242	1904	1079	1601	1621	1528	1444	706	320	1381	624	1495	1413	1605	1386	1322	1902	1079	2334	2354	715	2091	1416	2771	995	2431	4077	1699	1558	1349	2077	513	1240	1557	399	985	1203	1620	1627	1674	686
0.882	1135	1007	1679	2119	780	1341	2740	2799	1021	1754	1119	1781	1430	1510	1445	703	472	1233	702	2145	1168	1446	1382	1330	2637	1017	3095	2423	468	1876	1180	3048	525	3295	4034	1862	1630	1477	2113	555	804	1380	398	906	2255	2282	1203	2078	551
1.008	920	955	1942	2124	762	1123	2422	3161	1200	1693	1296	1931	1489	1494	1582	815	470	1116	702	2028	792	1091	1081	1422	2580	964	2300	1772	323	1509	945	2399	178	2739	3360	1289	1541	964	2019	469	732	489	304	862	2320	1038	1078	610	880
1.134	1025	937	1810	1927	904	1105	1885	3150	956	1625	1155	1910	1310	1356	1385	757	467	1270	572	1839	630	976	954	1326	2723	928	1962	2154	481	1182	983	2312	72	1948	2906	1018	1555	1015	1674	382	528	458	94	497	2394	969	1235	694	702
1.26	1003	1009	1856	1771	621	964	1535	3181	933	1506	1090	1675	1066	1286	1261	945	617	1024	427	1901	661	533	1076	937	2191	859	930	1878	294	961	1027	2473	44	1069		1094	1625	614	1598	408		455		494	2066	1120	924	807	662
1.386	872	841	2176	1386	460	863	1150	2536	702	1236	927	1669	964	919	1062	991	635	1036	567	1814	689	690	1111	702	2048	796	675	1537	245	790	945	2540	19	495		957	1679	614	1526	307		275		354	1199	1054	815	844	817
1.512	711	739	1725	1249	227	734	835	1885	744	1218	774	1285	863	631	987	865	533	648	719	1760	625	614	1112	620	1556	687	324	1061	267		763	2396				831	1268	512	1097	249		136		147	676	1033	431	824	778
1.638	463	789	1639	1227	131	506	584	1355	493	890	740	1223	527	656	860	526	592	774	554	1758	628	231	939	602	1047	540		591	88		734	2218				805	745		900	206				146		814	219	773
1.764	365	745	1559	719	6	372	324	742	458	509	724	879	353	657	888	683	447	438	345	1594	666	435	829			469			198		628	1641				706	137		430	242				394		324		745
1.89	199	645	1204	385	6	103		489	224	452	754	794	270	512	590	724	307	220	354	1438	628	402	839						130		429	1292				690			406	185				265		102		753
2.016	78	519	1066	452				399		245	787	733	189	506	529	607	476	293	332	958	586	263	820						148		301					478			232	167								653
2.142		363	908	212				18		294	552	542	111	337	157	639	545	397	254	406	396	60	795						125							281
2.268		267	839							84	418	432		198		658	195	292	189	314	351	86	759													182
2.394		145	759								462	457		178		551	138	83	104	202	408	68	896													91
2.52		96	376								285	582		77		517	23	51	38		388		656
2.646		30	176								78	353				340	117	133	33		320		416
2.772												185				288	153	36	36		178		212
2.898												25						-50	36		228		36
3.024																					72		200
3.15																							146
3.276
										WT4d + noc (individual Q-nMT bundle mesurments)
0	88	139	93		23	90	35			99	33	67	-78					32	114		38	34	96	82	174	242	192	213	172			56	103		182	282	142	183	173	173	62	86	176	245	36	8	106	86
0.126	176	123	182	11	377	347	352	254	132	225	183	66	110	23	213	158	345	247	262	372	238	204	99	113	145	461	314	305	169	225		311	295	154	113	235	211	323	215	141	116	135	419	355	196	248	321	84	80
0.252	896	243	308	302	592	396	904	845	488	368	535	602	594	390	559	341	718	682	409	688	373	414	225	306	427	927	824	678	452	738		674	720	596	366	575	609	561	433	383	591	563	775	541	359	465	480	443	630
0.378	1506	449	438	1018	897	717	1846	1262	1042	857	1038	1069	1591	590	1310	589	890	1277	402	1219	976	832	262	758	779	1159	1794	1316	1162	1334		336	1240	1275	775	704	919	825	998	1163	1229	1384	975	1368	830	857	831	989	1329
0.504	1699	563	246	1395	1090	862	2667	1645	1677	2321	1832	1186	1796	389	1928	517	1117	1859	618	1544	1229	923	191	903	813	968	2197	1912	1071	1393		299	1533	1541	699	688	1365	778	1542	2236	1213	2120	1014	2195	879	1185	848	1692	1666
0.63	1990	409	304	2021	1365	978	2554	1806	1903	3008	1852	1172	2199	589	2155	260	1185	2668	701	1785	1425	931	358	540	751	1263	2056	1636	1225	1166		292	1550	1723	810	712	1724	701	1736	2876	1137	2121	896	2016	1195	1136	760	1887	2187
0.756	1713	370	290	2247	1161	1032	2451	1823	2095	3179	1911	1007	2460	697	2083	457	1142	2830	617	1509	1311	1111	311	328	676	1408	2139	1541	1166	1292		247	1444	1792	786	502	1821	508	1558	3158	1114	2256	786	2228	893	1253	1029	1695	1807
0.882	1992	664	361	2216	1095	828	2817	1918	2324	3536	2059	922	2169	496	1941	419	902	2657	279	1643	994	1116	301	118	469	1757	2175	1387	1039	1385		16	1638	1601	836	546	1930	471	1539	3099	940	2321	772	2206	1153	950	1091	1488	1940
1.008	2279	639	468	2530	1228	600	2450	1717	2342	2901	1660	1182	1886	202	2001	201	780	2592	453	1552	1295	1039	347	196	280	1694	1496	1255	1155	1310		277	1441	1682	633	764	1870	667	1722	3085	1010	1978	801	1945	1121	923	1125	1260	1670
1.134	2080	603	447	2319	1099	521	2027	1341	2115	2762	1604	1297	1944		1905	-56	961	2268	469	1103	1162	1161	441	201	324	1330	1280	1313	662	1113		244	1426	1898	462	493	1841	528	1827	2908	765	2163	721	2226	1254	1015	1105	1201	1648
1.26	2151	508	321	2443	928	547	1920	1396	1734	2569	1449	1066	1374		1742	156	544	2112	428	1172	1067	976	128	115	236	1319	932	1200	489	797		250	1456	1751	565	513	1791	559	1565	2851	692	2240	773	1615	1101	986	1058	1195	1749
1.386	1809	470	412	1934	590	723	1779	1277	1295	2145	1187	875	1137		1411	-115	602	1995	425	1167	1012	1078	105	165	80	1263	428	1119	85	944		134	1311	1500	312	337	1324	316	1481	2882	735	2032	688	1669	1135	1082	1062	1030	1275
1.512	1695	469	333	1854	559	585	1622	1223	752	1923	990	919	1058		1024	-44	228	1527	206	910	580	1050	23	108	47	1059	186	894	-255	1019		132	1222	1464	176	385	1103	391	1413	2216	588	2157	550	1753	783	1061	775	927	1151
1.638	1631	739	277	1904	501	575	1339	1070	446	1420	642	796	1052		633	87	223	1382	257	971	469	809		287	40	712	-38	488	-22	765		7	1008	1281	160	580	1114	246	1638	1790	619	1868	496	1490	851	1232	998	858	892
1.764	1221	386	243	1563	461	490	1281	957	391	551	294	510	972		377	56	177	1055	285	917	118	503		279	70	525	-97	241	-64	656		93	1013	1213	214	425	927	438	1408	1380	653	1645	311	1720	760	1157	868	721	544
1.89	1102	133	289	1479	289	364	1290	463	200	271	22	232	680		91	79	84	934	114	808	17			291	71	334		82	-62	365		65	751	810	131	497	683	209	1114	949	607	1620	420	1584	617	1274	677	596	393
2.016	739	-66	224	1001	115	302	837	306		233		124	176			235		773	18	829	-6			221	60	153		-137	34	316		-6	815	811	-2	468	611	172	936	639	663	1238	434	1442	515	1193	739	463	265
2.142	400		267	903		217	341			202		0	75			44		573		887	37			212	-48	49			-116	216			785	674	-219	435	224	89	1035	420	439	923	283	1405	306	1117	434	260
2.268	178		28	712		82	159			38						-24		191		774				127	-4	101				126			745	490		381	72	183	1099	207	253	667	303	1244	189	761	345	323
2.394	94					-13	4			4										557				120						88			524	502		281	185	273	936	186	227	487	215	1044	-46	703	114	275
2.52	18						206			-26										830				18						-14			376	170		329		186	786	-115	227	405	110	575	-23	562		331
2.646										71										675				-14										57		319		149	695		192	124	63	229	9	529		345
2.772										175										541				58												271		140	324		78	-4	25	57		459		268
2.898																				562				69												6			55		-10	-86		82		168		116
3.024																				576																					41			-25		-31		-10
3.15																				568																										-66
											bim1delta 4d + noc (individual Q-nMT bundle mesurments)
0			114	64		136			25	32					36			174				80				60		2					53
0.126			116	19		268			144	83				246	25		46	77		56		41	61			168	46	5		155		149	51				66					70			58		45	20
0.252	173		265	280	290	222	120	187	308	316	32	77	77	311	55	233	187	88	113	138		204	93		41	241	145	120	111	281		390	196	58	260	105	91	112		156	141	161	42	14	228	136	157	102	124
0.378	556	268	621	327	306	339	279	294	522	679	278	208	265	657	274	559	491	312	374	586	227	521	323	224	227	371	333	232	220	390	128	447	503	247	537	417	166	487	149	329	337	529	265	247	257	211	360	385	325
0.504	840	651	954	449	713	727	432	618	835	990	821	490	734	871	534	918	635	573	842	918	776	766	650	805	782	992	821	408	477	646	483	988	708	738	783	794	789	929	675	687	653	1079	900	703	710	547	858	767	625
0.63	779	1478	1073	586	1788	901	1080	1010	670	1088	928	543	925	1076	464	1128	906	746	1202	1236	1142	795	645	1277	847	1027	1308	487	522	810	1973	1541	831	1492	1084	1098	983	1530	1345	922	1275	1474	1753	1015	1052	1075	1267	1314	1941
0.756	581	2044	1117	725	3919	1221	2022	1398	736	1001	808	530	943	1299	463	1114	1013	804	837	1213	1293	829	509	1334	1230	1221	1077	488	714	991	3179	1713	941	1785	1365	1237	1095	2107	1894	622	1618	1649	1607	1162	1020	1354	1501	1139	3974
0.882	615	2215	1379	608	4447	1442	2488	1537	706	1073	992	862	872	1040	436	940	1155	728	577	1314	1534	700	590	1359	1132	1070	896	684	686	1175	4535	1578	931	1472	1559	1543	989	2228	2626	386	1752	1396	1486	1132	1016	2031	1599	1044	5067
1.008	597	2203	992	501	4267	1509	2927	1704	582	1186	946	609	767	997	422	918	1109	544	176	1334	1762	644	590	956	1300	1290	732	664	647	1003	4449	1535	913	1175	1527	1725	860	2105	2367	401	1556	1012	1298	1168	1126	2028	1794	1107	5515
1.134	441	1659	594	486	3307	1128	3377	1626	327	1084	861	767	747	893	480	851	941	500	193	1255	1616	475	525	943	1652	1106	723	570	579	887	4101	1231	1024	1349	1779	1786	819	2399	2282	352	1215	1092	1252	1193	1142	2001	1722	704	5040
1.26	425	1486	328	481	1907	966	2928	1543	290	1246	776	837	589	706	426	871	950	450	44	1335	1701	370	481	729	1738	1260	583	263	424	934	4400	1127	798	1239	2037	1852	655	2233	1976	265	1193	892	1075	1136	1457	2149	1886	527	5254
1.386	510	1191	220	440	951	600	2730	1424	279	1005	625	706	674	640	525	770	887	314	225	1213	1258	232	443	509	1849	1337	524	121	297	895	3867	1199	523	1007	1642	1757	563	2281	1286	394	1083	446	899	956	1467	1892	2033	418	4322
1.512	359	657	107	458	491	479	2242	1157	170	847	602	743	604	524	421	612	818	193	168	1239	1202	154	313	507	1741	1203	498	45	130	768	3440	1114	406	942	1031	1792	313	1853	986	225	730	572	1001	886	1321	1575	1770	300	4121
1.638	245	306		383	3429	324	1611	1095	57	877	545	584	609	354	329	473	832		95	1122	756		275	413	1588	939	463		12	815	3178	971	186	790	368	1700	376	1673	648	348	523	643	1110	870	1485	865	1565	626	3070
1.764	249	207		389	3115	102	1130	625	69	937	444	530	554	238	337	401	667			765	556		168	377	1160	647	228			690	2115	1193	117	562	160	1688	192	1404	166	239	308	420	859	588	1184	369	1359	570	2776
1.89	151			258	2837		438	255	181	864	258	373	339	145	259	365	598			465	337		34	71	1291	324	219			276	1339	1211	113	410	-10	1239	123	864		224	175	323	689	542	1079	74	1163	714	1652
2.016	140			145	2417			51	51	653	130	188	288		232	317	446			209	133		44	76	1216	230				476	865	924		447		921	102	480		261	29	243	608	402	766	88	1048	507	1103
2.142				86	1976			38		616	82		91		52		235			5	292		43		1035	223					361	823		296		970		250				194	679	325	394	-30	611	442	406
2.268					1461					296	7						60								758							863		215		699		241					581		443		375	581
2.394					832					189	4														416							827		66		454							411		216		296	294
2.52					522					144															228							734		6		362							62				231	96
2.646					244																				237							752		43													145	166
2.772					278																				132							649															158
2.898					124																				117							586
3.024																																533
3.15																																275
3.276																																199
3.402
3.528
[truncated: 64 more columns]
