# Supplementary material for: A stable microtubule bundle formed through an orchestrated multistep process controls quiescence exit
Source: eLife. 2024 Mar 25;12:RP89958. doi: 10.7554/eLife.89958 (PMC10963028; doi:10.7554/eLife.89958)
Supplement: Figure 4—figure supplement 1—source data 2. [file elife-89958-fig4-figsupp1-data2.xlsx]

## Sheet: Feuil1
	+ NOC				- NOC
	WT		cin8delta (Isy143)		WT		cin8delta (Isy143)
	length (µm)	Q-nMT intensity	length (µm)	Q-nMT intensity	length (µm)	Q-nMT intensity	length (µm)	Q-nMT intensity
Mean	1.90725	1392.08	2.03928	949.458	1.8555	1565.22	1.60881	999.332
SD	0.39747	586.952	0.674169	409.842	0.576999	834.47	0.539377	446.289
n=	126	126	64	64	103	103	64	64
T-test	nd	nd	0.152249	9.14609e-09	nd	nd	0.00588002	5.66302e-08
	2.224	1268.48	2.016	1198.67	1.708	1744.76	1.848	1147.69
	1.538	1543.96	2.929	258.205	1.997	1095.4	1.677	843.432
	1.379	745.213	1.776	1016.03	1.259	466.304	1.296	1801.81
	1.218	1061.18	1.659	312.234	1.762	354.499	1.546	613.072
	1.75	1247.92	2.253	1570.08	2.522	1117.26	2.258	827.139
	1.378	744.715	1.726	1775.41	1.943	1140.79	1.378	734.499
	1.061	869.072	2.955	1120.14	3.176	872.354	1.665	1001.18
	1.873	966.259	1.887	665.489	2.156	1614.91	2.131	290.776
	1.424	1053.56	1.425	1048.87	3.92	1910.86	1.759	881.64
	1.377	1238.59	2.304	1109.05	1.817	2749.99	1.602	433.461
	0.974	629.802	1.898	933.516	1.97	2053.37	2.427	882.805
	2.048	844.148	1.826	861.123	1.32	1356.95	2.514	898.88
	1.277	1016.28	2.973	1564.12	1.582	853.244	2.947	469.651
	2.15	714.139	2.971	812.19	1.448	4039.46	1.712	945.579
	1.217	1584.19	2.428	973.696	2.81	1025.28	1.663	1424.03
	1.723	1073.9	2.867	814.706	2.78	1303.32	2.381	1275.44
	1.828	1925.15	1.47	1604.78	2.255	1921.3	1.619	1779.29
	1.625	2030.9	3.751	936.822	2.456	1171.84	2.913	1392.66
	1.448	804.083	2.964	1012.57	2.025	1356.23	2.96	1628.89
	1.712	1587.37	2.91	689.889	2.121	341.879	1.164	603.054
	1.535	611.127	2.246	1063.83	1.648	1884.69	0.713	1761.18
	1.506	709.973	1.629	1475.85	1.782	1339.22	0.995	1448.21
	1.946	750.288	2.487	621.085	2.354	1393.42	1.392	1089.43
	1.907	2883.84	1.172	1608.37	3.413	802.818	1.553	715.474
	1.888	2495.43	1.71	605.456	1.916	2135.87	1.528	1236.9
	1.961	1242.82	1.415	1162.21	1.941	1611.05	1.429	2006.54
	1.826	461.074	1.657	1851.05	1.381	2569.82	1.414	904.1
	2.096	812.754	0.452	371.945	1.897	2096.23	0.63	1193.58
	1.99	1340.11	1.187	1462.16	2.823	1424.78	1.557	1152.74
	1.658	419.26	2.064	542.376	2.648	1219.1	1.089	1558.35
	1.604	1177.81	1.529	606.625	1.453	2537.05	1.247	1464.48
	1.969	1115.54	1.635	1848.62	1.852	1076.13	0.479	2433.13
	2.113	2263.65	1.324	1372.95	0.996	1943.89	1.311	854.142
	2.294	1092.53	1.897	1615.43	2.305	1235	1.295	895.245
	1.858	1188.78	2.159	496.66	2.641	1424.76	1.049	981.379
	1.854	1273.83	2.268	1424.45	2.587	1671.24	0.982	1402.03
	1.908	1489.5	2.306	893.434	1.109	1063.28	1.991	214.786
	2.075	664.99	1.442	1499.18	2.471	469.382	1.46	1090.04
	1.363	1423.23	2.904	523.752	1.464	998.971	1.788	604.335
	1.431	1505.78	1.665	535.521	1.552	463.08	2.011	802.297
	1.806	706.171	2.212	768.071	2.228	937.278	1.12	600.966
	2.1	1380.89	1.395	489.719	2.073	839.8	1.111	733.005
	1.952	867.089	2.686	1037.79	1.357	1184	1.549	708.998
	2.936	1704.51	1.906	828.372	2.319	482.206	2.619	1149.64
	2.386	1994.42	1.962	481.627	2.281	832.178	1.162	147.828
	1.729	1455.52	1.481	777.511	1.527	911.543	1.107	691.834
	1.54	2546.16	1.145	1082.72	1.652	914.668	1.004	610.38
	1.593	1397.76	1.458	868.736	2.629	643.823	1.954	820.423
	2.417	1281.63	2.395	1033.96	2.059	2227.95	1.322	556.959
	1.525	1827.26	1.587	1045.41			2.435	1260.2
	1.474	2490.27	1.801	996.72	1.415	2266.09	1.744	1318.11
	2.741	3085.19	0.961	1329.7	1.398	2681.99	1.518	1173.57
	2.23	727.914	2.965	1021.02	2.09	2462.38	2.235	774.409
	2.294	2826.38	1.951	774.491	1.581	1162.79	1.569	1323.96
	1.209	1523.47	2.442	904.907	1.558	4097.78	1.354	1137.81
	1.145	2287.45	2.545	258.112	1.451	326.894	1.867	214.786
	1.662	1528.51	1.446	634.562	1.883	898.594	1.356	1150.29
	1.198	2258.71	1.365	386.556	1.347	498.883	1.322	800
	1.713	2021.32	1.909	767.929	1.818	749.63	1.151	824.787
	2.075	1629.1	1.833	680.013	1.111	3389.36	1.516	754.04
	1.758	2018.03	4.06	971.061	1.355	2729.22	1.903	476.698
	2.065	829.728	1.505	912.918	1.726	1265.31	1.602	1423.74
	2.257	916.97	2.821	428.39	1.43	1473.23	1.955	1010.2
	1.918	717.082	2.547	426.489	1.591	718.285	1.116	611.227
	1.906	1483.61			1.779	1103.4
	2.007	1288.92			1.607	2043.4
	2.808	1701.55			1.136	1882.34
	1.586	2216.09			1.993	953.037
	2.245	1996.71			1.529	1534.58
	2.064	1899.73			1.691	1448.7
	1.772	1889.01			0.836	1459.4
	2.47	1144.93			1.196	1975.47
	1.561	1785.18			0.985	1351.88
	1.91	1371.36			0.957	1565.97
	1.834	1301.9			1.465	1211.86
	1.618	1619.05			1.478	2834.8
	1.722	2185.98			1.497	1778.45
	2.284	1954.7			1.452	1654.41
	1.937	960.576			1.544	1948.01
	1.709	1412.16			3.293	935.736
	1.688	1573.4			2.375	516.148
	2.461	1704.56			2.844	2143.66
	1.658	1601.2			1.339	1227.97
	1.713	1638.26			1.269	1112.42
	2.423	1033.2			2.001	2823.87
	2.46	1139.36			1.188	2833.34
	1.774	599.127			1.578	1505.57
	2.213	471.25			2.014	502.953
	2.468	1202.75			1.064	1065.68
	2.004	738.61			1.553	467.764
	2.226	1118.56			2.133	3103.57
	2.2	1053.19			2.269	1679.36
	2.01	1894.71			1.348	1502.53
	2.205	823.504			1.422	1387.19
	1.582	745.84			1.525	2601.92
	1.761	1248.88			2.295	2740.83
	2.174	1362.37			1.665	990.415
	2.372	1458.17			2.643	3558.98
	1.92	1640.42			2.665	824.55
	1.659	1142.5			1.428	2221.28
	1.837	1747.52			2.047	1667.12
	1.864	1005.35			1.6	1638.43
	2.094	969.472			1.731	2111.81
	1.836	664.546			1.543	3764.98
	1.955	1385.3
	1.755	441
	2.454	1574
	2.529	1814
	1.5	811
	3.032	727
	1.81	1880
	2.379	768
	2.444	1762
	1.701	3114
	2.499	1193
	2.178	2272
	2.189	962
	2.249	2220
	1.937	1201
	2.685	1253
	1.865	1107
	2.618	1758
	1.522	1978
	1.783	1473
	1.744	2415
	1.721	613
