# Supplementary material for: A stable microtubule bundle formed through an orchestrated multistep process controls quiescence exit
Source: eLife. 2024 Mar 25;12:RP89958. doi: 10.7554/eLife.89958 (PMC10963028; doi:10.7554/eLife.89958)
Supplement: Figure 4—source data 1. [file elife-89958-fig4-data1.xlsx]

## Sheet: Feuil1
	WT Noc treated		kar3delta Noc treated		WT Noc treated		kar3delta Noc treated		WT Noc treated			WT Noc treated		vik1delta Noc treated		cik1delta Noc treated
	length	intensity	length	intensity	length	intensity	length	intensity	length	intensity		length	intensity	length	intensity	length	intensity
n=	63	63	172	172	54	54	61	61	105	105		65	65	76	76	113	113
Mean	1.68816	1349.52	0.786035	1007	1.87594	1359.68	0.652311	976.783	1.86399	1372.06		1.5346	2363.68	1.4558	2471.09	0.606124	2701.17
SD	0.383181	817.55	0.451752	695.924	0.564046	659.093	0.301866	544.839	0.378401	567.03		0.42797	1243.32	0.444476	1176.28	0.313393	1288.88
	data1	data1	data1	data1	data2	data2	data2	data2	data3	data3		data4	data4	data4	data4	data4	data4
	1.744	1560.16	1.462	641.804	2.941	689.808	0.465	1264.24	2.224	1268.48		1.601	1410	1.408	1372	0.354	1951.13
	1.426	761.019	1.62	1279.24	2.124	719	0.85	745.395	1.538	1543.96		1.568	1991	0.966	2164	0.631	2291.4
	1.775	1775.9	0.827	621.903	2.517	1581	0.398	879.501	1.379	745.213		0.673	9255	0.826	4886	0.389	2285.12
	1.388	732.103	0.47	224.929	2.984	716	0.428	487.371	1.218	1061.18		2.281	2428	1.527	1936	0.307	1328.28
	0.929	2612.74	0.544	1358.86	1.749	1411	0.325	708.9	1.75	1247.92		1.106	4626	0.64	1485	0.753	7166.94
	1.464	621.183	0.61	706.427	1.07	1383	0.384	1230.99	1.378	744.715		1.274	3030	1.848	2280	1.152	3736.19
	1.999	363.404	0.876	2174.86	2.862	1359	1.036	779.678	1.061	869.072		2.242	2135	1.695	2637	0.395	1508.33
	1.995	669.3	0.452	832.32	1.724	1435	0.527	1563.83	1.873	966.259		1.749	2259	2.591	1039	0.819	3225.11
	1.427	920.31	0.364	514.78	2.662	651	0.396	791.553	1.424	1053.56		1.462	1626	0.5	5667	0.434	3044.76
	2.059	190.471	0.515	266.433	1.435	1558	0.437	2918.7	1.377	1238.59		1.566	1250	1.603	4026	0.699	431.938
	1.657	855.302	0.701	1135.73	1.525	1159	0.413	458.003	0.974	629.802		1.297	2404	2.402	2296	0.43	1561.86
	0.868	1026.57	0.47	604.529	1.707	2674	0.787	957.573	2.048	844.148		1.015	2643	1.516	1507	0.474	1697.66
	1.2	871.438	0.597	587.081	0.742	2282	0.719	866.601	1.277	1016.28		1.17	2720	0.765	3959	0.734	1655.81
	2.276	1494.48	0.646	910.015	1.528	1268	0.615	1941.39	2.15	714.139		1.641	1365	0.374	3224	0.92	4663.89
	1.869	719.506	0.586	752.797	2.036	1695	1.292	1184.46	1.217	1584.19		1.422	1977	1.486	4171	1.958	4932.77
	1.418	499.935	0.9	737.253	2.595	3636	0.601	1515.52	1.723	1073.9		1.781	1513	2.171	1662	1.015	2164.59
	1.061	1352.3	1.739	838.685	1.409	972	0.578	1934.18	1.828	1925.15		1.005	1839	2.005	3179	0.572	3097.48
	0.839	1139.92	0.834	949.044	1.924	1329	1.129	923.959	1.625	2030.9		2.364	2673	1.775	1538	1.356	5059.48
	1.509	802.782	0.597	849.367	1.49	607	0.342	712.479	1.448	804.083		1.313	4330	1.255	2688	0.346	2862.97
	1.861	1555.92	1.501	613.749	1.716	1225	0.606	1595.9	1.712	1587.37		1.346	2788	1.513	2699	0.424	2788.24
	1.49	1331.68	0.398	775.063	1.38	1809	0.385	1078.33	1.535	611.127		1.785	3584	1.015	4637	0.312	2129.33
	1.226	3501.2	0.437	571.662	1.772	1173	0.467	927.351	1.506	709.973		1.068	1133	1.628	2099	0.444	2984.15
	2.064	596.461	0.555	1269.78	1.075	2028	0.608	915.536	1.946	750.288		2.019	2701	1.55	2165	0.454	1087.35
	2.16	489.749	1.336	1933.36	1.789	733	0.447	1688.58	1.907	2883.84		1.223	3486	1.452	1487	0.32	2327.11
	1.432	1902.15	1.041	714.019	2.578	1573	0.754	1035.82	1.888	2495.43		2.198	2819	0.714	4391	0.371	1399.93
	1.962	665.246	1.154	699.534	1.638	867	1.122	1572.91	1.961	1242.82		1.675	2444	1.226	1563	0.385	2384.3
	1.601	3419.38	2.141	1601.73	1.633	1009	1.476	1463.01	1.826	461.074		1.125	1841	1.6	1086	0.522	2753.22
	1.987	1350.35	0.443	1164.28	1.477	1308	0.506	843.875	2.096	812.754		1.236	2045	2.09	3936	0.688	5627.97
	1.592	1920.98	0.39	1819.42	1.96	1295	1.129	1093.14	1.99	1340.11		1.375	2011	1.485	4800	0.361	1517.12
	1.881	1556.37	0.419	778.78	3.008	1149	0.456	762.19	1.658	419.26		1.636	3024	1.812	3251	1.303	2907.38
	2.594	2353.86	1.171	575.144	1.455	1424	0.972	1080.81	1.604	1177.81		1.745	2968	1.749	4210	1.36	3451.02
	2.282	1141.65	1.21	1385.32	2.178	898	0.479	2027.89	1.969	1115.54		1.611	851	0.887	1440	1.214	3565.62
	1.704	1469.84	1.388	908.637	1.288	696	0.426	1125.15	2.113	2263.65		2.008	1960	1.411	3473	1.867	4622.12
	1.869	1306.12	0.949	2747.23	2.925	1047	0.732	1138.62	2.294	1092.53		1.752	1958	1.421	1328	0.408	376.111
	2.253	1475.8	0.456	957.921	2.149	1605	0.225	766.054	1.858	1188.78		1.361	2277	0.98	2446	0.694	2435.93
	1.167	1990.12	0.653	645.89	1.404	2631	0.505	838.075	1.854	1273.83		2.27	1301	1.565	3941	0.402	3919.78
	1.723	817.462	0.551	801.921	1.488	1405	0.958	1692.85	1.908	1489.5		1.928	2737	1.871	2710	0.31	1495.89
	1.456	2232.45	1.234	1790.02	2.741	1071	0.522	1500.66	2.075	664.99		0.653	2065	1.452	3375	0.57	347.079
	1.705	1316.3	1.232	1548.29	1.839	708	0.4	1196.25	1.363	1423.23		1.688	1711	1.925	1761	0.472	4993.08
	1.422	1544.79	2.245	717.499	2	1019	0.906	627.637	1.431	1505.78		1.812	1657	0.832	3318	0.347	882.728
	1.731	331.358	0.791	962.541	1.734	1299	0.473	486.517	1.806	706.171		0.636	2201	1.889	2090	0.472	2416.88
	1.32	2767.65	0.548	738.1	1.684	882	0.345	1669.21	2.1	1380.89		1.704	1409	1.529	2182	0.834	3119.27
	1.578	729.175	0.476	668.665	1.529	1046	0.366	1337.93	1.952	867.089		1.756	1711	1.721	979	1.497	3004.74
	1.559	1039.37	0.523	677.411	2.968	3396	0.415	1281.18	2.936	1704.51		1.032	839	1.473	1093	0.602	2055.38
	1.639	1293	1.733	1166.23	1.719	1155	0.473	404.086	2.386	1994.42		1.333	3861	1.011	2059	1.171	2531.86
	1.923	745.896	0.826	1541.06	1.45	2697	0.281	849.639	1.729	1455.52		1.062	3266	1.606	1427	0.373	1737.18
	1.524	2786.66	1.526	691.083	1.714	1293	1.088	966.749	1.54	2546.16		1.14	3046	1.355	3334	0.443	4136.46
	2.521	867.341	1.9	483.938	1.644	1031	0.422	511.237	1.593	1397.76		2.267	1220	1.615	691	0.826	5119.79
	2.076	1973.55	0.752	413.524	2.318	765	0.898	583.281	2.417	1281.63		0.94	4427	0.604	1897	0.69	2788.44
	1.776	1108.94	0.371	392.622	1.278	1034	0.411	85.1293	1.525	1827.26		1.18	3627	1.435	2059	0.411	954.805
	1.788	879.024	0.822	962.325	1.046	1180	0.897	202.027	1.474	2490.27		1.234	1973	0.73	3628	0.405	2662.74
	2.165	1576.44	0.565	1114.58	1.478	586	1.401	849.516	2.741	3085.19		1.927	1812	0.861	2161	0.597	4062.56
	1.633	3297.24	0.419	821.143	2.138	1977	1.064	187.166	2.23	727.914		1.078	2767	1.421	1523	0.442	2137.32
	2.414	1815.08	0.586	1147.53	2.084	1284	0.571	887.251	2.294	2826.38		1.419	1376	1.665	3211	0.307	3012.75
	1.651	1526.86	1.193	910.927			1.155	768.038	1.209	1523.47		1.679	2088	2.025	1563	0.566	4143.39
	1.859	675.343	1.091	1062.04			0.593	163.027	1.145	2287.45		2.065	1735	1.436	1586	0.452	1530.92
	1.38	1182.21	0.514	713.432			0.559	149.139	1.662	1528.51		1.023	1919	2.032	573	0.443	3037
	1.6	59.7646	1.13	900.572			0.9	553.15	1.198	2258.71		1.761	1657	1.038	1843	0.543	2071.06
	1.984	509.168	0.443	532.516			0.413	391.774	1.713	2021.32		2.292	1440	1.98	1333	0.627	3888.62
	1.7	1318.06	0.525	716.868			0.779	121.349	2.075	1629.1		1.622	2591	1.44	2548	0.404	2826.36
	1.416	1237.92	0.712	848.872			0.484	301.389	1.758	2018.03		1.413	1791	1.637	2439	1.163	2024.93
	1.07	3624.59	1.583	1415.21					2.065	829.728		1.642	1296	1.592	2181	0.447	3574.19
	1.713	768.737	2.328	886.836					2.257	916.97		2.195	1340	1.306	2249	0.438	694.518
			1.962	694.107					1.918	717.082		1.66	1141	1.22	3618	0.449	3750.78
			0.576	489.947					1.906	1483.61		1.645	4271	1.107	1650	0.563	2565.02
			0.354	1983.91					2.007	1288.92				1.918	1769	0.638	2758.03
			0.52	911.308					2.808	1701.55				1.229	1365	0.415	1227.34
			0.52	831.337					1.586	2216.09				1.244	1579	0.435	1920.35
			0.501	760.812					2.245	1996.71				1.265	2684	0.445	2395.82
			1.472	630.164					2.064	1899.73				1.437	859	0.798	2832.64
			0.721	577.249					1.772	1889.01				1.676	3618	0.707	5244.71
			0.455	6689.77					2.47	1144.93				1.764	1566.98	0.628	3036.55
			0.642	1688.5					1.561	1785.18				1.123	5812.15	0.39	3496
			0.7	1089.1					1.91	1371.36				1.945	1939	0.487	2265.78
			0.698	1423.76					1.834	1301.9				1.869	2585.06	0.333	1524.03
			1.836	859.191					1.618	1619.05				1.912	2276.72	0.469	3736.19
			1.284	1050.69					1.722	2185.98						0.377	1447.56
			0.498	1203.01					2.284	1954.7						0.418	1214.78
			0.976	1501.67					1.937	960.576						0.398	806.881
			0.688	1736.74					1.709	1412.16						0.662	2645.02
			0.456	1877.07					1.688	1573.4						0.345	2215.89
			1.446	999.431					2.461	1704.56						0.436	3295.19
			0.675	349.182					1.658	1601.2						0.373	2076.14
			0.564	638.093					1.713	1638.26						0.394	2106.64
			0.595	611.695					2.423	1033.2						0.51	4275.1
			0.823	614.641					2.46	1139.36						0.72	5271.15
			0.614	1514.09					1.774	599.127						0.929	3644.67
			0.69	997.418					2.213	471.25						0.46	2032.66
			0.491	1201.37					2.468	1202.75						0.439	903.179
			1.12	349.182					2.004	738.61						0.487	1903.41
			0.355	434.096					2.226	1118.56						0.437	432.255
			0.355	1047.03					2.2	1053.19						0.489	3864.84
			0.445	864.764					2.01	1894.71						0.425	471.695
			0.646	967.889					2.205	823.504						0.607	2091.41
			0.448	487.239					1.582	745.84						0.761	2434.98
			0.516	393.632					1.761	1248.88						0.445	2030.1
			0.399	278.235					2.174	1362.37						0.537	2044.12
			0.406	924.61					2.372	1458.17						0.534	2754.45
			0.51	1195.35					1.92	1640.42						0.476	3764.72
			0.376	507.253					1.659	1142.5						0.683	2454.43
			0.915	831.754					1.837	1747.52						0.731	1613.88
			0.583	706.477					1.864	1005.35						0.971	3904.45
			0.673	314.474					2.094	969.472						1.106	2810.52
			0.844	918.788					1.836	664.546						0.532	4426.23
			1.827	637.229					1.955	1385.3						0.422	1391.08
			0.62	628.671												0.456	1912.07
			0.621	1320.86												0.481	4269.43
			0.385	917.597												0.753	4279.54
			0.449	540.027												0.379	2823.88
			0.483	636.124												1.11	2714.47
			1.289	652.439												0.424	3024.45
			0.478	707.587												0.464	4862.22
			0.637	1166.5												0.445	2073.2
			0.576	743.869
			0.409	1154.4
			0.688	576.893
			0.613	1290.43
			1.206	690.824
			0.428	885.212
			0.833	4738.6
			1.434	444.183
			0.829	1535.12
			0.496	1632.02
			2.016	475.438
			0.62	930.214
			0.498	873.431
			0.502	722.817
			0.639	1021.85
			0.427	1685.7
			0.403	538.98
			0.41	1105.26
			0.584	2177.37
			0.376	715.258
			0.757	1130.22
			0.379	1031.27
			0.519	720.994
			0.471	993.852
			0.388	1513.86
			1.041	1093.19
			2.119	755.65
			0.526	768.339
			0.43	480.303
			0.359	1066.24
			0.481	830.473
			0.474	1103.72
			1.118	644.952
			0.486	641.117
			1.51	973.177
			1.906	760.114
			0.709	554.096
			0.794	1805.2
			0.683	1829.82
			0.581	333.036
			1.293	938.84
			0.457	505.984
			0.426	988.098
			0.462	446.126
			0.896	1059.04
			0.733	959.348
			0.49	458.861
			0.443	911.8
			0.43	678.207
			0.355	970.252
			0.859	1419.06
			0.452	2130.58
			0.742	2945.4
			0.396	1527.14
			0.689	798.631
			0.759	807.065
			0.883	883.773
			1.135	1305.97
			0.372	376.267
