# Supplementary material for: A stable microtubule bundle formed through an orchestrated multistep process controls quiescence exit
Source: eLife. 2024 Mar 25;12:RP89958. doi: 10.7554/eLife.89958 (PMC10963028; doi:10.7554/eLife.89958)
Supplement: Figure 4—source data 2. [file elife-89958-fig4-data2.xlsx]

## Sheet: Feuil1
	WT strain															kip1delta strain															cin8delta strain															kip3delta strain
n=	227	251	313	296	214	241	355	270	462	507	498	432	381	384		190	173	148	163	195	192	212	221	303	364	271	268	208	322		209	179	209	202	248	171	271	267	210	196	201	207	234	258		204	170	214	226
Mean	0.814467	0.757637	0.82892	0.826507	1.26748	0.915589	1.2945	1.01509	1.40886	1.34235	1.47329	1.47598	1.40637	1.33651		0.6632	0.699873	0.756696	0.736025	1.18876	0.850776	1.49467	0.960421	1.39918	1.01918	1.23831	0.934813	1.30214	1.00427		0.872263	0.882832	0.950756	0.937257	1.22847	0.783491	1.19504	0.890135	1.38502	1.0589	1.39984	1.48184	1.34822	1.36		1.19355	1.19119	1.0175	1.16578
SD	0.344538	0.301188	0.34831	0.34682	0.640751	0.338502	0.544218	0.423702	0.466465	0.491323	0.485249	0.511939	0.521968	0.480079		0.316896	0.30814	0.385112	0.38442	0.677742	0.417993	0.756769	0.490968	0.471223	0.383291	0.527058	0.37893	0.537931	0.496992		0.436364	0.487923	0.54905	0.525139	0.710279	0.467024	0.667496	0.502211	0.615749	0.556668	0.739097	0.705462	0.556217	0.560008		0.483591	0.454823	0.537878	0.504403
T-test	0.0566365		0.931774		4.69376e-12		1.56079e-12		0.0309269		0.934556		0.0544368			0.264625		0.636443		8.45992e-09		1.44238e-16		8.73181e-27		8.58376e-14		3.90735e-10			0.823457		0.799041		7.89783e-14		3.94427e-09		3.88413e-08		0.252544		0.815178			0.961294		0.00305688
	+4h	+4h Noco	+7h	+7h Noco	+27h	+27h Noco	+48h	+48h Noco	+72h	+72h Noco	+90h	+90h Noco	+162h	+162h Noco		+4h	+4h Noco	+7h	+7h Noco	+27h	+27h Noco	+48h	+48h Noco	+72h	+72h Noco	+90h	+90h Noco	+162h	+162h Noco		+4h	+4h Noco	+7h	+7h Noco	+27h	+27h Noco	+48h	+48h Noco	+72h	+72h Noco	+90h	+90h Noco	+162h	+162h Noco		+4h	+4h Noco	+7h	+7h Noco
	0.322	1.6	0.563	1.008	1.826	1.419	1.785	1.28	1.425	1.601	1.316	2.4	1.65	1.449		0.394	0.434	1.024	0.39	2.131	0.347	0.635	0.258	1.323	1.455	0.886	1.712	1.532	0.62		0.775	0.491	0.791	0.814	0.736	0.529	1.426	0.64	2.566	1.761	3.237	1.712	1.356	1.269		1.369	1.232	0.516	1.01
	1.533	0.973	0.822	0.777	1.746	0.936	2.101	0.822	0.775	1.71	1.108	1.143	1.648	1.632		0.365	0.388	0.332	0.329	0.892	0.361	1.51	0.439	1.355	1.01	1.83	1.596	1.632	1.221		0.606	0.439	1.847	1.168	1.742	0.516	0.532	0.71	0.584	1.932	1.306	1.118	1.653	1.702		1.091	1.098	0.292	0.643
	0.297	0.52	0.456	1.05	2.276	1.252	2	0.616	1.512	1.734	2.481	1.701	2.561	2.305		0.322	0.329	0.392	0.347	1.111	1.123	2.773	0.439	2.186	1.347	1.31	0.798	1.155	0.388		0.735	0.563	1.71	1.449	2.483	0.683	2.575	0.448	2.076	0.525	1.485	1.795	0.962	1.195		1.31	1.084	0.534	1.506
	0.505	0.688	1.058	0.829	1.144	0.712	0.707	0.896	1.958	1.449	1.551	1.411	1.612	1.098		0.419	0.297	0.449	0.26	0.981	0.332	1.095	1.096	2.392	0.728	0.767	0.297	1.4	0.742		1.627	0.581	0.606	1.564	0.39	0.725	0.376	0.492	1.012	1.001	0.993	0.626	2.575	1.652		1.245	2.202	0.671	1.128
	0.571	0.551	1.221	0.692	3.102	1.236	2.163	1.744	1.504	1.963	0.987	1.538	1.29	2.126		0.252	0.297	0.449	0.356	1.01	0.812	1.99	2.379	1.695	1.415	1	0.871	1.637	0.552		0.62	1.254	0.43	0.488	0.909	0.548	0.502	0.755	0.484	0.484	0.952	0.616	1.567	0.981		1.581	1.762	0.551	0.324
	1.158	0.491	1.259	1.499	1.387	0.765	0.581	1.58	1.809	1.582	0.529	2.349	3.082	1.682		0.297	0.563	0.541	0.525	1.298	0.753	1.624	1.054	1.356	1.045	0.745	0.725	1.073	0.665		0.525	0.736	0.665	0.322	0.725	0.451	0.88	0.577	1.743	0.62	2.546	1.449	0.975	1.706		0.918	0.809	0.707	0.276
	1.174	1.02	1.113	1.292	1.459	0.955	1.002	0.903	1.789	2.338	0.953	1.51	1.71	1.111		1.71	0.304	0.555	0.937	0.228	1.428	1.037	0.51	1.355	1.04	1.652	0.68	1.55	2.019		1.172	0.91	1.088	1.194	0.852	0.439	2.246	0.769	2.973	0.571	1.837	1.114	1.426	2.379		1.29	1.091	1.326	1.025
	0.653	0.484	0.745	0.797	1.834	1.03	0.981	0.777	1.277	0.876	1.425	1.755	1.193	1.329		0.829	0.485	0.288	0.408	0.485	0.981	0.368	1.856	1.355	1.013	0.904	0.922	1.789	1.288		1.018	0.347	0.958	1.168	0.898	0.332	2.805	1.119	0.439	1.197	0.344	1.53	1.464	1.984		1.347	1.02	0.376	0.529
	0.908	1.065	0.6	0.839	1.521	1.593	1.549	0.851	1.54	1.101	0.785	2.021	1.995	1.477		1.197	0.419	1.601	1	1.212	0.595	0.861	0.983	3.004	1.197	1.265	0.844	2.606	1.204		0.735	1.056	1.183	0.551	1.666	0.62	1.217	0.937	1.859	0.665	3.786	2.987	0.451	1.131		0.306	0.981	0.671	2.678
	0.68	0.737	1.119	0.42	1.143	0.449	0.612	2.102	0.966	2.821	1.588	1.334	0.847	1.621		0.548	0.306	1.586	0.235	0.742	0.753	1.347	1.542	2.264	0.826	1.116	0.552	2.914	0.458		2.149	0.949	0.673	0.555	1.734	1.397	2.497	0.822	2.801	1.737	1.896	1.279	2.063	1.396		0.68	1.172	0.541	0.404
	1.045	1.285	0.707	1.033	1.108	0.912	0.614	0.837	1.537	1.824	1.354	1.531	1.588	1.02		1.259	0.806	0.774	0.665	0.304	0.529	1.174	1.756	1.428	1.193	0.767	1.5	2.28	0.376		0.484	1.683	0.936	0.777	1.119	0.708	1.354	0.707	1.962	1.676	1.336	0.918	0.665	1.444		1.298	0.912	1.449	0.809
	0.844	0.292	2.259	0.26	0.923	0.962	1.406	0.742	1.577	2.176	1.464	1.686	1.805	1.278		0.433	0.529	0.636	0.361	2.407	0.404	0.861	1.241	2.48	0.678	1.776	0.952	2.032	0.43		0.581	2.366	0.408	1.411	0.851	0.376	1.228	0.361	0.458	1.463	1.334	0.949	2.303	1.788		1.82	0.453	1.208	0.767
	1.013	0.485	0.671	0.913	0.857	0.652	1.2	0.868	2.124	1.455	1.529	2.583	1.39	0.897		0.392	0.493	0.806	0.26	2.009	1.194	0.433	1.074	1.183	0.51	0.976	0.868	1.512	0.678		0.39	0.392	2.032	1.209	0.745	0.394	0.608	1.399	0.557	0.505	2.039	1.239	1.653	1.324		1.596	1.573	1.356	1.042
	0.465	0.451	0.343	0.276	0.521	1.422	1.56	0.824	1.442	0.922	1.039	2.523	1.054	1.68		0.491	0.42	1.172	0.399	1.834	0.304	1.717	1.053	1.5	1.197	1.228	1.024	1.221	1.259		1.848	0.71	0.731	0.424	1.264	0.368	1.431	0.832	0.841	0.821	1.808	1.97	0.623	1.449		0.942	1.14	0.97	0.767
	0.769	0.343	0.504	1.256	1.615	1.356	0.62	1.141	0.7	1.064	1.228	2.305	3.028	2.04		0.318	0.322	1.084	1.623	1.55	0.306	1.665	0.549	0.462	0.69	0.322	0.439	1.209	0.479		0.966	1.422	0.613	1.789	1.638	0.356	2.904	0.47	0.821	0.981	3.651	1.169	1.193	1.442		1.103	1.227	1.033	1
	1.174	0.349	0.549	1.002	0.678	1.316	1.746	1.428	1.085	0.787	1.103	1.301	0.962	0.868		1.04	0.292	1.297	0.349	2.917	0.361	0.742	0.581	0.952	0.695	0.868	1.104	1.358	1.169		0.563	1.706	0.735	0.399	1.413	1.102	0.877	1.264	1.776	0.721	2.236	2.617	1.948	1.553		1.054	0.981	1.305	0.93
	0.981	1.02	1.064	0.419	1.104	1.128	1.528	0.574	1.388	0.987	1.35	2.665	0.987	2.255		0.721	0.26	1.174	1.034	2.569	1.587	2.925	1.369	1.618	0.829	2.18	0.704	1.491	0.736		1.126	1.785	0.824	2.076	1.461	2.062	0.937	0.745	1.66	0.832	1.569	1.359	1.045	0.877		0.613	0.462	0.451	0.361
	0.665	0.939	0.981	0.51	0.616	0.761	1.615	1.231	1.121	1.65	1.516	1.717	1.802	0.868		0.662	0.408	0.376	0.297	0.987	0.458	1.239	1.076	1.532	1.012	1.336	0.552	1.704	0.735		0.43	1.557	3.071	1.313	1.92	1.405	1.948	0.88	0.6	1.278	1.829	1.409	0.577	1.503		1.081	1.62	0.949	0.525
	0.532	0.684	0.737	1.256	2.821	1.01	1.239	1.833	0.914	0.838	1.098	1.563	0.581	0.725		0.516	0.52	0.584	0.368	0.439	0.458	1.909	0.769	1.183	0.649	1.659	0.595	1.197	1.145		1.66	0.549	0.725	1.997	1.743	1.278	2.085	1.161	1.745	0.808	0.551	1.289	2.225	1.799		1.113	1.236	0.532	1.198
	0.42	1.018	0.851	0.837	1.125	0.968	1.46	1.05	0.966	0.745	1.026	2.024	0.64	0.448		0.78	0.365	0.812	0.608	1.01	0.854	0.449	1.053	1.076	0.439	1.204	0.581	1.963	0.595		0.563	0.922	0.908	1.02	0.942	1.66	1.285	1.084	1.749	2.66	2.19	1.061	1.05	0.968		1.717	0.976	0.639	1.393
	0.388	1.265	0.94	0.368	0.753	1.529	0.68	1.387	1.254	1.33	1.387	1.851	1.004	0.809		0.356	0.75	1.674	1.467	1.688	1.084	0.904	1.736	1.096	0.745	1.084	0.47	2.126	0.876		0.408	1.181	1.533	2.24	1.755	0.532	0.581	0.6	1.482	1.302	0.766	1.586	0.665	0.649		1.144	0.787	0.456	1.013
	0.876	0.388	0.9	0.807	0.639	1.296	1.161	0.58	0.822	2.225	1.502	1.145	1.92	0.581		0.392	0.476	0.649	0.871	1.501	0.356	1.632	0.592	1.307	0.424	1.691	1.756	1.391	2.965		0.424	1.241	0.721	1.177	1.393	2.084	0.537	0.517	2.274	1.347	0.525	1.2	0.904	2.33		0.981	0.873	1.517	1.929
	0.809	0.484	0.413	0.501	1.685	0.492	0.908	0.581	1.162	1.112	1.361	2.107	0.88	1.212		0.923	1.322	0.356	1.145	1.04	0.322	1.216	1.29	0.725	0.742	1.916	0.306	1.012	0.908		0.708	0.827	0.577	1.101	1.909	0.277	1.583	0.791	2.165	1.673	1.23	2.387	0.812	1.065		0.505	1.506	0.439	1.101
	1.474	1.136	1.189	0.88	0.392	0.564	0.64	1.662	0.99	3.168	1.289	1.969	1.971	2.132		0.479	0.376	0.448	1.913	1.516	0.26	2.057	2.178	1.66	1.103	0.873	0.865	1.688	0.549		1.2	1.521	0.892	0.781	0.653	0.517	0.677	0.88	0.541	1.02	1.003	1.588	1.521	0.871		1.723	0.78	0.886	1.322
	1.197	1.378	0.793	0.451	0.525	0.871	0.555	1.002	1.158	1.391	1.136	0.952	1.389	1.581		0.277	0.274	1.241	0.484	1.14	1.165	0.785	1.214	1.261	0.71	1.484	1.48	2.085	0.626		1.677	0.9	0.826	0.692	4.157	0.476	0.981	0.505	0.9	1.378	1.718	0.555	1.727	0.993		1.047	0.433	2.011	0.439
	0.581	0.324	0.68	1.01	0.51	0.549	1.655	0.529	1.181	1.228	1.209	1.875	2.168	1.832		0.714	0.484	0.678	0.574	1.2	1.809	1.48	1.183	1.718	1.361	2.042	1.428	2.034	0.26		1.039	1.033	0.516	0.534	0.809	0.634	0.548	0.501	0.537	0.91	1.471	2.13	1.441	2.63		1.413	1.748	1.065	0.97
	0.822	0.712	1.413	0.775	0.877	0.798	1.992	1.189	1.581	1.749	1.501	0.762	1.217	1.392		0.689	0.233	0.413	0.917	1.48	1.368	2.683	0.826	1.369	1.096	0.58	0.304	1.678	0.868		1.343	0.822	1.095	2.08	0.88	1.327	0.664	1.258	1.521	1.89	0.389	2.56	1.053	1.306		1.05	1.145	0.479	0.68
	0.52	1.033	0.868	0.937	1.126	0.868	2.008	0.876	2.055	1.627	1.405	1.374	1.719	2.013		0.71	0.51	0.616	1.194	0.721	0.413	0.814	0.493	1.414	0.808	1.359	1.013	0.975	1.748		1.183	1.039	1.261	0.404	0.635	0.571	1.061	0.797	1.379	1.161	0.585	1.536	0.451	1.588		1.078	1.419	0.355	1.209
	0.322	0.479	1.076	1.533	1.949	1.01	1.485	1.494	0.475	0.985	1.984	1.992	2.14	1.458		0.752	0.707	0.777	1.013	0.563	0.517	3.675	1.848	1.841	0.458	2.194	1.635	0.937	1.065		0.235	0.318	0.981	0.595	0.377	1.118	1.082	1.734	2.011	0.791	1.846	2.354	0.905	1.659		1.573	1.877	0.923	1.905
	0.368	0.332	1.091	0.75	0.623	1.125	0.841	0.504	1.17	0.645	1.14	1.72	1.003	0.851		0.42	0.521	0.337	0.433	2.077	1.252	0.937	1.128	1.245	0.529	2.379	1.463	2.433	2.163		0.881	0.404	0.742	0.52	1.697	0.394	0.552	0.798	2.219	0.448	2.654	2.584	0.532	1.811		1.112	1.505	0.548	1.033
	0.767	0.716	0.541	0.707	1.4	0.564	0.493	0.548	0.705	1.276	1.444	1.478	1.581	0.976		0.665	0.465	0.602	1.323	1.342	0.584	1.558	0.462	1.707	1.302	1.792	0.71	1.461	1.226		0.737	2.007	0.779	0.318	0.574	1.69	0.841	0.807	1.612	1.596	0.775	2.097	1.163	0.781		1.346	1.484	0.361	1.637
	0.574	0.777	0.736	1.008	1.408	0.584	1.39	0.814	1.012	0.97	1.256	2.468	1.047	1.732		0.387	0.392	1.627	0.304	1.181	0.868	1.068	0.368	1.082	0.923	1.227	0.42	1.278	1.033		0.936	0.228	0.896	0.838	1.229	0.456	1.612	0.589	1.183	0.337	0.709	0.394	1.543	0.62		2.466	1.235	0.807	1.532
	1.219	0.809	1.278	0.793	0.935	0.775	1.258	0.987	1.116	1.226	0.922	2.088	1.467	1.48		0.26	0.329	0.665	0.226	0.985	0.777	2.096	0.78	0.765	1.323	1.33	0.859	1.173	0.361		0.981	1.154	0.47	1.02	2.352	0.484	1.424	1.025	2.235	1.008	2.507	0.707	2.167	1.675		1.209	0.844	1.492	1.119
	1.512	0.62	1.165	0.52	1.327	1.582	0.797	1.33	1.211	1.326	0.829	1.909	0.563	1.183		0.42	0.822	0.949	0.465	0.62	0.797	2.051	0.51	2.401	1.256	1.068	1.163	1.119	1.198		0.595	0.479	0.404	1.387	0.516	0.439	0.736	0.216	0.39	1.748	1.23	1.187	1.601	1.458		1.458	1.789	1.582	1.46
	1.037	1.461	0.93	0.896	1.128	1.402	1.292	0.752	1.308	1.241	1.551	0.871	1.984	1.449		0.368	1.064	0.97	0.448	1.316	0.745	2.269	0.52	1.228	2.085	1.896	0.698	1.271	0.462		1.254	1.776	0.419	0.462	1.448	0.877	0.847	1.318	0.981	1.918	0.751	1.677	1.845	1.628		1.042	1.805	1.809	1.548
	0.677	0.737	1.096	0.97	2.045	0.892	2.308	0.838	1.471	1.387	1.737	0.946	1.184	1.809		0.51	1.078	0.996	0.517	0.318	1.457	0.737	0.343	1.204	1.148	1.119	1.02	1.234	1.212		0.904	1.104	0.777	1.457	1.02	0.392	0.826	0.798	1.103	1.259	2.987	0.387	1.776	2.162		1.246	0.736	0.377	1.013
	1.307	0.616	0.962	0.52	1.599	1.169	3.087	1.295	1.838	0.753	0.775	3.157	1.457	0.887		0.433	0.714	0.504	1.228	1	0.517	1.779	0.614	2.239	0.91	0.593	1.369	1.379	1.129		1.163	0.653	0.39	0.71	0.377	0.277	0.871	0.571	0.716	0.322	0.818	2.448	0.791	1.781		0.88	0.97	0.71	1.643
	1.204	0.981	0.837	1.261	0.852	1.234	0.976	1.033	0.7	2.232	1.962	1.419	1.798	1.156		0.593	0.593	0.983	1.653	0.648	1.411	0.981	0.707	1.316	1.04	0.68	1.189	1.992	0.698		1.776	0.91	1.316	0.93	2.165	0.462	0.424	0.549	1.072	0.814	1.25	1.326	1.234	0.745		0.69	0.636	1.516	1.002
	1.635	0.91	0.645	1.081	1.848	0.857	1.096	1.307	1.29	1.536	1.03	1.078	3.168	1.285		0.26	0.721	0.981	0.635	2.503	0.868	0.377	1.053	1.487	0.735	0.64	0.274	0.571	1.112		0.534	1.165	0.549	1.169	0.929	0.392	0.479	0.413	0.602	1.419	3.132	1.961	1.586	0.626		0.979	1.018	0.292	0.297
	1.461	0.43	0.698	1.343	0.886	0.892	1.618	1.967	0.473	2.131	2.131	1.512	2.048	1.94		0.462	0.479	1.273	0.848	2.619	1.385	1.893	1.529	1.602	1.047	0.648	1.04	1.195	0.684		0.557	0.806	0.847	1.491	1.65	1.977	0.322	0.266	0.653	0.983	1.52	1.809	1.549	1.762		0.698	2.279	1.714	0.549
	1.074	0.809	0.413	1.143	2.952	0.408	1.619	0.456	0.525	2.005	2.081	1.746	1.195	0.51		0.736	0.612	0.525	0.797	1.05	0.626	2.621	1.824	1.367	0.827	0.797	0.839	0.797	0.847		0.577	2.631	0.593	0.288	1.471	0.525	0.361	1.756	1.697	1.847	0.645	1.01	0.769	0.42		1.316	0.89	0.649	2.299
	1.078	0.52	0.826	0.6	0.979	1.104	1.298	0.595	1.538	1.417	1.824	2.623	1.569	1.601		0.534	1.494	0.78	0.324	2.426	0.837	3.142	0.78	1.388	0.756	1.054	0.557	1.161	0.451		1.082	0.677	2.354	0.658	1.875	0.462	0.755	0.937	1.76	1.145	1.04	0.581	1.853	3.651		0.728	1.072	1.144	1.596
	0.975	0.246	0.814	0.652	2.737	0.975	1.761	2.085	0.693	1.712	1.01	2.051	1.968	1.804		0.456	1.14	0.355	0.581	0.801	0.388	0.779	0.52	1.169	0.361	0.775	1.245	1.66	0.962		0.707	0.297	0.868	1.338	1.432	0.684	0.785	0.516	1.575	0.525	0.669	2.707	1.533	0.337		0.42	0.479	0.678	0.958
	0.653	1.288	1.214	1.096	2.673	0.935	1.042	0.433	1.659	1.485	0.683	0.962	0.775	1.392		0.484	0.306	1.341	0.785	0.537	0.725	0.606	0.368	1.234	1.074	0.616	0.69	2.752	1.461		0.68	0.517	1.068	0.6	1.494	1.224	0.887	2.25	1.004	1.82	0.396	0.552	1.387	2.066		0.623	1.228	0.525	0.304
	1.388	0.735	1.133	0.767	0.851	0.613	2.176	0.908	1.158	0.904	1.236	0.808	0.797	1.103		0.765	0.64	0.368	0.649	0.665	0.343	1.811	0.453	1.163	0.484	0.673	0.865	1.918	0.774		0.755	0.356	0.448	1.361	1.316	1.402	1.252	1.48	2.081	0.616	0.99	1.03	1.583	1.863		1.405	1.231	1.397	1.893
	0.808	1.098	1.039	0.838	1.074	0.707	1.246	1.082	0.993	0.456	1.049	1.652	0.798	1.252		0.903	0.952	0.424	0.626	1.101	1.387	1.688	1.298	2.128	0.752	1.616	1.259	2.481	1.037		0.501	0.62	0.42	0.636	1.862	0.476	1.388	1.174	2.295	1.156	2.432	1.261	2.738	1.852		0.993	0.592	1.397	1.026
	0.623	0.529	0.868	0.297	1.601	0.851	1.295	1.158	1.502	1.04	1.372	0.635	1.563	1.607		0.456	0.548	0.377	1.008	0.897	0.756	1.415	1.144	1.612	0.704	1.426	1.866	0.993	0.71		1.536	1.514	0.458	0.584	0.529	0.837	1.278	1.101	2.146	1.717	0.585	1.081	2.081	0.912		1.653	1.316	0.52	1.241
	1.211	0.419	1.688	0.678	0.465	0.548	0.881	0.645	1.161	1.347	0.592	1.616	0.485	1.549		0.78	1.226	0.39	0.616	1.271	0.465	2.122	0.297	0.306	0.881	1.113	1.039	1.136	0.581		0.453	1.638	0.737	1.392	1.054	1.748	1.246	0.505	0.852	0.419	0.172	1.466	1.484	0.767		1.013	1.008	0.606	1.151
	0.761	1.04	0.368	0.347	1.942	0.94	2.617	1.385	1.189	1.267	1.235	2.058	1.326	1.948		0.777	0.52	0.549	0.93	0.868	0.204	1.743	0.439	1.628	1.422	1.02	0.297	2.248	0.949		0.852	1.576	0.841	0.439	0.837	0.809	0.376	0.349	1.551	1.122	0.544	0.388	0.787	0.832		1.252	1.499	0.822	1.194
	0.822	0.886	0.453	0.658	0.448	0.949	0.867	0.871	1.283	0.595	1.324	1.455	1.533	0.555		0.532	0.922	0.58	1.379	1.935	0.207	2.472	1.503	0.419	0.537	0.501	2.317	1.756	1.136		0.365	0.537	0.387	1.163	1.204	0.337	1.197	0.652	0.761	1.499	2.064	1.588	1.487	1.528		1.039	1.586	1.956	1.455
	0.42	0.665	0.68	0.652	0.505	0.226	1.392	0.602	0.816	0.39	2.036	1.639	0.898	1.506		1.413	0.623	0.827	0.392	0.517	0.525	2.009	0.595	2.196	0.781	2.129	1.235	2.815	0.399		1.172	1.42	1.418	0.737	0.343	0.736	0.502	1.068	0.937	1.511	0.639	1.903	0.868	1.032		1.968	1.096	1.415	1.103
	0.516	0.937	0.892	0.712	0.791	1.511	1.324	0.923	1.174	1.323	1.133	2.581	0.484	0.606		0.6	0.476	0.589	0.564	1.952	0.665	1.422	1.734	1.008	1.028	0.905	1.517	1.393	0.851		1.703	0.297	0.798	0.521	0.448	0.71	1.173	0.593	1.917	1.755	0.481	0.731	1.4	1.644		0.97	2.161	0.419	1.236
	1.069	0.839	1.181	1.069	2.36	1.235	0.62	1.279	1.033	1.525	1.278	0.775	1.378	1.399		0.731	0.404	1.034	0.419	1.197	0.318	2.194	0.816	1.297	1.522	1.632	0.453	1.69	1.072		0.696	1.347	1.428	1.026	2.26	0.6	0.931	2.202	2.165	2.052	1.106	1.732	1.516	2.165		1.156	0.871	1.571	0.844
	0.42	0.42	1.518	0.913	1.291	0.616	2.052	0.686	0.645	1.514	0.896	2.411	0.968	1.285		0.797	1.212	0.552	0.881	1.449	0.616	1.422	0.742	1.419	1.405	0.94	0.47	1.549	0.765		0.71	0.439	0.555	0.387	1.91	0.886	0.742	2.523	1.757	0.361	1.145	2.201	0.742	0.981		1.3	0.897	1.211	1.061
	0.871	0.612	0.892	0.42	0.584	0.787	1.616	0.51	1.673	1.02	0.809	1.705	1.358	2.516		0.847	0.571	0.6	0.388	1.548	1.426	0.898	1.425	0.707	0.887	0.368	0.595	1.92	1.002		2.106	1.226	1.977	1.548	0.492	0.797	0.787	1.041	1.211	1.302	1.55	2.517	1.876	1.744		0.564	1.066	0.653	1.072
	0.419	0.581	0.752	1.039	0.439	1.204	1.193	0.322	1.162	1.305	0.844	1.145	0.817	0.785		0.581	0.574	0.376	1.313	2.619	0.529	1.31	0.626	1.655	1.056	0.777	0.972	1.646	0.837		0.606	0.755	2.101	1.082	0.439	1.073	0.886	0.658	1.154	0.434	1.05	2.798	1.232	0.116		1.141	0.798	0.871	1.395
	1.333	1.511	2.451	0.972	0.453	1.024	1.666	1.259	0.975	1.995	1.556	1.538	1.779	0.652		0.361	0.62	1.096	0.64	1.236	1.29	1.129	0.852	1.864	1.71	0.912	1.226	2.71	0.304		0.43	0.958	0.484	0.797	1.241	0.329	0.761	0.712	0.664	1.532	1.121	1.096	1.084	0.616		1.221	2.199	1.491	0.349
	0.755	0.939	1.358	1.05	1.174	1.082	0.728	0.937	0.952	2.07	1.697	1.429	0.581	1.37		0.485	0.493	0.563	0.88	1.335	0.343	1.582	1.805	1.156	1.39	0.892	1.424	0.571	1.864		0.684	1.835	1.145	1.228	2.168	0.456	0.525	0.532	0.68	2.645	1.183	2.045	2.544	1.235		1.152	1.02	0.563	1.635
	0.968	0.731	0.996	1.076	2.418	0.228	0.614	0.204	0.616	0.534	1.378	1.999	0.955	2.061		0.584	0.993	0.571	0.725	1.256	0.332	1.123	0.488	1.129	1.893	0.716	1.496	1.355	0.593		0.51	1.034	0.592	0.62	2.803	1.173	0.648	0.581	0.912	0.91	1	1.39	0.731	0.847		1.806	0.521	0.665	1.302
	0.563	0.735	1.853	0.822	1.181	0.62	2.122	0.993	1.6	1.327	1.488	1.308	1.327	1.254		0.356	0.664	1.351	0.725	1.02	0.277	2.41	1	1.746	1.328	0.665	1.145	1.548	1.028		0.767	0.51	1.184	0.521	1.484	1.553	0.939	1.717	1.755	0.716	1.04	2.645	2.862	1.056		0.913	1.573	0.434	1.169
	0.593	0.806	0.571	0.337	1.42	0.798	1.208	0.968	1.939	1.279	1.469	1.696	1.389	0.753		0.318	0.808	0.548	0.549	1.297	0.809	1.2	0.555	2.505	0.42	1.387	0.69	1.558	0.695		1.991	0.867	1.096	0.347	3.367	0.476	1.101	0.493	0.838	1.292	0.52	1.601	1.903	1.566		1.875	0.653	0.653	0.419
	0.829	0.832	0.816	0.574	1.358	0.716	1.141	1.323	1.655	1.543	1	1.121	1.385	1.326		0.433	0.814	0.491	0.322	1.76	1.148	1.069	0.488	1.717	1.114	0.453	0.571	0.908	1.004		0.492	1.129	1.413	1.548	1.753	1.316	2.419	1.635	0.75	0.852	0.864	1.154	1.779	1.259		1.536	0.356	1.013	1.395
	0.174	1.088	0.865	0.355	1.755	0.476	1.484	0.424	0.532	2.077	1.529	2.191	1.95	0.752		0.207	0.563	0.645	0.226	1.205	0.404	0.564	1.039	1.98	0.966	1.615	0.838	1.516	2.775		0.664	0.759	1.236	0.918	1.778	0.968	0.484	0.433	2.3	2.06	0.808	1.119	1.405	1.419		1.045	1.102	0.94	0.824
	0.826	0.97	1.204	0.433	0.848	0.653	1.582	0.534	0.911	1.957	0.808	2.026	1.029	1.241		0.551	1.4	0.602	0.581	0.517	0.936	1.33	0.505	1.734	1.169	1.843	0.787	1.861	0.759		0.355	1.232	1.966	0.653	0.274	0.541	0.493	1.181	1.599	1.393	2.52	0.337	1.906	0.593		1.197	2.236	1.878	1.503
	0.332	0.958	0.62	1.51	1.278	0.94	2.054	1.122	0.914	1.806	1.602	1.367	1.329	2.183		0.714	0.665	1.134	0.388	3.176	0.266	2.284	0.297	0.592	0.868	1.807	0.626	1.096	1.04		0.356	0.504	1.487	2.459	0.793	0.439	0.449	1.2	1.284	0.809	1.247	1.807	1.892	2.263		0.712	1.459	1.607	1.29
	0.635	0.908	0.962	1.132	1.813	0.448	0.574	1.665	0.774	1.228	1.134	1.129	1.165	1.708		0.453	0.563	0.361	0.551	0.392	1.152	1.789	0.606	1.232	0.555	1.169	2.301	0.752	1.261		0.52	1.477	1.259	0.756	1.532	0.204	0.968	0.233	1.425	1.548	0.944	1.942	0.376	1.768		1.388	1.409	0.377	0.817
	0.448	0.361	0.52	1.072	0.736	0.551	0.433	0.616	1.294	1.037	1.295	0.928	0.551	0.894		0.361	0.942	0.626	0.42	0.851	0.581	2.27	1.187	1.876	0.557	1.583	0.571	0.479	1.533		1.422	0.451	0.479	0.975	1.666	0.462	3.287	1.264	1.049	1.292	1.125	2.438	1.893	1.564		1.184	1.145	0.552	0.957
	0.529	1.025	0.777	0.881	0.806	1.053	0.388	0.696	1.625	2.328	1.211	1.962	1.163	1.02		0.52	1.073	0.844	1.197	0.377	0.645	1.846	0.824	0.645	0.801	0.626	0.692	1.068	1.013		1.096	0.419	0.493	0.962	0.563	0.318	0.593	0.62	2.233	1.411	1.704	1.928	1.807	1.457		0.737	0.557	1.431	0.64
	0.322	0.616	0.448	0.678	1.118	0.649	1.341	1.058	1.328	1.969	1.3	1.75	0.725	0.329		0.877	0.626	1.264	0.707	0.319	0.529	0.62	0.871	1.329	0.821	0.593	1.072	1.578	1.3		0.639	0.492	0.434	0.356	1.024	0.581	1.491	0.324	1.214	1.559	1.211	0.555	1.28	1.55		1.129	0.665	1.221	1.945
	0.368	1.46	0.752	1.177	0.318	0.725	1.644	0.521	1.605	0.852	1.809	1.026	1.163	1.529		0.404	0.877	0.465	0.376	0.952	0.793	0.47	0.993	1.033	1.504	0.581	1.129	0.692	0.246		0.623	0.492	1.877	0.922	0.91	1.133	0.725	0.593	1.252	1.344	2.328	0.871	1.737	0.937		1.548	1.748	0.47	1.133
	0.26	0.742	0.962	1.446	0.42	0.721	2.112	1.271	0.389	1.039	1.512	1.52	1.616	1.876		0.479	0.449	0.517	0.485	0.377	0.903	0.94	0.767	1.082	1.347	1.163	0.765	1.491	1.834		0.636	1.156	1.084	1.025	1.141	0.581	1.112	0.549	0.993	1.172	0.406	2.057	0.753	1.505		0.6	0.806	0.767	2.156
	1.503	1	0.635	0.541	1.516	0.725	1.136	1.65	1.978	1.194	1.194	1.344	1.825	0.981		0.521	0.563	0.448	0.399	0.42	0.246	3.118	0.439	1.492	0.924	1.834	1.432	1.596	0.665		0.51	2.366	0.806	2.381	2.86	1.529	1.854	0.51	1.042	0.252	2.077	1.734	0.52	0.817		0.826	0.909	1.355	0.404
	1.177	0.595	0.868	1.307	0.404	1.193	2.901	0.809	1.675	1.193	1.114	0.463	1.431	2.587		1.395	0.479	0.552	1.018	1.631	0.937	0.549	1.232	1.776	1.088	1.688	1.001	0.775	1.602		0.343	0.852	0.501	1.449	0.404	1.419	0.58	0.476	0.868	0.975	1.068	0.917	2.688	1.328		1.155	0.571	1.356	1.284
	0.957	0.502	0.801	1.246	0.822	0.857	2.005	0.698	1.406	1.991	1.622	1.686	1.838	1.039		2.065	0.653	1.709	0.419	2.207	0.993	1.557	0.58	1.422	0.735	0.851	0.731	2.216	2.339		0.399	2.114	0.563	1.209	0.824	0.616	1.037	1.239	2.161	1.102	0.608	1.428	1.56	1.3		0.854	1.126	1.183	1.51
	0.929	0.721	0.593	0.71	0.832	0.58	1.659	1.414	2.735	1.049	1.962	1.385	1.945	0.606		0.266	0.698	0.534	0.376	1.058	1.646	2.99	1.69	0.68	1.98	1.596	1.126	0.936	0.626		0.707	0.894	1.291	0.228	1.14	0.448	0.949	0.517	1.326	0.716	1.135	2.29	1.76	1.026		1.501	0.777	0.274	1.583
	0.365	0.52	0.742	0.678	1.163	0.419	1.746	1.091	0.74	2.064	0.94	2.028	1.472	1.607		0.419	0.847	1.228	0.39	0.608	0.725	2.807	0.571	2.87	1.613	0.93	0.752	1.271	1.294		0.922	0.88	0.708	1.183	1.789	0.71	1.169	0.589	0.502	1.187	1.387	1.548	1.46	1.029		1.05	0.394	0.735	1.347
	0.324	0.982	0.595	0.462	0.479	0.837	1.887	1.267	1.058	1.288	0.742	1.725	2.293	2.215		1.255	1.169	0.844	0.581	0.439	0.549	0.725	0.861	2.318	0.837	1.145	0.593	1.556	0.968		1.691	0.683	0.555	1.219	1.101	0.913	2.062	0.304	1.181	2.305	1.442	0.953	2.144	1.635		0.571	1.442	1.471	1.053
	0.721	0.555	0.848	0.484	1.503	0.832	2.144	1.744	1.068	1.602	0.896	1.78	1.491	1.532		1.596	0.564	0.479	1.084	1.829	1.053	1.776	0.304	2.07	0.904	1.521	0.953	1.395	0.678		0.905	0.595	0.616	0.476	1.361	0.639	1.543	1.072	0.832	1.39	2.408	2.096	0.297	1.385		1.322	1.269	0.41	1.174
	0.322	0.78	1.184	0.577	1.354	0.912	2.718	0.981	1.118	3.234	1.228	1.833	1.845	0.78		0.75	0.643	1.792	1.183	0.987	0.671	1.893	1.181	1.212	1.241	0.424	1.209	1.246	1.064		0.953	1.516	1.612	0.368	1.04	0.851	1.264	0.356	1.098	0.521	1.981	2.122	0.623	0.873		1.025	0.458	1.428	0.793
	0.581	0.465	0.735	1.042	1.276	1.163	0.942	1.072	1.054	1.361	0.488	2.169	2.272	1.385		0.505	0.88	1.316	0.388	0.577	0.868	2.138	0.288	2.625	1.204	0.537	0.753	1.074	1.113		0.563	0.462	0.646	0.388	1.134	0.574	0.649	0.759	1.14	0.716	3.046	1.69	1.082	2.197		0.838	0.78	0.368	1.292
	0.692	0.337	0.775	1.134	0.959	1.095	0.639	1.839	0.92	0.288	1.604	1.078	1.816	0.696		0.419	0.448	1.245	0.43	0.449	0.806	1.754	0.752	1.129	0.376	0.69	1.752	2.59	1.3		0.807	0.501	1.163	1.272	0.753	0.451	0.608	0.439	1.375	2.317	1.015	1.288	1.614	1.04		1.074	1.729	1.839	0.822
	0.838	0.419	1.424	1.104	0.9	0.484	2.026	1.136	1.054	0.68	1.119	1.764	0.75	1.078		0.608	0.779	2.037	0.408	2.011	1.234	1.428	0.448	0.529	1.219	1.113	0.837	1.397	0.349		1	1.388	0.775	0.652	1.28	1.408	1.097	0.868	1.851	1.306	1.67	1.069	1.234	0.361		1.471	1.013	0.759	2.193
	0.266	0.735	1.024	0.957	0.881	0.68	1.677	0.491	1.424	1.815	1.546	1.771	1.132	0.564		0.549	0.838	0.824	0.801	2.069	0.892	0.816	0.133	1.285	0.419	0.935	0.614	2.202	0.6		0.458	0.365	2.71	1.04	1.258	0.337	1.492	0.589	0.968	0.793	2.164	1.823	1.512	0.88		0.809	1.118	0.479	0.822
	0.488	0.394	0.838	0.708	0.51	0.71	1.551	0.648	0.966	2.34	0.649	1.982	2.73	0.817		0.376	0.64	0.69	0.897	0.319	0.329	2.116	1.211	2.148	1.064	1.3	0.725	0.753	2.628		0.6	0.857	0.388	1.732	0.465	0.456	0.626	0.448	1.693	1.168	0.919	2.301	1.647	1.451		1.428	1.458	0.52	1.87
	1.028	0.645	0.797	0.046	0.881	0.501	1.878	1.194	1.3	1.67	1.843	1.308	1.899	1.807		0.388	0.9	0.548	0.448	3.075	1.271	1.004	0.322	1.533	1.491	1.298	0.521	1.095	1.008		0.387	1.152	0.6	0.665	0.838	0.504	0.753	1	0.826	1.313	1.328	1.974	1.845	0.534		0.581	1.457	1.544	1.714
	0.865	0.897	0.665	0.735	1.933	1.025	1.987	1.025	1.273	1.995	1.364	1.916	1.371	1.494		0.329	0.43	0.394	0.608	2.373	0.47	1.187	1.457	1.756	0.917	1.558	1.284	1.748	0.775		0.297	0.812	0.318	1.002	1.961	0.765	2.138	1.528	1.279	1.108	0.808	0.759	1.053	1.368		1.442	1.616	1.857	1.216
	0.306	0.332	0.29	0.563	0.767	1.322	1.528	1.244	1.3	2.193	2.02	1.853	1.784	1.437		0.52	0.626	0.246	0.548	0.246	0.859	1.825	0.571	1.466	0.479	1.058	1.082	1.428	0.449		0.837	1.707	1	0.767	1.05	0.745	0.721	2.116	1.226	1.158	3.066	1.995	2.096	1.294		0.557	1.214	1.069	1.484
	0.541	0.665	1.204	0.695	1.292	1.143	1.533	1.119	2.026	1.744	0.937	1.505	1.632	1.472		0.501	0.922	0.975	0.501	3.626	0.502	1.866	1.482	0.838	1.018	1.278	0.905	0.952	0.593		1.28	0.775	0.871	0.832	1.078	0.707	0.787	0.612	1.254	1.646	1.771	2.071	1.622	0.52		1.072	1.56	0.453	0.742
	0.886	1.457	0.592	0.686	1.053	0.736	1.323	1.033	1.646	0.581	1.072	0.817	1.422	0.639		0.488	0.78	0.589	0.857	0.62	0.577	1.646	0.686	1.731	1.655	0.769	0.871	1.442	0.541		0.844	1.026	0.985	0.704	1.44	1.112	0.759	0.822	2.381	0.761	1.451	2.131	1.691	1.529		1.533	0.683	0.966	1.825
	1.156	0.504	0.288	0.822	1.762	1.54	1.71	1.48	1.283	1.058	0.854	1.933	1.496	0.505		0.484	0.392	0.695	0.549	0.913	1	0.368	1.388	1.108	0.922	1.214	1.258	1.156	4.243		0.753	0.26	0.841	2.043	1.764	0.322	1.295	2.007	2.193	0.479	1.733	3.193	0.807	0.665		0.368	1.081	1.563	0.829
	0.868	0.62	0.775	0.787	0.886	1.438	1.072	0.953	1.483	2.015	1.041	1.334	0.634	1.561		0.439	1.172	0.806	0.94	0.51	0.549	2.127	0.968	1.378	1.156	1.169	1.38	0.859	2.496		1.2	0.774	2.264	2.131	0.51	1.599	1.899	1.04	1.444	0.433	0.616	2.258	1.234	1.197		1.181	0.742	1.258	0.972
	0.752	0.905	1.259	0.399	0.649	0.41	1.226	1.519	0.716	0.877	0.735	1.343	1.551	1.676		0.332	0.626	0.593	0.91	0.646	0.581	4.324	0.484	1.614	1.809	1.168	0.871	0.69	1.56		0.909	0.949	0.769	1.665	1.271	1.096	1.792	0.517	0.649	0.47	1.819	3.156	0.949	1.364		0.89	1.391	0.521	0.297
	0.652	0.26	0.75	0.252	0.779	1.04	1.235	1.532	0.769	1.313	1.174	2.253	0.841	1.364		0.51	0.854	0.867	0.78	1.748	0.731	1.028	0.75	1.724	1.039	0.851	0.347	1.508	0.837		1.008	0.716	1.04	0.43	1.712	1.839	1.444	0.616	0.678	1.053	1.214	1.069	1.232	1.265		2.225	0.949	1.229	1.033
	0.233	0.26	0.52	0.39	0.975	0.525	1.457	1.001	1.856	0.847	1.623	0.857	1.211	0.89		0.216	0.534	0.779	0.479	0.807	1.284	0.937	0.479	1.959	1.372	1.326	1.122	0.838	0.616		1.304	0.534	1.211	0.376	3.161	0.908	1.685	0.491	1.734	1.053	1.099	0.376	1.942	1.968		0.525	1.024	1.832	0.479
	0.64	0.216	1.548	1.141	0.525	0.652	1.682	0.735	1.289	1.002	1.028	1.471	1.601	1.04		0.903	0.904	1.098	0.324	0.745	1.744	2.788	1.053	1.919	0.581	1.632	0.935	1.428	0.649		0.361	1.755	0.42	0.563	2.625	1.072	1.519	0.981	2.423	0.68	2.135	0.73	0.873	1.181		1.777	1.2	0.634	1.181
	0.623	0.635	0.258	1.02	0.777	0.798	1.575	1.356	0.465	0.574	0.349	1.136	1.551	1.129		0.548	0.904	0.616	1.588	0.806	0.665	0.942	0.753	0.913	0.989	2.367	0.399	1.003	0.552		0.877	0.923	1.35	0.886	0.725	0.408	0.589	0.612	0.593	3.41	1.837	0.43	0.683	0.448		1.586	1.548	0.968	2.644
	0.505	0.645	1.292	0.116	0.652	0.791	1.024	0.592	0.882	1.978	1.431	1.075	1.616	1.807		1.361	0.612	0.592	0.761	0.798	0.41	1.857	0.787	1.379	0.347	1.714	1.514	1.875	1.809		1.165	1.098	2.02	0.829	0.652	1.095	0.584	0.571	3.293	1.097	2.899	1.736	0.868	1.46		1	0.837	1.045	1.42
	0.549	0.361	0.806	0.274	0.822	1.69	0.777	0.584	1.313	1.588	0.841	0.99	0.816	1.098		0.939	0.581	1.2	1.129	0.43	0.652	1.291	1.502	1.342	1.113	1.161	0.798	0.957	1.467		2.348	0.502	1.503	0.532	1.145	0.548	0.868	1.3	1.279	1.129	1.74	1.872	0.826	1.028		1.347	1.521	1.744	0.097
	0.64	1.004	0.549	1.232	0.753	0.97	1.254	1.631	1.861	1.165	1.533	1.605	1.683	2.55		0.791	0.886	0.501	0.517	0.929	1.133	0.377	1.847	0.41	1.4	1.542	1.37	0.649	0.877		1.284	1.187	0.721	1.068	0.839	0.319	2.513	0.388	1.496	0.909	0.822	1.284	1.697	1.682		1.56	1.762	1.028	1.408
	0.529	0.388	1.197	0.745	1.437	0.394	0.612	1.284	1.558	1.564	0.962	0.944	1.158	0.97		0.798	0.671	0.635	1.158	1.33	0.949	1.847	1.967	1.557	0.716	1.04	1.161	0.376	0.653		1.575	0.347	0.859	1.564	1.615	0.9	2.24	1.5	0.755	0.648	1.347	0.448	2.581	1.737		1.294	0.892	0.42	1.628
	0.645	0.306	1.144	0.728	1.452	0.735	0.753	0.939	1.741	1.652	1.92	1.445	1.714	1.719		1.422	0.541	0.361	0.68	1.096	1.174	1.326	1.074	2.25	1.846	1.402	1.458	0.563	0.673		1.082	0.534	1.246	1.839	1.459	0.75	1.748	0.78	1.984	0.775	1.294	1.066	0.851	1.122		0.97	0.791	1.82	1.304
	0.981	0.491	0.871	0.903	1.551	0.577	1.204	0.388	1.424	1.14	1.417	2.132	1.432	0.683		1.05	1.449	0.52	0.555	1.082	1.042	0.634	0.643	0.873	1.065	1.838	1.258	1.393	2.091		0.476	1.942	0.908	0.537	1.469	0.355	0.824	1.573	2.075	1.296	0.585	1.258	2.24	2.054		1.347	1.098	2.062	1.214
	1.272	0.686	0.51	1.474	0.852	0.939	2.146	0.765	1.736	1.344	1.593	1.039	0.779	1.91		0.671	1.013	0.613	0.318	0.62	0.653	0.652	1.66	1.368	1.727	1.409	1.428	1.165	1.113		0.837	0.725	0.525	0.905	1.212	0.419	0.716	0.865	1.288	1.078	0.219	1.272	0.949	1.501		1.28	1.183	1.457	1.419
	0.592	0.937	0.892	1.132	1.449	0.529	0.673	0.235	1.174	1.691	0.852	1.158	0.608	1.451		0.493	0.894	0.488	0.484	0.233	0.838	1.347	1.013	1.31	1.154	1.702	0.707	1.347	0.548		0.696	1.194	0.47	0.898	0.839	0.516	0.767	0.408	0.822	0.616	0.599	1.097	1.489	0.623		1.04	0.361	0.868	0.648
	1.277	0.387	0.653	0.274	1.298	0.979	1.82	1.129	2.253	0.563	1.564	1.988	1.62	1.489		0.529	0.408	0.716	0.71	1.05	0.987	2.312	2.064	2.081	1.069	1.261	1.148	1.364	0.564		1.122	1.193	1.039	0.51	1.184	0.698	1.925	2.162	1.322	1.05	1.046	2.516	0.42	1.847		0.465	1.037	1.942	1.51
	0.62	0.505	0.822	0.563	1.942	1.347	1.987	0.832	2.058	1.102	1.98	1.252	1.942	0.981		0.822	0.745	0.581	0.877	1.097	2.006	1.144	0.504	2.279	0.861	0.97	1.082	1.415	0.712		0.62	0.859	0.721	1.267	1.245	0.388	1.766	0.492	1.324	1.008	2.779	1.228	1.306	1.047		0.673	0.595	0.549	0.394
	0.759	0.529	1.173	0.881	2.41	1.129	0.897	1.551	1.889	1.186	1.413	2.129	0.868	0.817		0.695	1.298	1.01	0.653	2.815	1.05	1.662	0.388	1.638	1.33	0.712	0.626	0.841	1.008		0.434	0.892	1.588	0.634	1.294	0.581	0.71	0.787	0.593	0.837	0.518	1.254	0.502	0.873		1.586	0.43	0.806	0.534
	0.616	0.448	0.525	1.264	1.887	0.484	0.571	0.534	1.731	1.387	1.66	1.682	1.529	1.354		1.214	1.004	0.68	0.807	1.575	0.677	0.908	1.181	1.378	0.949	0.937	0.873	0.276	1.375		0.957	0.532	1.136	0.731	2.789	0.39	0.439	0.616	0.829	1.073	2.048	0.581	0.987	1.053		1.165	1.098	1.612	1.327
	1.774	0.52	0.388	0.68	1.841	0.71	0.968	0.51	0.914	1.89	0.877	2.279	1.466	0.47		0.837	0.809	0.541	0.319	1.012	0.851	1.155	0.602	1.46	1.136	1.984	0.462	0.174	2.407		0.196	0.97	1.211	1.449	0.665	0.593	0.88	0.917	2.02	0.716	2.004	0.636	2.672	1.582		1.391	1.391	1.029	1.521
	0.62	0.404	0.376	0.716	1.487	0.918	1.277	0.408	1.008	1.346	0.94	2.039	0.892	0.692		0.246	1.549	0.832	0.745	1.539	0.394	1.326	1.471	1.962	1.111	1.17	0.433	1.923	0.852		0.387	0.838	2.308	0.408	0.767	1.457	0.678	0.636	2.163	0.725	1.222	3.408	0.832	0.873		0.413	0.806	2.116	0.462
	0.413	0.614	1.551	0.297	2.219	0.653	2.066	0.634	1.445	1.688	0.852	1.511	1.33	1.51		0.837	1.236	1.104	0.43	0.419	0.942	0.71	1.165	1.409	1.02	2.855	0.753	1.914	0.665		0.684	0.614	0.458	0.848	1.197	0.671	2.013	0.665	2.016	0.707	2.795	1	2.354	1.968		2.29	0.616	1.101	1.122
	1.62	0.476	0.922	0.707	1.536	0.361	0.51	0.962	0.822	2.193	1.432	2.236	1.118	1.151		0.392	0.904	0.534	1.29	0.837	1.645	2.73	0.944	1.356	1.101	1.298	0.68	2.005	0.827		0.837	2.009	0.47	0.552	0.453	0.581	1.924	0.266	1.347	2.901	0.775	1.141	2.348	1.144		0.822	2.034	0.841	1.132
	0.648	0.413	1.53	1.111	1.236	0.708	1.065	0.777	2.305	1.44	0.571	1.729	1.703	2.576		0.937	0.643	0.404	0.817	0.355	1.388	1.665	1.316	1.393	1.123	1.114	1.088	1.658	1.89		1.431	1.453	1.748	0.419	2.272	1.546	0.75	1.136	0.692	1.291	1.248	2.452	1.393	1.583		1.853	1.387	0.479	0.433
	1.04	0.42	0.484	0.844	1.028	1.455	1.3	0.753	1.634	1.361	0.806	1.892	2.132	1.528		1.214	0.798	0.404	1.438	0.595	1.065	1.901	1.012	2.147	0.851	1.095	0.748	0.456	1.125		1.212	0.71	1.417	1.924	1.335	0.266	0.937	1.189	1.102	2.004	0.561	0.306	0.207	0.78		0.924	1.607	0.488	1.417
	0.392	0.491	0.623	0.937	0.838	0.9	1.2	0.408	1.807	1.683	1.65	0.993	0.913	2.213		0.62	0.753	0.439	0.404	1.517	0.643	2.789	1.28	1.643	1.194	0.966	1.01	1.226	1.082		1.246	0.581	0.491	0.894	0.361	0.43	1.264	0.458	2.651	0.913	1.062	0.451	0.297	1.556		2.042	1.413	2.073	1.575
	0.91	0.949	0.548	0.665	0.548	1.039	1.669	0.769	1.216	0.725	0.606	1.265	0.817	1.224		0.929	1.041	1.214	0.689	1.408	0.595	0.551	0.613	0.742	0.798	2.519	1.271	1.326	1.573		0.534	0.695	0.996	0.801	1.004	1.387	2.346	1.807	1.948	1.457	0.822	1.723	1.097	1.52		0.752	1.252	0.822	0.613
	0.465	0.52	0.47	0.493	1.596	0.742	1.752	0.492	0.851	2.163	0.671	2.048	1.221	0.75		0.716	0.356	0.993	0.64	0.563	0.844	1.453	0.343	1.329	1.704	1.948	0.797	0.745	1.928		0.785	1.072	0.777	0.847	0.502	0.581	1.295	0.987	1.859	0.646	0.97	1.646	1.368	1.884		0.779	1.817	0.42	1.854
	0.64	0.555	0.913	1.219	0.399	0.683	1.72	1.968	1.977	1.961	0.456	1.455	1.279	1.385		0.571	0.548	1.111	1.273	0.356	1.638	0.798	0.877	1.693	1.161	1.04	0.814	1.524	2.1		1.771	1.389	0.493	1.548	1.095	0.347	2.071	1.05	0.361	0.577	1.92	1.87	0.548	0.775		0.847	1.269	0.753	1.516
	0.52	0.547	1.285	0.653	1.033	1.039	1.264	0.671	1.577	0.922	0.589	1.639	1.632	1.477		0.686	0.844	0.525	1.183	0.458	0.288	1.67	0.541	1.642	1.232	1.755	0.458	0.589	1.168		0.39	0.742	0.491	0.449	2.407	0.812	1.968	1.186	0.612	1.588	0.439	1.098	0.917	1.096		0.78	1.581	0.664	1.084
	1.859	1.393	0.808	0.62	1.516	1.045	3.049	1.437	1.075	1.252	1.724	2.109	1.471	1.693		0.968	0.525	0.662	0.479	0.684	1.542	1.03	0.881	1.209	1.246	1.596	0.584	1.269	1.008		0.448	0.318	1.714	0.306	0.759	0.266	1.419	1.018	2.202	0.981	1.465	0.93	0.993	1.529		1.241	0.678	1.688	2.041
	0.505	0.684	1.018	0.462	0.347	0.419	1.211	1.302	1.797	1.438	0.871	1.538	0.504	1.396		0.521	0.434	0.809	1.489	0.736	0.841	3.005	1.284	1.676	0.725	1.482	0.917	1.259	0.306		0.894	0.408	0.634	0.924	0.532	0.349	1.372	1.033	0.745	0.388	1.553	1.045	1.378	1.37		1.48	1.452	1.965	1.432
	1.254	0.532	1.05	0.913	0.742	1.129	1.259	1.174	1.932	1.053	1.372	1.442	1.764	0.972		0.361	0.709	0.41	1.025	1.033	1.088	2.042	0.707	0.896	1.821	0.433	0.822	0.376	0.981		0.923	0.549	2.222	0.949	1.226	0.439	0.392	0.606	2.239	1.245	0.243	1.56	1.125	0.851		1.295	1.88	1.499	1.486
	1.224	0.824	1.013	0.484	1.074	1.318	0.838	1.805	2.491	1.587	1.571	2.798	1.214	0.504		0.779	0.673	0.329	0.812	2.424	0.525	0.71	1.448	1.098	1.33	0.708	0.812	1.833	1.492		0.857	0.448	0.851	1.316	0.453	0.521	0.52	0.62	1.551	0.673	1.42	1.229	1.118	0.394		1.131	1.424	1.378	1.444
	0.479	1.194	1.44	0.394	1.749	1.461	2.037	1.484	0.539	1.658	1.241	1.739	1.583	1.204		0.767	0.548	0.322	0.841	3.396	0.394	2.232	0.484	1.745	1.485	1.935	0.571	0.678	1.277		0.848	1.163	1.743	1.719	1.444	0.252	1.999	0.664	0.549	0.806	1.814	1.4	1.729	1.56		0.952	0.748	1.575	0.491
	1.004	1.356	0.97	0.456	0.993	1.018	1.942	0.73	1.076	1.546	1.723	1.11	1.446	1.693		0.662	0.808	1.336	0.716	0.922	1.102	1.204	0.626	0.777	0.593	1.506	0.809	0.392	1.341		0.377	0.602	0.349	1.506	1.04	0.504	1.209	0.306	0.434	0.886	1.283	1.756	2.138	1.695		1.165	1.355	0.787	0.292
	0.721	0.399	0.868	0.731	1.214	1.061	1.378	0.985	0.966	0.865	1.861	2.354	1.607	1.409		0.593	0.937	0.277	0.678	1.755	0.608	1.724	0.612	1.462	1.295	2.453	1.372	0.525	0.555		0.753	0.304	0.462	0.949	1.573	0.68	1.444	1.053	0.976	0.829	1.91	2.525	2.352	1.86		0.787	0.838	1.165	0.829
	1.743	0.47	0.626	0.775	0.797	0.665	1.378	1.264	0.7	2.286	1.866	1.538	1.743	0.785		0.809	0.686	0.297	0.377	0.695	0.377	0.725	1.33	2.038	0.484	0.942	0.62	1.084	0.69		0.826	1.098	1.112	1.136	0.721	0.653	1.2	0.645	2.392	0.492	0.608	0.714	1.578	2.116		1.211	1.183	0.652	1.785
	1.422	1.096	1.018	1.041	1.346	1.256	1.194	0.636	2.193	1.438	1.313	1.549	1.989	0.761		0.584	0.549	0.361	0.394	0.29	0.68	2.492	1.474	1.683	1.619	2.613	0.97	0.721	0.671		0.924	0.571	0.551	0.752	1.172	2.081	1.567	1.041	2.442	0.456	1.648	0.42	1.351	1.236		1.259	1.491	0.838	0.904
	1.004	0.563	0.867	1.101	1.453	0.777	0.634	0.981	1.471	1.239	1.209	1.333	0.838	0.868		0.748	0.537	0.551	0.798	0.58	0.898	1.29	0.71	1.861	1.098	1.669	1.71	0.42	1.14		1.31	1.361	0.387	0.613	0.47	0.695	1.224	0.548	0.643	1.677	1.909	1.582	2.081	1.049		1.113	2.101	0.909	1.504
	0.868	0.439	1.391	1.533	0.877	0.868	0.801	0.824	1.531	2.47	2.05	1.265	0.69	0.394		0.453	0.549	0.841	1.544	1.273	0.563	0.817	0.39	1.068	1.041	2.206	1.355	1.428	2.433		0.479	0.867	0.94	0.439	0.94	1.859	0.649	0.361	1.081	0.857	1.612	2	1.87	0.368		1.482	0.343	0.73	0.329
	0.851	0.935	1.126	0.837	1.813	0.94	1.161	0.71	1.49	0.929	0.769	1.135	2.005	1.323		0.851	0.892	0.376	0.584	0.983	1.234	1.761	2.483	1.852	1.441	2.034	0.755	1.29	0.521		0.897	2.128	1.936	3.379	1.209	0.392	0.505	0.777	1.847	0.42	1.085	2.41	1.355	1.548		1.02	1.324	1.635	0.774
	0.838	0.886	1.008	0.616	1.102	0.439	2.487	1.39	1.25	1.195	1.469	0.735	1.302	0.979		0.88	0.809	0.297	0.71	0.854	1.417	1.084	0.614	2.082	1.305	1.276	1.256	2.163	0.387		0.704	0.433	2.156	0.626	2.685	0.868	0.51	0.404	2.623	0.816	0.74	0.678	0.517	1.521		3.507	2.013	1.573	0.525
	0.886	0.981	0.686	0.465	3.427	1.496	0.913	0.456	1.347	0.957	1.451	2.256	1.428	1.02		0.525	0.541	1.46	2.281	1.133	1.14	2.41	1.2	0.798	1.2	0.616	1.539	1.101	2.195		0.912	1.624	0.908	1.186	1.292	0.419	2.938	0.376	1.379	0.424	0.385	1.039	1.069	1.672		0.68	1.658	1.452	0.968
	0.532	0.646	0.434	0.745	0.962	0.917	1.601	1.204	1.673	0.809	1.103	0.219	1.505	1.893		1.013	0.571	1.227	1.161	1.588	1.307	0.52	0.68	1.306	0.571	0.716	1.947	1.058	1.361		1.561	0.635	0.648	0.643	0.949	1.343	1.245	1.746	1.278	0.462	1.768	1.613	0.721	0.673		0.987	1.37	1.825	0.707
	1.615	0.664	1.843	0.623	0.692	0.827	1.026	1.71	1.943	0.812	1.189	0.752	2.058	1.186		0.41	1.19	1.662	0.43	0.745	0.266	1.44	2.193	1.992	1.575	0.756	0.174	1.004	1.219		0.399	0.75	2.133	0.337	0.838	0.865	0.807	1.743	2.345	1.356	1.238	0.695	1.212	2.14		1.165	1.488	1.746	0.571
	0.43	1.53	0.504	0.608	0.479	1.108	1.236	0.355	1.579	0.297	1.246	0.981	1.438	1.034		0.501	0.613	0.68	0.504	2.122	0.228	1.709	0.577	1.512	0.871	0.549	0.456	0.571	0.929		0.276	0.505	1.356	0.759	1.03	0.714	0.896	0.636	1.226	1.012	3.16	1.879	0.785	1.209		0.683	1.408	0.551	0.894
	0.658	0.479	0.492	0.549	0.465	0.62	1.471	1.449	1.192	1.601	1.278	1.223	2.362	1.227		0.646	0.797	1.768	0.388	1.651	1.3	0.968	0.376	1.76	0.775	1.575	1.246	1.813	0.684		0.439	0.419	0.779	0.812	0.937	1.197	0.665	0.653	0.51	0.488	1.125	0.643	1.122	0.484		1.827	1.487	0.912	0.347
	0.62	0.462	0.488	0.608	1.583	0.903	1.193	0.643	1.196	1.058	0.748	1.678	1.002	1.061		0.735	0.462	1.375	0.877	1.258	0.347	0.574	1.575	1.91	1.154	1.764	1.442	1.258	0.742		0.361	0.448	1.254	0.439	2.158	0.47	0.912	0.462	1.484	2.917	1.4	0.555	0.324	0.939		2.943	0.686	1.346	0.742
	0.968	0.903	0.47	1.239	0.505	1.458	1.226	0.716	1.125	0.52	1.557	2.004	0.917	1.482		1.025	1.081	0.648	0.563	1.103	0.767	0.643	0.304	1.438	1.592	1.31	0.525	0.822	1.367		0.671	0.844	0.844	0.97	1.825	0.548	1.524	0.376	1.328	1.56	2.708	1.83	1.194	1.332		1.327	1.597	0.775	1.426
	0.801	1.163	0.571	0.595	0.525	0.827	1.933	1.521	1.52	0.6	1.417	0.864	1.095	1.437		1.588	1.003	0.983	0.462	0.736	0.745	0.532	1.417	1.731	1.839	0.47	0.871	1.229	0.532		0.456	0.476	1.573	1.103	2.192	0.297	0.829	0.563	0.908	0.581	1.424	1.516	0.777	1.097		0.42	1.824	2.093	0.793
	0.714	0.521	1.084	0.959	1.402	0.859	1.54	1.952	1.218	1.065	1.276	0.993	0.975	0.868		0.806	1.133	0.388	0.851	1.226	1.14	0.626	0.532	1.516	1.28	1.161	0.892	0.809	0.451		0.581	0.516	1.128	0.649	1.63	2.132	0.861	0.404	1.619	0.684	1.621	0.368	0.935	2.295		1.69	1.033	0.844	1.119
	1.217	0.549	0.962	1.095	1.343	0.728	1.143	0.658	1.29	1.375	1.012	1.131	1.212	1.487		0.88	0.399	0.785	0.377	1.239	0.491	1.591	0.686	1.864	1.683	1.181	0.521	0.635	0.394		2.11	0.742	1.232	1.232	1.461	0.434	0.765	0.581	1.804	1.163	0.68	0.873	0.745	0.857		1.323	0.356	0.949	0.851
	1.271	0.548	0.616	1.082	0.571	0.502	1.072	1.226	2.294	1.876	1.98	1.247	1.847	1.438		0.462	1.012	0.377	0.912	0.548	1.347	1.676	0.62	1.19	1.516	2.263	0.64	1.496	0.968		0.742	0.453	0.529	1.254	1.449	0.324	0.639	1.01	1.428	1.112	0.966	1.432	0.822	1.635		2.044	0.62	2.403	1.677
	0.94	0.555	0.949	0.584	0.996	0.976	0.525	1.575	1.565	0.775	1.655	0.503	1.976	1.002		0.837	0.753	0.343	0.347	1.643	0.841	0.563	0.959	1.04	0.91	1.82	0.549	1.29	0.377		0.73	0.52	0.571	0.388	3.213	0.388	1.557	0.931	2.109	1.02	1.347	1.14	1.989	1.46		1.209	1.71	0.595	1.322
	1.29	0.684	1.455	1.278	1.472	1.205	0.886	0.516	1.23	1.068	1.013	1.198	0.981	1.484		0.731	0.492	0.581	1.172	0.6	0.451	1.028	1.697	1.33	1.399	1.226	1.411	0.735	1.53		0.665	0.361	0.361	0.634	1.241	0.664	2.258	1.419	1	0.808	1.61	0.343	1.295	1.432		1.306	0.322	0.368	1.731
	1.091	0.593	0.462	1.068	1.264	1.387	0.807	0.759	2.227	2.326	1.714	1.411	3.128	1.437		1.002	0.949	0.368	0.917	0.837	0.368	1.644	0.462	2.539	1.119	0.563	2.042	0.485	1.04		0.721	0.993	0.857	0.29	0.288	0.671	1.795	1.755	1.008	0.388	2.295	1.906	1.123	0.52		0.962	1.761	0.504	1.356
	1.033	0.616	0.695	1.053	1.369	0.929	0.887	0.648	1.851	1.347	1.624	1.857	1.442	1.817		0.541	0.808	0.537	1.408	0.841	0.774	1.091	0.73	1.597	0.58	1.145	1	1.459	0.913		0.62	1.646	0.485	1.656	0.549	1.111	0.949	0.844	2.132	0.356	1.814	1.208	1.48	0.962		0.755	1.596	1.575	1.01
	1.255	1.31	1.013	0.775	1.426	0.871	0.894	1.278	1.075	0.62	0.93	1.387	2.124	0.616		1.012	0.671	0.623	0.649	1.869	0.462	1.024	1.084	1.356	0.806	1.871	0.785	1.113	0.953		1.148	0.949	0.297	0.449	2.947	0.491	0.857	0.593	0.537	0.413	1.515	1.914	0.918	1.269		0.886	1.269	0.458	1.697
	0.652	1.44	0.877	0.376	0.62	0.683	0.832	1.305	1.289	0.479	1.393	0.574	0.653	1.039		2.228	0.484		0.388	1.355	1.97	1.524	0.548	1.702	0.769	0.742	1.224	0.424	1.984		0.935	1.259	0.306	0.492	1.471	0.266	1.851	1.832	1	0.653	1.733	0.399	1.269	0.851		0.959	0.892	0.318	1.359
	0.775	0.716	0.462	1.487	1.505	1.096	1.98	0.983	1.308	1.469	1.644	1.833	1.471	1.228		0.847	0.89		0.822	1.532	1.068	1.097	0.987	1.252	1.619	0.678	0.774	1.012	1.128		0.306	0.377	0.451	0.645	0.822	0.584	0.787	1.02	2.767	1.739	1.064	2.096	0.64	2.242		1.968	1.425	1.108	0.832
	0.725	0.807	0.897	0.493	1.217	0.968	0.877	1.388	1.431	0.297	1.347	1.493	1.917	0.959		0.356	0.704		1.588	0.581	0.841	0.958	1.244	1.385	1.615	1.029	0.541	1.004	1.678		0.968	0.462	2.013	0.975	2.098	0.759	3.023	0.692	1.767	0.266	1.755	1.556	0.595	1.209		1.056	0.979	0.449	0.877
	0.908	0.462	0.408	1.614	0.501	0.434	0.759	1.628	1.731	2.077	1.929	1.861	0.491	1.581		0.563	0.571		0.488	1.469	1.183	1.551	0.606	1.058	1.538	1.572	0.564	1.697	1.002		0.571	1.628	0.616	0.458	1.961	1.581	1.326	0.595	0.548	1.126	1.135	1.93	1.484	0.664		1.658	1.3	1.559	1.754
	0.51	0.465	0.266	0.347	0.404	0.551	0.904	0.868	1.849	0.646	1.588	1.432	2.219	1.662		0.806	0.349		0.557	0.347	1.217	1.432	0.745	1.597	1.29	1.197	1.432	2.174	1.136		1.778	0.376	0.827	1.908	1.71	1.072	0.462	0.491	1.389	0.658	0.736	3.005	0.653	1.525		1.369	0.68	0.781	2.352
	0.649	0.756	1.378	1.108	2.51	0.552	1.781	0.71	1.586	1.737	0.968	2.375	1.757	0.648		0.652	0.318		1.544	1.792	1.51	1.112	0.439	1.097	0.377	1.405	0.388	1.198	0.787		0.555	0.26	0.394	0.52	0.41	0.708	0.981	0.716	0.861	1.666	0.981	1.897	0.453	1.425		1.118	1.226	0.368	1.096
	0.69	0.501	0.399	0.548	2.354	1.097	1.053	0.871	2.171	1.602	1.169	0.769	1.245	0.822		0.548	1.163		1.635	1.163	0.204	1.588	0.904	1.04	1.256	2.001	1.072	0.716	0.753		1.618	0.552	0.534	0.581	0.684	1.633	0.377	0.777	1.165	0.563	0.327	1.546	2.066	1.102		0.658	0.767	1.065	1.574
	0.589	0.851	0.897	0.972	0.871	0.887	0.626	0.832	1.551	1.387	1.332	0.735	1.081	2.172		0.564	0.716		0.491	1.284	1.297	1.56	1.278	1.29	0.923	0.989	0.827	0.534	0.692		0.584	0.376	0.377	1.899	1.397	0.492	1.096	0.485	1.82	1.521	0.532	1.98	1.356	0.937		1.025	2.024	1.273	1.416
	0.52	0.6	1.425	1.487	1.784	0.981	1.306	0.898	1.198	1.072	1.049	1.252	1.678	1.361		0.551	0.652		0.388	0.857	1.71	1.298	0.848	1.665	0.797	1.33	1.378	1.054	1.665		0.439	0.908	1.887	0.664	1.781	0.413	2.1	1.068	0.541	0.857	1.794	0.868	1.145	1.033		0.549	1.909	2.37	0.537
	0.807	0.581	0.785	0.942	0.332	0.721	1.193	0.306	1.511	1.378	0.949	1.075	0.581	1.774		0.552	0.639		0.775	0.347	1.033	1.714	0.484	1.426	0.41	1.378	0.484	0.808	0.266		2.109	0.574	0.525	0.304	0.563	1.703	1.994	1.683	2.14	0.521	0.566	1.356	1.516	1.343		0.721	1.168	2.201	1.775
	0.645	0.742	1.096	1.816	1.551	1.323	1.774	1.145	1.293	1.863	1.169	1.062	1.072	1.37		0.337	2.488		0.912	0.602	1.184	1.186	0.993	2.003	1.351	0.658	1.012	1.323	0.829		1.002	0.645	1.272	0.297	1.776	0.337	0.606	0.62	1.899	0.51	3.096	1.477	1.108	0.949		1.385	2.001	1.172	0.592
	0.574	0.686	1.284	1	1.576	1.316	1.387	0.608	2.407	0.847	1.457	2.616	1.39	1.477		0.777	0.735		0.648	1.572	0.636	3.936	0.71	2.012	0.643	1.068	1.013	0.886	0.665		1.073	0.529	0.871	0.809	1.714	0.595	0.612	1.688	1.516	0.493	0.604	2.372	0.806	1.717		1.548	1.098	0.571	1.469
	1.471	0.662	0.837	1.216	2.999	0.88	0.677	1.053	2.581	1.978	1.645	1.147	1.204	0.581		0.623	0.653		0.793	0.808	1.734	2.521	1.123	1.333	0.774	0.555	1.204	1.746	0.408		1.797	0.868	0.64	1.141	0.798	0.39	1.231	0.689	0.821	0.581	0.304	1.51	1.76	0.809		1.379	1.356	0.64	0.887
	0.968	0.854	0.616	1.732	0.356	0.892	0.97	0.996	0.95	1.572	1.428	1.265	1.76	0.94		0.917	0.935		1.133	1.295	0.89	1.258	1.718	1.622	0.608	0.707	0.673	1.676	0.721		0.806	0.433	1	1.008	1.712	0.451	1.693	0.942	1.648	0.525	2.24	0.377	0.852	1.346		1.904	1.749	0.968	1.612
	0.71	0.721	1.482	0.491	0.602	0.847	1.174	1.389	1.296	0.704	1.583	2.365	1.656	1.522		0.52	0.826		0.448	1.033	0.981	0.886	1.607	1.168	0.52	1.131	0.775	1.426	0.725		1.193	0.42	0.735	1.53	2.367	2.193	0.492	0.541	0.581	0.809	1.181	1.72	0.735	2.001		1.228	0.581	0.589	1.614
	0.678	0.448	0.779	0.912	1.272	0.908	0.448	1.145	1.607	2.096	1.848	1.592	2.309	1.451		0.516	0.488			0.721	1.012	1.316	1.789	1.737	1.096	0.39	1.054	2.071	0.433		0.929	0.387	0.665	0.419	1.19	0.41	0.332	0.712	0.645	0.686	1.106	2.325	1.261	0.684		1.292	1.226	1.168	1.226
	1.029	0.887	0.809	0.97	1.813	1.326	0.636	1.163	1.471	0.894	1.385	1.442	1.323	1.48		0.564	0.936			0.534	1.4	0.652	1.948	0.404	2.02	0.581	1.364	0.939	1.548		0.52	0.822	0.71	1.952	1.183	0.505	0.235	1.419	1.415	0.584	2.324	0.898	1.583	0.71		1.068	1.236	2.122	1.893
	0.589	0.801	1.69	0.731	1.136	0.589	1.48	0.798	0.651	1.326	1.096	1.954	2.001	0.761		0.479	0.47			1.347	0.549	3.39	1.103	1.809	0.626	0.584	1.426	0.959	1.278		0.304	0.892	0.777	0.931	1.558	1.154	1.56	0.458	1.428	0.233	1.118	0.541	1.551	2.126		0.88	1.438	1.072	1.581
	0.491	1.05	1.184	1.46	1.724	0.51	1.31	1.899	1.003	1.265	1.347	2.286	0.807	1.743		0.897	0.551			1.524	0.368	1.887	0.476	1.602	0.664	1.33	1.01	1.255	0.68		0.456	0.329	0.665	0.456	0.69	1.033	0.555	0.589	1.012	0.955	1.335	0.892	1.851	1.418		1.462	1.518	1.068	0.649
	1.372	0.822	0.492	1.341	0.484	1.709	1.193	1.004	2.23	1.42	1.066	1.789	1.472	0.975		0.368	0.41			1.56	1.072	0.847	1.612	2.549	0.981	0.649	1.126	0.484	0.908		1.284	0.996	0.595	0.548	0.574	0.735	0.589	0.775	1.449	1.457	0.943	0.484	1.336	1.743		0.736	1.662	0.996	1.532
	0.235	0.652	0.937	0.376	1.682	0.861	1.474	1.065	2.472	1.183	1.616	1.746	1.612	1.843		0.636	0.695			0.525	0.62	1.897	0.684	1.784	0.759	2.066	0.602	1.572	1.084		0.652	0.525	0.51	1.226	1.004	1.306	1.38	0.678	1.673	1.564	0.463	0.388	1.623	2.132		1.781	1.226	0.829	0.492
	0.492	1.194	0.777	0.742	1.665	0.837	1.632	1.33	1.5	1.825	1.347	2.231	1.628	2.042		0.388	0.297			1.148	0.707	1.784	0.728	1.234	0.939	1.342	1.361	0.987	1.058		0.822	1.161	1.372	1.001	0.288	0.614	1.128	1.097	1.521	2.44	1.961	0.319	1.799	1.775		2.797	0.6	1.326	0.51
	1.264	0.574	0.809	0.97	1.583	0.912	2.613	1.372	1.736	1.408	1.234	1.385	0.714	0.525		0.501	0.368			1.872	0.571	0.593	0.684	1.854	1.097	1.025	0.68	1.467	0.832		0.774	0.838	0.399	0.712	0.612	1.197	0.602	0.39	1.161	0.349	1.088	2.732	2.264	0.904		1.256		0.653	1.136
	0.955	0.387	1.326	0.6	1.561	1.126	1.789	1.29	2.04	2.348	1.718	1.763	1.356	0.742		0.614	1.072			0.439	0.343	1.186	1.396	1.484	1	1.278	1.246	1.14	1		1.058	0.755	0.41	0.297	1.028		0.532	1.355	1.095	0.653	1.565	0.226	1.163	1.484		0.69		2.288	1.254
	0.97	0.707	1.002	0.809	1.033	0.388	1.236	0.798	0.822	1.193	1.612	2.013	1.866	1.683		0.606	0.392			0.517	1.524	0.696	1.605	1.444	0.52	1.217	0.525	2.033	0.922		0.737	0.712	1.964	1.198	0.462		2.73	2.877	0.838	1.368	1.034	1.977	1.628	1.125		1.627		0.433	2.005
	0.868	0.735	0.962	0.207	0.923	0.909	1.521	1.095	0.904	0.871	0.439	2.19	1.396	1.499		0.595				0.806	1.104	2.639	1.458	1.742	0.877	0.404	0.987	0.551	0.877		1.602	0.361	0.448	1.342	1.356		0.807	0.707	1.065	1.33	1.17	1.876	2.129	0.665		0.408		0.635	2.091
	0.745	1.467	0.485	0.226	1.432	0.944	1.323	0.844	0.981	0.252	2.167	1.377	1.601	0.537		0.695				0.985	1.396	1.361	1.172	1.994	1.411	0.485	0.868	0.174	1.118		0.775	0.484	0.887	0.318	3.05		0.673	0.361	1.677	1.096	2.236	1.42	1.573	2.335		0.645		0.439	0.785
	1.088	0.42	0.837	0.439	1.528	1.31	1.19	0.714	2.245	1.989	1.258	0.99	1.128	1.039		0.549				1.551	1.258	2.911	0.297	1.836	1.272	0.623	0.735	1.432	1.564		0.71	0.39	0.623	0.449	1.084		0.465	0.797	1.373	0.6	2.352	2.054	0.68	1.395		0.612		0.387	1.581
	1.072	0.686	0.42	0.935	0.47	0.658	2.089	0.894	1.158	1.469	1.288	1.27	1.985	1.781		0.774				0.501	0.549	0.777	0.458	1.871	0.484	2.451	0.97	1.464	0.678		0.704	0.592	0.616	0.678	0.904		1.428	0.413	1.935	0.408	1.4	1.236	1.846	2.326		0.913		0.653	0.996
	1.047	0.996	0.777	0.541	1.623	0.91	1.209	1.788	1.404	1.613	1.161	1.135	2.587	0.742		0.51				1.682	0.683	0.424	1.096	1.746	1.635	1.72	0.881	0.42	0.658		1.467	0.677	0.876	0.388	0.753		0.824	0.593	1.749	0.781	0.911	2.258	1.673	2.348		0.645		1.234	2.222
	0.612	0.89	1.567	0.678	1.307	0.972	0.841	1.781	0.658	1.38	0.399	1.096	1.259	1.72		0.593				1.645	0.959	0.89	0.664	1.521	1.575	1.004	0.707	0.612	0.274		0.777	0.226	2.536	0.329	0.756		0.449	0.297	1.843	1.326	1.935	1.583	1.551	0.968		0.728		1.533	1.905
	0.592	0.809	1.039	1.316	0.777	0.71	0.936	1.003	1.877	1.466	1.4	1.807	0.563	1.643		0.387				1.261	0.935	1.871	1.289	0.806	1.003	1.402	1.126	1.792	1.464		1.861		0.626	0.979	1.44		1.548	0.767	0.484	0.968	1.527	2.428	0.755	0.355		0.484		2.233	0.937
	1.197	1.119	0.658	0.809	1.824	1.061	1.587	1.102	0.559	1.454	1.409	1.773	0.449	1.417		0.493				0.725	0.646	1.916	0.854	0.851	1.582	1.961	0.841	1.205	1.285		1.723		0.774	0.439	1.258		0.491	1.061	1.821	0.322	0.877	1.852	0.93	0.806		1.98		1.209	2.096
	0.505	0.708	0.89	0.812	0.822	0.716	1.635	0.698	1	1.338	2.106	1.325	0.602	1.469		0.955				1.444	0.488	0.94	0.392	1.2	0.989	1.228	0.71	1.677	0.73		1.118		0.434	0.439	1.226		0.652	0.677	0.745	0.704	0.886	2.372	1.344	1.678		1.001		0.68	1.19
	0.817	1.068	1.042	0.809	2.497	0.577	1.739	0.962	0.947	1.918	1.378	1.033	0.798	0.304		0.589				2.594	1.544	1.971	1.256	1.852	1.212	1.214	1.097	1.096	0.228		1.259		1.05	1.378	0.806		0.62	0.698	1.302	0.731	1.909	0.993	0.798	0.968		0.781		0.322	1.826
	1.145	1.227	1.163	0.525	0.68	1.228	0.854	0.987	1.319	1.691	2.106	1.632	1.073	0.678		0.404				1.254	0.777	1.781	1.209	1.913	0.922	1.717	1.553	0.844	0.837		0.721		1.095	0.413	1.648		1.571	0.737	0.868	1.234	1.265	0.485	1.91	0.689		0.952		1.471	1.98
	0.716	0.653	0.595	0.51	1.709	0.626	1.068	2.183	1.27	2.106	1.489	1.325	1.025	1.875		0.649				0.981	0.755	1.226	1.342	1.38	0.551	1.688	0.841	1.688	0.563		0.761		1.628	0.376	0.653		0.6	1.268	0.458	1.56	1.29	0.873	1.517	1.284		0.785		0.886	1.128
	0.806	0.968	1.428	0.868	1.096	1.368	1.4	0.887	2.001	0.258	1.012	1.768	1.065	0.989		0.62				0.873	1.563	0.683	1.235	1.119	0.419	0.595	0.662	0.904	1.174		1.084		1.02	0.484	0.716		0.737	0.51	2	0.517	0.914	1.644	1.324	1.55		0.725		0.898	1.129
	0.684	0.975	1.084	2.159	0.816	0.399	1.521	1.165	1.174	1.832	1.152	1.808	1.548	1.049		0.962				1.644	1.755	1.395	0.276	1.119	0.671	1.028	0.761	0.728	1.276		0.492		0.735	0.368	0.51		0.319	0.574	2.292	0.133	1.334	0.88	0.832	1.096		1.789		0.839	1.261
	0.854	0.571	0.761	0.698	2.949	0.449	1.638	0.635	1.181	2.185	1.396	1.904	1.87	2.036		0.653				2.967	0.865	1.653	0.408	1.914	0.577	1.38	0.571	1.596	1.037		1.012		1.169	1.742	0.979		0.43	2.258	2.011	0.826	0.449	1.14	1.529	0.6		1.913		1.259	1.949
	0.791	0.408	1.367	0.51	1.451	1.596	0.949	1.569	0.672	1.393	1.163	2.1	1.727	2.481		1.065				1.519	0.485	1.5	0.593	1.198	0.88	1.254	0.593	1.405	1.673		0.683		2.091	0.595	0.537		2.02	0.349	0.996	1.235	1.935	1.824	1.827	1.234		1.018		0.616	1.458
	0.516	1.04	1.452	1.198	0.534	1.573	0.989	1.52	1.465	1.14	1.103	2.328	0.976	1.193		0.753				0.75	0.433	0.581	0.439	1.567	0.329	1.977	0.822	1.01	1.464		0.449		0.322	0.824	0.216		0.707	0.563	2.108	1.14	1.72	0.824	1.757	0.937		1.326		0.347	1.316
	0.47	0.847	1.076	0.75	2.273	1.156	1.785	1.197	1.66	1.415	1.204	1.367	1.61	0.552						1.254	1.393	0.449	1.073	1.416	0.456	0.377	0.873	0.975	0.97		0.388		0.462	0.439	0.635		1.284	0.71	1.143	0.769	2.034	1.503	2.106	0.623		1.008		1.245	0.548
	0.322	1.02	1.212	1.143	1.714	0.923	2.108	1.3	0.822	0.62	1.948	1.851	2.581	0.854						1.128	1.528	2.204	0.306	1.183	1.415	0.775	0.643	1.702	0.368		0.491		0.857	0.968	0.564		1.097	0.571	1.354	0.827	1.569	2.081	1.688	0.957		1.623		1.785	1.354
	0.39	0.904	1.098	0.42	1.51	1.438	2.669	0.775	1.465	0.993	2.215	1.72	2.168	1.008						0.433		0.924	0.904	2.03	0.549	0.484	0.707	0.912	0.665		0.725		0.368	0.826	0.404		2.928	0.809	2.066	0.761	3.595	2.165	1.025	0.908		1.226		0.765	0.62
	0.39	0.581	0.616	0.479	0.968	1.2	0.571	0.826	1.432	1.347	1.292	1.062	1.91	1.893						2.336		0.646	1.551	1.141	1.33	1.295	1.066	0.94	1.402		0.337		0.592	1.102	0.329		2.712	0.563	1.322	1.491	2.176	2.946	0.892	1.471		0.769		0.652	1.001
	1.323	0.465	0.548	0.671	1.133	0.981	2.685	0.525	1.195	1.103	2.284	2.308	2.232	2.031						1.177		1.551	1.396	1.419	0.868	0.952	1.688	1.097	1.347		1.228		0.41	0.634	0.355		2.395	0.551	0.608	0.595	0.761	1.683	1.52	1.764		1.82		0.361	0.937
	1.39	0.504	0.521	0.877	1.516	1.136	0.634	0.557	1.885	2.126	1.632	1.945	0.837	1.368								1.832	0.484	1.714	1.209	0.775	0.868	1.918	0.649		0.532		0.277	1.947	0.807		2.065	1.33	0.787	1.413	0.532	0.742	0.318	1.58		1.145		0.216	1.305
	0.549	0.917	0.696	1.3	1.644	0.52	0.662	0.716	2.494	1.04	0.868	1.51	1.92	1.136								1.797	0.399	1.344	0.924	1.69	0.876	1.033	0.868		0.368		1.71	1.466	0.867		2.225	1.084	1.039		0.7	1.119	2.165	0.923		1.369		1.143	1.29
	0.648	0.71	1.053	0.52	2.417	0.608	0.71	0.913	1.612	0.806	1.896	0.762	3.104	0.419								2.408	1.909	0.904	0.912	0.857	0.841	2.066	1.118		0.581		0.555	0.781	0.791		1.14	1.484	1.557		1.847	3.126	0.678	1.457		2.631		0.399	0.453
	1.717	0.731	0.868	0.645	2.356	1.197	1.292	1.298	1.388	1.469	1.136	1.855	1.789	2.194								1.316	0.581	1.519	0.677	1.273	0.962	1.258	1.462		0.433		1.068	0.753	2.877		0.39	1.229	1.818		0.693	1.875	1.601	1.455		1.444		0.671	1.197
	0.844	0.623	0.368	0.917	1.489	0.557	0.817	1.4	1.022	1.551	1.332	0.793	1.002	0.841								1.857	0.736	1.112	1.174	0.593	0.707	1.294	1.194		0.479		0.521	1.977	0.737		0.648	0.728	0.935		0.673	2.403	1.065	2.219		2.064		0.982	0.571
	0.826	0.665	1.095	0.434	1.361	0.347	0.529	0.91	1.697	1.697	1.94	2.058	0.434	1.241								0.832	1.356	1.753	0.584	0.51	0.787	1.04	0.777		0.88		0.361	0.419	1.081		0.777	0.645	1.593		1.515	0.557	1.676	0.639		0.936		0.761	0.797
	0.807	0.673	1.228	0.826	0.962	0.725	1.356	2.036	1.857	1.558	1.484	1.973	1.588	2.006								2.295	2.176	1.746	1.48	0.71	1.261	0.886	1.076		1.204		2.413	0.532	1.041		2.529	0.555	2.013			1.123	0.981	0.728		1.04		0.71	1.559
	0.577	0.78	1.304	0.549	0.505	1.158	1.037	0.892	1.419	1.209	1.047	1.455	0.983	1.389								2.048	0.801	0.708	0.564	1.195	1.613	1.189	0.912		0.636		0.361		1.136		1.103	1.893	1.411			2.012	1.02	0.517		1.133		1.118	1.813
	0.725	0.525	1.102	1.396	0.957	0.673	0.419	0.492	2.439	1.072	1.487	2.152	1.144	1.354								4.155	1.285	1.161	0.64	1.391	0.847	0.838	1.285		1.236		0.671		0.806		1.066	0.753	0.226			2.065	0.806	0.349		1.628		0.658	0.908
	1.553	0.658	0.485	0.589	3.319	0.692	1.35	1.131	1.814	0.376	1.361	1.265	1.522	0.571								2.628	0.394	0.791	1.326	0.777	0.742	1.169	0.728		1.058		0.678		0.646		0.88	1.082	2.015			1.825	1.169	2.286				2.744	0.742
	0.806	0.987	0.908	0.349	1.506	0.306	1.214	0.52	1.158	1.284	1.101	1.605	1.02	0.692								1.428	0.917	1.025	0.745	1.342	0.71	1.012	1.582		1.239		0.51		0.318		1.186	0.68	1.008			1.347	1.259	1.264				2.03	1.05
	0.564	0.292	0.592	1.234	1.33	0.29	0.608	0.26	1.591	1.529	1.683	1.462	1.072	1.872								0.753	1.034	1	1.373	0.993	1.588	1.706	0.297		0.922		0.822		0.774		2.465	0.797	2.291			0.399	1.264	1.815				0.636	1.056
	1.241	1.097	1.05	1.29	1.104	1.069	2.692	0.62	0.989	1.692	1.624	1.916	1.601	1.169								1.875	0.975	1.261	0.645	0.479	1.097	2.011	1.347		0.62		0.894		2.619		1.367	2.038	1.04				1.501	1.411				0.626	1.194
	0.613	1.012	1.186	0.525	0.636	0.593	2.005	2.051	1.565	0.306	1.487	1.216	1.169	1.683								1.144	1.239	1.169	0.785	1.815	0.707		0.288		1.068		0.517		0.871		2.193	1.835	1.418				1.97	1.489				1.871	1.096
	0.844	0.394	1.359	0.525	1.87	0.871	1.013	1.372	1.377	1.409	1.707	1.857	1.673	1.438								0.584	1.826	0.504	0.698	1.19	1.588		1.064						1.161		1.986	0.525	1.324				0.841	1.89				0.9	1.977
	0.649	1.323	0.798	0.413	0.809	1.487	0.658	1.095	0.762	1.378	1.884	2.451	1.409	1.466								1.677	1.496	0.848	0.892	1.076	1.425		0.387						0.937		0.451	0.753					1.644	1.437				0.361	2.151
	0.798	0.635	0.809	0.479	2.064	0.58	1.278	0.867	1.411	0.529	1.774	1.217	2.079	0.304								0.484	1.195	0.623	0.534	0.504	0.388		0.388						0.704		0.529	1.245					1.755	2.064				0.807	0.73
	1.458	0.589	0.937	0.349	2.777	0.88	0.736	0.89	1.661	1.444	2.347	1.506	1.669	1.488									1.71	1.143	1.919	1.619	1.025		0.318						1.183		0.737	1.02					1.018	0.404				0.433	0.952
	0.752	0.725	1.026	0.304	0.698	0.692	1.226	1.621	0.668	0.665	1.261	0.775	1.264	1.032									0.982	0.822	0.636	0.826	0.844		0.571						0.408		0.952	1.11					0.6	1.573				0.532	1.198
	0.745	0.485	1.347	0.449		1.31	1.632	0.707	1.385	1.627	1.104	1.336	0.451	0.408									0.462	1.88	0.71	1.001	1.033		0.908						1.413		1.987	0.976					1.733	1.065					0.735
	0.797	1.364	1.245	0.361		0.577	1.432	1.457	1.865	1.078	1.748	1.145	0.504	1.532									0.42	1.627	1.068	1.163	1.208		0.929						0.645		1.839	1.084					1.569	1.852					0.484
	0.71	1.217	1.155	0.424		0.26	1.559	1.347	1.291	1.775	1.533	1.327	1.018	1.936									1.359	0.708	1.359	1.239	0.648		1.338						0.787		0.877	0.324					0.844	1.83					1.096
	1.256	1.032	0.725	1.487		1.583	2.169	0.64	1.525	1.624	1.216	1.294	1.347	0.71									1.025	0.742	0.505	0.821	0.589		0.532						0.349		0.873	1.653					0.91	1.347					1.504
	0.78	0.51	0.555	0.94		1.197	1.519	1.521	1.569	0.725	1.072	2.423	0.388	0.822									0.485	1.026	0.841	1.255	0.923		0.852						2.277		1.369	0.841					0.673	1.567					1.169
	0.959	0.924	0.456	0.979		1.393	1.539	0.551	1.387	1.126	1.817	0.847	1.95	1.013									0.42	1.645	0.608	1.068	0.683		0.492						2.976		2.487	1.156					0.677	1.841					1.91
	0.708	1.256	0.996	0.516		1.037	1.784	0.769	1.808	0.993	1.892	1.36	0.924	0.665									0.356	0.332	0.844	1.2	0.806		0.852						0.504		0.686	0.449					1.474	1.781					1.101
	0.904	0.775	1.101	0.981		0.465	0.51	0.684	1.995	1.239	1.174	0.709	1.859	1.008										1.894	1.229	1.186	0.525		0.449						1.324		0.636	1.601					0.756	1.14					0.937
	0.504	0.548	0.376	0.505		0.69	1.519	0.695	1.619	0.917	0.877	1.78	0.571	1.04										1.532	1.811	1.46	0.707		1.14						1.516		0.246	1.258					1.428	1.129					1.918
	0.62	1.229	0.42	0.972		1.341	1.174	0.51	1.041	1.008	0.953	1.256	0.949	0.767										0.433	0.824	2.469	0.996		0.775						0.476		0.589	0.841					1.995	1.528					0.68
	0.761	1.061	0.917	0.801		1.419	0.797	1.261	0.301	1.074	2.352	1.635	1.549	0.752										0.903	0.504	0.686	1		0.785						0.564		1.306	0.574					1.688	0.581					0.987
	0.742	1.269	0.976	1.428		0.897	1.396	1.326	1.036	0.937	1.46	1.25	1.417	1.324										0.623	0.959	1.168	0.529		0.755						2.162		1.012	0.552					1.824	1.158					0.252
	0.484	0.972	0.6	1.148		1.551	1.989	1.333	1.95	1.658	0.904	1.782	1.508	0.809										0.841	2.234	1.491	0.69		0.51						2.468		0.735	0.392					0.913	2.172
		0.505	1.012	1.008		0.639	1.459	0.94	1.695	1.516	2.081	0.914	0.725	1.948										1.409	1.731	0.448	0.555		0.502						1.4		2.491	1.322					1.774	1.971
		0.929	0.394	0.453		1.302	2.614	0.549	1.483	1.053	1.623	1.66	0.69	1.415										0.987	0.552	0.592	0.639		0.71						0.534		1.458	0.645					1.236	0.537
		0.937	0.777	0.616		1.474	1.118	1.012	2.043	0.649	1.731	0.8	1.628	1.324										0.731	1.152	0.829	1.025		0.97						1.144		1.543	1.766					1.851	1.252
		0.525	0.476	0.812		1.316	1.104	0.501	0.262	0.648	1.871	1.999	1.272	1.644										0.742	0.797	1.413	1.004		1.082						1.145		1.87	0.504					2.784	1.887
		1.444	0.581	0.695		1.56	1.172	0.745	1.511	0.714	0.959	0.975	2.002	0.871										1.496	0.349	1.041	0.547		0.549						2.689		2.295	0.987					2.153	0.793
		0.551	0.648	0.653		1.224	0.962	0.626	0.669	0.634	1.632	2.028	1.533	1.843										1.385	1.644	1.623	0.388		0.653						0.616		1.54	0.745					1.872	2.254
		0.809	0.71	0.626		1.241	1.793	0.708	1.619	0.981	1.688	1.42	1.259	1.37										1.682	1.234	1.583	1.323		0.68						0.721		1.906	0.665					0.955	2.326
		1.034	0.39	0.646		1.342	0.844	1.026	1.336	0.94	1.591	0.914	1.174	2.011										1.827	0.433	1.55	0.952		1.003						0.949		0.712	0.563						1.143
		0.707	0.368	0.484		0.841	1.241	1.37	1.371	1.041	2.397	0.611	1.081	1.484										0.923	1.364	1.774	1.132		0.97						1.485		1.241	2.067						3.341
		0.871	1.14	0.516		0.388	1.674	0.877	1.619	0.955	1.929	1.731	1.276	1.806										1.516	1.551	2.812	0.936		1.62						0.557		0.716	0.537						2.625
		0.541	0.39	0.812		1.358	0.949	1.258	1.424	2.049	1.211	1.819	1.487	1.816										1.004	1.126	2.144	0.521		1.258						0.394		0.953	0.419						0.857
		0.905	0.319	0.658		0.182	0.89	1.544	2.058	1.533	1.122	1.789	1.861	0.646										1.818	1.574	1.378	0.612		0.935						0.716		0.43	1.538						1.851
		0.935	0.377	0.97		1.364	0.824	0.635	2.211	1.646	1.037	2.609	1.973	1.268										1.145	1.451	1.234	0.841		0.704						2.063		1.923	1.627						2.616
		0.408	0.742	1.161		0.649	1.126	0.765	2.861	1.428	1.659	1.198	0.42	1.477										1.512	1.012	1.678	1.05		0.581						1.544		1.622	0.277						1.437
		0.844	0.6	1.581			1.724	0.847	2.115	1.685	2.336	1.825	0.987	0.577										1.588	0.931	0.613	0.532		1.119						0.571		2.571	0.52						1.918
		0.671	0.71	1.494			0.767	0.707	1.143	1.068	1.391	1.455	1.797	1.069										1.066	0.957	1.118	1.586		0.735						0.735		0.787	0.458						1.2
		0.894	1.449	1.226			0.593	1.66	0.952	1.14	1.847	1.789	1.666	1.518										1.212	0.75	1.252	0.462		1.14						0.581		0.707	0.557						1.056
		0.996	0.791	0.589			0.996	0.584	1.393	1.259	1.827	2.263	1.288	2.002										1.781	0.343	0.94	1.151		0.677						0.347		1.899	1.387						1.145
		0.413	0.683	0.781			2.24	0.838	0.847	1.781	1.033	1.429	0.962	1.073										1.329	1.288	0.658	0.58		1.464						1.582		0.532	2.516						1.169
		0.433	0.614	0.982			1.97	1.163	2.631	1.14	0.89	0.668	0.716	1.754										1.688	1.096	1.536	1.348		0.516						0.929		1.123	0.847						1.62
		1.453	0.304	1.322			2.003	0.376	1.409	0.433	1.296	1.04	1.279	1.323										1.847	1.156	1.635	0.577		0.692						3.916		1.103	0.399						2.237
		1.084	0.68	1.508			0.877	1.284	0.92	1.948	2.006	0.475	0.662	0.88										0.748	1.469	1.354	0.78		1.351								1.335	0.226						2.272
		1.126	1.04	0.904			0.368	1.098	1.326	1.406	1.942	1.851	1.378	1.229										1.457	0.987	0.678	1.02		1.761								0.97	0.912						0.51
		0.886	0.721	0.939			0.439	1.388	1.824	0.851	1.013	0.525	1.797	0.981										1.204	0.745	1.621	1.066		0.922								3.131	0.58						0.564
			0.807	0.871			0.593	0.71	1.583	1.601	1.241	0.947	1.002	1.615										1.002	0.673	1.276	0.698		1.241								1.677	0.593						1.98
			0.439	0.923			0.877	0.571	0.658	0.94	2.3	1.004	1.327	1.692										1.327	0.665	1.516	1.049		0.881								0.935	1.197						1.432
			0.492	0.683			1.316	0.368	0.793	1.66	1.789	1.204	0.981	1.31										1.809	0.975	2.689	0.865		0.731								1.977	2.784						2.076
			0.94	0.451			2.354	0.871	1.004	1.272	1.768	2.097	1.692	1.373										0.868	1.158	2.48	1.091		1.145								0.6	0.626						0.814
			0.484	0.867			1.666	1.517	1.646	0.537	1.417	1.04	1.174	1.652										1.119	1.198	1.683	1.039		2.036								1.186	2.132						2.144
			0.871	0.958			1.438	0.94	1.718	1.326	1.424	1.003	1.648	1.688										0.71	1.673	0.413	0.91		1.774								1	1.133						1.897
			0.564	0.593			1.024	1.161	1.323	1.391	1.524	1.347	1.567	1.264										1.14	1.518	0.981	1.246		1.458								0.488	0.439						1.512
			0.404	0.94			1.034	0.775	1.665	0.968	1.462	1.336	1.38	0.529										1.258	0.671	1.613	0.571		1.492								0.887	0.408
			0.64	0.774			1.826	0.534	0.97	1.396	1.112	1.829	0.439	0.806										0.645	0.909	1.428	0.639		1.295								2.487	1.183
			0.419	1.156			1.141	0.806	1.631	1.677	1.11	1.343	1.369	2.159										1.416	0.935	2.235	0.871		0.634								0.801	0.42
			0.549	0.752			2.244	0.824	0.798	0.959	1.453	1.036	1.474	0.935										1.845	0.639	1.935	0.525		1.129								0.742	1.38
			0.51	1.004			1.44	1.482	1.872	1.324	1.875	0.993	1.226	1.87										1.449	0.552	1.39	1.231		1.256								0.557	0.695
			1.095	1.033			1.558	0.753	2.121	1.375	1.845	1.809	1.145	2.149										1.064	1.197	0.807	1.884		0.844								1.959	0.343
			0.753	0.88			1.148	2.875	0.645	1.033	1.703	1.3	1.737	1.156										1.163	1.327	1.583	0.571		1.095								0.806	0.581
			0.725	0.571			1.736	1.131	1.99	1.948	1.778	1.377	1.676	1.559										1.088	1.265	1.691	1.053		1.39								0.806	0.439
			0.785	0.595			1.449	0.837	1.785	0.626	1.779	1.825	1.697	1.559										1.01	0.636	0.97	0.42		0.822								1.387	1.347
			0.322	1.126			1.323	0.877	1.291	1.033	1.258	0.912	2.379	1.088										1.601	1.072	1.324	0.26		1.682								3.015
			0.516	0.388			0.658	0.812	1.588	0.892	1.66	1.888	0.809	0.937										1.097	1.949	1.859			1.306								0.968
			0.404	0.981			0.966	0.453	0.904	0.861	1.278	0.989	0.847	1.682										1.521	0.791	0.982			0.918								1.648
			0.52	0.861			0.735		1.323	1.582	1.195	1.722	1.341	1.826										1.141	1.503	0.228			0.871								0.765
			0.424	0.404			1.002		0.517	1.454	1.646	1.813	1.02	0.937										1.813	1.361				0.851
			0.728	0.777			0.735		1.397	1.096	0.892	0.752	1.653	1.323										0.976	1.123				1.33
			0.595	0.696			1.131		1.004	1.843	1.034	1.212	1.581	1.685										1.261	0.439				0.923
			1.289	1.132			0.433		2.354	0.684	2.277	2.769	1.095	0.646										1.05	0.707				0.696
			0.665	0.897			2.258		0.937	0.897	0.775	2.086	1.65	1.111										1.925	0.922				1.259
			0.306	0.456			0.777		1.46	1.841	1.525	1.558	1.416	1.333										1.103	1.177				1.163
			0.439	0.653			1.219		1.098	1.072	1.665	1.502	2.135	1.451										1.183	0.903				1.31
			0.433	0.712			0.89		1.58	1.516	0.704	1.541	2.631	1.809										2.104	0.377				0.721
			0.854	0.462			1.978		2.246	1.296	2.048	1.506	1.165	1.909										1.72	0.707				0.817
			0.678	0.958			1.98		1.154	0.388	0.652	0.864	2.148	0.827										1.241	0.822				0.742
			0.797	0.62			0.898		1.204	1.103	1.646	1.238	1.604	1.183										1.387	1.356				0.996
			0.979	0.692			1.925		1.826	0.462	1.211	1.05	0.69	1.549										1.329	0.433				0.439
			0.753	1.542			2.53		1.356	0.707	1.29	1.773	2.584	1.682										0.623	1.484				1.556
			0.332	0.608			1.361		1.183	1.134	1.627	1.291	1.444	1.502										1.553	1.674				1.039
			0.563	0.465			0.955		1.391	1.119	1.631	1.429	1.702	1.181										1.224	1.29				1.33
			0.897	1.144			1.8		1.326	1.355	1.573	0.981	1.645	1.673										0.26	0.613				1.524
			0.332	1.065			0.62		1.228	1.144	1.395	1.399	1.61	1.195										0.753	1.197				1.186
			1.335	1.673			0.993		1.69	1.082	1.99	1.068	1.098	1.86										1.074	1.227				0.806
			1.335	0.419			0.735		1.714	1.69	1.096	0.669	1.76	1.096										1.717	1.336				0.94
			1.061	1.347			0.959		1.913	0.797	0.645	0.645	0.968	1.025										1.42	0.983				1.307
			0.439	0.905			0.608		1.292	0.563	1.592	0.668	1.229	1.239										1.169	1.588				0.64
			0.673	1.012			1.131		2.742	0.356	1.601	2.1	1.615	1.174										1.556	1.601				1.174
			0.626	0.959			0.841		0.904	1.091	0.736	1.531	1.487	1.024										1.471	0.838				1.361
			0.871	0.68			0.439		1.265	1.542	1.165	0.561	1.073	1.665										0.958	0.806				0.829
			0.71	1.615			0.851		1.737	1.564	1.145	0.775	0.912	1.635										1.148	0.233				0.645
			0.798				1.112		1.405	1.316	1.323	1.008	2.163	0.584										1.256	1.284				1.004
			0.399				1.234		2.286	1.026	1.648	0.579	1.709	1.347										1.306	1.288				0.695
			0.484				1.723		1.549	1.566	1.42	0.559	1.347	2.132										1.065	0.529				0.548
			0.643				0.859		1.551	1.037	1.039	0.793	2.323	0.937										2.326	1.054				0.547
			0.584				1.165		1.235	2.098	1.261	0.585	1.824	1.533										1.457	1.612				1.119
			0.851				2.026		1.471	1.48	0.851	1.565	1.637	1.593										0.479	0.47				1.3
			0.649				2.076		1.422	0.896	0.728	1.559	1.01	2.244										0.829	0.684				0.814
			0.448				0.894		0.913	1.018	1.197	0.689	1.864	1.214											0.476				0.968
			0.491				1.551		2.07	1.601	1.551	1.531	2.032	1.561											0.854				1.288
			0.51				0.613		1.082	0.975	2.673	2.103	2.019	1.662											0.877				0.73
			0.822				0.392		1.347	1.177	1.646	2.347	0.424	1.637											1.05				0.897
			0.775				1.156		1.925	0.844	2.235	1.468	1.86	0.343											0.806				0.581
			0.613				1.216		1.351	1.33	1.549	1.961	1.908	0.492											0.736				0.608
			0.322				1.065		1.601	1.126	1.75	1.445	1.437	1.52											1.646				0.665
			0.456				1.714		2.195	1.775	1.046	1.827	1.601	0.962											0.981				0.653
			0.451				1.284		2.376	2.165	2.743	0.808	1.032	2.236											0.645				0.388
			0.424				1.097		1.278	1.819	1.875	1.598	1.056	1.034											0.851				0.721
							0.983		0.918	1.254	2.546	2.039	1.151	0.923											1.002				0.816
							1.169		1.516	1.618	1.442	1.697	0.824	1.14											0.968				0.908
							1.785		1.516	0.479	1.238	1.851	0.808	2.208											0.665				0.851
							1.613		1.129	1.226	2.607	1.296	1.76	1.71											1.368				1.341
							0.75		1.252	0.791	1.036	1.541	1.549	1.058											0.648				1.072
							0.989		0.678	1.428	2.581	0.943	0.419	1.838											1.316				1.574
							0.462		0.505	1.503	2.282	1.291	1.744	1.3											0.645				0.936
							0.894		1.623	1.437	0.981	2.15	1.521	1.024											0.683				1.268
							1.834		2.193	1.193	1.943	2.059	1.372	1.163											0.952				0.949
							1.872		1.252	0.857	0.585	1.54	0.742	1.112											0.913
							1.356		1.098	1.226	2.302	0.871	1.326	0.725											1.721
							0.887		1.795	1.292	1.485	1.958	1.771	1.974											1.653
							1.074		1.809	1.098	2.525	1.05	0.649	1.302											0.924
							1.613		1.71	1.119	1.628	1.265	1.264	2.246											1.236
							0.551		2.109	1.521	1.898	1.605	1.825	1.342											0.975
							0.43		1.29	1.736	0.7	0.639	1.118	1.834											0.809
							1.905		1.244	0.996	1.54	0.639	1.929	0.861											0.623
							1.252		1.084	1.387	2.013	1.147	1.553	1.491											0.692
							0.671		1.604	1.104	1.183	0.539	1.438	2.089											0.944
							0.827		2.011	1.227	2.211	0.561	1.551	1.361											0.64
							1.745		1.284	0.646	0.736	1.223	0.485	1.271											1.174
							0.43		1.749	1.034	1.293	1.958	0.985	1.305											0.975
							0.64		1.069	0.94	1.52	1.256	0.419	0.949											1.469
							2.486		1.643	1.904	1.414	1.541	1.129	0.857											0.665
							0.716		1.44	1.774	1.591	1.504	2.068	2.907											1.351
							1.604		0.806	0.648	2.173	1.125	1.945	2.105											0.645
							1.373		0.78	1.232	1.205	1.582	1.378	1.316											0.479
							0.408		0.968	1.391	1.254	0.99	0.857	1.491											0.653
							0.714		1.101	1.688	2.427	2.061	1.2	1.991											0.6
							0.867		1.355	1.054	1.442	0.752	1.489	1.512											1.393
							0.563		1.332	1.645	1.619	0.864	1.268	1.72											0.649
							0.94		1.05	1.379	0.962	2.257	0.68	1.612											0.936
							1.607		1.504	1.688	1.679	2.538	1.361	1.582											0.871
							1.219		1.053	1.369	1.985	1.231	0.981	0.665											1.329
							1.784		1.214	1.896	1.145	1.889	1.189	1.277											0.806
							1.064		1.415	0.968	2.8	1.885	1.155	1.039											0.904
							1.284		1.749	0.548	1.892	1.388	1.289	1.916											1.288
							1.893		1.264	0.448	2.176	1.901	1.024	1.347											0.623
							0.913		2.036	1	1.8	1.712	1.197	1.076											0.838
							0.785		1.669	1.448	1.969	2.208	3.058	0.51											1.103
							1.335		1.736	0.677	2.678	1.27	1.727	1.48											1.047
							0.827		1.652	1.181	0.443	0.608	1.8	1.208											1.413
									1.793	1.516	1.721	1.015	1.032	1.582											0.797
									2.06	1.546	1.637	1.531	1.428	1.144											0.966
									1.045	1.204	1.768	0.943	0.993	1.706											1.343
									1.209	0.922	0.518	0.99	1.44	1.739											1.05
									1.082	1.46	2.174	1.17	1.298	1.471											0.909
									0.806	0.541	2.538	1.746	0.908	2.252											0.859
									0.886	1.521	1.776	0.693	1.235	2.038											1.582
									1.424	1.925	2.406	1.905	2.02	1.665											0.525
									1.417	0.548	1.654	1.004	1.662	1.186											0.887
									1.89	0.721	1.679	1.505	1.231	1.968
									1.472	1.208	2.41	1.325	1.214	1.459
									1.246	0.787	2.41	0.475	2.178	1.02
									1.3	1.987	2.245	1.214	0.824	1.557
									1.548	1.458	1.682	0.912	0.649	1.335
									1.272	1.511	1.824	1.808	1.302	2.101
									1.241	1.14	2.22	1.493	1.212	1.532
									1.29	1.779	1.686	0.789	0.981	1.069
									1.316	1.2	1.605	1.922	1.415	1.63
									1.294	1.385	1.678	2.102	1.734	1.731
									2.008	1.582	1.831	1.222	1.269	1.432
									1.677	1.351	1.29	1.731	2.175	1.144
									1.645	0.871	0.523	1.196	1.724	1.279
									1.236	1.583	0.962	1.046	1.612	1.428
									2.009	1.33	1.764	2.478	1.557	1.064
									1.76	1.737	2.109	1.116	0.502	0.735
									1.899	0.695	1.338	1.11	2.221	1.013
									1.226	1.28	1.4	1.794		1.697
									1.069	1.194	1.223	1.507		1.977
									1.378	0.91	1.867	1.757		1.676
									1.406	0.93	1.435	0.559
									1.53	1.551	1.217	0.561
									1.875	0.564	1.498	1.429
									1.158	1.449	1.541	1.424
									1.069	0.721	1.541	0.939
									1.517	0.502	2.972	1.701
									1.809	1.419	1.596	1.751
									1.62	0.848	2.14	1.91
									1.862	0.774	2.352	1.35
									1.763	1.409	1.541	1.978
									1.273	1.347	1.686	1.643
									2.24	1.692	1.525	0.695
									2.048	0.94	0.742	0.597
									1.385	0.785	2.884	1.265
									0.981	2.147	2.236	1.809
									1.471	1.026	2.543	1.765
									1.508	2.539	2.341	0.975
									1.369	1.777	2.066	1.346
									2.785	1.532	1.068	1.003
									0.868	2.093	1.527	1.636
									2.344	1.676	1.325	2.055
									1.484	0.581	2.337	1.411
									1.156	1.89	1.42	0.835
									1.158	1.91	1.498	1.471
									0.735	1.336	1.406	1.096
									0.886	2.37	1.815	1.033
									1.151	1.613	1.254	2.157
									1.231	0.504	1.183	2.18
									1.494	1.444	1.679	1.129
									1.371	2.54	2.075	1.254
									1.385	1.71	1.712	0.518
									1.501	1.516	1.577	1.432
									1.755	1.228	1.746	0.966
									2.013	0.922	2.107	1.451
									1.612	1.235	1.278	1.23
									2.415	1.575	2.269	1.678
									1.025	1.396	1.506	2.15
									1.039	1.69	1.008	1.036
									1.209	1.387	0.835	1.52
									0.996	0.806	0.639	0.7
									1.161	1.652	2.29	1.66
									2.936	1.074	1.67	2.086
									0.996	1.02	1.814	1.019
									1.575	2.352	2.066	1.205
									0.643	1.514	1.504	1.505
									1.316	0.753	1.316	1.212
									1.387	0.937	1.52	0.914
									2.316	2.192	1.948	1.135
									1.391	2.198	2.481
									1	1.252	2.214
									1.852	1.457	1.586
									0.525	1.776	1.592
									0.581	1.89	0.871
									0.537	1.522	1.483
									1.291	1.256	0.943
									1.102	1.378	1.183
									1.872	1.304	1.369
									1.466	1.633	2.289
									2.152	1.632	2.021
									0.939	0.413	1.948
									1.14	0.868	1.17
									1.449	2.084	2.221
									2.094	1.068	1.837
									1.826	1.261	2.286
									0.93	1.924	1.015
									1.141	0.826	1.078
									1.677	1.739	1.164
									1.83	1.369	1.334
									1.532	2.051	1.019
									1.848	1.389	0.385
									1.53	0.571	2.108
									0.742	1.29	1.338
									1.42	1.33	1.701
									1.558	1.704	1.511
									1.449	1.416	1.925
									1.316	1.471	1.66
									1.464	1.643	1.605
									1.143	1.638	1.05
										1.486	1.294
										2.322	1.9
										1.655	1.809
										1.685	1.485
										2.005	1.643
										1.073	1.621
										1.204	1.442
										1.081	1.205
										1.846	1.881
										1.53	1.409
										1.143	2.408
										1.211	2.193
										0.944	1.965
										1.402	0.904
										1.748	2.161
										1.012	1.493
										2.24	1.925
										2.237	0.955
										1.612	1.054
										1.781	1.694
										1.82	1.825
										1.669	2.109
										2.288	0.914
										1.101	0.775
										1.764	1.158
										1.454	2.347
										0.897	1.808
										0.686	0.8
										0.912	0.518
										1.862	0.817
										2.228	1.291
										1.691	1.616
										1.066	1.741
										1.081	1.11
										0.458	1.102
										1.29	1.039
										1.186
										2.096
										2.135
										2.235
										1.361
										1.391
										1.489
										1.645
										1.354
[truncated: 14 more columns]
