# Supplementary material for: A stable microtubule bundle formed through an orchestrated multistep process controls quiescence exit
Source: eLife. 2024 Mar 25;12:RP89958. doi: 10.7554/eLife.89958 (PMC10963028; doi:10.7554/eLife.89958)
Supplement: Figure 4—source data 3. [file elife-89958-fig4-data3.xlsx]

## Sheet: Feuil1
	Isy143 (cin8delta)T+7h
	ROI voir folder				Tubulin Int
	524.624	544.481	-39.714		296.124	298.56	-4.872		451.187	298.56	305.254		398.593	406.71	-16.234		786.05	739.147	93.806		372.192	361.242	21.9		555.965	488.861	134.208		362.24	339.688	45.104		453.918	415.924	75.988		730.661	655.559	150.204		704.249	597.205	214.088		715.965	674.207	83.516		622.127
	658.514	619.219	78.59		489.87	397.476	184.788		627.118	397.476	459.284		512.563	483.369	58.388		1253.2	1100.39	305.618		459.952	459.282	1.34		742.096	695.479	93.234		446.641	436.078	21.126		582.851	539.088	87.526		905.662	793.259	224.806		761.137	629.896	262.482		823.401	734.256	178.29		731.665
	900.114	800.436	199.356		605.109	494.886	220.446		870.408	494.886	751.044		600.564	587.147	26.834		2033.2	1673.12	720.158		568.328	521.665	93.326		1132.11	980.384	303.452		526.439	502.996	46.886		686.688	630.73	111.916		1247.38	1030.56	433.638		963.864	803.779	320.17		1062.68	889.766	345.83		948.725
	982.681	818.782	327.798		636.736	567.346	138.78		1608.62	567.346	2082.55		835.622	718.165	234.914		3233.98	2625.29	1217.39		931.538	748.621	365.834		1704.32	1323.59	761.456		705.724	579.22	253.008		1137.78	932.956	409.644		1714.87	1417.23	595.272		1135.55	963.686	343.728		1430.43	1166.13	528.604		1334.72
	1138.51	875.221	526.586		1073.14	888.62	369.048		2474.95	888.62	3172.65		1165.12	932.698	464.836		4327.94	3499.43	1657.03		1392.81	1034.25	717.104		2303.59	1732.84	1141.48		971.885	793.358	357.054		1735.21	1303.6	863.236		2108.06	1673.72	868.684		1480.77	1156.43	648.676		1590.98	1299.57	582.814		1804.62
	1448.06	1139.8	616.52		1505.55	1152.88	705.356		2745.98	1152.88	3186.2		1634.18	1243.05	782.256		4639.66	3733.87	1811.59		1494.94	1168.24	653.398		2567.35	1951.73	1231.24		1417.15	1039.41	755.466		1833.96	1381.56	904.804		2283.72	1762.14	1043.16		1954.95	1485.61	938.692		1534.24	1253.44	561.598		2129.24
	1857.33	1401.6	911.46		1530.7	1178.01	705.38		2557.99	1178.01	2759.97		1911.37	1441.03	940.674		4465.13	3590.73	1748.8		1375.43	1092.01	566.846		2273.25	1818.88	908.728		1917.14	1427.94	978.408		1612.49	1259.16	706.664		2321.42	1796.98	1048.88		2083.46	1534.03	1098.86		1631.35	1349.31	564.084		2100.79
	1930.47	1512.73	835.476		1456.7	1098.88	715.636		2323.81	1098.88	2449.86		1822.45	1312.71	1019.47		3906.43	3036.61	1739.62		1411.62	1098.94	625.364		1916.1	1538.95	754.302		2022.77	1526.29	992.954		1308.46	1027.17	562.582		2236.73	1728	1017.47		1873.34	1414.03	918.618		1729.68	1342.51	774.34		1745.63
	1842.39	1377.05	930.684		1328.12	989.689	676.854		2086.45	989.689	2193.52		1736.89	1225.92	1021.94		3527.79	2673.64	1708.31		1310.34	1030.81	559.052		1601.52	1309.95	583.138		1748.13	1357.47	781.316		1101.86	883.909	435.906		2078.96	1607.37	943.192		1699.86	1315.92	767.876		1713.68	1320.64	786.076		1569.08
	1623.1	1254.71	736.768		1138.57	812.861	651.424		2037.55	812.861	2449.38		1612.45	1175.85	873.21		2979.02	2231.74	1494.55		1255.61	967.327	576.562		1333.68	1145.35	376.67		1755.77	1306.95	897.636		788.874	679.582	218.584		1668.81	1371.9	593.808		1426.31	1125.58	601.462		1516.51	1248	537.018		1551.07
	1546.3	1171.45	749.708		1018.95	764.665	508.568		1781.85	764.665	2034.37		1560.33	1143.25	834.15		2372.74	1804.17	1137.14		1125.12	880.713	488.81		1157.25	1007.69	299.114		1551.32	1163.17	776.302		665.332	614.311	102.042		1516.46	1232.36	568.208		1301.78	1029.89	543.774		1470.08	1220.09	499.982		1457.11
	1198.41	964.886	467.056		810.355	643.39	333.93		1365.55	643.39	1444.31		1549.33	1133.63	831.402		1817.76	1401.13	833.262		941.64	754.422	374.436		919.379	828.277	182.204		1302.15	1011.76	580.776		631.428	548.852	165.152		1279.87	1055.87	447.992		1252.36	1007.44	489.85		1459.8	1213.53	492.54		1086.01
	1003.86	832.195	343.328		845.607	675.778	339.658		1447.13	675.778	1542.7		1267.25	953.567	627.368		1399.57	1109.51	580.114		743.981	617.864	252.234		792.06	740.768	102.584		1274.39	1041.46	465.866		597.639	487.109	221.06		1051.82	873.781	356.08		1174.6	946.5	456.19		1367.43	1128.48	477.9		872.239
	1035.97	889.326	293.28		759.022	634.413	249.218		1154.19	634.413	1039.55		1176.91	851.99	649.85		985.007	852.791	264.432		662.132	590.588	143.088		695.235	638.955	112.56		989.907	794.113	391.588		585.584	478.544	214.08		925.578	745.752	359.652		1043.56	856.794	373.532		1347.24	1107.93	478.606		648.483
	927.084	758.845	336.478		486.709	447.854	77.71		1104.61	447.854	1313.51		1090	770.856	638.294		655.66	592.45	126.42		611.331	556.386	109.89		566.042	560.3	11.484		856.258	743.374	225.768		486.742	453.376	66.732		796.889	657.711	278.356		1061.83	893.237	337.188		1381.38	1092.81	577.14		503.171
	848.887	718.247	261.28		501.703	465.455	72.496		971.316	465.455	1011.72		928.535	635.413	586.244						603.217	526.865	152.704						709.537	602.79	213.494		491.313	474.62	33.386		593.446	551.076	84.74		805.782	694.867	221.83		1349.57	1067.97	563.202		496.198
	773.376	671.293	204.166		468.975	418.406	101.138		658.625	418.406	480.438		809.739	601.586	416.306														636.459	548.557	175.804		512.156	450.061	124.19		406.738	429.219	-44.962		737.708	660.061	155.294		1258.43	1051.24	414.374		419.431
	615.128	582.834	64.588		458.87	390.269	137.202		565.252	390.269	349.966		668.15	502.09	332.12														775.902	642.891	266.022		563.609	491.801	143.616		505.989	423.753	164.472		850.759	690.741	320.036		1361.73	1069.2	585.068
	463.246	488.093	-49.694								0		656.83	518.264	277.132														816.262	683.557	265.41		535.792	481.925	107.734		462.995	390.657	144.676		693.603	587.615	211.976		1312.74	1004.38	616.736
	389.611	409.472	-39.722										671.899	551.354	241.09														740.944	617.839	246.21		439.009	377.283	123.452				0		497.523	450.841	93.364		1225.56	930.046	591.032
	324.344	308.525	31.638										564.026	477.223	173.606														614.349	522.276	184.146										543.221	415.078	256.286		900.705	728.978	343.454
	340.91	296.971	87.878										512.143	419.881	184.524														534.449	465.065	138.768														565.529	523.546	83.966
	330.819	298.261	65.116										465.51	383.656	163.708														488.339	475.482	25.714														537.777	508.252	59.05
																													364.133	313.083	102.1
																													273.384	245.07	56.628
																													306.248	254.341	103.814
	Isy143 (cin8delta)T+24h
	ROI voir folder				Tubulin Int
	422.386	402.508	39.756		601.505	557.309	88.392		451.218	464.946	-27.456		459.495	392.083	134.824		779.718	739.87	79.696		403.392	396.397	13.99		850.641	801.245	98.792		999.726	944.973	109.506		849.759	777.706	144.106		352.044	389.071	-74.054		478.615	461.363	34.504		559.296	581.141	-43.69		960.789
	499.809	464.991	69.636		782.217	704.691	155.052		566.542	586.429	-39.774		730.744	627.57	206.348		979.77	901.282	156.976		705.297	588.25	234.094		933.814	910.235	47.158		1099.18	1080.47	37.416		1006.67	965.88	81.586		480.516	488.69	-16.348		592.707	600.438	-15.462		773.058	771.681	2.754		929.16
	794.535	696.265	196.54		1054.9	977.029	155.736		883.905	800.314	167.182		1258.75	969.099	579.294		1293.86	1188.56	210.592		948.16	777.716	340.888		1206.85	1102.33	209.036		1291.15	1288.37	5.562		1530.68	1399.87	261.61		528.365	434.124	188.482		837.637	792.419	90.436		1203.18	1050.37	305.618		1278.97
	905.752	805.018	201.468		1497.45	1373.6	247.696		1418.37	1192.29	452.162		1952.84	1450.51	1004.67		1877.56	1560.81	633.498		1145.56	936.584	417.956		1690.95	1458.48	464.942		1702.8	1673.81	57.984		2042.39	1686.87	711.044		664.012	521.611	284.802		1187.78	929.234	517.086		1470.84	1236.62	468.438		1748.74
	1313.64	1099.18	428.92		2124.6	1793.19	662.822		1754.14	1372.66	762.948		2762.74	2019.88	1485.72		2388.91	1865.53	1046.77		1556.71	1118.83	875.756		2605.59	2115.57	980.03		2258.26	2030.54	455.442		2476.18	1950.03	1052.31		731.14	647.134	168.012		1690.29	1295.27	790.03		1563.01	1238.18	649.648		2515.79
	1769.81	1365.07	809.488		2663.11	2099.72	1126.78		2090.1	1629.43	921.342		2825.44	2073.46	1503.96		2618.47	2035.42	1166.1		1862.33	1358.15	1008.35		3471.38	2751.98	1438.79		3507.17	2809.96	1394.41		3278.47	2493.75	1569.43		903.206	787.34	231.732		2052.52	1521.45	1062.13		1608.13	1328.86	558.55		3326.42
	2130.04	1615.83	1028.42		2780.37	2118.97	1322.8		2205.63	1714.94	981.376		2857.26	2144.25	1426.03		2614.88	2037.57	1154.6		1968.43	1522.54	891.784		3874.79	3085.82	1577.96		4350.54	3374.66	1951.76		3375.73	2546.2	1659.07		1008.16	888.54	239.248		2166.22	1599.32	1133.79		1799.16	1426.06	746.198		3800.03
	2117.11	1594.24	1045.74		2545.87	1989.9	1111.93		2143.72	1627.94	1031.57		2975.01	2143.79	1662.44		2175.09	1761.64	826.902		2119.01	1561.83	1114.36		3739.44	3049.8	1379.28		4752.81	3554.53	2396.57		3179.87	2522.97	1313.81		1123.32	1000.21	246.216		1831.75	1449.04	765.412		1749.43	1365.48	767.916		3957.17
	2020.75	1522.4	996.706		2122.82	1664.71	916.216		1880.2	1416.66	927.076		2873.99	2125.03	1497.94		1978.57	1643.32	670.508		1957.05	1443.23	1027.63		3646.29	2939.15	1414.28		4801.5	3530.58	2541.84		2840.57	2270.78	1139.58		1251.31	1114.65	273.32		1550.95	1245.37	611.15		1786.58	1374.96	823.238		3723.88
	2001.37	1413.14	1176.46		1694.08	1370.16	647.844		1755.12	1358.8	792.636		2905.89	2177.71	1456.34		1678.36	1398.53	559.656		1731.58	1297.17	868.826		3261.52	2553.56	1415.92		4704.19	3558.87	2290.64		2558.66	2051.07	1015.16		1252.78	1013.25	479.058		1285.6	1022.72	525.756		1816.97	1395.7	842.544		3199.24
	1775.75	1272.68	1006.13		1337.98	1100.01	475.928		1470.38	1163.15	614.452		2648.08	1934.89	1426.38		1397.33	1155.15	484.346		1674.34	1278.24	792.204		2907.83	2302.59	1210.48		4283.21	3340.05	1886.32		1891.68	1600.04	583.29		1135.89	959.248	353.282		899.536	813.614	171.844		1573.35	1223.85	699.012		2618.62
	1550.59	1175.88	749.408		959.203	834.226	249.954		1188.22	994.512	387.416		2491.58	1808.47	1366.2		1080.57	890.942	379.256		1594.32	1237.13	714.38		2739.08	2252.11	973.934		4003.2	3112.08	1782.23		1435.56	1258.08	354.956		1293.05	1035.13	515.83		787.057	717.936	138.242		1345	1052.74	584.534		2041.53
	1287.08	945.062	684.034		752.295	687.082	130.426		858.399	737.658	241.482		2280.61	1708.36	1144.51		773.219	736.062	74.314		1509.12	1168.31	681.626		2464.38	2055.22	818.312		3715.42	2811.57	1807.7		1114.28	1021.41	185.748		1189.66	981.91	415.5		578.193	577.522	1.342		1024.4	904.2	240.394		1482.02
	1057.29	826.506	461.576		700.27	634.725	131.09		736.423	630.952	210.942		1970.15	1489.49	961.322		860.907	775.692	170.43		1566.31	1187.31	757.998		2173.13	1827.24	691.78		3072.32	2434.21	1276.22		832.305	808.975	46.66		1123.19	901.733	442.906		472.867	495.639	-45.544		906.25	789.717	233.066		1155.81
	918.146	768.944	298.404						567.803	485.714	164.178		1649.08	1287.82	722.522		822.947	774.774	96.346		1557.9	1163.17	789.448		1711.93	1568.51	286.832		2838.57	2272.62	1131.88		646.237	647.673	-2.872		1041.58	910.42	262.324		516.834	515.791	2.086		688.705	604.565	168.28		865.048
	739.464	612.318	254.292						433.988	398.961	70.054		1419.86	1098.84	642.042						1557.09	1122.43	869.32		1624.68	1498.46	252.438		2247.31	1888.13	718.352		636.253	576.205	120.096		972.017	797.297	349.44						590.047	531.987	116.12		739.053
	578.723	534.354	88.738						486.685	423.305	126.76		1366.86	1017.11	699.504						1318.97	1004.15	629.644		1583.27	1427.2	312.132		1781.6	1593.22	376.754						839.281	717.981	242.6						543.915	586.908	-85.986		755.05
	473.391	461.517	23.748						386.912	331.506	110.812		1240.63	957.809	565.65						1197.49	949.722	495.536		1505.66	1358.31	294.69		1420.15	1298.47	243.348						742.011	633.496	217.03
	463.246	488.093	-49.694										1214.15	982.845	462.606						1013.53	817.539	391.978		1241.07	1213.99	54.164		1135.34	1023.84	223.01						691.441	598.572	185.738
	389.611	409.472	-39.722										901.832	712.146	379.372						907.759	767.236	281.046		1228.24	1224.71	7.062		944.225	900.246	87.958						478.481	470.966	15.03
	324.344	308.525	31.638										680.95	586.912	188.076						615.617	561.417	108.4						822.42	836.976	-29.112						492.361	458.87	66.982
	340.91	296.971	87.878										422.823	436.898	-28.15						524.223	517.154	14.138						720.691	695.535	50.312
	330.819	298.261	65.116										380.221	382.59	-4.738
	Isy53 (WT) T+7h
	ROI voir folder				Tubulin Int
	368.271	387.104	-37.666		384.459	387.114	-5.31		1103.58	989.695	227.776		318.917	321.243	-4.652		519.805	445.737	148.136		446.67	418.364	56.612		768.51	669.44	198.14		207.961	229.374	-42.826		407.761	411.506	-7.49		501.782	461.032	81.5		255.802	283.792	-55.98		476.283	387.664	177.238		560.854
	587.477	499.248	176.458		462.712	427.696	70.032		1474.08	1340.08	268.002		511.801	520.519	-17.436		640.393	569.179	142.428		589.699	580.482	18.434		899.851	742.778	314.146		254.985	285.155	-60.34		585.793	494.322	182.942		701.788	659.385	84.806		203.733	237.007	-66.548		515.284	386.847	256.874		682.273
	747.352	632.736	229.232		904.348	731.179	346.338		2216.15	1898.5	635.3		885.301	746.324	277.954		865.608	779.838	171.54		819.551	691.361	256.38		1239.49	1076.38	326.228		356.495	346.135	20.72		1167.46	823.071	688.778		1024.66	860.282	328.758		476.842	452.708	48.268		611.747	446.043	331.408		883.593
	1055.59	834.008	443.156		1233.85	971.45	524.806		2848.26	2242.67	1211.19		1374.85	1020.87	707.956		1512.56	1181.53	662.066		1323.05	1029.16	587.768		1956.56	1557.54	798.03		384.6	374.51	20.18		1870.91	1336.14	1069.54		1722.62	1310.01	825.216		827.312	644.003	366.618		812.085	667.707	288.756		1193.91
	1409.04	1078.55	660.976		1288.46	961.611	653.7		3163.52	2419.43	1488.17		1565.8	1210.92	709.758		2127.87	1584.48	1086.78		2075.22	1541.85	1066.74		2691.27	2136.43	1109.68		556.31	486.653	139.314		2189.76	1511.87	1355.8		2513.18	1779.67	1467.03		937.101	739.539	395.124		1415.66	1104.04	623.258		1480.89
	1752.43	1287.09	930.666		1252.83	994.726	516.198		3201.86	2363.13	1677.46		2071.03	1457.11	1227.85		2152.91	1593.93	1117.96		2820.29	2020.3	1599.98		3071.04	2256.44	1629.21		944.84	725.34	439		1884.32	1334.4	1099.85		2430.41	1726.27	1408.28		941.899	736.804	410.19		2034.92	1499.87	1070.1		1665.54
	1789.5	1297.89	983.216		1090	799.683	580.63		3105.41	2218.07	1774.66		2453.79	1710.38	1486.83		2072.42	1555.81	1033.21		3094.07	2248.9	1690.34		3120.31	2213.51	1813.61		1118.09	858.651	518.876		1666.83	1222.69	888.278		2314.34	1725.79	1177.11		847.526	622.153	450.746		2039	1530.82	1016.35		1484.75
	1793.98	1322.92	942.128		821.144	657.968	326.352		2585.14	1895.43	1379.42		2457.17	1798.71	1316.93		1802.43	1350.78	903.308		2875.9	2069.13	1613.55		2968.6	2089.51	1758.18		1259.55	935.279	648.534		1657.04	1188.39	937.302		2138.83	1627.67	1022.32		649.59	469.212	360.756		1962.79	1496.12	933.33		1219.95
	1655.93	1269.63	772.614		628.428	542.759	171.338		2173.1	1627.15	1091.9		2340.82	1722.87	1235.91		1605.57	1220.86	769.426		2542.64	1942.32	1200.63		2701.24	1949.62	1503.24		1310.59	969.758	681.666		1335.13	992.092	686.076		1766.39	1430.15	672.482		771.768	604.369	334.798		1857.57	1401.08	912.974		1212.23
	1549.12	1200.95	696.342		517.428	465.627	103.602		1519.91	1212.02	615.79		2229.37	1581.26	1296.23		1551.43	1161.81	779.25		2054.55	1652.98	803.152		2276.46	1731.39	1090.14		1297.33	970.828	653.006		945.213	774.145	342.136		1592.92	1368.9	448.038		706.901	557.141	299.52		1758.62	1312.02	893.194		987.469
	1235.66	977.101	517.118		485.296	435.518	99.556		1079.62	896.95	365.35		2064.53	1526.43	1076.2		1336.11	984.031	704.152		1744.93	1460.77	568.322		1845.34	1409.63	871.42		1215.73	928.88	573.7		742.639	648.051	189.176		1220.95	1007.32	427.266		580.842	421.387	318.91		1680.35	1314	732.692		766.467
	1021.94	800.704	442.478		354.952	338.433	33.038		732.537	645.423	174.228		1840.98	1425.54	830.896		1042.52	787.619	509.796		1182.38	1080.19	204.38		1459.02	1159.41	599.226		1145.83	878.362	534.93		576.77	477.009	199.522		972.447	803.884	337.126		503.643	396.124	215.038		1626.81	1280.48	692.654		447.714
	691.639	617.346	148.586						485.71	451.639	68.142		1607.36	1222.71	769.312		687.206	577.581	219.25		847.171	851.501	-8.66		998.785	840.553	316.464		846.327	685.668	321.318		463.335	398.826	129.018		790.831	722.513	136.636		321.301	281.645	79.312		1513.44	1149.8	727.29		405.583
	623.227	559.269	127.916										1147.2	925.605	443.184		398.896	369.942	57.908		601.96	542.061	119.798		838.016	695.051	285.93		837.608	644.066	387.084						566.51	574.897	-16.774		240.065	193.678	92.774		1405.12	1101.28	607.698		444.227
	465.622	442.332	46.58										771.377	655.267	232.22		434.279	363.24	142.078		578.247	587.171	-17.848		659.462	643.329	32.266		759.291	648.757	221.068						444.412	459.553	-30.282		289.628	273.994	31.268		1020.83	813.744	414.176		405.809
	355.109	367.907	-25.596										592.006	552.557	78.898						592.109	602.54	-20.862						514.125	448.342	131.566														833.606	720.729	225.754
	355.325	331.654	47.342										473.484	455.785	35.398						511.942	549.126	-74.368						454.561	458.671	-8.22														555.706	530.653	50.106
			0										337.808	318.684	38.248														484.369	442.657	83.424														480.283	429.077	102.412
													361.204	347.134	28.14														319.292	349.971	-61.358														416.881	354.593	124.576
	Isy53 (WT) T+24h
	ROI voir folder				Tubulin Int
	1548.2	1523.21	49.982		1482.28	1382.46	199.634		963.812	882.5	162.624		1823.74	1859.91	-72.338		1447.3	1360.69	173.206		1160	1167.71	-15.424		1021.98	963.279	117.408		1737.5	1491.01	492.98		1383.4	1365.82	35.16		561.279	593.573	-64.588		1458.94	1155.94	605.994		1942.4	1947.44	-10.084		2867.76
	2063.97	2146.28	-164.636		2091.51	1781.52	619.968		1357.23	1199.13	316.19		2410.51	2467.94	-114.848		2173.05	1938.47	469.156		1658.47	1631.21	54.52		1565.7	1434.85	261.696		1944	1723.16	441.68		1802.44	1735.5	133.886		536.177	596.864	-121.374		2379.04	2073.57	610.926		2716.2	2639.24	153.922		3378.41
	3525.59	3392.36	266.464		2853.38	2329.78	1047.21		1903.27	1593.39	619.76		3561.36	3513.49	95.746		3198.45	2729.77	937.376		2551.54	2355.02	393.046		2872.05	2502.33	739.432		2284.68	1977.76	613.836		2691.92	2384.63	614.58		1046	934.668	222.668		3507.1	2997.77	1018.65		4319.9	3765.08	1109.63		4033.5
	4883.1	4124.6	1516.99		3754.66	2987.78	1533.76		2317.68	2031.38	572.588		5073.88	4585.9	975.97		4034.1	3280.94	1506.31		3546.84	3138.23	817.228		4480.48	3542.94	1875.08		2889.9	2253.54	1272.72		4239.24	3294.3	1889.87		2083.58	1684.36	798.452		4107.82	3581.82	1052.02		6601.21	5280.05	2642.32		5099.56
	5848.59	4583.27	2530.64		4705.83	3531.85	2347.97		2703.22	2225.65	955.144		6607.66	5600.5	2014.32		4945.82	3808.06	2275.53		4499.24	3847.21	1304.05		5622.33	4228.74	2787.16		3217.65	2380.35	1674.6		5894.15	4442.93	2902.45		3348.53	2503.61	1689.84		4576.36	3833.13	1486.45		7627.32	6154	2946.63		5639.19
	6295.04	4736.64	3116.8		5312.75	3964	2697.5		3434.98	2693.29	1483.39		8736.95	7000.93	3472.05		5599.86	4189.73	2820.28		5054.97	4334.7	1440.53		5723.79	4150.04	3147.49		3106.18	2325.01	1562.35		6866.02	5064.31	3603.41		4078.48	3029.18	2098.6		4851.78	3908.61	1886.33		7326.83	6144.51	2364.64		5544.63
	6326.23	4604.61	3443.23		5531.59	4133.25	2796.67		4274.98	3194.28	2161.39		9557.45	7482.41	4150.06		5697.3	4229.94	2934.72		6133.22	4926.31	2413.84		4924.27	3701.73	2445.08		2835.73	2147.16	1377.15		7208.07	5210.97	3994.21		4165.67	3203.07	1925.2		4779.11	3824.02	1910.17		6947.38	5695.94	2502.88		4991.41
	5927.64	4417.8	3019.68		5567.15	4141.81	2850.68		4461.31	3367.97	2186.69		8213.6	6629.13	3168.95		5358.31	4001.68	2713.27		6781.85	5358.45	2846.82		3966.06	3026.62	1878.88		2487.34	1886.68	1201.31		7035.44	5029.97	4010.93		3826.11	2930.5	1791.22		4625.98	3736.7	1778.56		6418.57	5309.42	2218.31		4660.82
	5564.04	4107.03	2914.02		5024.48	3950.01	2148.92		4707.09	3485.86	2442.44		6876.09	5726.23	2299.73		4869.81	3633.68	2472.25		6485.51	5098.48	2774.08		2944.5	2372.07	1144.86		2158.29	1638.99	1038.6		5878.34	4409.54	2937.61		3653.65	2774.24	1758.82		4424.96	3550.46	1749.01		5667.99	4688.53	1958.93		4275.52
	5080.61	3817.08	2527.06		4836.18	3787.23	2097.91		4551.03	3397.12	2307.81		6071.86	5046.05	2051.61		4915.82	3578.24	2675.15		5600.49	4574.72	2051.54		2347.05	1968.28	757.528		1818.62	1366.95	903.348		4474.85	3511.93	1925.84		3601.12	2689.26	1823.71		4169.71	3360.89	1617.63		4424.66	3942.5	964.326		4178.53
	4783.15	3525.46	2515.38		4457.38	3539.13	1836.49		4378.58	3123.87	2509.41		5300.27	4278.1	2044.35		4310.81	3258.11	2105.4		4940.74	4019.53	1842.42		1742.37	1546.63	391.48		1437.57	1097.8	679.552		3295.11	2656.75	1276.72		3452.2	2472.85	1958.69		4029.78	3286.86	1485.86		3363.97	3172.86	382.212		3965.24
	4373.59	3234.49	2278.2		3579.99	2932.7	1294.58		3739.26	2850.47	1777.58		4582.71	3823.07	1519.29		3785.67	2773.28	2024.79		4334.59	3548.51	1572.14		1445.78	1288.44	314.686		1218.61	965.563	506.09		2223.28	1937.29	571.98		2665.35	2031.18	1268.32		3741.56	3053.39	1376.33		2738.51	2770.76	-64.494		3603.04
	3554.39	2803.67	1501.44		2600.24	2305.82	588.85		3255.4	2473.12	1564.56		3791.19	3127.88	1326.63		3078.52	2293.43	1570.17		3796.68	3128.31	1336.73		1280.55	1189.37	182.36		1063.65	891.812	343.686		1667.05	1520.34	293.436		1787.59	1462.55	650.08		3597.74	2971.9	1251.68		2258.48	2441.79	-366.618		3257.51
	2758.01	2257.23	1001.56		1843.79	1699.12	289.344		2773.93	2197.5	1152.86		3315.53	2927.69	775.676		2415.29	1886.79	1057		3425.1	2901.8	1046.58		1118.6	1065.25	106.698		1073.17	960.074	226.196		1254.27	1159.74	189.064		1384.18	1179.09	410.182		3236.49	2647.76	1177.46						2718.17
	2292.41	1932.71	719.394		1198.17	1155.11	86.132		2307.78	1786.14	1043.28		2937.96	2542.48	790.962		1850	1471.05	757.902		2898.74	2436.78	923.922		1013.65	985.886	55.522		1117.45	1005.62	223.658		1137.87	1037.43	200.884		893.89	792.66	202.46		2801.66	2205.57	1192.18						2446.65
	1970.71	1695.15	551.128		896.925	863.553	66.744		1715.16	1501.47	427.38		2736.49	2402.54	667.916		1498.25	1229.97	536.558		2628.04	2240.46	775.168						1046.62	956.177	180.89						648.152	612.396	71.512		2622.56	2048.4	1148.32						1979.77
	1779.07	1542.42	473.302						1465.33	1305.81	319.046		2648.4	2250.47	795.858		1198.35	1055.28	286.144		2216.09	1928.21	575.766						1020.24	890.069	260.336						580.171	599.187	-38.032		2430.32	2014.58	831.492						1649.7
	1881.38	1580.09	602.59						1249.63	1146.4	206.476		2523.97	2202.33	643.278		1098.56	937.468	322.182		2107.86	1857.94	499.826						953.73	816.421	274.618										2242.39	1859.62	765.546						1521.52
	1789.36	1501.6	575.528						1060.6	1001.6	117.994		2279.9	1975.82	608.156		1059.97	876.375	367.188		1930.34	1687.73	485.224						862.784	728.311	268.946										2157.05	1806.17	701.774						1445.54
	1587.37	1346.61	481.52										2391.09	1977.92	826.34		915.186	801.17	228.032		1907.01	1706.64	400.742						806.739	679.329	254.82										2169.26	1769.6	799.316
	1400.22	1202.3	395.842										2194.91	1907.96	573.898		830.142	746.396	167.492		1768.62	1601.74	333.77						721.796	642.726	158.14										2237.32	1783.62	907.402
	1099.16	998.613	201.1										2003.26	1777.52	451.482		705.334	675.946	58.776		1681.91	1562.96	237.888						684.614	587.066	195.096										2191.61	1774.86	833.502
	1064.34	934.717	259.238										1720.55	1559.23	322.654		581.041	538.711	84.66		1642.3	1533.64	217.336						623.673	571.255	104.836										2096.51	1755.27	682.48
	868.578	780.413	176.33										1514.82	1419.77	190.098														566.067	539.942	52.25										1831.3	1665.66	331.278
																																									1877.19	1720.57	313.244
																																									2128.96	1852.45	553.034
																																									2079.98	1869.44	421.086
																																									1981.83	1823.09	317.48
																																									1932.93	1733.97	397.912
[truncated: 49 more columns]
