# Supplementary material for: A stable microtubule bundle formed through an orchestrated multistep process controls quiescence exit
Source: eLife. 2024 Mar 25;12:RP89958. doi: 10.7554/eLife.89958 (PMC10963028; doi:10.7554/eLife.89958)
Supplement: Figure 4—source data 4. [file elife-89958-fig4-data4.xlsx]

## Sheet: Feuil1
	FWHM WT mEOS-Tub1						FWHM cin8delta mEOS-Tub1
n° Q-nMTbundle	Distance toward Q-nMT bundle emmergeance					n° Q-nMTbundle	Distance toward Q-nMT bundle emmergeance
	0.15 µm	0.45 µm	0.75 µm	1.05 µm			0.15 µm	0.45 µm	0.75 µm	1.05 µm
n=	46	45	40	29		n=	32	29	27	24
Mean	0.171022	0.155044	0.145625	0.14031		Mean	0.132905	0.12077	0.116083	0.117587
SD	0.0480044	0.0462223	0.0441063	0.035102		SD	0.0290756	0.0237893	0.017017	0.0167161
T-test	4.13061e-05	8.16578e-05	0.000330268	0.00357498		T-test	#DIV/0!	#DIV/0!	#DIV/0!	#DIV/0!
1	0.16	0.134	0.128	0.129		1	0.143	0.135	0.127	0.134
2	0.151	0.132	0.138	0.113		2	0.132	0.111	0.108	0.105
3	0.194	0.155	0.133	0.13		3	0.127	0.126	0.115	0.137
4	0.141	0.117	0.125	0.139		4	0.13	0.126	0.12	0.098
5	0.226	0.226	0.121	nd		5	0.142	0.121	0.107	nd
6	0.165	0.107	0.164	0.207		6	0.124	0.104	0.104	0.101
7	0.128	0.113	0.122	0.115		7	0.205	0.135	0.107	0.102
8	0.166	0.161	0.154	0.178		8	0.166	0.134	0.099	0.104
9	0.181	0.124	0.108	0.115		9	0.153	0.134	0.123	nd
10	0.146	0.119	0.121	0.114		10	0.117	0.123	nd	0.143
11	0.127	0.198	0.149	nd		11	0.129	0.117	0.108	0.127
12	0.141	0.126	0.119	0.107		12	0.145	0.145	0.121	0.127
13	0.141	0.125	0.133	0.142		13	0.169	0.16	0.131	0.146
14	0.31	nd	0.15	0.16		14	0.134	0.129	0.124	0.138
15	0.25	0.19	0.18	0.14		15	0.124	0.115	nd	0.138
16	0.26	nd	0.32	nd		16	0.179	0.187	0.16	0.121
17	0.2	0.22	0.19	0.19		17	0.113	nd	nd	0.13
18	0.21	0.2	0.24	nd		18	0.135	0.124	0.125	0.114
19	0.26	0.29	nd	nd		19	0.126	nd	0.129	0.116
20	0.18	0.22	nd	0.21		20	0.191	0.142	0.142	0.11
21	0.19	0.17	0.16	nd		21	0.105	0.094	0.103	0.115
22	0.14	0.12	0.11	0.13		22	0.174	0.145	0.117	0.102
23	0.18	0.16	nd	nd		24	0.12	nd	0.103	0.088
24	0.25	0.25	0.19	0.18		25	0.0985097	0.0960605	0.0863578	0.116714
25	0.17	0.14	nd	0.16		26	0.1	0.1	nd	nd
26	0.24	0.25	0.22	0.22		27	0.0866404	0.091162	0.0926457	nd
27	0.25	0.21	0.18	nd		28	0.129242	0.0980622	0.104468	0.118386
28	0.16	0.14	0.12	0.09		29	0.12538	0.093258	0.146505	nd
29	0.12	0.12	0.14	nd		30	0.136519	0.112192	0.0921747	0.0909972
30	0.11	0.12	0.11	0.13		31	0.0956601	0.0843797	0.116078	nd
31	0.11	0.1	0.1	0.11		32	0.117	0.137	0.123	nd
32	0.17	0.12	0.13	0.11		33	0.081012	0.0832257	nd	nd
33	0.15	0.14	0.14	nd
34	0.17	0.16	0.13	0.13
35	0.19	0.21	0.2	nd
36	0.14	0.14	nd	nd
37	0.16	0.16	0.16	0.16
38	0.16	0.13	0.12	0.13
39	0.09	0.08	0.09	0.1
40	0.16	0.13	0.12	0.13
41	nd	0.14	0.11	0.1
42	0.13	0.13	0.15	nd
43	0.19	0.18	0.11	nd
44	0.13	0.09	0.09	nd
45	0.11	0.13	nd	nd
46	0.14	0.16	0.15	nd
47	0.12	0.14	nd	nd
