# Supplementary material for: A stable microtubule bundle formed through an orchestrated multistep process controls quiescence exit
Source: eLife. 2024 Mar 25;12:RP89958. doi: 10.7554/eLife.89958 (PMC10963028; doi:10.7554/eLife.89958)
Supplement: Figure 4—source data 5. [file elife-89958-fig4-data5.xlsx]

## Sheet: Feuil1
								Normalized									Normalized									Normalized									Normalized									Normalized
		TUb1		kip1		TUb1	kip1				TUb1		kip1		TUb1	kip1				TUb1		kip1		TUb1	kip1				TUb1		kip1		TUb1	kip1				TUb1		kip1		TUb1	kip1				TUb1		kip1
						479.654	361.821	TUb1	kip1						612.533	362.108	TUb1	kip1						314.644	391.942	TUb1	kip1						867.499	409.564	TUb1	kip1						859.054	1312.55	TUb1	kip1
								21									19									11									16									12
								7									6.33333									3.66667									5.33333									4
0		172.831	160.766	859.116	923.243	24.1304	0	0.0502717	0		407.496	345.187	760.874	778.256	124.618	0	0.203447	0		565.41	571.567	2223.38	2370.87	0	0	0	0		341.702	331.437	1012.54	1045.78	20.5306	0	0.0236664	0		559.775	469.432	1174.15	1108.81	180.686	130.675	0.210332	0.36098		265.436	276.37	608.673
0.129		394.374	354.155	773.311	950.878	80.4376	0	0.167578	0		485.463	444.098	1014.22	897.071	82.7292	234.301	0.135061	0.64724		668.786	694.482	1996.72	2026.07	0	0	0	0		400.28	406.205	1229.12	1230.22	0	0	0	0		626.315	560.035	1043.77	1010.99	132.56	65.5596	0.154309	0.181104		208	256.359	732.241
0.258		540.886	499.115	953.473	1013.95	83.5428	0	0.174047	0		668.379	643.092	1280.09	1267.21	50.5748	25.7582	0.0825667	0.0711552		752.593	758.928	1927.12	2111.1	0	0	0	0		604.784	534.739	1315.51	1268.65	140.09	93.7028	0.161488	0.258848		809.995	730.991	1296.51	1167.24	158.008	258.539	0.183932	0.714196		300.889	319.605	1066.55
0.387		780.603	650.282	1008.26	1074.99	260.643	0	0.543006	0		847.716	797.083	1583.62	1523.8	101.266	119.626	0.165323	0.33046		1024.85	981.182	1942.14	2061.79	87.337	0	0.277574	0		844.875	779.787	1441.67	1458.84	130.177	0	0.15006	0		1171.22	1000.77	1457.38	1340.08	340.913	234.604	0.396847	0.648076		440.096	444.54	1070.84
0.516		1000.38	800.668	936.239	913.154	399.415	46.1698	0.832114	0.127541		1073.22	978.406	1916.41	1735.36	189.625	362.108	0.309575	1.0003		1203.9	1143.56	2282.91	2415.43	120.662	0	0.383486	0		1083.51	911.706	1558.19	1511.78	343.614	92.8154	0.396098	0.256396		1624.26	1388.85	1850.17	1555.22	470.817	589.905	0.548064	1.62957		500.01	505.524	842.15
0.645		1044.29	857.245	930.387	924.763	374.097	11.2494	0.779368	0.0310757		1330.08	1164.86	1958.17	1878.83	330.441	158.685	0.539467	0.438355		1172.43	1135.45	2393.68	2387.91	73.948	11.5406	0.235021	0.0318801		1166.21	973.523	1800.68	1713.62	385.384	174.104	0.444247	0.480951		1931.06	1609.11	2056.94	1677.19	643.906	759.496	0.749552	2.09805		603.188	570.931	959.695
0.774		952.866	834.36	1034.06	971.903	237.013	124.312	0.493778	0.343402		1384.81	1208.78	1581.9	1553.29	352.064	57.22	0.574768	0.158066		1146.61	1127.13	2647.61	2686.75	38.9702	0	0.123855	0		1342.93	1093.56	1851.51	1797.68	498.744	107.66	0.574922	0.297404		1884.78	1528.85	2032.92	1803.26	711.868	459.32	0.828665	1.26884		761.784	676.014	1290.5
0.903		916.542	748.462	1272.42	1134.67	336.158	275.494	0.70033	0.761032		1471.41	1243.12	1352.58	1366.5	456.583	0	0.745402	0		1118.23	1082.88	2803.48	2783.6	70.7082	39.77	0.224724	0.109862		1500.41	1248.85	1918.33	1860.1	503.112	116.45	0.579957	0.321685		1839.84	1455.92	2626.64	2206.17	767.848	840.927	0.89383	2.323		939.956	853.005	1504.83
1.032		934.512	774.697	1214.35	1036.61	319.629	355.475	0.665893	0.981975		1526.62	1248.4	1363.24	1389.32	556.452	0	0.908445	0		971.204	1010.08	3165.75	3001.22	0	329.049	0	0.908976		1584.31	1273.31	2045.26	2066.09	621.99	0	0.716992	0		1878.59	1449.06	3096.53	2440.26	859.054	1312.55	1	3.62582		1013.99	903.065	1605.96
1.161		908.952	694.321	1177.8	1050.03	429.262	255.524	0.894295	0.705867		1499.72	1193.45	1288.82	1330.52	612.533	0	1	0		1009.99	970.208	3436.44	3252.62	79.5654	367.645	0.252874	1.0156		1628.5	1357.77	2334.31	2233.62	541.472	201.397	0.624176	0.556346		1519.09	1208.98	2958.51	2348.75	620.225	1219.53	0.721986	3.36887		1032.14	940.733	1707.06
1.29		911.729	724.514	916.798	928.693	374.431	0	0.780064	0		1363.85	1160.73	1239.55	1165.42	406.241	148.26	0.663215	0.409559		1107.56	1017.11	3636.41	3440.44	180.896	391.942	0.574923	1.08271		1727.04	1393.57	2428.81	2365.21	666.925	127.202	0.768791	0.351386		1247.5	1017.01	2882.67	2319.7	460.986	1125.94	0.53662	3.11034		1070.65	953.018	1891.17
1.419		810.206	570.379	858.844	975.803	479.654	0	0.999278	0		1379.61	1129.48	1211.64	1217.1	500.25	0	0.816691	0		982.416	913.903	3458.94	3333.02	137.026	251.829	0.435495	0.695659		1753.54	1401.73	2864.02	2659.24	703.626	409.564	0.811098	1.13139		1005.47	856.556	2447.85	1945.09	297.836	1005.52	0.346702	2.77767		917.42	861.568	1617.45
1.548		906.864	669.07	901.032	954.628	475.589	0	0.990811	0		1263.18	1060.99	1051.97	1193.55	404.393	0	0.660198	0		944.095	786.773	3188.03	3252.63	314.644	0	1	0		1697.11	1263.36	2820.6	2775.25	867.499	90.7026	1	0.25056		789.451	696.317	1642.25	1389.07	186.268	506.369	0.216829	1.39881		903.084	803.626	1771.06
1.677		898.837	700.931	958.483	923.173	395.81	70.6204	0.824605	0.195084		1176.57	986.532	869.199	807.132	380.08	124.134	0.620506	0.34291		815.691	732.907	2618.28	2748.37	165.568	0	0.526208	0		1574.79	1269.51	2993.93	2864.98	610.574	257.897	0.703833	0.712424						0	0				865.398	809.907	1713.81
1.806		925.518	751.407	1169.14	1217.04	348.224	0	0.725466	0		1103.58	952.211	1010.33	864.921	302.731	290.808	0.494228	0.803338		517.655	526.086	2138.01	2095.27	0	85.4956	0	0.236176		1463.36	1182.62	3225.21	3022.17	561.471	406.065	0.64723	1.12173						0	0				795.586	773.195	1882.97
1.935		881.362	720.107	1337.42	1267.1	322.509	140.635	0.671894	0.388496		1054.37	926.57	756.947	694.172	255.6	125.55	0.417284	0.346823						0	0				1231.28	1040.5	3714.13	3561.24	381.546	305.782	0.439824	0.844701						0	0				877.64	802.977	2020.81
2.064		937.489	739.705	1665.92	1539.33	395.569	253.172	0.824101	0.699371		981.804	844.029	650.268	677.095	275.549	0	0.449852	0						0	0				1055.68	863.175	4061.92	3893.86	385.017	336.124	0.443824	0.928519						0	0				788.615	733.764	1892
2.193		990.979	829.921	1528.21	1475.26	322.116	105.895	0.671075	0.292528		882.724	777.034	738.847	653.484	211.38	170.726	0.345092	0.471619						0	0				804.814	731.376	3825.39	3627.62	146.875	395.53	0.169308	1.09263						0	0				695.98	678.208	1781.82
2.322		805.693	676.804	1859.34	1748.87	257.778	220.927	0.537037	0.610297		758.228	702.471	768.208	756.417	111.514	23.5826	0.182053	0.0651453						0	0				739.454	704.423	3030.11	3157.86	70.062	0	0.0807632	0						0	0				678.322	644.454	1888.95
2.451		805.505	683.493	1977.1	1839.44	244.025	275.322	0.508385	0.760557		696.817	642.169	748.891	750.107	109.297	0	0.178434	0						0	0				491.369	523.141	2321.65	2621.53	0	0	0	0						0	0				593.859	550.597	1770.55
2.58		633.482	557.96	1994.93	1842.11	151.045	305.638	0.314677	0.844304		551.583	509.367	718.909	653.086	84.4322	131.646	0.137841	0.363663						0	0								0	0								0	0				487.539	498.29	1593.52
2.709		429.128	392.937	1670.01	1489.1	72.382	361.821	0.150796	0.999507		447.338	414.383	767.024	702.914	65.9096	128.22	0.107602	0.354199						0	0								0	0								0	0				380.23	412.339	1619.6
2.838		251.04	247.891	1266.44	1227.71	6.2962	77.4648	0.0131171	0.213991		409.882	377.834	825.065	977.388	64.0946	0	0.104639	0						0	0								0	0								0	0
2.967
3.096
3.225
3.354
3.483
3.612
3.741
3.87
3.999
4.128
4.257
4.386
4.515
4.644
								Normalized									Normalized									Normalized									Normalized									Normalized
		TUb1		kip1		TUb1	kip1				TUb1		kip1		TUb1	kip1				TUb1		kip1		TUb1	kip1				TUb1		kip1		TUb1	kip1				TUb1		kip1		TUb1	kip1				TUb1		kip1
						279.391	401.309	TUb1	kip1						484.96	700.982	TUb1	kip1						516.303	762.276	TUb1	kip1						530.378	300.406	TUb1	kip1						344.135	563.388	TUb1	kip1
								10									14									18									18									11
								3.33333									4.66667									6									6									3.66667
0		257.752	246.504	1172.64	1047.45	22.496	250.375	0.080518			255.803	204.105	216.246	272.393	103.395	0	0.213203			299.748	292.103	998.064	1044.94	15.2894	0	0.0296132			236.567	242.276	978.576	914.493	0	128.167	0			221.595	267.057	664.061	720.102	0	0	0			166.426	172.447	452.399
0.129		285.861	303.39	1215.38	1172.97	0	84.8298	0			393.397	336.322	557.386	530.677	114.15	53.419	0.23538			427.934	383.968	1132.08	1167.42	87.9316	0	0.17031			406.035	345.411	1101.34	1091.25	121.247	20.174	0.228605			367.124	387.198	508.849	578.415	0	0	0			129.625	151.855	316.162
0.258		358.923	363.424	1205.22	1232.24	0	0	0			623.697	512.8	590.802	588.925	221.793	3.753	0.457343			562.827	462.758	1297.38	1259.71	200.139	75.3348	0.387638			543.925	502.542	1089.94	1128.73	82.7656	0	0.15605			275.548	315.519	703.8	662.216	0	83.1676	0			190.811	172.24	407.044
0.387		481.597	460.854	1337.66	1273.1	41.4854	129.114	0.148485			800.957	601.678	768.882	768.924	398.559	0	0.82184			647.521	561.631	1253.31	1221.84	171.78	62.9508	0.332712			641.96	608.889	1101.07	1201.5	66.1428	0	0.124709			501.982	471.351	715.07	717.74	61.2626	0	0.178019			279.285	252.249	449.146
0.516		623.034	626.709	1296.87	1232.96	0	127.821	0			857.307	614.828	919.439	868.666	484.96	101.545	1			786.054	650.5	1381.92	1272.43	271.107	218.992	0.525094			766.006	731.809	1193.79	1250.41	68.3928	0	0.128951			626.216	597.854	859.144	791.232	56.7244	135.825	0.164832			410.435	389.411	461.94
0.645		675.356	689.268	1136.6	1123.64	0	25.9196	0			813.83	629.696	1401.91	1104.81	368.268	594.204	0.759379			955.54	774.8	1407.02	1290.43	361.482	233.173	0.700135			857.483	780.888	1302.4	1281.99	153.189	40.8278	0.28883			703.76	678.04	973.002	933.05	51.4398	79.9036	0.149475			522.488	497.918	511.234
0.774		647.941	666.465	1004.96	1134.16	0	0	0			810.326	630.87	1182.89	1058.2	358.913	249.375	0.740089			982.052	820.797	1112.01	1187.28	322.509	0	0.62465			980.902	849.961	1293.94	1345.94	261.881	0	0.493762			893.399	721.332	911.313	870.665	344.135	81.2944	1			670.571	569.918	625.279
0.903		793.182	704.931	1168.42	1120.01	176.502	96.8214	0.631739			849.24	670.224	1179.76	1094.14	358.033	171.245	0.738274			1126.88	912.206	1669.78	1623.37	429.349	92.83	0.831584			1075.03	898.371	1232.98	1174.87	353.326	116.205	0.666178			822.479	728.955	1093.38	1046.65	187.048	93.459	0.543531			703.881	611.501	469.847
1.032		780.946	641.251	1123.52	965.377	279.391	316.28	1			870.365	671.42	1483.71	1180.98	397.891	605.458	0.820461			1102.8	883.86	1800.17	1646	437.882	308.334	0.84811			1090.04	947.155	1280.68	1215.17	285.773	131.028	0.53881			780.742	713.578	1142.76	1243.95	134.328	0	0.390335			864.448	708.725	602.747
1.161		725.773	642.959	1083.73	1157.78	165.628	0	0.592818			769.048	598.743	1534.39	1183.9	340.61	700.982	0.702346			1162.4	922.702	2117.32	1900.62	479.39	433.404	0.928505			964.733	830.345	1312.71	1247.98	268.776	129.474	0.506763			949.129	782.03	1465.8	1428.41	334.197	74.7788	0.97112			883.535	745.62	826.227
1.29		739.328	633.782	1235.54	1237.73	211.091	0	0.755539			771.238	582.611	1516.29	1209.55	377.254	613.472	0.777909			1212.01	953.861	2184.06	1802.92	516.303	762.276	1			925.147	862.759	1124.64	1137.47	124.777	0	0.23526			858.55	705.255	1436.05	1365.02	306.59	142.057	0.890898			800.705	677.988	1012.47
1.419		727.069	629.933	1489.62	1298.15	194.272	382.952	0.695341			650.083	503.294	1209.04	1048.8	293.58	320.472	0.605369			1000.05	828.79	1863.41	1602.73	342.522	521.371	0.663413			1010.4	880.621	1270.62	1219.21	259.554	102.816	0.489376			753.151	665.441	1698.86	1585.64	175.42	226.447	0.509742			812.684	730.948	1005.06
1.548		663.29	573.365	1567.91	1484.38	179.849	167.067	0.643719			612.298	506.195	857.217	828.713	212.207	57.0076	0.437576			778.918	676.788	1636.49	1366.27	204.26	540.43	0.395621			1085.59	943.667	1455.64	1363.95	283.846	183.379	0.535176			592.363	537.84	2342.09	2098.43	109.045	487.311	0.316865			767.333	716.261	1219.74
1.677		546.97	495.688	1933.53	1763.91	102.563	339.242	0.367095			457.361	370.693	676.449	661.19	173.338	30.5188	0.357427			1006.12	825.793	1593.01	1384.41	360.657	417.198	0.698538			1173.27	973.935	1312.54	1396.07	398.66	0	0.751653			549.814	493.921	2440.81	2159.12	111.786	563.388	0.324831			803.661	739.906	1213.05
1.806		493.975	433.797	2416.07	2221.13	120.356	389.878	0.430782			366.129	285.063	706.101	736.778	162.132	0	0.33432			872.007	737.411	1553.07	1454.18	269.193	197.778	0.521385			1156.5	970.658	1568.14	1449.91	371.68	236.458	0.700783			517.822	475.674	1839.22	1621.08	84.297	436.273	0.244953			824.007	727.726	1054.86
1.935		494.363	456.434	2790.47	2589.82	75.8586	401.309	0.271514			324.809	278.682	501.744	619.861	92.253	0	0.190228			731.943	690.782	1337.11	1334.2	82.3222	5.8234	0.159446			1163.56	966.847	1541.43	1430.53	393.429	221.815	0.74179			512.86	500.795	1423.83	1437.1	24.129	0	0.0701148			666.754	629.826	957.838
2.064		391.419	413.497	2591.98	2395.09	0	393.793	0			221.435	193.611	447.78	425.817	55.6468	43.9254	0.114745			772.405	637.777	1357.06	1361.32	269.256	0	0.521508			1291.73	1026.54	1595.71	1445.51	530.378	300.406	1									0			575.84	534.37	955.567
2.193		337.166	325.446	2158.81	1982.99	23.4402	351.638	0.0838975			215.499	199.435	412.367	426.664	32.1276	0	0.066248			636.636	564.85	1517.87	1470.36	143.573	95.023	0.27808			1186.81	985.324	1657.06	1597.71	402.981	118.716	0.759799									0			575.595	561.146	1212.61
2.322		348.357	335.128	1688.41	1620.32	26.4566	136.197	0.0946939			210.029	178.197	293.586	281	63.6648	25.1722	0.131279			618.097	587.094	1510.74	1437.92	62.0058	145.642	0.120096			1128.34	891.676	1763.71	1616.3	473.321	294.826	0.892421									0			433.837	457.793	1264.55
2.451		328.875	291.92	1280.89	1262.46	73.9102	36.8732	0.264541			165.47	148.779	354.081	325.235	33.3814	57.6914	0.0688334			567.809	567.066	1620.02	1513.2	1.4868	213.626	0.0028797			975.476	801	1808.47	1664.81	348.952	287.322	0.65793									0			384.223	407.095	1337.23
2.58		298.144	333.67	1081.12	1071.66	0	18.9174	0							0	0	0			440.458	439.955	1419.91	1364.05	1.007	111.737	0.00195041			845.558	719.014	1625.4	1528.36	253.089	194.097	0.477186									0			379.94	380.27	1231.62
2.709						0	0	0							0	0	0			401.031	399.092	1386.54	1280.73	3.879	211.626	0.00751303			735.637	611.48	1558.36	1486.89	248.314	142.936	0.468183									0			252.727	262.271	960.552
2.838						0	0								0	0								0	0				549.197	469.993	1576	1465.32	158.408	221.376	0.298669
2.967																													327.18	325.85	1571.94	1452.24	0	239.396	0
3.096																													285.45	271.613	1311.77	1309.42	27.6738	0	0.0521775
3.225																													238.099	226.286	1227.11	1120.64	0	212.939	0
3.354																																			0
3.483
3.612
3.741
3.87
3.999
4.128
4.257
4.386
4.515
4.644
								Normalized									Normalized									Normalized									Normalized									Normalized
		TUb1		kip1		TUb1	kip1				TUb1		kip1		TUb1	kip1				TUb1		kip1		TUb1	kip1				TUb1		kip1		TUb1	kip1				TUb1		kip1		TUb1	kip1				TUb1		kip1
						457.109	1208.29	TUb1	kip1						545.654	381.967	TUb1	kip1						438.602	657.052	TUb1	kip1						771.948	552.806	TUb1	kip1						228.857	365.913	TUb1	kip1
								13									14									13									11									8
								4.33333									4.66667									4.33333									3.66667									2.66667
0		467.05	484.874	1002.22	1036.92	0	0	0			500.779	515.836	2202.87	2036.3	0	333.135	0			498.128	492.78	1309.85	1500.74	10.6964	0	0.0243875			792.832	808.837	1399.35	1501.24	0	0	0			503.206	497.739	921.725	977.799	10.9354	0	0.0477827			526.161	494.327	1145.98
0.129		609.648	612.058	1201.1	1168.22	0	65.7618	0			663.556	649.538	2134.98	2142.03	28.0366	0	0.0513816			709.643	642.876	1567.18	1540.33	133.533	53.7088	0.304452			1078.25	1022.41	1838.78	1740.68	111.693	196.203	0.144689			599.347	611.464	872.567	1013.02	0	0	0			679.823	592.109	1213
0.258		736.481	681.131	1219.43	1267.37	110.701	0	0.242176			928.581	789.411	2149.4	2056.97	278.34	184.852	0.510104			862.316	793.251	1802.65	1741.24	138.13	122.809	0.314934			1352.82	1235.8	1827.86	1782.73	234.039	90.2588	0.303179			923.994	900.903	1329.69	1331.59	46.1822	0	0.201795			896.217	726.44	1262.3
0.387		1024.08	834.688	1327.29	1337.96	378.785	0	0.828653			1259.24	986.414	2184.11	2036.6	545.654	295.024	1			1079.85	995.889	1705.68	1777.43	167.914	0	0.382838			1596.76	1407.27	2236.29	2087.64	378.989	297.299	0.490952			1298.87	1204.47	1741.09	1647.78	188.795	186.611	0.824946			1206.08	957.431	1424.86
0.516		1177.11	948.591	1382.8	1348.02	457.038	69.5568	0.999844			1359.15	1114.22	2021.97	1993	489.865	57.9348	0.897758			1303.57	1186.8	1929.46	2005.26	233.53	0	0.532441			1794.54	1540.15	2103.86	2069.96	508.772	67.8068	0.659076			1471.63	1357.2	2058.77	2032.22	228.857	53.1156	1			1336.66	1079.41	1510.24
0.645		1268.24	1045	1700.06	1572.98	446.481	254.165	0.976748			1449.65	1182.5	2235.26	2054.95	534.313	360.621	0.979216			1239.84	1158.06	1888.16	1996.46	163.552	0	0.372894			1950.77	1564.79	2199.86	2092.88	771.948	213.958	1			1428.52	1316.76	2292.17	2163.96	223.511	256.416	0.976641			1447.9	1162.99	1423.18
0.774		1204.91	1019.84	1826.55	1697.06	370.129	258.977	0.809716			1502.13	1277.05	2038.19	2001.39	450.156	73.6048	0.824984			1339.97	1196.05	2048.97	2111.18	287.851	0	0.656291			1778.2	1393.79	2555.14	2286.49	768.832	537.297	0.995963			1225.13	1161.8	2156.49	2011.63	126.673	289.717	0.553505			1493.19	1178.13	1481.85
0.903		1179.72	1002.41	1748.22	1604.49	354.617	287.457	0.775782			1436.72	1238.1	2054.65	2093.5	397.236	0	0.728			1439.78	1300.36	2162.55	2042.11	278.842	240.872	0.635752			1449.31	1189.28	2237.01	2106.23	520.067	261.569	0.673707			1104.37	1083	2334.64	2181.68	42.7358	305.928	0.186736			1360.74	1136.07	1380.49
1.032		1067.87	934.077	1809.32	1647.87	267.582	322.891	0.585378			1372.99	1205.09	2189.41	2131.64	335.797	115.557	0.615403			1489.13	1269.83	2635.87	2307.34	438.602	657.052	1			1233.25	970.773	2606.9	2330.5	524.962	552.806	0.680049			1005.74	960.259	2314.45	2132.12	90.952	364.645	0.397419			1246.42	1042.5	1380.59
1.161		1161.77	933.219	2160.88	1859.66	457.109	602.428	1			1377.06	1200.77	2608.57	2446.31	352.562	324.518	0.646128			1310.43	1165.86	2399.02	2471.96	289.14	0	0.659231			1045.11	855.789	2555.79	2334.17	378.638	443.234	0.490497			909.231	867.259	2296.1	2113.15	83.9446	365.913	0.3668			1169.8	1024.94	1446.67
1.29		992.912	811.296	2344.46	1948	363.232	792.919	0.794629			1310.23	1128.17	2773.84	2582.86	364.119	381.967	0.667308			1217.29	1056.97	2380.47	2513.84	320.644	0	0.73106			873.999	735.622	2137.3	1996.89	276.752	280.823	0.358511			816.43	828.789	2331.59	2348.64	0	0	0			1215.33	973.274	1582.25
1.419		875.785	701.282	2717.07	2112.93	349.006	1208.29	0.763507			1236.67	1086.48	2793.92	2656.44	300.374	274.961	0.550485			931.594	855.848	2228.43	2331.63	151.493	0	0.3454			717.059	609.709	1721.16	1701.34	214.701	39.6428	0.278129			688.692	678.122	2552.42	2690.81	21.1408	0	0.0923757			1084.72	907.69	1850.76
1.548		803.206	629.528	2343.77	1881.79	347.357	923.952	0.7599			1113.82	969.081	2592.61	2538.64	289.486	107.946	0.530531			863.267	738.8	2378.53	2349.56	248.934	57.9452	0.567562							0	0				525.605	520.73	2442.06	2456.49	9.7494	0	0.0426004			990.409	841.227	2155.39
1.677		616.587	523.023	1692.79	1531.83	187.128	321.92	0.409373			970.025	835.919	2256.77	2258.31	268.213	0	0.491544			560.472	534.908	1959.93	2034.97	51.1272	0	0.116569							0	0				508.483	502.474	1926.82	1884.54	12.0176	84.5556	0.0525114			943.899	797.673	2481.08
1.806		500.191	476.106	1746.91	1574.58	48.1706	344.667	0.105381			878.932	780.6	2292.48	2308.28	196.665	0	0.360421			451.332	481.844	1747.45	1882.72	0	0	0							0	0								0	0				823.213	706.792	2579.17
1.935						0	0	0			642.043	627.297	2167.92	2291.04	29.4934	0	0.0540514							0	0	0							0	0								0	0				833.476	708.74	2475.25
2.064						0	0	0			547.516	461.073	2287.49	2160.95	172.885	253.085	0.316839							0	0	0							0	0								0	0				737.81	714.483	1990.72
2.193						0	0	0			215.499	199.435	412.367	426.664	32.1276	0	0.058879							0	0	0							0	0								0	0				680.472	662.146	1731.17
2.322						0	0				210.029	178.197	293.586	281	63.6648	25.1722	0.116676							0	0	0							0	0								0	0				615.691	573.383	1288.56
2.451						0	0				165.47	148.779	354.081	325.235	33.3814	57.6914	0.0611768							0	0	0							0	0								0	0				539.973	532.693	1158.33
2.58						0	0								0	0								0	0								0	0								0	0
2.709						0	0								0	0								0	0								0	0								0	0
2.838						0	0								0	0								0	0								0	0								0	0
2.967
3.096
3.225
3.354
3.483
3.612
3.741
3.87
3.999
4.128
4.257
4.386
4.515
4.644
[truncated: 109 more columns]
