# Supplementary material for: A stable microtubule bundle formed through an orchestrated multistep process controls quiescence exit
Source: eLife. 2024 Mar 25;12:RP89958. doi: 10.7554/eLife.89958 (PMC10963028; doi:10.7554/eLife.89958)
Supplement: Figure 5—figure supplement 1—source data 1. [file elife-89958-fig5-figsupp1-data1.xlsx]

## Sheet: Feuil1
	% of MT length - align on MT shrink initiation (define as >30%/step)
	ROI	1	2	3	4	5	6	7	8	9	10	11	12	13	14	15	16	17	18	19	20	21	22	23	24	25	26	27	28	29	30	31	32	33	34	35	36	37	38	39	40	41	42	43	44	45	46	47	48
	Time (min)
	-240	100																		100																									100
	-225	94																		89																									99
	-210	105	100				100	100	100		100									92																									101
	-195	102	79				108.1	95	96		103									85																									104
	-180	88	nd		100		105.4	73	86		104								100	nd																			100						107
	-165	98	nd		95.3		nd	98	98		101							100	95	93																			100						nd				100
	-150	93	nd		93.7		107.1	99	96		nd					100		99	99	89	100							100		100		100				100			nd						107	100	100		114
	-135	nd	nd		nd		96.5	95	87		nd				100	105		102	89	nd	89							90		nd		100				111			90						nd	95	nd	100	116
	-120	94	nd		nd	100	nd	nd	90		81				93	nd	100	103	107	96	102	100		100				nd	100	nd		105	100			103		100	110	100	100		100		111	95	89	100	106
	-105	nd	nd		104.2	97.7	nd	nd	nd	100	nd				97	93	117	nd	nd	nd	107	92		116		100		97	nd	nd		nd	88			nd		103	120	nd	107		100		nd	99	nd	113	106
	-90	94	86		nd	90.8	nd	nd	nd	101	nd		100		nd	88	89	nd	113	94	nd	nd		115		103		98	95	97		nd	nd	100		100		104	106	nd	97	100	96	100	110	84	97	140	107
	-75	nd	nd	100	nd	111.2	nd	nd	nd	98	nd		98.4		108	nd	nd	nd	nd	nd	nd	103	100	102		99		100	95	nd	100	nd	96	102	100	113		nd	nd	nd	90	88	88	nd	nd	nd	nd	131	nd
	-60	94	77	86	nd	104.5	114.9	107	97	101	81	100	104.6	100	111	97	96	nd	nd	97	113	108	97	111	100	nd	100	101	136	nd	85	nd	nd	94	118	nd	100	95	100	nd	95	96	nd	nd	nd	91	93	123	113
	-45	nd	nd	80	nd	110.5	nd	nd	nd	nd	nd	106.9	nd	nd	nd	nd	96	nd	nd	nd	nd	105	90	nd	nd	nd	92	nd	124	nd	nd	nd	nd	96	nd	nd	102	nd	nd	nd	98	nd	nd	109	nd	nd	nd	nd	nd
	-30	88	77	72	94	89.5	105	107	92	101	88	97.3	96.1	105	107	nd	92	112	107	81	113	105	91	110	98	95	100	121	126	nd	87	110	89	90	102	120	101	91	107	99	85	98	94	111	137	89	93	127	113
	-15	nd	nd	73	nd	nd	nd	nd	nd	nd	nd	92	97.2	114	nd	nd	nd	nd	nd	nd	nd	nd	nd	nd	nd	nd	95	nd	nd	nd	88	nd	nd	98	107	nd	97	nd	nd	nd	nd	97	nd	113	nd	nd	nd	nd	nd
	0	54	31	20	22	64.5	27.6	29	30	69	16	78.8	76.8	41	27	28	43	32	21	31	35	69	14	31	14	98	75	55	13	105	53	87	18	50	76	67	51	10	14	11	15	13	78	67	17	43	40	12	8
	15		nd	15	nd	nd	nd	nd	nd	nd	nd	30.1	nd	46	nd	nd	nd	nd	nd		nd	nd	nd	nd	nd	nd	73	nd	nd	nd	36	nd	nd	nd	71	nd	32	nd	nd	nd	nd	nd	nd	nd		nd	nd	nd	nd
	30		37	nd	22	37.8	27.6	29	23	23	16	19.6	20.6	43	22	11	39	32	21		20	54	14	26	14	94	66	26	13	16	nd	50	15	57	nd	39	nd	10	14	11	15	14	28	60		14	nd	12	8
	45			14		nd				nd		nd	nd	nd	nd	nd	nd	nd	nd		nd	nd	nd		nd	nd	nd	nd		nd	17	nd	nd	nd	24	nd	30	nd	nd	nd		nd	nd	nd		nd	nd		nd
	60			nd		19.9				23		25.5	20.6	25	22	11	28	32	21			52	14		14	26	38	26		16	nd	17	15	23	nd	39	nd	7	14	11		17	11	20		14	21		8
	75			14		nd				nd		nd		nd			nd									nd	nd				31	nd		nd	19		17					nd	nd	nd			nd
	90					24.5				23		20.9		27			16									16	38				nd	17		12			nd					17	11	20			21
	105									nd																					35						22							nd
	120									23																					nd													24
	135																														15													d
	150																																											24
	Only select ROI where SPB duplicate - aligned on SPB separation
		4	6	7	9	12	15	20	21	22	23b	23	25b	26	27	31b	29	33b	30	32	33	34	35	36	37	38	39	40	41	42	45	52b	46	54b	56b	49	mean
	-240		100	100																						100							100			100	100
	-225		108.1	95																						100							nd			97	100
	-210	100	105.4	73				100							100											nd				100		100	89		100	94	96
	-195	95.3	nd	98				89							90											90				100		91	nd		92	98	94
	-180	93.7	107.1	99		100		102							nd		100				100		100		100	110				96	100	91	97	100	83	nd	99
	-165	nd	96.5	95	100	98.4		107							97		nd				102		111	100	103	120				88	95	90	nd	81	89	nd	98
	-150	nd	nd	nd	101	104.6	100	nd	100			100	100	100	98	100	nd	100	100	100	94	100	103	102	104	106	100	100	100	nd	95	85	93	81	89	112	99
	-135	104.2	nd	nd	98	nd	105	nd	92	100		116	95	92	100	nd	nd	nd	85	88	96	118	nd	101	nd	nd	nd	107	88	nd	99	83	nd	92	71	nd	97
	-120	nd	nd	nd	101	96.1	nd	113	nd	97	100	115	nd	100	101	91	97	89	nd	nd	90	nd	100	97	95	100	nd	97	96	94	84	86	93	114	nd	114	98
	-105	nd	nd	nd	nd	97.2	93	nd	103	90	115	102	nd	95	nd	91	nd	nd	87	96	98	102	113	51	nd	nd	nd	90	nd	nd	nd	nd	nd	102	nd	nd	96
	-90	nd	114.9	107	101	76.8	88	113	108	91	113	111	90	75	121	130	nd	nd	88	nd	50	107	nd	32	91	107	nd	95	98	78	91	78	40	100	74	91	93
	-75	nd	nd	nd	nd	nd	nd	nd	105	nd	138	nd	120	73	nd	118	nd	112	53	nd	nd	76	nd	nd	nd	nd	nd	98	97	nd	nd	nd	nd	nd	nd	nd	100
	-60	94	105	107	69	20.6	97	35	105	14	134	110	134	66	55	120	nd	71	36	89	57	71	120	30	10	14	99	85	13	28	89	25	nd	103	11	22	71
	-45	nd	nd	nd	nd	nd	nd	nd	nd	nd	nd	nd	nd	nd	nd	nd	nd	nd	nd	nd	nd	nd	nd		nd	nd	nd	nd	nd	nd	nd	nd	nd	nd	nd	nd
	-30	22	27.6	29	23	20.6	nd	20	69	14	27	31	19	38	26	13	105	12	17	18	23	24	67	17	10	14	11	15	14	11	43	22	21	10	17	22	26
	-15	nd	nd	nd	nd		nd	nd	nd	nd		nd	nd	nd	nd		nd		nd	nd	nd	nd	nd		nd	nd	nd	nd	nd	nd	nd	nd	nd	d	nd	nd
	0	22	27.6	29	23		28		54	14		26	19	38	26	13	16		31	15	12	19	39	22	7	14	11	15	17	11	14		21	10		22	21
	15				nd		nd		nd								nd		nd	nd			nd				nd				nd
	30				23	20.6	11		52	18			14				16		35	15			39				11		17		14						22
	45				nd		nd												nd
	60				23		11						14						15																		16
	75
	90
	105
	120
	135
	150
[truncated: 2 more columns]
