# Supplementary material for: A stable microtubule bundle formed through an orchestrated multistep process controls quiescence exit
Source: eLife. 2024 Mar 25;12:RP89958. doi: 10.7554/eLife.89958 (PMC10963028; doi:10.7554/eLife.89958)
Supplement: Figure 5—source data 3. [file elife-89958-fig5-data3.xlsx]

## Sheet: exit SPB
			data1	data1	data1	data2	data2	data3	data3	data4	data4	data4	WT		kip3she1delta
			Y11026	Y289	Y290	Isy760	Y289	Isy760	Y289	Y11026	Y289	Y290	Mean	SD	Mean	SD
	1SPB	4d	67	75	71	233	211	222	223	68	62	92
	2SPB		3	1	2	6	3	3	3	3	2	6
	% 2SPB		0.0428571	0.0131579	0.0273973	0.0251046	0.0140187	0.0133333	0.0132743	0.0422535	0.03125	0.0612245	0.0308871	0.0143068	0.0267204	0.018737
	1SPB	exit 45m	nd	nd	nd	347	195	200	209	95	96	98					4d
	2SPB		nd	nd	nd	7	1	3	1	3	4	9					+45min
	% 2SPB		nd	nd	nd	0.019774	0.00510204	0.0147783	0.0047619	0.0306122	0.04	0.0841121	0.0217215	0.00809462	0.033494	0.035388	+60min
	1SPB	exit 60m	126	111	132	nd	nd	135	185	90	119	nd					+90min
	2SPB		6	4	6	nd	nd	1	3	10	5	nd					+115min
	% 2SPB		0.0454545	0.0347826	0.0434783	nd	nd	0.00735294	0.0159574	0.1	0.0403226	nd	0.0509358	0.0465661	0.0336352	0.0158748
	1SPB	exit 90m	36	99	94	66	237	62	175	27	138	88
	2SPB		70	13	19	106	19	97	16	73	35	43
	% 2SPB		0.660377	0.116071	0.168142	0.616279	0.0742188	0.610063	0.0837696	0.73	0.202312	0.328244	0.65418	0.0552868	0.162126	0.0951155
	1SPB	exit 115m	19	90	68	25	162	19	148	18	62	63
	2SPB		59	65	47	76	119	109	129	44	36	48
	% 2SPB		0.75641	0.419355	0.408696	0.752475	0.423488	0.851562	0.465704	0.709677	0.367347	0.432432	0.767531	0.0598851	0.419504	0.0321081
			wT		kip3deltashe1delta		wT		kip3deltashe1delta		kip3deltashe1delta				kip3deltashe1delta				WT		kip3she1delta
			Isy760		IsY289		Isy760		IsY289		Isy289		Isy290		Isy289		Isy290		Mean	SD	Mean	SD
			n=	225	n=	226	n=	239	n=	214	n=	206	n=	234	n=	198	n=	234	n=	464	n=	1312
	1SPB QMT	4d	0.573333	129	0.654867	148	0.569038	136	0.813084	174	96	0.466019	148	0.632479	123	0.621212	148	0.632479	0.571185	0.0030375	0.63669	0.110317
	1SPB NO-QnMT		0.413333	93	0.331858	75	0.405858	97	0.172897	37	108	0.524272	68	0.290598	72	0.363636	68	0.290598	0.409596	0.00528604	0.328977	0.115461
	2SPB QMT		0	0	0	0	0	0	0	0	0	0	0	0	0	0	0	0	0	0	0	0
	2SPB NO-QnMT		0.0133333	3	0.0132743	3	0.0251046	6	0.0140187	3	2	0.00970874	18	0.0769231	3	0.0151515	18	0.0769231	0.019219	0.00832354	0.0343332	0.0330401
			n=	203	n=	210	n=	354	n=	196	n=	0	n=	178	n=	175	n=	178	n=	557	n=	937
	1SPB QMT	exit 45m	0.133005	27	0.595238	125	0.112994	40	0.811224	159	nd	nd	80	0.449438	105	0.6	80	0.449438	0.123	0.0141496	0.581068	0.148479
	1SPB NO-QnMT		0.852217	173	0.4	84	0.867232	307	0.183673	36	nd	nd	95	0.533708	70	0.4	95	0.533708	0.859724	0.0106171	0.410218	0.143205
	2SPB QMT		0	0	0	0	0	0	0	0	nd	nd	0	0	0	0	0	0	0	0	0	0
	2SPB NO-QnMT		0.0147783	3	0.0047619	1	0.019774	7	0.00510204	1	nd	nd	3	0.0168539	0	0	3	0.0168539	0.0172762	0.00353248	0.00871436	0.00769929
			n=	136	n=	188	n=	0	n=	0	n=	254	n=	0	n=	140	n=	0	n=	136	n=	582
	1SPB QMT	exit 60m	0.0294118	4	0.574468	108	nd	nd	nd	nd	119	0.468504	nd	nd	86	0.614286	nd	nd	0.0294118	#DIV/0!	0.552419	0.0753505
	1SPB NO-QnMT		0.963235	131	0.409574	77	nd	nd	nd	nd	132	0.519685	nd	nd	53	0.378571	nd	nd	0.963235	#DIV/0!	0.435944	0.0741604
	2SPB QMT		0	0	0	0	nd	nd	nd	nd	0	0	nd	nd	0	0	nd	nd	0	#DIV/0!	0	0
	2SPB NO-QnMT		0.00735294	1	0.0159574	3	nd	nd	nd	nd	3	0.011811	nd	nd	1	0.00714286	nd	nd	0.00735294	#DIV/0!	0.0116371	0.00440987
			n=	159	n=	191	n=	172	n=	256	n=	238	n=	240	n=	332	n=	240	n=	331	n=	1497
	1SPB QMT	exit 90m	0.0125786	2	0.376963	72	0.0523256	9	0.421875	108	84	0.352941	48	0.2	128	0.385542	48	0.2	0.0324521	0.0281053	0.322887	0.0977284
	1SPB NO-QnMT		0.377358	60	0.539267	103	0.331395	57	0.503906	129	130	0.546218	118	0.491667	165	0.496988	118	0.491667	0.354377	0.0325008	0.511619	0.0246223
	2SPB QMT		0.01	1	0.011236	1	0.00862069	1	0.0078125	1	0	0	0	0	1	0.00301205	0	0	0.00931034	0.00097532	0.00367675	0.0048009
	2SPB NO-QnMT		0.603774	96	0.078534	15	0.610465	105	0.0703125	18	24	0.10084	74	0.308333	38	0.114458	74	0.308333	0.607119	0.00473163	0.163469	0.113303
			n=	128	n=	277	n=	101	n=	281	n=	0	n=	126	n=	170	n=	0	n=	229	n=	854
	1SPB QMT	exit 115m	0.0078125	1	0.0794224	22	0.00990099	1	0.177936	50	nd	nd	28	0.222222	22	0.129412	nd	nd	0.00885675	0.00147679	0.152248	0.0615936
	1SPB NO-QnMT		0.140625	18	0.454874	126	0.237624	24	0.398577	112	nd	nd	52	0.412698	69	0.405882	nd	nd	0.189124	0.0685885	0.418008	0.0252447
	2SPB QMT		0	0	0	0	0.0128205	1	0.00588235	1	nd	nd	2	0.015873	1	0.00588235	nd	nd	0.00641026	0.00906547	0.00690943	0.00658776
	2SPB NO-QnMT		0.851562	109	0.465704	129	0.742574	75	0.419929	118	nd	nd	44	0.349206	78	0.458824	nd	nd	0.797068	0.0770663	0.423416	0.0534203
